# Supplementary material for: Centenarian SIRT6 variants elevate SIRT6 protein and enhance cellular senescence resistance
Source: Research Square preprint supplement (doi:10.21203/rs.3.rs-9997679/v1), 2026-06-19
Supplement: Supplementary file 2 [file 72502aaf9d838cc2d996f0f4.xlsx]

## Sheet: Tables
Supplementary Table	Title and description
Table S1	Endogenous SIRT6-IP MS in WT and CENT hMSCs
Table S2	DEG analysis of WT and CENT hMSCs at early passage
Table S3	DEG analysis of WT and CENT hMSCs expressing GFP-progerin
Table S4	DETE analysis of WT and CENT hMSCs at early passage
Table S5	DETE analysis of WT and CENT hMSCs expressing GFP-progerin

## Sheet: S1
Protein FDR Confidence: Combined	Accession	Description	Sum PEP Score	Coverage [%]	# Peptides	# PSMs	# Unique Peptides	# AAs	MW [kDa]	calc. pI	Score Sequest HT: Sequest HT	# Peptides (by Search Engine): Sequest HT	Entrez Gene ID	Gene Symbol	Abundances (Grouped): CENT	Abundances (Grouped): WT	Abundance: F14: 131N, Sample, CENT, Rep01	Abundance: F14: 131C, Sample, CENT, Rep02	Abundance: F14: 130N, Sample, WT, Rep01	Abundance: F14: 130C, Sample, WT, Rep02
High	P35579	Myosin-9 OS=Homo sapiens OX=9606 GN=MYH9 PE=1 SV=4	2148.16	68	150	10430	119	1960	226.4	5.6	34479.2	150	4627	MYH9	1.07358e+06	1.05668e+06	840716	1.37095e+06	1.25621e+06	888842
Checked	Annotated Sequence	Modifications	Qvality q-value	# Protein Groups	# Proteins	# PSMs	Master Protein Accessions	Positions in Master Proteins	Modifications in Master Proteins	# Missed Cleavages	Theo. MH+ [Da]	Abundance Ratio: (HO) / (WT)	Abundances (Grouped) CV [%]: HO	Quan Info	Channel Occupancy [%]	Sequence in Protein
FALSE	[K].MQQNIQELEEQLEEEESAR.[Q]	1xTMT6plex [N-Term]	0.00030973	1	1	39	P35579	P35579 [941-959]		0	2562.22	1.065	42.1		100	K.MQQNIQELEEQLEEEESAR.Q
FALSE	[K].MQQNIQELEEQLEEEESAR.[Q]	1xOxidation [M1]; 1xTMT6plex [N-Term]	0.00030973	1	1	128	P35579	P35579 [941-959]		0	2578.21	1.045	33.02		100	K.MQQNIQELEEQLEEEESAR.Q
FALSE	[K].MEDSVGCLETAEEVK.[R]	1xCarbamidomethyl [C7]; 1xTMT6plex [K15]; 1xTMT6plex [N-Term]	0.00030973	1	1	59	P35579	P35579 [1373-1387]		0	2155.07	1.078	35.7		100	K.MEDSVGCLETAEEVK.R
FALSE	[K].MEDSVGCLETAEEVK.[R]	1xCarbamidomethyl [C7]; 1xOxidation [M1]; 1xTMT6plex [K15]; 1xTMT6plex [N-Term]	0.00030973	1	1	127	P35579	P35579 [1373-1387]		0	2171.06	1.077	35.11		100	K.MEDSVGCLETAEEVK.R
FALSE	[K].MEDSVGCLETAEEVKR.[K]	1xCarbamidomethyl [C7]; 1xTMT6plex [K15]; 1xTMT6plex [N-Term]	0.00030973	1	1	20	P35579	P35579 [1373-1388]		1	2311.17	0.985	45.22		100	K.MEDSVGCLETAEEVKR.K
FALSE	[K].MEDSVGCLETAEEVKR.[K]	1xCarbamidomethyl [C7]; 1xOxidation [M1]; 1xTMT6plex [K15]; 1xTMT6plex [N-Term]	0.00030973	1	1	32	P35579	P35579 [1373-1388]		1	2327.16	0.968	36.97		100	K.MEDSVGCLETAEEVKR.K
FALSE	[K].NKHEAMITDLEER.[L]	1xTMT6plex [K2]; 1xTMT6plex [N-Term]	0.00030973	1	1	2	P35579	P35579 [1023-1035]		1	2044.09	0.913	4.07		100	K.NKHEAMITDLEER.L
FALSE	[K].NKHEAMITDLEER.[L]	1xOxidation [M6]; 1xTMT6plex [K2]; 1xTMT6plex [N-Term]	0.00030973	1	1	3	P35579	P35579 [1023-1035]		1	2060.08	0.958	4.22		100	K.NKHEAMITDLEER.L
FALSE	[K].NFINNPLAQADWAAK.[K]	1xTMT6plex [K15]; 1xTMT6plex [N-Term]	0.00030973	1	1	8	P35579	P35579 [15-29]		0	2131.17	0.964	40.1		100	K.NFINNPLAQADWAAK.K
FALSE	[R].NCAAYLK.[L]	1xCarbamidomethyl [C2]; 1xTMT6plex [K7]; 1xTMT6plex [N-Term]	0.00030973	4	4	20	P35580; P35749; P35579; Q7Z406	P35580 [822-828]; P35749 [822-828]; P35579 [815-821]; Q7Z406 [839-845]		0	1297.73	0.986	42.13	Shared	100	R.NCAAYLK.L
FALSE	[K].ITDVIIGFQACCR.[G]	2xCarbamidomethyl [C11; C12]; 1xTMT6plex [N-Term]	0.00030973	1	1	4	P35579	P35579 [779-791]		0	1781.92	0.87	41.85		100	K.ITDVIIGFQACCR.G
FALSE	[R].LTEMETLQSQLMAEK.[L]	1xTMT6plex [K15]; 1xTMT6plex [N-Term]	0.00030973	1	1	26	P35579	P35579 [868-882]		0	2210.18	1.068	47.03		100	R.LTEMETLQSQLMAEK.L
FALSE	[R].LTEMETLQSQLMAEK.[L]	1xOxidation [M]; 1xTMT6plex [K15]; 1xTMT6plex [N-Term]	0.00030973	1	1	215	P35579	P35579 [868-882]		0	2226.18	1.07	36.68		100	R.LTEMETLQSQLMAEK.L
FALSE	[R].LTEMETLQSQLMAEK.[L]	2xOxidation [M4; M12]; 1xTMT6plex [K15]; 1xTMT6plex [N-Term]	0.00030973	1	1	229	P35579	P35579 [868-882]		0	2242.17	1.056	30.88		100	R.LTEMETLQSQLMAEK.L
FALSE	[K].LQVELDNVTGLLSQSDSK.[S]	1xTMT6plex [K18]; 1xTMT6plex [N-Term]	0.00030973	1	1	80	P35579	P35579 [1278-1295]		0	2404.33	1.036	45.33		100	K.LQVELDNVTGLLSQSDSK.S
FALSE	[K].LRLEVNLQAMK.[A]	1xTMT6plex [K11]; 1xTMT6plex [N-Term]	0.00030973	1	1	3	P35579	P35579 [1556-1566]		1	1773.08	0.914	21.12		100	K.LRLEVNLQAMK.A
FALSE	[R].QEEEMMAK.[E]	1xTMT6plex [K8]; 1xTMT6plex [N-Term]	0.00030973	1	1	25	P35579	P35579 [843-850]		0	1453.74	1.019	35.77		100	R.QEEEMMAK.E
FALSE	[R].QEEEMMAK.[E]	1xOxidation [M]; 1xTMT6plex [K8]; 1xTMT6plex [N-Term]	0.00030973	1	1	99	P35579	P35579 [843-850]		0	1469.74	1.03	37.24		100	R.QEEEMMAK.E
FALSE	[K].QELEEICHDLEAR.[V]	1xCarbamidomethyl [C7]; 1xTMT6plex [N-Term]	0.00030973	1	1	9	P35579	P35579 [911-923]		0	1870.92	1.03	24.37		100	K.QELEEICHDLEAR.V
FALSE	[KR].QLLQANPILEAFGNAK.[T]	1xTMT6plex [K16]; 1xTMT6plex [N-Term]	0.00030973	3	3	24	P35749; P35579; Q7Z406	P35749 [217-232]; P35579 [210-225]; Q7Z406 [237-252]		0	2185.27	1.089	15.13	Shared	100	R.QLLQANPILEAFGNAK.T
FALSE	[K].QIATLHAQVADMK.[K]	1xTMT6plex [K13]; 1xTMT6plex [N-Term]	0.00030973	1	1	39	P35579	P35579 [1358-1370]		0	1884.08	0.949	39.05		100	K.QIATLHAQVADMK.K
FALSE	[K].QIATLHAQVADMK.[K]	1xOxidation [M12]; 1xTMT6plex [K13]; 1xTMT6plex [N-Term]	0.00030973	1	1	113	P35579	P35579 [1358-1370]		0	1900.07	0.993	30.4		100	K.QIATLHAQVADMK.K
FALSE	[R].QLEEAEEEAQR.[A]	1xTMT6plex [N-Term]	0.00030973	1	1	8	P35579	P35579 [1878-1888]		0	1560.77	0.998	28.17		100	R.QLEEAEEEAQR.A
FALSE	[K].NMDPLNDNIATLLHQSSDK.[F]	1xOxidation [M2]; 1xTMT6plex [K19]; 1xTMT6plex [N-Term]	0.00030973	1	1	16	P35579	P35579 [588-606]		0	2600.34	1.085	41.29		100	K.NMDPLNDNIATLLHQSSDK.F
FALSE	[K].NMDPLNDNIATLLHQSSDK.[F]	1xTMT6plex [K19]; 1xTMT6plex [N-Term]	0.00030973	1	1	3	P35579	P35579 [588-606]		0	2584.34	0.973	32.95		100	K.NMDPLNDNIATLLHQSSDK.F
FALSE	[K].NLPIYSEEIVEMYK.[G]	1xTMT6plex [K14]; 1xTMT6plex [N-Term]	0.00030973	1	1	13	P35579	P35579 [126-139]		0	2186.18	1.099	48.65		100	K.NLPIYSEEIVEMYK.G
FALSE	[K].NLPIYSEEIVEMYK.[G]	1xOxidation [M12]; 1xTMT6plex [K14]; 1xTMT6plex [N-Term]	0.00030973	1	1	24	P35579	P35579 [126-139]		0	2202.18	1.074	43.25		100	K.NLPIYSEEIVEMYK.G
FALSE	[K].QACVLMIK.[A]	1xCarbamidomethyl [C3]; 1xTMT6plex [K8]; 1xTMT6plex [N-Term]	0.00030973	1	1	3	P35579	P35579 [738-745]		0	1420.84	0.933	46.97		100	K.QACVLMIK.A
FALSE	[R].QAQQERDELADEIANSSGK.[G]	1xTMT6plex [K19]; 1xTMT6plex [N-Term]	0.00030973	1	1	119	P35579	P35579 [1698-1716]		1	2547.31	0.991	35.62		100	R.QAQQERDELADEIANSSGK.G
FALSE	[R].NTDQASMPDNTAAQK.[V]	1xTMT6plex [K15]; 1xTMT6plex [N-Term]	0.00030973	2	2	71	P35749; P35579	P35749 [366-380]; P35579 [359-373]		0	2050.03	0.975	38.71	Shared	100	R.NTDQASMPDNTAAQK.V
FALSE	[R].NTDQASMPDNTAAQK.[V]	1xOxidation [M7]; 1xTMT6plex [K15]; 1xTMT6plex [N-Term]	0.00030973	2	2	251	P35749; P35579	P35749 [366-380]; P35579 [359-373]		0	2066.02	0.954	37.61	Shared	100	R.NTDQASMPDNTAAQK.V
FALSE	[R].NTNPNFVR.[C]	1xTMT6plex [N-Term]	0.00030973	2	2	29	P35580; P35579	P35580 [670-677]; P35579 [663-670]		0	1190.65	0.966	33.23	Shared	100	R.NTNPNFVR.C
FALSE	[K].LQQLFNHTMFILEQEEYQR.[E]	1xOxidation [M9]; 1xTMT6plex [N-Term]	0.00030973	3	3	6	P35580; P35749; P35579	P35580 [483-501]; P35749 [483-501]; P35579 [476-494]		0	2712.37	1.015	35.78	Shared	100	K.LQQLFNHTMFILEQEEYQR.E
FALSE	[R].IAQLEEELEEEQGNTELINDR.[L]	1xTMT6plex [N-Term]	0.00030973	1	1	96	P35579	P35579 [1731-1751]		0	2701.34	0.654	25.31		100	R.IAQLEEELEEEQGNTELINDR.L
FALSE	[K].IAQLEEQLDNETK.[E]	1xTMT6plex [K13]; 1xTMT6plex [N-Term]	0.00030973	1	1	111	P35579	P35579 [1816-1828]		0	1989.09	1.023	37.53		100	K.IAQLEEQLDNETK.E
FALSE	[K].LEGDSTDLSDQIAELQAQIAELK.[M]	1xTMT6plex [K23]; 1xTMT6plex [N-Term]	0.00030973	1	1	21	P35579	P35579 [1053-1075]		0	2945.57	1.107	44.75		100	K.LEGDSTDLSDQIAELQAQIAELK.M
FALSE	[R].LEVNLQAMK.[A]	1xTMT6plex [K9]; 1xTMT6plex [N-Term]	0.00030973	1	1	24	P35579	P35579 [1558-1566]		0	1503.9	1.11	39.86		100	R.LEVNLQAMK.A
FALSE	[R].LEVNLQAMK.[A]	1xOxidation [M8]; 1xTMT6plex [K9]; 1xTMT6plex [N-Term]	0.00030973	1	1	131	P35579	P35579 [1558-1566]		0	1519.89	1.134	31.09		100	R.LEVNLQAMK.A
FALSE	[K].LEEEQIILEDQNCK.[L]	1xCarbamidomethyl [C13]; 1xTMT6plex [K14]; 1xTMT6plex [N-Term]	0.00030973	1	1	32	P35579	P35579 [976-989]		0	2219.16	1.094	26.9		100	K.LEEEQIILEDQNCK.L
FALSE	[K].LDPHLVLDQLR.[C]	1xTMT6plex [N-Term]	0.00030973	2	2	66	P35580; P35579	P35580 [690-700]; P35579 [683-693]		0	1547.91	0.976	32.63	Shared	100	K.LDPHLVLDQLR.C
FALSE	[KR].KEEELQAALAR.[LVA]	1xTMT6plex [K1]; 1xTMT6plex [N-Term]	0.00030973	3	3	44	P35749; P35579; Q7Z406	P35749 [1088-1098]; P35579 [1081-1091]; Q7Z406 [1105-1115]		1	1716.01	0.975	35.31	Shared	100	K.KEEELQAALAR.V
FALSE	[KR].KFDQLLAEEK.[SNTA]	2xTMT6plex [K1; K10]; 1xTMT6plex [N-Term]	0.00030973	4	4	107	P35580; P35749; P35579; Q7Z406	P35580 [1452-1461]; P35749 [1452-1461]; P35579 [1445-1454]; Q7Z406 [1469-1478]		1	1908.14	0.985	38.57	Shared	100	K.KFDQLLAEEK.T
FALSE	[R].KGAGDGSDEEVDGK.[A]	2xTMT6plex [K1; K14]; 1xTMT6plex [N-Term]	0.00030973	1	1	4	P35579	P35579 [1937-1950]		1	2051.09	0.9	29		100	R.KGAGDGSDEEVDGK.A
FALSE	[R].HEMPPHIYAITDTAYR.[S]	1xOxidation [M3]; 1xTMT6plex [N-Term]	0.00030973	1	1	27	P35579	P35579 [144-159]		0	2160.07	0.992	8.03		100	R.HEMPPHIYAITDTAYR.S
FALSE	[K].HSQAVEELAEQLEQTK.[R]	1xTMT6plex [K16]; 1xTMT6plex [N-Term]	0.00030973	1	1	109	P35579	P35579 [1194-1209]		0	2298.23	1.127	31.61		100	K.HSQAVEELAEQLEQTK.R
FALSE	[K].HSQAVEELAEQLEQTKR.[V]	1xTMT6plex [K16]; 1xTMT6plex [N-Term]	0.00030973	1	1	1	P35579	P35579 [1194-1210]		1	2454.34	0.82	3.52		100	K.HSQAVEELAEQLEQTKR.V
FALSE	[K].KLEEEQIILEDQNCK.[L]	1xCarbamidomethyl [C14]; 2xTMT6plex [K1; K15]; 1xTMT6plex [N-Term]	0.00030973	1	1	116	P35579	P35579 [975-989]		1	2576.42	1.029	37.12		100	K.KLEEEQIILEDQNCK.L
FALSE	[R].KLEGDSTDLSDQIAELQAQIAELK.[M]	2xTMT6plex [K1; K24]; 1xTMT6plex [N-Term]	0.00030973	1	1	16	P35579	P35579 [1052-1075]		1	3302.83	1.044	47.36		100	R.KLEGDSTDLSDQIAELQAQIAELK.M
FALSE	[K].KLEMDLK.[D]	2xTMT6plex [K1; K7]; 1xTMT6plex [N-Term]	0.00030973	1	1	20	P35579	P35579 [1614-1620]		1	1563.97	0.975	40.58		100	K.KLEMDLK.D
FALSE	[K].KVEAQLQELQVK.[F]	2xTMT6plex [K1; K12]; 1xTMT6plex [N-Term]	0.00030973	1	1	40	P35579	P35579 [1249-1260]		1	2100.3	0.982	38.66		100	K.KVEAQLQELQVK.F
FALSE	[R].IAEFTTNLTEEEEK.[S]	1xTMT6plex [K14]; 1xTMT6plex [N-Term]	0.00030973	1	1	233	P35579	P35579 [1001-1014]		0	2112.11	1.094	31.52		100	R.IAEFTTNLTEEEEK.S
FALSE	[K].KMEDSVGCLETAEEVK.[R]	1xCarbamidomethyl [C8]; 2xTMT6plex [K1; K16]; 1xTMT6plex [N-Term]	0.00030973	1	1	35	P35579	P35579 [1372-1387]		1	2512.32	0.954	47.02		100	K.KMEDSVGCLETAEEVK.R
FALSE	[K].KMEDSVGCLETAEEVK.[R]	1xCarbamidomethyl [C8]; 1xOxidation [M2]; 2xTMT6plex [K1; K16]; 1xTMT6plex [N-Term]	0.00030973	1	1	110	P35579	P35579 [1372-1387]		1	2528.32	0.974	42.22		100	K.KMEDSVGCLETAEEVK.R
FALSE	[K].KMEDSVGCLETAEEVKR.[K]	1xCarbamidomethyl [C8]; 2xTMT6plex [K1; K16]; 1xTMT6plex [N-Term]	0.00030973	1	1	2	P35579	P35579 [1372-1388]		2	2668.43	0.806	52.73		100	K.KMEDSVGCLETAEEVKR.K
FALSE	[K].KMEDSVGCLETAEEVKR.[K]	1xCarbamidomethyl [C8]; 1xOxidation [M2]; 2xTMT6plex [K1; K16]; 1xTMT6plex [N-Term]	0.00030973	1	1	1	P35579	P35579 [1372-1388]		2	2684.42	0.921	39.81		100	K.KMEDSVGCLETAEEVKR.K
FALSE	[K].KQELEEICHDLEAR.[V]	1xCarbamidomethyl [C8]; 1xTMT6plex [K1]; 1xTMT6plex [N-Term]	0.00030973	1	1	52	P35579	P35579 [910-923]		1	2228.17	1.039	31.77		100	K.KQELEEICHDLEAR.V
FALSE	[R].IMGIPEEEQMGLLR.[V]	1xTMT6plex [N-Term]	0.00030973	1	1	11	P35579	P35579 [328-341]		0	1844.98	0.971	41.84		100	R.IMGIPEEEQMGLLR.V
FALSE	[R].IMGIPEEEQMGLLR.[V]	1xOxidation [M]; 1xTMT6plex [N-Term]	0.00030973	1	1	122	P35579	P35579 [328-341]		0	1860.98	1.027	39.96		100	R.IMGIPEEEQMGLLR.V
FALSE	[R].IMGIPEEEQMGLLR.[V]	2xOxidation [M2; M10]; 1xTMT6plex [N-Term]	0.00030973	1	1	188	P35579	P35579 [328-341]		0	1876.97	1.015	28.63		100	R.IMGIPEEEQMGLLR.V
FALSE	[R].INFDVNGYIVGANIETYLLEK.[S]	1xTMT6plex [K21]; 1xTMT6plex [N-Term]	0.00030973	1	1	6	P35579	P35579 [241-261]		0	2843.56	1.144	35.79		100	R.INFDVNGYIVGANIETYLLEK.S
FALSE	[K].LQLQEQLQAETELCAEAEELR.[A]	1xCarbamidomethyl [C14]; 1xTMT6plex [N-Term]	0.00030973	1	1	133	P35579	P35579 [883-903]		0	2730.38	1.02	18.27		100	K.LQLQEQLQAETELCAEAEELR.A
FALSE	[R].LQQELDDLLVDLDHQR.[Q]	1xTMT6plex [N-Term]	0.00030973	1	1	49	P35579	P35579 [1418-1433]		0	2179.16	1.05	21.64		100	R.LQQELDDLLVDLDHQR.Q
FALSE	[K].LQQLFNHTMFILEQEEYQR.[E]	1xTMT6plex [N-Term]	0.00030973	3	3	3	P35580; P35749; P35579	P35580 [483-501]; P35749 [483-501]; P35579 [476-494]		0	2696.37	1.201	6.87	Shared	100	K.LQQLFNHTMFILEQEEYQR.E
FALSE	[K].LQEMEGTVK.[S]	1xTMT6plex [K9]; 1xTMT6plex [N-Term]	0.00030973	1	1	42	P35579	P35579 [1794-1802]		0	1492.84	0.981	37.1		100	K.LQEMEGTVK.S
FALSE	[R].IIGLDQVAGMSETALPGAFK.[T]	1xTMT6plex [K20]; 1xTMT6plex [N-Term]	0.00030973	1	1	34	P35579	P35579 [618-637]		0	2476.39	1.057	37.31		100	R.IIGLDQVAGMSETALPGAFK.T
FALSE	[R].HEMPPHIYAITDTAYR.[S]	1xTMT6plex [N-Term]	0.00030973	1	1	15	P35579	P35579 [144-159]		0	2144.08	1.004	8.43		100	R.HEMPPHIYAITDTAYR.S
FALSE	[K].VEAQLQELQVK.[F]	1xTMT6plex [K11]; 1xTMT6plex [N-Term]	0.00030973	1	1	35	P35579	P35579 [1250-1260]		0	1743.04	1.078	33.08		100	K.VEAQLQELQVK.F
FALSE	[K].VEDMAELTCLNEASVLHNLK.[DE]	1xCarbamidomethyl [C9]; 1xTMT6plex [K20]; 1xTMT6plex [N-Term]	0.00030973	2	2	7	P35580; P35579	P35580 [87-106]; P35579 [83-102]		0	2744.44	1.151	42.19	Shared	100	K.VEDMAELTCLNEASVLHNLK.E
FALSE	[R].VEEEAAQK.[N]	1xTMT6plex [K8]; 1xTMT6plex [N-Term]	0.00030973	1	1	30	P35579	P35579 [1092-1099]		0	1361.77	1.068	26.15		100	R.VEEEAAQK.N
FALSE	[K].VEDMAELTCLNEASVLHNLK.[DE]	1xCarbamidomethyl [C9]; 1xOxidation [M4]; 1xTMT6plex [K20]; 1xTMT6plex [N-Term]	0.00030973	2	2	19	P35580; P35579	P35580 [87-106]; P35579 [83-102]		0	2760.43	1.072	31.58	Shared	100	K.VEDMAELTCLNEASVLHNLK.E
FALSE	[RK].TQLEELEDELQATEDAK.[L]	1xTMT6plex [K17]; 1xTMT6plex [N-Term]	0.00030973	3	3	87	P35580; P35749; P35579	P35580 [1546-1562]; P35749 [1546-1562]; P35579 [1539-1555]		0	2420.24	1.028	34.54	Shared	100	K.TQLEELEDELQATEDAK.L
FALSE	[RK].TQLEELEDELQATEDAKLR.[L]	1xTMT6plex [K17]; 1xTMT6plex [N-Term]	0.00030973	3	3	1	P35580; P35749; P35579	P35580 [1546-1564]; P35749 [1546-1564]; P35579 [1539-1557]		1	2689.43	1.207	25.57	Shared	100	K.TQLEELEDELQATEDAKLR.L
FALSE	[K].VSHLLGINVTDFTR.[G]	1xTMT6plex [N-Term]	0.00030973	1	1	14	P35579	P35579 [374-387]		0	1801.02	1.076	22.49		100	K.VSHLLGINVTDFTR.G
FALSE	[R].YEILTPNSIPK.[G]	1xTMT6plex [K11]; 1xTMT6plex [N-Term]	0.00030973	1	1	36	P35579	P35579 [721-731]		0	1733.02	0.986	38.57		100	R.YEILTPNSIPK.G
FALSE	[K].VKPLLQVSR.[Q]	1xTMT6plex [K2]; 1xTMT6plex [N-Term]	0.00030973	1	1	4	P35579	P35579 [834-842]		0	1497.99	0.761	46.52		100	K.VKPLLQVSR.Q
FALSE	[K].VIQYLAYVASSHK.[S]	1xTMT6plex [K13]; 1xTMT6plex [N-Term]	0.00030973	1	1	1	P35579	P35579 [187-199]		0	1937.13	1.008	14.89		100	K.VIQYLAYVASSHK.S
FALSE	[R].VISGVLQLGNIVFK.[K]	1xTMT6plex [K14]; 1xTMT6plex [N-Term]	0.00030973	1	1	8	P35579	P35579 [342-355]		0	1945.23	1.27	26.96		100	R.VISGVLQLGNIVFK.K
FALSE	[R].VISGVLQLGNIVFKK.[E]	2xTMT6plex [K14; K15]; 1xTMT6plex [N-Term]	0.00030973	1	1	2	P35579	P35579 [342-356]		1	2302.48	0.58	26.25		100	R.VISGVLQLGNIVFKK.E
FALSE	[K].VMQEQGTHPK.[F]	1xTMT6plex [K10]; 1xTMT6plex [N-Term]	0.00030973	1	1	24	P35579	P35579 [546-555]		0	1612.89	0.87	38.5		100	K.VMQEQGTHPK.F
FALSE	[K].VMQEQGTHPK.[F]	1xOxidation [M2]; 1xTMT6plex [K10]; 1xTMT6plex [N-Term]	0.00030973	1	1	137	P35579	P35579 [546-555]		0	1628.88	0.969	29.27		100	K.VMQEQGTHPK.F
FALSE	[K].RQAQQERDELADEIANSSGK.[G]	1xTMT6plex [K20]; 1xTMT6plex [N-Term]	0.00030973	1	1	10	P35579	P35579 [1697-1716]		2	2703.41	0.837	49.06		100	K.RQAQQERDELADEIANSSGK.G
FALSE	[K].RQLEEAEEEAQR.[A]	1xTMT6plex [N-Term]	0.00030973	1	1	26	P35579	P35579 [1877-1888]		1	1716.87	0.935	25.53		100	K.RQLEEAEEEAQR.A
FALSE	[K].RQQQLTAMK.[V]	1xTMT6plex [K9]; 1xTMT6plex [N-Term]	0.00030973	2	2	7	P35749; P35579	P35749 [809-817]; P35579 [802-810]		1	1561.92	0.83	40.08	Shared	100	K.RQQQLTAMK.V
FALSE	[K].RQQQLTAMK.[V]	1xOxidation [M8]; 1xTMT6plex [K9]; 1xTMT6plex [N-Term]	0.00030973	2	2	18	P35749; P35579	P35749 [809-817]; P35579 [802-810]		1	1577.92	0.969	30.09	Shared	100	K.RQQQLTAMK.V
FALSE	[K].SGFEPASLK.[E]	1xTMT6plex [K9]; 1xTMT6plex [N-Term]	0.00030973	1	1	44	P35579	P35579 [39-47]		0	1393.81	1.033	31.91		100	K.SGFEPASLK.E
FALSE	[R].QRYEILTPNSIPK.[G]	1xTMT6plex [K13]; 1xTMT6plex [N-Term]	0.00030973	1	1	4	P35579	P35579 [719-731]		1	2017.18	0.667	65.3		100	R.QRYEILTPNSIPK.G
FALSE	[R].QSACNLEK.[K]	1xCarbamidomethyl [C4]; 1xTMT6plex [K8]; 1xTMT6plex [N-Term]	0.00030973	1	1	30	P35579	P35579 [1434-1441]		0	1407.77	0.963	37.39		100	R.QSACNLEK.K
FALSE	[K].QTLENERGELANEVK.[V]	1xTMT6plex [K15]; 1xTMT6plex [N-Term]	0.00030973	1	1	52	P35579	P35579 [1220-1234]		1	2188.2	0.933	36.25		100	K.QTLENERGELANEVK.V
FALSE	[R].QQQLTAMK.[V]	1xTMT6plex [K8]; 1xTMT6plex [N-Term]	0.00030973	2	2	19	P35749; P35579	P35749 [810-817]; P35579 [803-810]		0	1405.82	0.982	37.56	Shared	100	R.QQQLTAMK.V
FALSE	[R].QQQLTAMK.[V]	1xOxidation [M7]; 1xTMT6plex [K8]; 1xTMT6plex [N-Term]	0.00030973	2	2	72	P35749; P35579	P35749 [810-817]; P35579 [803-810]		0	1421.82	1.013	34.78	Shared	100	R.QQQLTAMK.V
FALSE	[K].RALEQQVEEMK.[T]	1xTMT6plex [K11]; 1xTMT6plex [N-Term]	0.00030973	1	1	4	P35579	P35579 [1528-1538]		1	1819.01	0.856	57.04		100	K.RALEQQVEEMK.T
FALSE	[K].RDLGEELEALK.[T]	1xTMT6plex [K11]; 1xTMT6plex [N-Term]	0.00030973	2	2	8	P35749; P35579	P35749 [1142-1152]; P35579 [1135-1145]		1	1731.01	1.111	29.48	Shared	100	K.RDLGEELEALK.T
FALSE	[K].REQEVNILK.[K]	1xTMT6plex [K9]; 1xTMT6plex [N-Term]	0.00030973	1	1	22	P35579	P35579 [1165-1173]		1	1586.96	1.002	26.66		100	K.REQEVNILK.K
FALSE	[K].RHEMPPHIYAITDTAYR.[S]	1xOxidation [M4]; 1xTMT6plex [N-Term]	0.00030973	1	1	6	P35579	P35579 [143-159]		1	2316.18	1.065	18.01		100	K.RHEMPPHIYAITDTAYR.S
FALSE	[R].RGDLPFVVPR.[R]	1xTMT6plex [N-Term]	0.00030973	1	1	24	P35579	P35579 [1923-1932]		1	1384.83	1.032	2.31		100	R.RGDLPFVVPR.R
FALSE	[K].THEAQIQEMR.[Q]	1xTMT6plex [N-Term]	0.00030973	1	1	45	P35579	P35579 [1182-1191]		0	1471.75	0.984	33.31		100	K.THEAQIQEMR.Q
FALSE	[K].THEAQIQEMR.[Q]	1xOxidation [M9]; 1xTMT6plex [N-Term]	0.00030973	1	1	146	P35579	P35579 [1182-1191]		0	1487.75	1.093	11		100	K.THEAQIQEMR.Q
FALSE	[K].TDLLLEPYNK.[Y]	1xTMT6plex [K10]; 1xTMT6plex [N-Term]	0.00030973	1	1	66	P35579	P35579 [290-299]		0	1663.97	1.01	40.23		100	K.TDLLLEPYNK.Y
FALSE	[K].TELEDTLDSTAAQQELR.[S]	1xTMT6plex [N-Term]	0.00030973	1	1	125	P35579	P35579 [1146-1162]		0	2149.08	1.077	29.15		100	K.TELEDTLDSTAAQQELR.S
FALSE	[R].TEMEDLMSSK.[D]	1xTMT6plex [K10]; 1xTMT6plex [N-Term]	0.00030973	1	1	38	P35579	P35579 [1504-1513]		0	1628.83	0.988	39.49		100	R.TEMEDLMSSK.D
FALSE	[R].TEMEDLMSSK.[D]	1xOxidation [M]; 1xTMT6plex [K10]; 1xTMT6plex [N-Term]	0.00030973	1	1	193	P35579	P35579 [1504-1513]		0	1644.82	1.004	34.68		100	R.TEMEDLMSSK.D
FALSE	[R].TEMEDLMSSK.[D]	2xOxidation [M3; M7]; 1xTMT6plex [K10]; 1xTMT6plex [N-Term]	0.00030973	1	1	150	P35579	P35579 [1504-1513]		0	1660.82	1.029	31.45		100	R.TEMEDLMSSK.D
FALSE	[K].SMEAEMIQLQEELAAAER.[A]	1xTMT6plex [N-Term]	0.00030973	1	1	58	P35579	P35579 [1677-1694]		0	2278.13	1.108	33.67		100	K.SMEAEMIQLQEELAAAER.A
FALSE	[K].SMEAEMIQLQEELAAAER.[A]	1xOxidation [M]; 1xTMT6plex [N-Term]	0.00030973	1	1	203	P35579	P35579 [1677-1694]		0	2294.12	1.071	26.01		100	K.SMEAEMIQLQEELAAAER.A
FALSE	[K].SMEAEMIQLQEELAAAER.[A]	2xOxidation [M2; M6]; 1xTMT6plex [N-Term]	0.00030973	1	1	304	P35579	P35579 [1677-1694]		0	2310.12	1.023	16.76		100	K.SMEAEMIQLQEELAAAER.A
FALSE	[R].SMMQDREDQSILCTGESGAGK.[T]	1xCarbamidomethyl [C13]; 1xTMT6plex [K21]; 1xTMT6plex [N-Term]	0.00030973	1	1	18	P35579	P35579 [160-180]		1	2758.32	0.862	49.7		100	R.SMMQDREDQSILCTGESGAGK.T
FALSE	[R].SMMQDREDQSILCTGESGAGK.[T]	1xCarbamidomethyl [C13]; 1xOxidation [M]; 1xTMT6plex [K21]; 1xTMT6plex [N-Term]	0.00030973	1	1	118	P35579	P35579 [160-180]		1	2774.32	0.875	42.72		100	R.SMMQDREDQSILCTGESGAGK.T
FALSE	[R].SMMQDREDQSILCTGESGAGK.[T]	1xCarbamidomethyl [C13]; 2xOxidation [M2; M3]; 1xTMT6plex [K21]; 1xTMT6plex [N-Term]	0.00030973	1	1	108	P35579	P35579 [160-180]		1	2790.31	0.922	37.82		100	R.SMMQDREDQSILCTGESGAGK.T
FALSE	[R].IIGLDQVAGMSETALPGAFK.[T]	1xOxidation [M10]; 1xTMT6plex [K20]; 1xTMT6plex [N-Term]	0.00030973	1	1	36	P35579	P35579 [618-637]		0	2492.38	1.066	38.41		100	R.IIGLDQVAGMSETALPGAFK.T
FALSE	[K].HEAMITDLEER.[L]	1xOxidation [M4]; 1xTMT6plex [N-Term]	0.00030973	1	1	203	P35579	P35579 [1025-1035]		0	1588.78	0.962	18.04		100	K.HEAMITDLEER.L
FALSE	[K].DVLLQVDDERR.[N]	1xTMT6plex [N-Term]	0.00030973	1	1	134	P35579	P35579 [1846-1856]		1	1586.87	1.003	20.49		100	K.DVLLQVDDERR.N
FALSE	[K].DVLLQVDDER.[R]	1xTMT6plex [N-Term]	0.00030973	1	1	18	P35579	P35579 [1846-1855]		0	1430.77	1.008	31.33		100	K.DVLLQVDDER.R
FALSE	[R].ALEQQVEEMK.[T]	1xOxidation [M9]; 1xTMT6plex [K10]; 1xTMT6plex [N-Term]	0.00030973	1	1	286	P35579	P35579 [1529-1538]		0	1678.91	1.007	32.07		100	R.ALEQQVEEMK.T
FALSE	[R].ALEQQVEEMK.[T]	1xTMT6plex [K10]; 1xTMT6plex [N-Term]	0.00030973	1	1	51	P35579	P35579 [1529-1538]		0	1662.91	1.029	36.45		100	R.ALEQQVEEMK.T
FALSE	[K].FDQLLAEEK.[SNTA]	1xTMT6plex [K9]; 1xTMT6plex [N-Term]	0.00030973	4	4	23	P35580; P35749; P35579; Q7Z406	P35580 [1453-1461]; P35749 [1453-1461]; P35579 [1446-1454]; Q7Z406 [1470-1478]		0	1550.88	1.047	32.1	Shared	100	K.FDQLLAEEK.T
FALSE	[K].ALELDSNLYR.[I]	1xTMT6plex [N-Term]	0.00030973	1	1	57	P35579	P35579 [746-755]		0	1422.78	1.008	37.67		100	K.ALELDSNLYR.I
FALSE	[R].FLSNGHVTIPGQQDK.[D]	1xTMT6plex [K15]; 1xTMT6plex [N-Term]	0.00030973	1	1	6	P35579	P35579 [302-316]		0	2099.16	1.009	18.42		100	R.FLSNGHVTIPGQQDK.D
FALSE	[R].AGVLAHLEEERDLK.[I]	1xTMT6plex [K14]; 1xTMT6plex [N-Term]	0.00030973	2	2	10	P35580; P35579	P35580 [772-785]; P35579 [765-778]		1	2038.17	0.717	18.94	Shared	100	R.AGVLAHLEEERDLK.I
FALSE	[R].AGVLAHLEEER.[D]	1xTMT6plex [N-Term]	0.00030973	2	2	140	P35580; P35579	P35580 [772-782]; P35579 [765-775]		0	1452.8	1.012	30.76	Shared	100	R.AGVLAHLEEER.D
FALSE	[R].ALEEAMEQK.[A]	1xOxidation [M6]; 1xTMT6plex [K9]; 1xTMT6plex [N-Term]	0.00030973	1	1	322	P35579	P35579 [1484-1492]		0	1522.82	0.992	32.29		100	R.ALEEAMEQK.A
FALSE	[R].ALEEAMEQK.[A]	1xTMT6plex [K9]; 1xTMT6plex [N-Term]	0.00030973	1	1	76	P35579	P35579 [1484-1492]		0	1506.82	1.004	36.41		100	R.ALEEAMEQK.A
FALSE	[R].EEILAQAK.[E]	1xTMT6plex [K8]; 1xTMT6plex [N-Term]	0.00030973	1	1	39	P35579	P35579 [1662-1669]		0	1359.82	1.089	25.17		100	R.EEILAQAK.E
FALSE	[R].ELESQISELQEDLESER.[A]	1xTMT6plex [N-Term]	0.00030973	1	1	66	P35579	P35579 [1108-1124]		0	2263.11	1.138	29.57		100	R.ELESQISELQEDLESER.A
FALSE	[K].ASITALEAK.[I]	1xTMT6plex [K9]; 1xTMT6plex [N-Term]	0.00030973	1	1	49	P35579	P35579 [1807-1815]		0	1361.84	1	35.79		100	K.ASITALEAK.I
FALSE	[R].EDQSILCTGESGAGK.[T]	1xCarbamidomethyl [C7]; 1xTMT6plex [K15]; 1xTMT6plex [N-Term]	0.00030973	4	4	55	P35580; P35749; P35579; Q7Z406	P35580 [170-184]; P35749 [170-184]; P35579 [166-180]; Q7Z406 [190-204]		0	2010.02	1.119	31.96	Shared	100	R.EDQSILCTGESGAGK.T
FALSE	[K].EEELQAALAR.[LVA]	1xTMT6plex [N-Term]	0.00030973	3	3	20	P35749; P35579; Q7Z406	P35749 [1089-1098]; P35579 [1082-1091]; Q7Z406 [1106-1115]		0	1358.75	1.052	27.94	Shared	100	K.EEELQAALAR.V
FALSE	[R].ELEDATETADAMNR.[E]	1xOxidation [M12]; 1xTMT6plex [N-Term]	0.00030973	1	1	131	P35579	P35579 [1899-1912]		0	1810.83	1.002	33.27		100	R.ELEDATETADAMNR.E
FALSE	[K].EEVGEEAIVELVENGK.[K]	1xTMT6plex [K16]; 1xTMT6plex [N-Term]	0.00030973	1	1	141	P35579	P35579 [48-63]		0	2202.19	1.108	35		100	K.EEVGEEAIVELVENGK.K
FALSE	[R].ELEDATETADAMNR.[E]	1xTMT6plex [N-Term]	0.00030973	1	1	46	P35579	P35579 [1899-1912]		0	1794.84	0.972	34.2		100	R.ELEDATETADAMNR.E
FALSE	[R].EQLEEEEEAK.[H]	1xTMT6plex [K10]; 1xTMT6plex [N-Term]	0.00030973	1	1	11	P35579	P35579 [1343-1352]		0	1691.87	0.949	32.89		100	R.EQLEEEEEAK.H
FALSE	[R].EQEVNILK.[K]	1xTMT6plex [K8]; 1xTMT6plex [N-Term]	0.00030973	1	1	36	P35579	P35579 [1166-1173]		0	1430.86	1.017	33.46		100	R.EQEVNILK.K
FALSE	[K].ERNTDQASMPDNTAAQK.[V]	1xTMT6plex [K17]; 1xTMT6plex [N-Term]	0.00030973	2	2	1	P35749; P35579	P35749 [364-380]; P35579 [357-373]		1	2335.17	1.204	33.4	Shared	100	K.ERNTDQASMPDNTAAQK.V
FALSE	[K].ERNTDQASMPDNTAAQK.[V]	1xOxidation [M9]; 1xTMT6plex [K17]; 1xTMT6plex [N-Term]	0.00030973	2	2	1	P35749; P35579	P35749 [364-380]; P35579 [357-373]		1	2351.17	1.09	4.74	Shared	100	K.ERNTDQASMPDNTAAQK.V
FALSE	[K].EQADFAIEALAK.[A]	1xTMT6plex [K12]; 1xTMT6plex [N-Term]	0.00030973	2	2	374	P35579; Q7Z406	P35579 [408-419]; Q7Z406 [434-445]		0	1763.99	1.039	24.37	Shared	100	K.EQADFAIEALAK.A
FALSE	[R].ASREEILAQAK.[E]	1xTMT6plex [K11]; 1xTMT6plex [N-Term]	0.00030973	1	1	12	P35579	P35579 [1659-1669]		1	1674	0.731	45.02		100	R.ASREEILAQAK.E
FALSE	[R].EMEAELEDER.[K]	1xTMT6plex [N-Term]	0.00030973	1	1	1	P35579	P35579 [1593-1602]		0	1479.68	0.999	34.81		100	R.EMEAELEDER.K
FALSE	[R].EMEAELEDERK.[Q]	1xTMT6plex [K11]; 1xTMT6plex [N-Term]	0.00030973	1	1	22	P35579	P35579 [1593-1603]		1	1836.94	1.034	27.31		100	R.EMEAELEDERK.Q
FALSE	[R].EMEAELEDERK.[Q]	1xOxidation [M2]; 1xTMT6plex [K11]; 1xTMT6plex [N-Term]	0.00030973	1	1	53	P35579	P35579 [1593-1603]		1	1852.94	1.037	30.42		100	R.EMEAELEDERK.Q
FALSE	[K].ANLQIDQINTDLNLER.[S]	1xTMT6plex [N-Term]	0.00030973	1	1	137	P35579	P35579 [1755-1770]		0	2099.13	1.044	24.43		100	K.ANLQIDQINTDLNLER.S
FALSE	[K].EEVGEEAIVELVENGKK.[V]	2xTMT6plex [K16; K17]; 1xTMT6plex [N-Term]	0.00030973	1	1	18	P35579	P35579 [48-64]		1	2559.45	0.91	46.26		100	K.EEVGEEAIVELVENGKK.V
FALSE	[K].DFSALESQLQDTQELLQEENR.[Q]	1xTMT6plex [N-Term]	0.00030973	1	1	74	P35579	P35579 [1302-1322]		0	2722.34	1.071	35.94		100	K.DFSALESQLQDTQELLQEENR.Q
FALSE	[K].ADFCIIHYAGK.[V]	1xCarbamidomethyl [C4]; 1xTMT6plex [K11]; 1xTMT6plex [N-Term]	0.00030973	2	2	24	P35580; P35579	P35580 [573-583]; P35579 [566-576]		0	1752.95	0.951	41.7	Shared	100	K.ADFCIIHYAGK.V
FALSE	[K].ADGAEAKPAE.[-]	1xTMT6plex [K7]; 1xTMT6plex [N-Term]	0.00030973	1	1	9	P35579	P35579 [1951-1960]		0	1416.77	0.75	52.78		100	K.ADGAEAKPAE.-
FALSE	[R].CQHLQAEK.[K]	1xCarbamidomethyl [C1]; 1xTMT6plex [K8]; 1xTMT6plex [N-Term]	0.00030973	1	1	24	P35579	P35579 [931-938]		0	1471.81	0.979	35.32		100	R.CQHLQAEK.K
FALSE	[K].DLEAHIDSANK.[N]	1xTMT6plex [K11]; 1xTMT6plex [N-Term]	0.00030973	1	1	23	P35579	P35579 [1621-1631]		0	1670.91	1.056	25		100	K.DLEAHIDSANK.N
FALSE	[R].CNGVLEGIR.[I]	1xCarbamidomethyl [C1]; 1xTMT6plex [N-Term]	0.00030973	4	13	27	P35580; P35749; P35579; Q7Z406	P35580 [701-709]; P35749 [701-709]; P35579 [694-702]; Q7Z406 [718-726]		0	1246.68	0.925	40.35	Shared	100	R.CNGVLEGIR.I
FALSE	[K].HEAMITDLEER.[L]	1xTMT6plex [N-Term]	0.00030973	1	1	55	P35579	P35579 [1025-1035]		0	1572.79	0.986	35.58		100	K.HEAMITDLEER.L
FALSE	[R].DELADEIANSSGK.[G]	1xTMT6plex [K13]; 1xTMT6plex [N-Term]	0.00030973	1	1	48	P35579	P35579 [1704-1716]		0	1806.95	0.989	36.17		100	R.DELADEIANSSGK.G
FALSE	[R].GDLPFVVPR.[R]	1xTMT6plex [N-Term]	0.00030973	1	1	27	P35579	P35579 [1924-1932]		0	1228.73	1.025	30.82		100	R.GDLPFVVPR.R
FALSE	[K].GALALEEK.[R]	1xTMT6plex [K8]; 1xTMT6plex [N-Term]	0.00030973	1	1	28	P35579	P35579 [1717-1724]		0	1288.79	0.992	35.61		100	K.GALALEEK.R
FALSE	[K].DMFQETMEAMR.[I]	3xOxidation [M2; M7; M10]; 1xTMT6plex [N-Term]	0.00030973	1	1	112	P35579	P35579 [317-327]		0	1665.71	1.048	27.44		100	K.DMFQETMEAMR.I
FALSE	[K].DMFQETMEAMR.[I]	1xTMT6plex [N-Term]	0.00030973	1	1	27	P35579	P35579 [317-327]		0	1617.73	1.048	44.75		100	K.DMFQETMEAMR.I
FALSE	[K].DMFQETMEAMR.[I]	1xOxidation [M]; 1xTMT6plex [N-Term]	0.00030973	1	1	180	P35579	P35579 [317-327]		0	1633.72	1.008	37.48		100	K.DMFQETMEAMR.I
FALSE	[K].DMFQETMEAMR.[I]	2xOxidation [M7; M]; 1xTMT6plex [N-Term]	0.00030973	1	1	327	P35579	P35579 [317-327]		0	1649.72	1.043	31.58		100	K.DMFQETMEAMR.I
FALSE	[K].DLEGLSQR.[H]	1xTMT6plex [N-Term]	0.00030973	1	1	62	P35579	P35579 [1393-1400]		0	1146.63	0.939	30.79		100	K.DLEGLSQR.H
FALSE	[R].DLGEELEALK.[T]	1xTMT6plex [K10]; 1xTMT6plex [N-Term]	0.00030973	2	2	44	P35749; P35579	P35749 [1143-1152]; P35579 [1136-1145]		0	1574.9	1.011	38.39	Shared	100	R.DLGEELEALK.T
FALSE	[R].CIIPNHEK.[RK]	1xCarbamidomethyl [C1]; 1xTMT6plex [K8]; 1xTMT6plex [N-Term]	0.00030973	3	3	37	P35580; P35749; P35579	P35580 [678-685]; P35749 [678-685]; P35579 [671-678]		0	1468.83	1	29.39	Shared	100	R.CIIPNHEK.K
FALSE	[K].GAGDGSDEEVDGK.[A]	1xTMT6plex [K13]; 1xTMT6plex [N-Term]	0.00030973	1	1	3	P35579	P35579 [1938-1950]		0	1693.83	0.996	21.32		100	K.GAGDGSDEEVDGK.A
FALSE	[R].DLQGRDEQSEEK.[K]	1xTMT6plex [K12]; 1xTMT6plex [N-Term]	0.00030973	1	1	17	P35579	P35579 [1572-1583]		1	1891.98	0.774	28.32		100	R.DLQGRDEQSEEK.K
FALSE	[R].GELANEVK.[V]	1xTMT6plex [K8]; 1xTMT6plex [N-Term]	0.00030973	1	1	41	P35579	P35579 [1227-1234]		0	1317.78	1.102	33.29		100	R.GELANEVK.V
FALSE	[K].SVHELEK.[S]	1xTMT6plex [K7]; 1xTMT6plex [N-Term]	0.000568404	1	1	25	P35579	P35579 [1519-1525]		0	1299.77	1.011	35.53		100	K.SVHELEK.S
FALSE	[R].DRAEAEAR.[E]	1xTMT6plex [N-Term]	0.000568404	3	3	1	P35580; P35749; P35579	P35580 [1472-1479]; P35749 [1472-1479]; P35579 [1465-1472]		1	1146.61	0.973	3.55	Shared	100	R.DRAEAEAR.E
FALSE	[K].QIATLHAQVADMKK.[K]	1xOxidation [M12]; 2xTMT6plex [K13; K14]; 1xTMT6plex [N-Term]	0.000568404	1	1	2	P35579	P35579 [1358-1371]		1	2257.33	0.973	31.64		100	K.QIATLHAQVADMKK.K
FALSE	[K].TLEEEAK.[T]	1xTMT6plex [K7]; 1xTMT6plex [N-Term]	0.000568404	1	1	26	P35579	P35579 [1175-1181]		0	1277.74	1.069	27.74		100	K.TLEEEAK.T
FALSE	[K].FVSELWK.[D]	1xTMT6plex [K7]; 1xTMT6plex [N-Term]	0.000568404	1	1	8	P35579	P35579 [607-613]		0	1366.81	1.075	34.13		100	K.FVSELWK.D
FALSE	[K].ITDVIIGFQACCRGYLAR.[K]	2xCarbamidomethyl [C11; C12]; 1xTMT6plex [N-Term]	0.000568404	1	1	2	P35579	P35579 [779-796]		1	2342.23	1.019	7.48		100	K.ITDVIIGFQACCRGYLAR.K
FALSE	[K].LQEMEGTVK.[S]	1xOxidation [M4]; 1xTMT6plex [K9]; 1xTMT6plex [N-Term]	0.000568404	1	1	154	P35579	P35579 [1794-1802]		0	1508.84	1.002	36.51		100	K.LQEMEGTVK.S
FALSE	[K].ADEWLMK.[N]	1xTMT6plex [K7]; 1xTMT6plex [N-Term]	0.000568404	2	2	27	P35580; P35579	P35580 [588-594]; P35579 [581-587]		0	1350.75	1.003	38.39	Shared	100	K.ADEWLMK.N
FALSE	[R].KLQAQMK.[D]	2xTMT6plex [K1; K7]; 1xTMT6plex [N-Term]	0.000568404	3	3	1	P35580; P35749; P35579	P35580 [1649-1655]; P35749 [1649-1655]; P35579 [1642-1648]		1	1533.98	0.77	50.21	Shared	100	R.KLQAQMK.D
FALSE	[K].NSFREQLEEEEEAK.[H]	1xTMT6plex [K14]; 1xTMT6plex [N-Term]	0.000568404	1	1	1	P35579	P35579 [1339-1352]		1	2196.12	1.062	7.21		100	K.NSFREQLEEEEEAK.H
FALSE	[K].NRDEAIK.[Q]	1xTMT6plex [K7]; 1xTMT6plex [N-Term]	0.000568404	1	1	27	P35579	P35579 [1632-1638]		1	1303.77	0.996	28.67		100	K.NRDEAIK.Q
FALSE	[K].LVWVPSDK.[S]	1xTMT6plex [K8]; 1xTMT6plex [N-Term]	0.000568404	1	1	10	P35579	P35579 [31-38]		0	1401.85	1.003	37.71		100	K.LVWVPSDK.S
FALSE	[K].QLAAENR.[L]	1xTMT6plex [N-Term]	0.0008677	1	1	45	P35579	P35579 [861-867]		0	1030.58	1.11	23.29		100	K.QLAAENR.L
FALSE	[K].LRLEVNLQAMK.[A]	1xOxidation [M10]; 1xTMT6plex [K11]; 1xTMT6plex [N-Term]	0.0008677	1	1	8	P35579	P35579 [1556-1566]		1	1789.08	0.87	15.9		100	K.LRLEVNLQAMK.A
FALSE	[R].QEEEMMAK.[E]	2xOxidation [M5; M6]; 1xTMT6plex [K8]; 1xTMT6plex [N-Term]	0.00115152	1	1	77	P35579	P35579 [843-850]		0	1485.73	1.032	31.49		100	R.QEEEMMAK.E
FALSE	[R].DEQSEEK.[K]	1xTMT6plex [K7]; 1xTMT6plex [N-Term]	0.00139174	1	1	3	P35579	P35579 [1577-1583]		0	1322.68	1.127	21.74		100	R.DEQSEEK.K
FALSE	[K].QACVLMIK.[A]	1xCarbamidomethyl [C3]; 1xOxidation [M6]; 1xTMT6plex [K8]; 1xTMT6plex [N-Term]	0.00139174	1	1	13	P35579	P35579 [738-745]		0	1436.84	0.933	45.74		100	K.QACVLMIK.A
FALSE	[R].QEEEMMAKEEELVK.[V]	2xOxidation [M5; M6]; 2xTMT6plex [K8; K14]; 1xTMT6plex [N-Term]	0.00139174	1	1	2	P35579	P35579 [843-856]		1	2442.27	0.722	50.2		100	R.QEEEMMAKEEELVK.V
FALSE	[K].QTLENER.[G]	1xTMT6plex [N-Term]	0.00139174	1	1	7	P35579	P35579 [1220-1226]		0	1118.6	1.099	28.15		100	K.QTLENER.G
FALSE	[K].RALEQQVEEMK.[T]	1xOxidation [M10]; 1xTMT6plex [K11]; 1xTMT6plex [N-Term]	0.00139174	1	1	2	P35579	P35579 [1528-1538]		1	1835.01	0.97	38.13		100	K.RALEQQVEEMK.T
FALSE	[R].TVGQLYK.[E]	1xTMT6plex [K7]; 1xTMT6plex [N-Term]	0.00139174	4	4	13	P35580; P35749; P35579; Q7Z406	P35580 [652-658]; P35749 [652-658]; P35579 [645-651]; Q7Z406 [669-675]		0	1266.78	0.97	40.57	Shared	100	R.TVGQLYK.E
FALSE	[K].VAAYDKLEK.[T]	2xTMT6plex [K6; K9]; 1xTMT6plex [N-Term]	0.00164966	1	1	1	P35579	P35579 [1405-1413]		1	1724.06			No Quan Values		K.VAAYDKLEK.T
FALSE	[R].VEEEEER.[NC]	1xTMT6plex [N-Term]	0.00218929	2	2	1	P35580; P35579	P35580 [931-937]; P35579 [924-930]		0	1148.56	0.841	0.63	Shared	100	R.VEEEEER.C
FALSE	[R].VVFQEFR.[Q]	1xTMT6plex [N-Term]	0.00237856	1	1	53	P35579	P35579 [712-718]		0	1153.66	1.055	26.67		100	R.VVFQEFR.Q
FALSE	[K].ADEWLMK.[N]	1xOxidation [M6]; 1xTMT6plex [K7]; 1xTMT6plex [N-Term]	0.00258338	2	2	78	P35580; P35579	P35580 [588-594]; P35579 [581-587]		0	1366.74	1.027	38.73	Shared	100	K.ADEWLMK.N
FALSE	[R].SMAVAAR.[K]	1xOxidation [M2]; 1xTMT6plex [N-Term]	0.00283146	1	1	45	P35579	P35579 [1606-1612]		0	950.529	0.958	33.35		100	R.SMAVAAR.K
FALSE	[K].DQGELER.[Q]	1xTMT6plex [N-Term]	0.00333498	1	1	3	P35579	P35579 [203-209]		0	1075.56	0.929	17.47		100	K.DQGELER.Q
FALSE	[R].EKQLAAENR.[L]	1xTMT6plex [K2]; 1xTMT6plex [N-Term]	0.00477775	1	1	1	P35579	P35579 [859-867]		1	1516.88	0.718	12.9		100	R.EKQLAAENR.L
FALSE	[K].QRQELEK.[T]	1xTMT6plex [K7]; 1xTMT6plex [N-Term]	0.00550176	1	1	6	P35579	P35579 [1042-1048]		1	1388.83	0.878	37.79		100	K.QRQELEK.T
FALSE	[R].EVSSLK.[N]	1xTMT6plex [K6]; 1xTMT6plex [N-Term]	0.00596922	1	1	2	P35579	P35579 [1913-1918]		0	1120.7	1.077	41.88		100	R.EVSSLK.N
FALSE	[R].SMAVAAR.[K]	1xTMT6plex [N-Term]	0.00616547	1	1	4	P35579	P35579 [1606-1612]		0	934.534	1.059	35.38		100	R.SMAVAAR.K
FALSE	[R].NAEQYK.[D]	1xTMT6plex [K6]; 1xTMT6plex [N-Term]	0.00616547	1	1	11	P35579	P35579 [1857-1862]		0	1210.68	1.038	31.64		100	R.NAEQYK.D
FALSE	[K].GDSEHK.[R]	1xTMT6plex [K6]; 1xTMT6plex [N-Term]	0.00797596	1	1	6	P35579	P35579 [1241-1246]		0	1130.62	1.038	19.19		100	K.GDSEHK.R
FALSE	[R].TELADK.[V]	1xTMT6plex [K6]; 1xTMT6plex [N-Term]	0.00813383	1	1	12	P35579	P35579 [1269-1274]		0	1134.68	0.986	31.21		100	R.TELADK.V
FALSE	[RK].NDNSSR.[F]	1xTMT6plex [N-Term]	0.00813383	8	24	1	O00159; P35580; P35749; Q9Y4I1; P35579; O43795; Q7Z406; O94832	O00159 [192-197]; P35580 [236-241]; P35749 [236-241]; Q9Y4I1 [214-219]; P35579 [229-234]; O43795 [160-165]; Q7Z406 [256-261]; O94832 [156-161]		0	921.459	0.893	42.41	Shared	100	K.NDNSSR.F
FALSE	[K].VLLQGK.[G]	1xTMT6plex [K6]; 1xTMT6plex [N-Term]	0.00989666	1	1	4	P35579	P35579 [1235-1240]		0	1115.76	1.006	21.32		100	K.VLLQGK.G
High	P35580	Myosin-10 OS=Homo sapiens OX=9606 GN=MYH10 PE=1 SV=3	1565.16	62	130	2553	101	1976	228.9	5.54	8564.75	130	4628	MYH10	182049	195887	145418	227907	232583	164980
Checked	Annotated Sequence	Modifications	Qvality q-value	# Protein Groups	# Proteins	# PSMs	Master Protein Accessions	Positions in Master Proteins	Modifications in Master Proteins	# Missed Cleavages	Theo. MH+ [Da]	Abundance Ratio: (HO) / (WT)	Abundances (Grouped) CV [%]: HO	Quan Info	Channel Occupancy [%]	Sequence in Protein
FALSE	[K].MQAHIQDLEEQLDEEEGAR.[Q]	1xTMT6plex [N-Term]	0.00030973	1	1	21	P35580	P35580 [948-966]		0	2470.17	0.958	34.7		100	K.MQAHIQDLEEQLDEEEGAR.Q
FALSE	[K].MQAHIQDLEEQLDEEEGAR.[Q]	1xOxidation [M1]; 1xTMT6plex [N-Term]	0.00030973	1	1	43	P35580	P35580 [948-966]		0	2486.17	0.952	23.68		100	K.MQAHIQDLEEQLDEEEGAR.Q
FALSE	[K].MEEEILLLEDQNSK.[F]	1xOxidation [M1]; 1xTMT6plex [K14]; 1xTMT6plex [N-Term]	0.00030973	1	1	33	P35580	P35580 [983-996]		0	2165.14	1.114	20.16		100	K.MEEEILLLEDQNSK.F
FALSE	[K].MEEEILLLEDQNSK.[F]	1xTMT6plex [K14]; 1xTMT6plex [N-Term]	0.00030973	1	1	7	P35580	P35580 [983-996]		0	2149.15	0.99	36.22		100	K.MEEEILLLEDQNSK.F
FALSE	[K].NHEAQIQDMR.[Q]	1xTMT6plex [N-Term]	0.00030973	1	1	11	P35580	P35580 [1189-1198]		0	1470.73	0.971	21.16		100	K.NHEAQIQDMR.Q
FALSE	[K].NHEAQIQDMR.[Q]	1xOxidation [M9]; 1xTMT6plex [N-Term]	0.00030973	1	1	16	P35580	P35580 [1189-1198]		0	1486.73	1.132	1.38		100	K.NHEAQIQDMR.Q
FALSE	[K].NILAEQLQAETELFAEAEEMR.[A]	1xTMT6plex [N-Term]	0.00030973	1	1	6	P35580	P35580 [890-910]		0	2664.34	1.115	8.04		100	K.NILAEQLQAETELFAEAEEMR.A
FALSE	[R].NCAAYLK.[L]	1xCarbamidomethyl [C2]; 1xTMT6plex [K7]; 1xTMT6plex [N-Term]	0.00030973	4	4	20	P35580; P35749; P35579; Q7Z406	P35580 [822-828]; P35749 [822-828]; P35579 [815-821]; Q7Z406 [839-845]		0	1297.73	0.986	42.13	Shared	100	R.NCAAYLK.L
FALSE	[K].NILAEQLQAETELFAEAEEMR.[A]	1xOxidation [M20]; 1xTMT6plex [N-Term]	0.00030973	1	1	15	P35580	P35580 [890-910]		0	2680.33	1.051	25.94		100	K.NILAEQLQAETELFAEAEEMR.A
FALSE	[K].LVQEQGSHSK.[F]	1xTMT6plex [K10]; 1xTMT6plex [N-Term]	0.00030973	1	1	11	P35580	P35580 [553-562]		0	1570.9	0.979	20.45		100	K.LVQEQGSHSK.F
FALSE	[R].IVGLDQVTGMTETAFGSAYKTK.[K]	2xTMT6plex [K20; K22]; 1xTMT6plex [N-Term]	0.00030973	1	1	1	P35580	P35580 [625-646]		1	3004.66	0.964	35.41		100	R.IVGLDQVTGMTETAFGSAYKTK.K
FALSE	[R].IVGLDQVTGMTETAFGSAYKTK.[K]	1xOxidation [M10]; 2xTMT6plex [K20; K22]; 1xTMT6plex [N-Term]	0.00030973	1	1	1	P35580	P35580 [625-646]		1	3020.66	0.821	12.98		100	R.IVGLDQVTGMTETAFGSAYKTK.K
FALSE	[R].IVGLDQVTGMTETAFGSAYK.[T]	1xTMT6plex [K20]; 1xTMT6plex [N-Term]	0.00030973	1	1	6	P35580	P35580 [625-644]		0	2546.36	0.944	47.74		100	R.IVGLDQVTGMTETAFGSAYK.T
FALSE	[R].IVGLDQVTGMTETAFGSAYK.[T]	1xOxidation [M10]; 1xTMT6plex [K20]; 1xTMT6plex [N-Term]	0.00030973	1	1	4	P35580	P35580 [625-644]		0	2562.35	0.978	42.42		100	R.IVGLDQVTGMTETAFGSAYK.T
FALSE	[K].QEVMISDLEER.[L]	1xOxidation [M4]; 1xTMT6plex [N-Term]	0.00030973	1	1	47	P35580	P35580 [1032-1042]		0	1593.8	0.913	30.9		100	K.QEVMISDLEER.L
FALSE	[K].QGLETDNK.[E]	1xTMT6plex [K8]; 1xTMT6plex [N-Term]	0.00030973	1	1	14	P35580	P35580 [1227-1234]		0	1362.76	0.909	32.74		100	K.QGLETDNK.E
FALSE	[K].QEVMISDLEER.[L]	1xTMT6plex [N-Term]	0.00030973	1	1	13	P35580	P35580 [1032-1042]		0	1577.8	1.013	19.37		100	K.QEVMISDLEER.L
FALSE	[R].QEEELQAK.[D]	1xTMT6plex [K8]; 1xTMT6plex [N-Term]	0.00030973	1	1	10	P35580	P35580 [850-857]		0	1432.8	0.938	25.32		100	R.QEEELQAK.D
FALSE	[R].QEEELQAKDEELLK.[V]	2xTMT6plex [K8; K14]; 1xTMT6plex [N-Term]	0.00030973	1	1	6	P35580	P35580 [850-863]		1	2389.34	0.718	54.47		100	R.QEEELQAKDEELLK.V
FALSE	[K].QELEEILHDLESR.[V]	1xTMT6plex [N-Term]	0.00030973	1	1	3	P35580	P35580 [918-930]		0	1839.96	1.334	12.57		100	K.QELEEILHDLESR.V
FALSE	[R].QLLQANPILESFGNAK.[T]	1xTMT6plex [K16]; 1xTMT6plex [N-Term]	0.00030973	1	1	13	P35580	P35580 [217-232]		0	2201.27	1.002	34.46		100	R.QLLQANPILESFGNAK.T
FALSE	[R].QLHLEGASLELSDDDTESK.[T]	1xTMT6plex [K19]; 1xTMT6plex [N-Term]	0.00030973	1	1	3	P35580	P35580 [1945-1963]		0	2545.3	1.081	10.38		100	R.QLHLEGASLELSDDDTESK.T
FALSE	[R].QLEEAEEEATR.[A]	1xTMT6plex [N-Term]	0.00030973	1	1	5	P35580	P35580 [1885-1895]		0	1533.76	0.891	27.02		100	R.QLEEAEEEATR.A
FALSE	[K].NMDPLNDNVATLLHQSSDR.[F]	1xTMT6plex [N-Term]	0.00030973	1	1	4	P35580	P35580 [595-613]		0	2369.17	1.067	3.61		100	K.NMDPLNDNVATLLHQSSDR.F
FALSE	[K].NMDPLNDNVATLLHQSSDR.[F]	1xOxidation [M2]; 1xTMT6plex [N-Term]	0.00030973	1	1	7	P35580	P35580 [595-613]		0	2385.17	1.609	74.11		100	K.NMDPLNDNVATLLHQSSDR.F
FALSE	[R].NQILQNEK.[K]	1xTMT6plex [K8]; 1xTMT6plex [N-Term]	0.00030973	1	1	16	P35580	P35580 [938-945]		0	1444.85	0.955	33.62		100	R.NQILQNEK.K
FALSE	[K].NLPIYSENIIEMYR.[G]	1xTMT6plex [N-Term]	0.00030973	1	1	8	P35580	P35580 [130-143]		0	1984.04	0.986	38.65		100	K.NLPIYSENIIEMYR.G
FALSE	[K].NLPIYSENIIEMYR.[G]	1xOxidation [M12]; 1xTMT6plex [N-Term]	0.00030973	1	1	17	P35580	P35580 [130-143]		0	2000.04	0.934	34.1		100	K.NLPIYSENIIEMYR.G
FALSE	[K].NVHELEK.[SV]	1xTMT6plex [K7]; 1xTMT6plex [N-Term]	0.00030973	2	3	9	P35580; P35749	P35580 [1526-1532]; P35749 [1526-1532]		0	1326.78	0.852	30	Shared	100	K.NVHELEK.S
FALSE	[K].NSLQEQQEEEEEARK.[N]	1xTMT6plex [K15]; 1xTMT6plex [N-Term]	0.00030973	1	1	15	P35580	P35580 [1346-1360]		1	2305.17	0.977	23.64		100	K.NSLQEQQEEEEEARK.N
FALSE	[R].NTDQASMPENTVAQK.[L]	1xTMT6plex [K15]; 1xTMT6plex [N-Term]	0.00030973	1	1	17	P35580	P35580 [366-380]		0	2092.07	0.852	31.91		100	R.NTDQASMPENTVAQK.L
FALSE	[R].NTDQASMPENTVAQK.[L]	1xOxidation [M7]; 1xTMT6plex [K15]; 1xTMT6plex [N-Term]	0.00030973	1	1	38	P35580	P35580 [366-380]		0	2108.07	0.85	33.63		100	R.NTDQASMPENTVAQK.L
FALSE	[R].NTNPNFVR.[C]	1xTMT6plex [N-Term]	0.00030973	2	2	29	P35580; P35579	P35580 [670-677]; P35579 [663-670]		0	1190.65	0.966	33.23	Shared	100	R.NTNPNFVR.C
FALSE	[K].LQQLFNHTMFILEQEEYQR.[E]	1xOxidation [M9]; 1xTMT6plex [N-Term]	0.00030973	3	3	6	P35580; P35749; P35579	P35580 [483-501]; P35749 [483-501]; P35579 [476-494]		0	2712.37	1.015	35.78	Shared	100	K.LQQLFNHTMFILEQEEYQR.E
FALSE	[K].LCHLLGMNVMEFTR.[A]	1xCarbamidomethyl [C2]; 1xTMT6plex [N-Term]	0.00030973	1	1	1	P35580	P35580 [381-394]		0	1950	0.972	17.76		100	K.LCHLLGMNVMEFTR.A
FALSE	[K].LCHLLGMNVMEFTR.[A]	1xCarbamidomethyl [C2]; 1xOxidation [M]; 1xTMT6plex [N-Term]	0.00030973	1	1	3	P35580	P35580 [381-394]		0	1965.99	0.902	5.34		100	K.LCHLLGMNVMEFTR.A
FALSE	[K].LCHLLGMNVMEFTR.[A]	1xCarbamidomethyl [C2]; 2xOxidation [M7; M10]; 1xTMT6plex [N-Term]	0.00030973	1	1	2	P35580	P35580 [381-394]		0	1981.99	0.987	11.43		100	K.LCHLLGMNVMEFTR.A
FALSE	[K].LDAQVQELHAK.[V]	1xTMT6plex [K11]; 1xTMT6plex [N-Term]	0.00030973	1	1	9	P35580	P35580 [1257-1267]		0	1710	0.94	27.88		100	K.LDAQVQELHAK.V
FALSE	[R].IAQLEEELEEEQSNMELLNDR.[F]	1xOxidation [M15]; 1xTMT6plex [N-Term]	0.00030973	1	1	13	P35580	P35580 [1738-1758]		0	2777.33	0.991	30.18		100	R.IAQLEEELEEEQSNMELLNDR.F
FALSE	[R].IAQLEEELEEEQSNMELLNDR.[F]	1xTMT6plex [N-Term]	0.00030973	1	1	7	P35580	P35580 [1738-1758]		0	2761.34	1.043	36.12		100	R.IAQLEEELEEEQSNMELLNDR.F
FALSE	[K].LDGETTDLQDQIAELQAQIDELK.[L]	1xTMT6plex [K23]; 1xTMT6plex [N-Term]	0.00030973	1	1	8	P35580	P35580 [1060-1082]		0	3044.6	1.05	38.05		100	K.LDGETTDLQDQIAELQAQIDELK.L
FALSE	[K].LDPHLVLDQLR.[C]	1xTMT6plex [N-Term]	0.00030973	2	2	66	P35580; P35579	P35580 [690-700]; P35579 [683-693]		0	1547.91	0.976	32.63	Shared	100	K.LDPHLVLDQLR.C
FALSE	[K].KEEELQGALAR.[G]	1xTMT6plex [K1]; 1xTMT6plex [N-Term]	0.00030973	1	1	9	P35580	P35580 [1088-1098]		1	1701.99	0.885	31.83		100	K.KEEELQGALAR.G
FALSE	[KR].KFDQLLAEEK.[SNTA]	2xTMT6plex [K1; K10]; 1xTMT6plex [N-Term]	0.00030973	4	4	107	P35580; P35749; P35579; Q7Z406	P35580 [1452-1461]; P35749 [1452-1461]; P35579 [1445-1454]; Q7Z406 [1469-1478]		1	1908.14	0.985	38.57	Shared	100	K.KFDQLLAEEK.S
FALSE	[K].KLDAQVQELHAK.[V]	2xTMT6plex [K1; K12]; 1xTMT6plex [N-Term]	0.00030973	1	1	15	P35580	P35580 [1256-1267]		1	2067.25	0.84	31.61		100	K.KLDAQVQELHAK.V
FALSE	[R].KLDGETTDLQDQIAELQAQIDELK.[L]	2xTMT6plex [K1; K24]; 1xTMT6plex [N-Term]	0.00030973	1	1	3	P35580	P35580 [1059-1082]		1	3401.86	0.931	44.32		100	R.KLDGETTDLQDQIAELQAQIDELK.L
FALSE	[R].HGFEAASIK.[E]	1xTMT6plex [K9]; 1xTMT6plex [N-Term]	0.00030973	1	1	6	P35580	P35580 [43-51]		0	1417.82	0.973	28.13		100	R.HGFEAASIK.E
FALSE	[K].HQQLLEEK.[N]	1xTMT6plex [K8]; 1xTMT6plex [N-Term]	0.00030973	1	1	12	P35580	P35580 [882-889]		0	1482.87	0.939	19.32		100	K.HQQLLEEK.N
FALSE	[R].IAECSSQLAEEEEK.[A]	1xCarbamidomethyl [C4]; 1xTMT6plex [K14]; 1xTMT6plex [N-Term]	0.00030973	1	1	15	P35580	P35580 [1008-1021]		0	2081.05	0.833	37.14		100	R.IAECSSQLAEEEEK.A
FALSE	[K].KVDDDLGTIESLEEAK.[K]	2xTMT6plex [K1; K16]; 1xTMT6plex [N-Term]	0.00030973	1	1	36	P35580	P35580 [1379-1394]		1	2449.36	0.929	36.98		100	K.KVDDDLGTIESLEEAK.K
FALSE	[K].KMEEEILLLEDQNSK.[F]	2xTMT6plex [K1; K15]; 1xTMT6plex [N-Term]	0.00030973	1	1	8	P35580	P35580 [982-996]		1	2506.4	0.951	37.67		100	K.KMEEEILLLEDQNSK.F
FALSE	[K].KMEEEILLLEDQNSK.[F]	1xOxidation [M2]; 2xTMT6plex [K1; K15]; 1xTMT6plex [N-Term]	0.00030973	1	1	27	P35580	P35580 [982-996]		1	2522.4	0.993	27.53		100	K.KMEEEILLLEDQNSK.F
FALSE	[K].KQELEEILHDLESR.[V]	1xTMT6plex [K1]; 1xTMT6plex [N-Term]	0.00030973	1	1	5	P35580	P35580 [917-930]		1	2197.22	1.064	16.45		100	K.KQELEEILHDLESR.V
FALSE	[R].LEVNMQAMK.[A]	1xTMT6plex [K9]; 1xTMT6plex [N-Term]	0.00030973	1	1	5	P35580	P35580 [1565-1573]		0	1521.85	0.926	43.35		100	R.LEVNMQAMK.A
FALSE	[R].LEVNMQAMK.[A]	1xOxidation [M]; 1xTMT6plex [K9]; 1xTMT6plex [N-Term]	0.00030973	1	1	45	P35580	P35580 [1565-1573]		0	1537.85	0.896	39.07		100	R.LEVNMQAMK.A
FALSE	[K].LQNELDNVSTLLEEAEK.[K]	1xTMT6plex [K17]; 1xTMT6plex [N-Term]	0.00030973	1	1	11	P35580	P35580 [1285-1301]		0	2403.3	1.015	41.58		100	K.LQNELDNVSTLLEEAEK.K
FALSE	[R].LQQELDDLTVDLDHQR.[Q]	1xTMT6plex [N-Term]	0.00030973	1	1	19	P35580	P35580 [1425-1440]		0	2167.12	0.958	30.85		100	R.LQQELDDLTVDLDHQR.Q
FALSE	[K].LQQLFNHTMFILEQEEYQR.[E]	1xTMT6plex [N-Term]	0.00030973	3	3	3	P35580; P35749; P35579	P35580 [483-501]; P35749 [483-501]; P35579 [476-494]		0	2696.37	1.201	6.87	Shared	100	K.LQQLFNHTMFILEQEEYQR.E
FALSE	[K].LQELEGAVK.[S]	1xTMT6plex [K9]; 1xTMT6plex [N-Term]	0.00030973	1	1	21	P35580	P35580 [1801-1809]		0	1444.88	0.947	29.33		100	K.LQELEGAVK.S
FALSE	[K].IGQLEEQLEQEAK.[E]	1xTMT6plex [K13]; 1xTMT6plex [N-Term]	0.00030973	1	1	20	P35580	P35580 [1823-1835]		0	1973.1	0.937	34.62		100	K.IGQLEEQLEQEAK.E
FALSE	[K].VDDDLGTIESLEEAK.[K]	1xTMT6plex [K15]; 1xTMT6plex [N-Term]	0.00030973	1	1	10	P35580	P35580 [1380-1394]		0	2092.11	0.913	38.02		100	K.VDDDLGTIESLEEAK.K
FALSE	[K].VDDDLGTIESLEEAKK.[K]	2xTMT6plex [K15; K16]; 1xTMT6plex [N-Term]	0.00030973	1	1	7	P35580	P35580 [1380-1395]		1	2449.36	0.904	36.94		100	K.VDDDLGTIESLEEAKK.K
FALSE	[K].VEGELEEMERK.[H]	1xTMT6plex [K11]; 1xTMT6plex [N-Term]	0.00030973	1	1	6	P35580	P35580 [871-881]		1	1806.97	0.739	40.19		100	K.VEGELEEMERK.H
FALSE	[K].VEDMAELTCLNEASVLHNLK.[DE]	1xCarbamidomethyl [C9]; 1xTMT6plex [K20]; 1xTMT6plex [N-Term]	0.00030973	2	2	7	P35580; P35579	P35580 [87-106]; P35579 [83-102]		0	2744.44	1.151	42.19	Shared	100	K.VEDMAELTCLNEASVLHNLK.D
FALSE	[R].VEEEEERNQILQNEK.[K]	1xTMT6plex [K15]; 1xTMT6plex [N-Term]	0.00030973	1	1	10	P35580	P35580 [931-945]		1	2345.23	0.721	30.68		100	R.VEEEEERNQILQNEK.K
FALSE	[K].VEGELEEMER.[K]	1xOxidation [M8]; 1xTMT6plex [N-Term]	0.00030973	1	1	1	P35580	P35580 [871-880]		0	1465.7	0.914	24.89		100	K.VEGELEEMER.K
FALSE	[K].VEDMAELTCLNEASVLHNLK.[DE]	1xCarbamidomethyl [C9]; 1xOxidation [M4]; 1xTMT6plex [K20]; 1xTMT6plex [N-Term]	0.00030973	2	2	19	P35580; P35579	P35580 [87-106]; P35579 [83-102]		0	2760.43	1.072	31.58	Shared	100	K.VEDMAELTCLNEASVLHNLK.D
FALSE	[K].TTLQVDTLNAELAAER.[S]	1xTMT6plex [N-Term]	0.00030973	1	1	45	P35580	P35580 [1762-1777]		0	1974.07	0.874	18.99		100	K.TTLQVDTLNAELAAER.S
FALSE	[RK].TQLEELEDELQATEDAK.[L]	1xTMT6plex [K17]; 1xTMT6plex [N-Term]	0.00030973	3	3	87	P35580; P35749; P35579	P35580 [1546-1562]; P35749 [1546-1562]; P35579 [1539-1555]		0	2420.24	1.028	34.54	Shared	100	R.TQLEELEDELQATEDAK.L
FALSE	[RK].TQLEELEDELQATEDAKLR.[L]	1xTMT6plex [K17]; 1xTMT6plex [N-Term]	0.00030973	3	3	1	P35580; P35749; P35579	P35580 [1546-1564]; P35749 [1546-1564]; P35579 [1539-1557]		1	2689.43	1.207	25.57	Shared	100	R.TQLEELEDELQATEDAKLR.L
FALSE	[K].TSDVNETQPPQSE.[-]	1xTMT6plex [N-Term]	0.00030973	1	1	5	P35580	P35580 [1964-1976]		0	1660.79	1.042	22.31		100	K.TSDVNETQPPQSE.-
FALSE	[K].VVSSVLQFGNISFK.[K]	1xTMT6plex [K14]; 1xTMT6plex [N-Term]	0.00030973	1	1	4	P35580	P35580 [349-362]		0	1983.17	0.922	34.7		100	K.VVSSVLQFGNISFK.K
FALSE	[R].YEILTPNAIPK.[G]	1xTMT6plex [K11]; 1xTMT6plex [N-Term]	0.00030973	2	2	12	P35580; Q7Z406	P35580 [728-738]; Q7Z406 [745-755]		0	1717.03	0.869	38.17	Shared	100	R.YEILTPNAIPK.G
FALSE	[K].VKPLLQVTR.[Q]	1xTMT6plex [K2]; 1xTMT6plex [N-Term]	0.00030973	3	3	1	P35580; P35749; Q7Z406	P35580 [841-849]; P35749 [841-849]; Q7Z406 [858-866]		0	1512	0.8	49.67	Shared	100	K.VKPLLQVTR.Q
FALSE	[K].SDLLLEGFNNYR.[F]	1xTMT6plex [N-Term]	0.00030973	1	1	15	P35580	P35580 [297-308]		0	1669.87	0.877	34.42		100	K.SDLLLEGFNNYR.F
FALSE	[K].RQLEEAEEEATR.[A]	1xTMT6plex [N-Term]	0.00030973	1	1	4	P35580	P35580 [1884-1895]		1	1689.86	0.896	25.67		100	K.RQLEEAEEEATR.A
FALSE	[K].SLEAEILQLQEELASSER.[A]	1xTMT6plex [N-Term]	0.00030973	1	1	13	P35580	P35580 [1684-1701]		0	2274.2	1.086	11.63		100	K.SLEAEILQLQEELASSER.A
FALSE	[R].QRYEILTPNAIPK.[G]	1xTMT6plex [K13]; 1xTMT6plex [N-Term]	0.00030973	2	2	2	P35580; Q7Z406	P35580 [726-738]; Q7Z406 [743-755]		1	2001.19	0.617	45.01	Shared	100	R.QRYEILTPNAIPK.G
FALSE	[K].QQQLSALK.[V]	1xTMT6plex [K8]; 1xTMT6plex [N-Term]	0.00030973	1	1	8	P35580	P35580 [810-817]		0	1373.85	0.89	36.34		100	K.QQQLSALK.V
FALSE	[K].RALEQQVEEMR.[T]	1xTMT6plex [N-Term]	0.00030973	1	1	4	P35580	P35580 [1535-1545]		1	1617.86	0.828	18.76		100	K.RALEQQVEEMR.T
FALSE	[K].RDLSEELEALK.[T]	1xTMT6plex [K11]; 1xTMT6plex [N-Term]	0.00030973	1	1	2	P35580	P35580 [1142-1152]		1	1761.02	0.91	34.84		100	K.RDLSEELEALK.T
FALSE	[K].REQEVAELK.[K]	1xTMT6plex [K9]; 1xTMT6plex [N-Term]	0.00030973	1	1	10	P35580	P35580 [1172-1180]		1	1559.92	0.918	18.08		100	K.REQEVAELK.K
FALSE	[R].RGGPISFSSSR.[S]	1xTMT6plex [N-Term]	0.00030973	1	1	1	P35580	P35580 [1930-1940]		1	1379.76	0.782	8.22		100	R.RGGPISFSSSR.S
FALSE	[R].QVASNLEK.[K]	1xTMT6plex [K8]; 1xTMT6plex [N-Term]	0.00030973	1	1	16	P35580	P35580 [1441-1448]		0	1346.8	0.89	33.91		100	R.QVASNLEK.K
FALSE	[K].QVLALQSQLADTK.[K]	1xTMT6plex [K13]; 1xTMT6plex [N-Term]	0.00030973	1	1	15	P35580	P35580 [1365-1377]		0	1873.12	0.872	38.72		100	K.QVLALQSQLADTK.K
FALSE	[R].TGLEDPER.[Y]	1xTMT6plex [N-Term]	0.00030973	1	1	4	P35580	P35580 [5-12]		0	1145.6	0.946	23.03		100	R.TGLEDPER.Y
FALSE	[K].TELEDTLDTTAAQQELR.[T]	1xTMT6plex [N-Term]	0.00030973	1	1	29	P35580	P35580 [1153-1169]		0	2163.1	0.933	38.23		100	K.TELEDTLDTTAAQQELR.T
FALSE	[K].FDQLLAEEK.[SNTA]	1xTMT6plex [K9]; 1xTMT6plex [N-Term]	0.00030973	4	4	23	P35580; P35749; P35579; Q7Z406	P35580 [1453-1461]; P35749 [1453-1461]; P35579 [1446-1454]; Q7Z406 [1470-1478]		0	1550.88	1.047	32.1	Shared	100	K.FDQLLAEEK.S
FALSE	[R].ALEQQVEEMR.[T]	1xOxidation [M9]; 1xTMT6plex [N-Term]	0.00030973	1	1	93	P35580	P35580 [1536-1545]		0	1477.75	0.951	26.55		100	R.ALEQQVEEMR.T
FALSE	[R].ALEQQVEEMR.[T]	1xTMT6plex [N-Term]	0.00030973	1	1	15	P35580	P35580 [1536-1545]		0	1461.76	0.922	27.69		100	R.ALEQQVEEMR.T
FALSE	[RK].ALELDPNLYR.[I]	1xTMT6plex [N-Term]	0.00030973	2	2	10	P35580; P35749	P35580 [753-762]; P35749 [753-762]		0	1432.8	0.935	34.95	Shared	100	R.ALELDPNLYR.I
FALSE	[K].ATISALEAK.[I]	1xTMT6plex [K9]; 1xTMT6plex [N-Term]	0.00030973	1	1	5	P35580	P35580 [1814-1822]		0	1361.84	0.853	41.8		100	K.ATISALEAK.I
FALSE	[R].FLSNGYIPIPGQQDK.[D]	1xTMT6plex [K15]; 1xTMT6plex [N-Term]	0.00030973	1	1	1	P35580	P35580 [309-323]		0	2135.19	0.875	10.17		100	R.FLSNGYIPIPGQQDK.D
FALSE	[R].AGVLAHLEEERDLK.[I]	1xTMT6plex [K14]; 1xTMT6plex [N-Term]	0.00030973	2	2	10	P35580; P35579	P35580 [772-785]; P35579 [765-778]		1	2038.17	0.717	18.94	Shared	100	R.AGVLAHLEEERDLK.I
FALSE	[R].AGVLAHLEEER.[D]	1xTMT6plex [N-Term]	0.00030973	2	2	140	P35580; P35579	P35580 [772-782]; P35579 [765-775]		0	1452.8	1.012	30.76	Shared	100	R.AGVLAHLEEER.D
FALSE	[R].ALEEALEAK.[E]	1xTMT6plex [K9]; 1xTMT6plex [N-Term]	0.00030973	2	2	24	P35580; P35749	P35580 [1491-1499]; P35749 [1491-1499]		0	1431.85	0.949	34.29	Shared	100	R.ALEEALEAK.E
FALSE	[K].EIFMQVEDER.[R]	1xOxidation [M4]; 1xTMT6plex [N-Term]	0.00030973	1	1	8	P35580	P35580 [1853-1862]		0	1540.75	1.009	29.22		100	K.EIFMQVEDER.R
FALSE	[K].EIFMQVEDERR.[H]	1xTMT6plex [N-Term]	0.00030973	1	1	23	P35580	P35580 [1853-1863]		1	1680.86	1.019	30.29		100	K.EIFMQVEDERR.H
FALSE	[K].EIFMQVEDER.[R]	1xTMT6plex [N-Term]	0.00030973	1	1	8	P35580	P35580 [1853-1862]		0	1524.76	1.048	29.34		100	K.EIFMQVEDER.R
FALSE	[K].EIFMQVEDERR.[H]	1xOxidation [M4]; 1xTMT6plex [N-Term]	0.00030973	1	1	52	P35580	P35580 [1853-1863]		1	1696.85	1.048	11.34		100	K.EIFMQVEDERR.H
FALSE	[R].EDQSILCTGESGAGK.[T]	1xCarbamidomethyl [C7]; 1xTMT6plex [K15]; 1xTMT6plex [N-Term]	0.00030973	4	4	55	P35580; P35749; P35579; Q7Z406	P35580 [170-184]; P35749 [170-184]; P35579 [166-180]; Q7Z406 [190-204]		0	2010.02	1.119	31.96	Shared	100	R.EDQSILCTGESGAGK.T
FALSE	[K].EEELQGALAR.[G]	1xTMT6plex [N-Term]	0.00030973	1	1	5	P35580	P35580 [1089-1098]		0	1344.73	0.905	26.76		100	K.EEELQGALAR.G
FALSE	[R].ELQAQIAELQEDFESEK.[A]	1xTMT6plex [K17]; 1xTMT6plex [N-Term]	0.00030973	1	1	16	P35580	P35580 [1115-1131]		0	2465.28	0.969	35.04		100	R.ELQAQIAELQEDFESEK.A
FALSE	[K].EERGDEVMVELAENGKK.[A]	2xTMT6plex [K16; K17]; 1xTMT6plex [N-Term]	0.00030973	1	1	8	P35580	P35580 [52-68]		2	2620.42	0.752	43.56		100	K.EERGDEVMVELAENGKK.A
FALSE	[R].ELEAELEDERK.[Q]	1xTMT6plex [K11]; 1xTMT6plex [N-Term]	0.00030973	1	1	15	P35580	P35580 [1600-1610]		1	1818.98	0.91	28.77		100	R.ELEAELEDERK.Q
FALSE	[R].ELDDATEANEGLSR.[E]	1xTMT6plex [N-Term]	0.00030973	1	1	18	P35580	P35580 [1906-1919]		0	1748.85	0.916	29.38		100	R.ELDDATEANEGLSR.E
FALSE	[K].EERGDEVMVELAENGK.[K]	1xOxidation [M8]; 1xTMT6plex [K16]; 1xTMT6plex [N-Term]	0.00030973	1	1	7	P35580	P35580 [52-67]		1	2279.16	0.91	23.15		100	K.EERGDEVMVELAENGK.K
FALSE	[K].EERGDEVMVELAENGK.[K]	1xTMT6plex [K16]; 1xTMT6plex [N-Term]	0.00030973	1	1	14	P35580	P35580 [52-67]		1	2263.16	0.933	34.54		100	K.EERGDEVMVELAENGK.K
FALSE	[RK].EQEVAELK.[KQ]	1xTMT6plex [K8]; 1xTMT6plex [N-Term]	0.00030973	1	2	13	P35580	P35580 [1173-1180]		0	1403.81	0.938	32.08		100	R.EQEVAELK.K
FALSE	[R].EQEVAELKK.[A]	2xTMT6plex [K8; K9]; 1xTMT6plex [N-Term]	0.00030973	1	1	3	P35580	P35580 [1173-1181]		1	1761.07	0.668	55.65		100	R.EQEVAELKK.A
FALSE	[K].EQADFAVEALAK.[A]	1xTMT6plex [K12]; 1xTMT6plex [N-Term]	0.00030973	2	2	35	P35580; P35749	P35580 [415-426]; P35749 [415-426]		0	1749.98	0.94	31.04	Shared	100	K.EQADFAVEALAK.A
FALSE	[R].ASRDEIFAQSK.[E]	1xTMT6plex [K11]; 1xTMT6plex [N-Term]	0.00030973	1	1	6	P35580	P35580 [1666-1676]		1	1709.96	0.877	8.86		100	R.ASRDEIFAQSK.E
FALSE	[R].ADMEDLMSSK.[D]	2xOxidation [M3; M7]; 1xTMT6plex [K10]; 1xTMT6plex [N-Term]	0.00030973	1	1	19	P35580	P35580 [1511-1520]		0	1616.79	0.941	26.07		100	R.ADMEDLMSSK.D
FALSE	[R].ADMEDLMSSK.[D]	1xOxidation [M]; 1xTMT6plex [K10]; 1xTMT6plex [N-Term]	0.00030973	1	1	37	P35580	P35580 [1511-1520]		0	1600.8	0.908	33.25		100	R.ADMEDLMSSK.D
FALSE	[R].ADMEDLMSSK.[D]	1xTMT6plex [K10]; 1xTMT6plex [N-Term]	0.00030973	1	1	11	P35580	P35580 [1511-1520]		0	1584.8	0.889	38.64		100	R.ADMEDLMSSK.D
FALSE	[K].ADFCIIHYAGK.[V]	1xCarbamidomethyl [C4]; 1xTMT6plex [K11]; 1xTMT6plex [N-Term]	0.00030973	2	2	24	P35580; P35579	P35580 [573-583]; P35579 [566-576]		0	1752.95	0.951	41.7	Shared	100	K.ADFCIIHYAGK.V
FALSE	[R].DEIFAQSK.[E]	1xTMT6plex [K8]; 1xTMT6plex [N-Term]	0.00030973	1	1	10	P35580	P35580 [1669-1676]		0	1395.79	0.911	35.55		100	R.DEIFAQSK.E
FALSE	[R].GGPISFSSSR.[S]	1xTMT6plex [N-Term]	0.00030973	1	1	5	P35580	P35580 [1931-1940]		0	1223.66	0.765	36.25		100	R.GGPISFSSSR.S
FALSE	[K].DHNIPGELER.[Q]	1xTMT6plex [N-Term]	0.00030973	1	1	19	P35580	P35580 [207-216]		0	1408.74	0.951	13.23		100	K.DHNIPGELER.Q
FALSE	[R].CNGVLEGIR.[I]	1xCarbamidomethyl [C1]; 1xTMT6plex [N-Term]	0.00030973	4	13	27	P35580; P35749; P35579; Q7Z406	P35580 [701-709]; P35749 [701-709]; P35579 [694-702]; Q7Z406 [718-726]		0	1246.68	0.925	40.35	Shared	100	R.CNGVLEGIR.I
FALSE	[R].DELADEITNSASGK.[S]	1xTMT6plex [K14]; 1xTMT6plex [N-Term]	0.00030973	1	1	17	P35580	P35580 [1711-1724]		0	1908	1.501	41.32		100	R.DELADEITNSASGK.S
FALSE	[R].HAEQERDELADEITNSASGK.[S]	1xTMT6plex [K20]; 1xTMT6plex [N-Term]	0.00030973	1	1	33	P35580	P35580 [1705-1724]		1	2658.34	0.821	30.52		100	R.HAEQERDELADEITNSASGK.S
FALSE	[R].HATALEELSEQLEQAK.[R]	1xTMT6plex [K16]; 1xTMT6plex [N-Term]	0.00030973	1	1	7	P35580	P35580 [1201-1216]		0	2255.23	0.996	30.52		100	R.HATALEELSEQLEQAK.R
FALSE	[K].DAASLESQLQDTQELLQEETR.[Q]	1xTMT6plex [N-Term]	0.00030973	1	1	17	P35580	P35580 [1309-1329]		0	2633.31	0.985	33.13		100	K.DAASLESQLQDTQELLQEETR.Q
FALSE	[K].DAEALSQR.[L]	1xTMT6plex [N-Term]	0.00030973	1	1	10	P35580	P35580 [1400-1407]		0	1118.6	0.923	22.01		100	K.DAEALSQR.L
FALSE	[R].GDEVMVELAENGK.[K]	1xTMT6plex [K13]; 1xTMT6plex [N-Term]	0.00030973	1	1	18	P35580	P35580 [55-67]		0	1848.98	1.042	25.73		100	R.GDEVMVELAENGK.K
FALSE	[R].GDDETLHK.[N]	1xTMT6plex [K8]; 1xTMT6plex [N-Term]	0.00030973	1	1	21	P35580	P35580 [1099-1106]		0	1372.75	0.909	20.94		100	R.GDDETLHK.N
FALSE	[R].GDEVMVELAENGK.[K]	1xOxidation [M5]; 1xTMT6plex [K13]; 1xTMT6plex [N-Term]	0.00030973	1	1	27	P35580	P35580 [55-67]		0	1864.97	0.966	19		100	R.GDEVMVELAENGK.K
FALSE	[R].GDEVMVELAENGKK.[A]	1xOxidation [M5]; 2xTMT6plex [K13; K14]; 1xTMT6plex [N-Term]	0.00030973	1	1	3	P35580	P35580 [55-68]		1	2222.23	0.879	29.59		100	R.GDEVMVELAENGKK.A
FALSE	[R].GDEVMVELAENGKK.[A]	2xTMT6plex [K13; K14]; 1xTMT6plex [N-Term]	0.00030973	1	1	7	P35580	P35580 [55-68]		1	2206.24	0.902	31.62		100	R.GDEVMVELAENGKK.A
FALSE	[K].DNFQETMEAMHIMGFSHEEILSMLK.[V]	3xOxidation [M7; M10; M13]; 1xTMT6plex [K25]; 1xTMT6plex [N-Term]	0.00030973	1	1	1	P35580	P35580 [324-348]		0	3474.65	0.946	53.24		100	K.DNFQETMEAMHIMGFSHEEILSMLK.V
FALSE	[R].CMLQDREDQSILCTGESGAGK.[T]	2xCarbamidomethyl [C1; C13]; 1xOxidation [M2]; 1xTMT6plex [K21]; 1xTMT6plex [N-Term]	0.00030973	1	1	17	P35580	P35580 [164-184]		1	2829.36	0.876	29.23		100	R.CMLQDREDQSILCTGESGAGK.T
FALSE	[K].DLEAQIEAANK.[A]	1xTMT6plex [K11]; 1xTMT6plex [N-Term]	0.00030973	1	1	33	P35580	P35580 [1628-1638]		0	1659.93	0.905	33.05		100	K.DLEAQIEAANK.A
FALSE	[R].CMLQDREDQSILCTGESGAGK.[T]	2xCarbamidomethyl [C1; C13]; 1xTMT6plex [K21]; 1xTMT6plex [N-Term]	0.00030973	1	1	9	P35580	P35580 [164-184]		1	2813.36	0.851	44.24		100	R.CMLQDREDQSILCTGESGAGK.T
FALSE	[R].CIIPNHEK.[RK]	1xCarbamidomethyl [C1]; 1xTMT6plex [K8]; 1xTMT6plex [N-Term]	0.00030973	3	3	37	P35580; P35749; P35579	P35580 [678-685]; P35749 [678-685]; P35579 [671-678]		0	1468.83	1	29.39	Shared	100	R.CIIPNHEK.R
FALSE	[R].AVIYNPATQADWTAK.[K]	1xTMT6plex [K15]; 1xTMT6plex [N-Term]	0.00030973	1	1	9	P35580	P35580 [19-33]		0	2107.16	0.91	29.67		100	R.AVIYNPATQADWTAK.K
FALSE	[R].DLSEELEALK.[T]	1xTMT6plex [K10]; 1xTMT6plex [N-Term]	0.00030973	1	1	22	P35580	P35580 [1143-1152]		0	1604.91	0.933	37.44		100	R.DLSEELEALK.T
FALSE	[R].DRAEAEAR.[E]	1xTMT6plex [N-Term]	0.000568404	3	3	1	P35580; P35749; P35579	P35580 [1472-1479]; P35749 [1472-1479]; P35579 [1465-1472]		1	1146.61	0.973	3.55	Shared	100	R.DRAEAEAR.E
FALSE	[K].SALLDEK.[R]	1xTMT6plex [K7]; 1xTMT6plex [N-Term]	0.000568404	1	1	11	P35580	P35580 [1725-1731]		0	1233.75	0.814	33.61		100	K.SALLDEK.R
FALSE	[R].LRVELAEK.[A]	1xTMT6plex [K8]; 1xTMT6plex [N-Term]	0.000568404	1	1	2	P35580	P35580 [1274-1281]		1	1415.9	0.684	70.03		100	R.LRVELAEK.A
FALSE	[K].ADEWLMK.[N]	1xTMT6plex [K7]; 1xTMT6plex [N-Term]	0.000568404	2	2	27	P35580; P35579	P35580 [588-594]; P35579 [581-587]		0	1350.75	1.003	38.39	Shared	100	K.ADEWLMK.N
FALSE	[R].KLQAQMK.[D]	2xTMT6plex [K1; K7]; 1xTMT6plex [N-Term]	0.000568404	3	3	1	P35580; P35749; P35579	P35580 [1649-1655]; P35749 [1649-1655]; P35579 [1642-1648]		1	1533.98	0.77	50.21	Shared	100	R.KLQAQMK.D
FALSE	[R].LEVNMQAMK.[A]	2xOxidation [M5; M8]; 1xTMT6plex [K9]; 1xTMT6plex [N-Term]	0.000568404	1	1	22	P35580	P35580 [1565-1573]		0	1553.84	0.967	24.86		100	R.LEVNMQAMK.A
FALSE	[K].ELACEVK.[V]	1xCarbamidomethyl [C4]; 1xTMT6plex [K7]; 1xTMT6plex [N-Term]	0.000568404	1	1	12	P35580	P35580 [1235-1241]		0	1306.74	0.895	37.12		100	K.ELACEVK.V
FALSE	[K].ALEEETK.[N]	1xTMT6plex [K7]; 1xTMT6plex [N-Term]	0.00139174	1	1	3	P35580	P35580 [1182-1188]		0	1277.74	0.954	28.26		100	K.ALEEETK.N
FALSE	[R].ALAVASK.[K]	1xTMT6plex [K7]; 1xTMT6plex [N-Term]	0.00139174	1	1	3	P35580	P35580 [1613-1619]		0	1117.73	0.849	38.45		100	R.ALAVASK.K
FALSE	[R].TVGQLYK.[E]	1xTMT6plex [K7]; 1xTMT6plex [N-Term]	0.00139174	4	4	13	P35580; P35749; P35579; Q7Z406	P35580 [652-658]; P35749 [652-658]; P35579 [645-651]; Q7Z406 [669-675]		0	1266.78	0.97	40.57	Shared	100	R.TVGQLYK.E
FALSE	[R].VEEEEER.[NC]	1xTMT6plex [N-Term]	0.00218929	2	2	1	P35580; P35579	P35580 [931-937]; P35579 [924-930]		0	1148.56	0.841	0.63	Shared	100	R.VEEEEER.N
FALSE	[K].EERGDEVMVELAENGKK.[A]	1xOxidation [M8]; 2xTMT6plex [K16; K17]; 1xTMT6plex [N-Term]	0.00218929	1	1	2	P35580	P35580 [52-68]		2	2636.42	0.794	37.08		100	K.EERGDEVMVELAENGKK.A
FALSE	[K].ADEWLMK.[N]	1xOxidation [M6]; 1xTMT6plex [K7]; 1xTMT6plex [N-Term]	0.00258338	2	2	78	P35580; P35579	P35580 [588-594]; P35579 [581-587]		0	1366.74	1.027	38.73	Shared	100	K.ADEWLMK.N
FALSE	[K].VSEGDRLR.[V]	1xTMT6plex [N-Term]	0.00258338	1	1	2	P35580	P35580 [1268-1275]		1	1160.66	0.761	16.66		100	K.VSEGDRLR.V
FALSE	[R].HADQYK.[E]	1xTMT6plex [K6]; 1xTMT6plex [N-Term]	0.00283146	1	1	7	P35580	P35580 [1864-1869]		0	1219.68	0.791	27.71		100	R.HADQYK.E
FALSE	[K].AESEHK.[R]	1xTMT6plex [K6]; 1xTMT6plex [N-Term]	0.00380261	1	1	4	P35580	P35580 [1248-1253]		0	1158.65	1.09	24.05		100	K.AESEHK.R
FALSE	[K].VEGELEEMERK.[H]	1xOxidation [M8]; 1xTMT6plex [K11]; 1xTMT6plex [N-Term]	0.00404001	1	1	1	P35580	P35580 [871-881]		1	1822.96	0.854	24.45		100	K.VEGELEEMERK.H
FALSE	[R].IVFQEFR.[Q]	1xTMT6plex [N-Term]	0.00428502	2	2	7	P35580; P35749	P35580 [719-725]; P35749 [719-725]		0	1167.67	0.918	29.11	Shared	100	R.IVFQEFR.Q
FALSE	[R].FVAELWK.[D]	1xTMT6plex [K7]; 1xTMT6plex [N-Term]	0.00573188	1	1	1	P35580	P35580 [614-620]		0	1350.82	0.919	39.59		100	R.FVAELWK.D
FALSE	[K].LVWIPSER.[H]	1xTMT6plex [N-Term]	0.00616547	1	1	3	P35580	P35580 [35-42]		0	1228.73	0.886	33.11		100	K.LVWIPSER.H
FALSE	[K].ALAYDK.[L]	1xTMT6plex [K6]; 1xTMT6plex [N-Term]	0.0071119	1	1	11	P35580	P35580 [1412-1417]		0	1138.69	0.944	26.94		100	K.ALAYDK.L
FALSE	[RK].NDNSSR.[F]	1xTMT6plex [N-Term]	0.00813383	8	24	1	O00159; P35580; P35749; Q9Y4I1; P35579; O43795; Q7Z406; O94832	O00159 [192-197]; P35580 [236-241]; P35749 [236-241]; Q9Y4I1 [214-219]; P35579 [229-234]; O43795 [160-165]; Q7Z406 [256-261]; O94832 [156-161]		0	921.459	0.893	42.41	Shared	100	K.NDNSSR.F
FALSE	[K].ARDEVIK.[Q]	1xTMT6plex [K7]; 1xTMT6plex [N-Term]	0.00947302	1	1	4	P35580	P35580 [1639-1645]		1	1288.8	0.976	24.07		100	K.ARDEVIK.Q
High	Q03001	Dystonin OS=Homo sapiens OX=9606 GN=DST PE=1 SV=4	587.839	21	151	211	147	7570	860.1	5.25	600.24	151	667	DST	19012	21286.9	15885.4	22754.1	24864.9	18223.8
Checked	Annotated Sequence	Modifications	Qvality q-value	# Protein Groups	# Proteins	# PSMs	Master Protein Accessions	Positions in Master Proteins	Modifications in Master Proteins	# Missed Cleavages	Theo. MH+ [Da]	Abundance Ratio: (HO) / (WT)	Abundances (Grouped) CV [%]: HO	Quan Info	Channel Occupancy [%]	Sequence in Protein
FALSE	[R].NDDITDGNPK.[L]	1xTMT6plex [K10]; 1xTMT6plex [N-Term]	0.00030973	2	2	1	Q03001; Q9UPN3	Q03001 [115-124]; Q9UPN3 [158-167]		0	1546.81	0.873	20.75	Shared	100	R.NDDITDGNPK.L
FALSE	[R].NECSSVYSK.[G]	1xCarbamidomethyl [C3]; 1xTMT6plex [K9]; 1xTMT6plex [N-Term]	0.00030973	1	1	1	Q03001	Q03001 [478-486]		0	1531.78	0.956	29.63		100	R.NECSSVYSK.G
FALSE	[K].ISSEEISTK.[K]	1xTMT6plex [K9]; 1xTMT6plex [N-Term]	0.00030973	1	1	2	Q03001	Q03001 [1476-1484]		0	1451.84	0.92	28.62		100	K.ISSEEISTK.K
FALSE	[K].LTELLEENPDTPEAPR.[W]	1xTMT6plex [N-Term]	0.00030973	1	1	4	Q03001	Q03001 [4579-4594]		0	2053.07	1.015	24.9		100	K.LTELLEENPDTPEAPR.W
FALSE	[K].ISEIQMTAPLK.[L]	1xOxidation [M6]; 1xTMT6plex [K11]; 1xTMT6plex [N-Term]	0.00030973	1	1	2	Q03001	Q03001 [660-670]		0	1705	0.749	19.4		100	K.ISEIQMTAPLK.L
FALSE	[K].ITGVFELMR.[E]	1xTMT6plex [N-Term]	0.00030973	1	1	1	Q03001	Q03001 [3247-3255]		0	1294.74	0.857	24.45		100	K.ITGVFELMR.E
FALSE	[R].LVNCEPIGTQASK.[L]	1xCarbamidomethyl [C4]; 1xTMT6plex [K13]; 1xTMT6plex [N-Term]	0.00030973	1	1	1	Q03001	Q03001 [5524-5536]		0	1875.04	0.843	27.63		100	R.LVNCEPIGTQASK.L
FALSE	[R].LVSDTITQK.[V]	1xTMT6plex [K9]; 1xTMT6plex [N-Term]	0.00030973	1	1	1	Q03001	Q03001 [5811-5819]		0	1462.89	0.841	32.7		100	R.LVSDTITQK.V
FALSE	[R].QEFIDGILSSK.[F]	1xTMT6plex [K11]; 1xTMT6plex [N-Term]	0.00030973	1	1	2	Q03001	Q03001 [7220-7230]		0	1694.97	1.011	16.54		100	R.QEFIDGILSSK.F
FALSE	[K].QLQESQTSGDVK.[V]	1xTMT6plex [K12]; 1xTMT6plex [N-Term]	0.00030973	1	1	1	Q03001	Q03001 [1535-1546]		0	1777.97			No Quan Values		K.QLQESQTSGDVK.V
FALSE	[R].QLETFELGLAPIAVILR.[K]	1xTMT6plex [N-Term]	0.00030973	1	1	2	Q03001	Q03001 [3434-3450]		0	2112.26	1.165	12.68		100	R.QLETFELGLAPIAVILR.K
FALSE	[K].QLGIIDNNTASILK.[N]	1xTMT6plex [K14]; 1xTMT6plex [N-Term]	0.00030973	1	1	2	Q03001	Q03001 [1915-1928]		0	1958.17	0.724	34.68		100	K.QLGIIDNNTASILK.N
FALSE	[K].NNIENLISTLK.[Q]	1xTMT6plex [K11]; 1xTMT6plex [N-Term]	0.00030973	1	1	1	Q03001	Q03001 [1206-1216]		0	1717.03	0.813	30.72		100	K.NNIENLISTLK.Q
FALSE	[K].NIMLEQDIAGR.[Q]	1xTMT6plex [N-Term]	0.00030973	1	1	1	Q03001	Q03001 [4200-4210]		0	1488.8	0.856	42.91		100	K.NIMLEQDIAGR.Q
FALSE	[K].LCEEEAVIADK.[N]	1xCarbamidomethyl [C2]; 1xTMT6plex [K11]; 1xTMT6plex [N-Term]	0.00030973	1	1	2	Q03001	Q03001 [1195-1205]		0	1734.93	0.973	10.67		100	K.LCEEEAVIADK.N
FALSE	[R].LAQDLVVEASDSK.[G]	1xTMT6plex [K13]; 1xTMT6plex [N-Term]	0.00030973	1	1	1	Q03001	Q03001 [5124-5136]		0	1833.04	0.92	3.17		100	R.LAQDLVVEASDSK.G
FALSE	[K].LASMSPIGTDLETVK.[Q]	1xOxidation [M4]; 1xTMT6plex [K15]; 1xTMT6plex [N-Term]	0.00030973	1	1	1	Q03001	Q03001 [6290-6304]		0	2036.13	0.835	29.21		100	K.LASMSPIGTDLETVK.Q
FALSE	[K].LASTISIDPK.[V]	1xTMT6plex [K10]; 1xTMT6plex [N-Term]	0.00030973	1	1	2	Q03001	Q03001 [2111-2120]		0	1502.92	0.869	27.46		100	K.LASTISIDPK.V
FALSE	[K].LEESSNNLTQFQTVEAQLK.[Q]	1xTMT6plex [K19]; 1xTMT6plex [N-Term]	0.00030973	1	1	1	Q03001	Q03001 [4620-4638]		0	2637.41	0.824	39.56		100	K.LEESSNNLTQFQTVEAQLK.Q
FALSE	[K].IDQILESLER.[I]	1xTMT6plex [N-Term]	0.00030973	1	1	1	Q03001	Q03001 [6054-6063]		0	1444.82	0.773	45.45		100	K.IDQILESLER.I
FALSE	[K].LDVLESLIK.[D]	1xTMT6plex [K9]; 1xTMT6plex [N-Term]	0.00030973	1	1	1	Q03001	Q03001 [4879-4887]		0	1487.94	0.902	32.89		100	K.LDVLESLIK.D
FALSE	[K].IAALYIPESSQVIGLDAAK.[Q]	1xTMT6plex [K19]; 1xTMT6plex [N-Term]	0.00030973	1	1	1	Q03001	Q03001 [1896-1914]		0	2417.41	0.928	37.59		100	K.IAALYIPESSQVIGLDAAK.Q
FALSE	[K].LNDALDRLEELR.[E]	1xTMT6plex [N-Term]	0.00030973	1	1	1	Q03001	Q03001 [7166-7177]		1	1685.94	1.55	63.98		100	K.LNDALDRLEELR.E
FALSE	[R].LNHQAELLLK.[K]	1xTMT6plex [K10]; 1xTMT6plex [N-Term]	0.00030973	1	1	2	Q03001	Q03001 [6327-6336]		0	1637.02	0.874	9.15		100	R.LNHQAELLLK.K
FALSE	[K].LQGIGHFQNTIR.[E]	1xTMT6plex [N-Term]	0.00030973	1	1	1	Q03001	Q03001 [5170-5181]		0	1612.91	0.969	10.63		100	K.LQGIGHFQNTIR.E
FALSE	[K].IQENQPENSK.[T]	1xTMT6plex [K10]; 1xTMT6plex [N-Term]	0.00030973	1	1	4	Q03001	Q03001 [1316-1325]		0	1644.9	0.858	19.49		100	K.IQENQPENSK.T
FALSE	[R].LQNVQIALDYLK.[R]	1xTMT6plex [K12]; 1xTMT6plex [N-Term]	0.00030973	1	1	2	Q03001	Q03001 [93-104]		0	1876.13	0.874	39		100	R.LQNVQIALDYLK.R
FALSE	[K].LQPLYETLK.[Q]	1xTMT6plex [K9]; 1xTMT6plex [N-Term]	0.00030973	1	1	2	Q03001	Q03001 [6098-6106]		0	1562.96	0.86	40.3		100	K.LQPLYETLK.Q
FALSE	[K].LINSQFPFPQITNNEELNQK.[G]	1xTMT6plex [K20]; 1xTMT6plex [N-Term]	0.00030973	1	1	2	Q03001	Q03001 [2876-2895]		0	2832.53	0.796	41.18		100	K.LINSQFPFPQITNNEELNQK.G
FALSE	[K].IHLNPVGSDK.[V]	1xTMT6plex [K10]; 1xTMT6plex [N-Term]	0.00030973	1	1	1	Q03001	Q03001 [2495-2504]		0	1537.91	0.935	0		100	K.IHLNPVGSDK.V
FALSE	[K].LLADGYSEK.[I]	1xTMT6plex [K9]; 1xTMT6plex [N-Term]	0.00030973	1	1	2	Q03001	Q03001 [3285-3293]		0	1453.83	0.859	31.75		100	K.LLADGYSEK.I
FALSE	[K].LILAGNALQSDSK.[R]	1xTMT6plex [K13]; 1xTMT6plex [N-Term]	0.00030973	1	1	1	Q03001	Q03001 [404-416]		0	1788.06	0.79	44.87		100	K.LILAGNALQSDSK.R
FALSE	[R].LLDPEDVDVSSPDEK.[S]	1xTMT6plex [K15]; 1xTMT6plex [N-Term]	0.00030973	1	1	1	Q03001	Q03001 [227-241]		0	2116.11	1.216	28.32		100	R.LLDPEDVDVSSPDEK.S
FALSE	[K].LLDVMELAEK.[F]	1xTMT6plex [K10]; 1xTMT6plex [N-Term]	0.00030973	1	1	2	Q03001	Q03001 [6153-6162]		0	1618.95	0.885	36.37		100	K.LLDVMELAEK.F
FALSE	[K].VELFENLSEK.[L]	1xTMT6plex [K10]; 1xTMT6plex [N-Term]	0.00030973	1	1	2	Q03001	Q03001 [4268-4277]		0	1665.95	0.894	36.57		100	K.VELFENLSEK.L
FALSE	[K].VEEIDAAILR.[S]	1xTMT6plex [N-Term]	0.00030973	1	1	1	Q03001	Q03001 [5820-5829]		0	1357.79	0.799	32.54		100	K.VEEIDAAILR.S
FALSE	[K].TNWDTFNK.[Q]	1xTMT6plex [K8]; 1xTMT6plex [N-Term]	0.00030973	1	1	1	Q03001	Q03001 [4934-4941]		0	1483.79	0.774	41.56		100	K.TNWDTFNK.Q
FALSE	[K].TLATQLNQQK.[M]	1xTMT6plex [K10]; 1xTMT6plex [N-Term]	0.00030973	1	1	3	Q03001	Q03001 [1326-1335]		0	1602.96	0.803	38.28		100	K.TLATQLNQQK.M
FALSE	[K].TLEQALQLAR.[R]	1xTMT6plex [N-Term]	0.00030973	1	1	2	Q03001	Q03001 [5713-5722]		0	1371.82	1.071	33.32		100	K.TLEQALQLAR.R
FALSE	[R].TSSVQALK.[R]	1xTMT6plex [K8]; 1xTMT6plex [N-Term]	0.00030973	1	1	1	Q03001	Q03001 [6868-6875]		0	1291.8	0.747	30.73		100	R.TSSVQALK.R
FALSE	[K].TQALTEVDVPGK.[D]	1xTMT6plex [K12]; 1xTMT6plex [N-Term]	0.00030973	1	1	1	Q03001	Q03001 [4286-4297]		0	1715.99	0.952	22.64		100	K.TQALTEVDVPGK.D
FALSE	[K].TSLADDNLK.[L]	1xTMT6plex [K9]; 1xTMT6plex [N-Term]	0.00030973	1	1	1	Q03001	Q03001 [6775-6783]		0	1434.82	0.688	38.13		100	K.TSLADDNLK.L
FALSE	[K].YAEQYSATVK.[D]	1xTMT6plex [K10]; 1xTMT6plex [N-Term]	0.00030973	1	1	1	Q03001	Q03001 [1354-1363]		0	1617.89	0.848	35.89		100	K.YAEQYSATVK.D
FALSE	[K].YISNTSGEDEK.[T]	1xTMT6plex [K11]; 1xTMT6plex [N-Term]	0.00030973	1	1	1	Q03001	Q03001 [2315-2325]		0	1700.87	0.741	32.16		100	K.YISNTSGEDEK.T
FALSE	[R].VNVVQLASPSENNLVTEK.[S]	1xTMT6plex [K18]; 1xTMT6plex [N-Term]	0.00030973	1	1	2	Q03001	Q03001 [2664-2681]		0	2399.35	0.935	33.95		100	R.VNVVQLASPSENNLVTEK.S
FALSE	[K].VPEGGEGIGANDVEVK.[W]	1xTMT6plex [K16]; 1xTMT6plex [N-Term]	0.00030973	1	1	1	Q03001	Q03001 [257-272]		0	2028.1	0.878	66.7		100	K.VPEGGEGIGANDVEVK.W
FALSE	[K].VPIVQPSFGAEDLGK.[S]	1xTMT6plex [K15]; 1xTMT6plex [N-Term]	0.00030973	1	1	1	Q03001	Q03001 [4395-4409]		0	2015.16	0.952	31.44		100	K.VPIVQPSFGAEDLGK.S
FALSE	[K].TIAEGENLLLK.[T]	1xTMT6plex [K11]; 1xTMT6plex [N-Term]	0.00030973	1	1	2	Q03001	Q03001 [4906-4916]		0	1659.01	0.967	32.85		100	K.TIAEGENLLLK.T
FALSE	[R].SDSENILTNYENQSR.[V]	1xTMT6plex [N-Term]	0.00030973	1	1	1	Q03001	Q03001 [2149-2163]		0	1998.96	0.857	6.73		100	R.SDSENILTNYENQSR.V
FALSE	[K].SDILIEDETSIQK.[M]	1xTMT6plex [K13]; 1xTMT6plex [N-Term]	0.00030973	1	1	2	Q03001	Q03001 [2829-2841]		0	1949.08	1.085	31.01		100	K.SDILIEDETSIQK.M
FALSE	[K].SELLLNILK.[Q]	1xTMT6plex [K9]; 1xTMT6plex [N-Term]	0.00030973	1	1	1	Q03001	Q03001 [3231-3239]		0	1500.98	1.007	32.88		100	K.SELLLNILK.Q
FALSE	[K].SAETNIDQDINNLK.[E]	1xTMT6plex [K14]; 1xTMT6plex [N-Term]	0.00030973	1	1	3	Q03001	Q03001 [6560-6573]		0	2033.09	0.827	26.12		100	K.SAETNIDQDINNLK.E
FALSE	[K].SLDSELEIANDPDK.[I]	1xTMT6plex [K14]; 1xTMT6plex [N-Term]	0.00030973	1	1	2	Q03001	Q03001 [6726-6739]		0	2004.05	1.054	1.09		100	K.SLDSELEIANDPDK.I
FALSE	[R].QQVQILLQEFATR.[K]	1xTMT6plex [N-Term]	0.00030973	1	1	1	Q03001	Q03001 [4666-4678]		0	1803.03	1.222	3.12		100	R.QQVQILLQEFATR.K
FALSE	[K].QNVDQALLNGLELLK.[Q]	1xTMT6plex [K15]; 1xTMT6plex [N-Term]	0.00030973	1	1	1	Q03001	Q03001 [5665-5679]		0	2126.26	0.97	12.51		100	K.QNVDQALLNGLELLK.Q
FALSE	[K].QQDVNWLGQGLIQSAAK.[S]	1xTMT6plex [K17]; 1xTMT6plex [N-Term]	0.00030973	1	1	1	Q03001	Q03001 [5339-5355]		0	2314.29	1.108	31.33		100	K.QQDVNWLGQGLIQSAAK.S
FALSE	[K].QTTGDEVLIIQDK.[L]	1xTMT6plex [K13]; 1xTMT6plex [N-Term]	0.00030973	1	1	1	Q03001	Q03001 [5680-5692]		0	1918.09	0.834	24.03		100	K.QTTGDEVLIIQDK.L
FALSE	[K].QVIEQNGTHFQEGDGK.[S]	1xTMT6plex [K16]; 1xTMT6plex [N-Term]	0.00030973	1	1	2	Q03001	Q03001 [3802-3817]		0	2245.16	0.995	13.15		100	K.QVIEQNGTHFQEGDGK.S
FALSE	[K].TAFSSLSNVSSER.[T]	1xTMT6plex [N-Term]	0.00030973	1	1	2	Q03001	Q03001 [3484-3496]		0	1613.83	0.792	35.81		100	K.TAFSSLSNVSSER.T
FALSE	[R].STSVSSQAAQAASPQVPATTTPK.[G]	1xTMT6plex [K23]; 1xTMT6plex [N-Term]	0.00030973	1	1	1	Q03001	Q03001 [7420-7442]		0	2673.45	1.132	37.08		100	R.STSVSSQAAQAASPQVPATTTPK.G
FALSE	[R].STLQENTGMWLLPVRPQEGGR.[I]	1xTMT6plex [N-Term]	0.00030973	1	1	1	Q03001	Q03001 [1727-1747]		0	2598.37	0.915	37.94		100	R.STLQENTGMWLLPVRPQEGGR.I
FALSE	[K].EVVTDENK.[S]	1xTMT6plex [K8]; 1xTMT6plex [N-Term]	0.00030973	1	1	1	Q03001	Q03001 [5030-5037]		0	1391.78	0.807	30.76		100	K.EVVTDENK.S
FALSE	[R].ATNELIWLNEK.[E]	1xTMT6plex [K11]; 1xTMT6plex [N-Term]	0.00030973	1	1	1	Q03001	Q03001 [708-718]		0	1789.03	0.761	35.31		100	R.ATNELIWLNEK.E
FALSE	[K].EVIPQEIEEVK.[A]	1xTMT6plex [K11]; 1xTMT6plex [N-Term]	0.00030973	1	1	2	Q03001	Q03001 [7060-7070]		0	1771.03	0.838	32.51		100	K.EVIPQEIEEVK.A
FALSE	[K].EVQIPELSQVFVEDVK.[D]	1xTMT6plex [K16]; 1xTMT6plex [N-Term]	0.00030973	1	1	1	Q03001	Q03001 [3130-3145]		0	2317.31	0.983	25.26		100	K.EVQIPELSQVFVEDVK.D
FALSE	[K].FCGVNETENEDNTNR.[D]	1xCarbamidomethyl [C2]; 1xTMT6plex [N-Term]	0.00030973	1	1	1	Q03001	Q03001 [2199-2213]		0	2027.89	0.88	11.79		100	K.FCGVNETENEDNTNR.D
FALSE	[K].ALQGQISSQQVAVEK.[L]	1xTMT6plex [K15]; 1xTMT6plex [N-Term]	0.00030973	1	1	2	Q03001	Q03001 [4091-4105]		0	2044.18	1.056	21.73		100	K.ALQGQISSQQVAVEK.L
FALSE	[R].FFLGNQFGDSQQLR.[L]	1xTMT6plex [N-Term]	0.00030973	1	1	1	Q03001	Q03001 [7307-7320]		0	1885.98	0.931	30.87		100	R.FFLGNQFGDSQQLR.L
FALSE	[K].ALEDDIINHNK.[H]	1xTMT6plex [K11]; 1xTMT6plex [N-Term]	0.00030973	1	1	3	Q03001	Q03001 [5546-5556]		0	1739.97	0.829	7.97		100	K.ALEDDIINHNK.H
FALSE	[R].FHGVLPDDEDALR.[T]	1xTMT6plex [N-Term]	0.00030973	1	1	3	Q03001	Q03001 [6947-6959]		0	1712.88	0.939	22.17		100	R.FHGVLPDDEDALR.T
FALSE	[K].DSPLNDMIQSNDLCSK.[E]	1xCarbamidomethyl [C14]; 1xTMT6plex [K16]; 1xTMT6plex [N-Term]	0.00030973	1	1	1	Q03001	Q03001 [3024-3039]		0	2295.14	0.88	22		100	K.DSPLNDMIQSNDLCSK.E
FALSE	[K].EEIEPLQGK.[Q]	1xTMT6plex [K9]; 1xTMT6plex [N-Term]	0.00030973	1	1	1	Q03001	Q03001 [5330-5338]		0	1500.87	0.785	39.07		100	K.EEIEPLQGK.Q
FALSE	[K].EFSILLQK.[A]	1xTMT6plex [K8]; 1xTMT6plex [N-Term]	0.00030973	1	1	1	Q03001	Q03001 [5292-5299]		0	1435.89	0.852	34.22		100	K.EFSILLQK.A
FALSE	[K].EHLQLGVNNTK.[E]	1xTMT6plex [K11]; 1xTMT6plex [N-Term]	0.00030973	1	1	1	Q03001	Q03001 [3005-3015]		0	1710.99	0.853	32.22		100	K.EHLQLGVNNTK.E
FALSE	[R].EEQVEGTIK.[R]	1xTMT6plex [K9]; 1xTMT6plex [N-Term]	0.00030973	1	1	1	Q03001	Q03001 [5273-5281]		0	1490.85	0.842	32.16		100	R.EEQVEGTIK.R
FALSE	[R].EQIIELDK.[T]	1xTMT6plex [K8]; 1xTMT6plex [N-Term]	0.00030973	1	1	1	Q03001	Q03001 [6650-6657]		0	1445.86			No Quan Values		R.EQIIELDK.T
FALSE	[K].EQGQVPLNSTALQDIISK.[N]	1xTMT6plex [K18]; 1xTMT6plex [N-Term]	0.00030973	1	1	2	Q03001	Q03001 [4182-4199]		0	2399.35	0.965	26.28		100	K.EQGQVPLNSTALQDIISK.N
FALSE	[K].ESFTASLK.[F]	1xTMT6plex [K8]; 1xTMT6plex [N-Term]	0.00030973	1	1	2	Q03001	Q03001 [2540-2547]		0	1340.78	0.847	31.07		100	K.ESFTASLK.F
FALSE	[R].ANECSHSK.[N]	1xCarbamidomethyl [C4]; 1xTMT6plex [K8]; 1xTMT6plex [N-Term]	0.00030973	1	1	1	Q03001	Q03001 [2170-2177]		0	1390.71	0.845	4.12		100	R.ANECSHSK.N
FALSE	[K].ENENSMVPQGAPVGSLSVK.[N]	1xTMT6plex [K19]; 1xTMT6plex [N-Term]	0.00030973	1	1	2	Q03001	Q03001 [2453-2471]		0	2401.28			No Quan Values		K.ENENSMVPQGAPVGSLSVK.N
FALSE	[R].GLIDYDTGIR.[L]	1xTMT6plex [N-Term]	0.00030973	1	1	1	Q03001	Q03001 [1576-1585]		0	1351.74	0.947	34.52		100	R.GLIDYDTGIR.L
FALSE	[K].CQNNLEEIK.[F]	1xCarbamidomethyl [C1]; 1xTMT6plex [K9]; 1xTMT6plex [N-Term]	0.00030973	1	1	1	Q03001	Q03001 [4974-4982]		0	1605.87	0.818	35.08		100	K.CQNNLEEIK.F
FALSE	[K].DDLGTITNK.[C]	1xTMT6plex [K9]; 1xTMT6plex [N-Term]	0.00030973	1	1	1	Q03001	Q03001 [1121-1129]		0	1434.82	0.781	28.44		100	K.DDLGTITNK.C
FALSE	[K].DDECVLANNSHR.[A]	1xCarbamidomethyl [C4]; 1xTMT6plex [N-Term]	0.00030973	1	1	2	Q03001	Q03001 [908-919]		0	1658.78	2.042	102.35		100	K.DDECVLANNSHR.A
FALSE	[K].DECTATPSSFNK.[C]	1xCarbamidomethyl [C3]; 1xTMT6plex [K12]; 1xTMT6plex [N-Term]	0.00030973	1	1	1	Q03001	Q03001 [2059-2070]		0	1814.9	0.664	39.39		100	K.DECTATPSSFNK.C
FALSE	[K].AALQLQLNTIK.[T]	1xTMT6plex [K11]; 1xTMT6plex [N-Term]	0.00030973	1	1	1	Q03001	Q03001 [4923-4933]		0	1671.06	0.915	22.42		100	K.AALQLQLNTIK.T
FALSE	[R].AAQLQEALLHCGR.[F]	1xCarbamidomethyl [C11]; 1xTMT6plex [N-Term]	0.00030973	1	1	1	Q03001	Q03001 [5384-5396]		0	1695.92	1.13	6.94		100	R.AAQLQEALLHCGR.F
FALSE	[K].DMQGSAQALAEVVK.[N]	1xOxidation [M2]; 1xTMT6plex [K14]; 1xTMT6plex [N-Term]	0.00030973	1	1	1	Q03001	Q03001 [3692-3705]		0	1921.05	1	1.44		100	K.DMQGSAQALAEVVK.N
FALSE	[K].CAIDEEFNEMR.[N]	1xCarbamidomethyl [C1]; 1xTMT6plex [N-Term]	0.00030973	1	1	1	Q03001	Q03001 [2087-2097]		0	1642.74	0.872	34.33		100	K.CAIDEEFNEMR.N
FALSE	[K].AGNDLIESSAGEEASNLQNK.[L]	1xTMT6plex [K20]; 1xTMT6plex [N-Term]	0.00030973	1	1	2	Q03001	Q03001 [6440-6459]		0	2505.28	0.902	43.9		100	K.AGNDLIESSAGEEASNLQNK.L
FALSE	[K].TAEVLLDAR.[G]	1xTMT6plex [N-Term]	0.000568404	1	1	3	Q03001	Q03001 [4109-4117]		0	1216.71	0.845	19.37		100	K.TAEVLLDAR.G
FALSE	[K].SFEAELK.[Q]	1xTMT6plex [K7]; 1xTMT6plex [N-Term]	0.000568404	1	1	1	Q03001	Q03001 [4560-4566]		0	1281.75	0.858	34.05		100	K.SFEAELK.Q
FALSE	[K].QGQYLSPEEK.[E]	1xTMT6plex [K10]; 1xTMT6plex [N-Term]	0.000568404	1	1	3	Q03001	Q03001 [3881-3890]		0	1636.89	0.767	40.19		100	K.QGQYLSPEEK.E
FALSE	[K].QQLDGALR.[Q]	1xTMT6plex [N-Term]	0.000568404	1	1	2	Q03001	Q03001 [6479-6486]		0	1129.65	0.888	12.52		100	K.QQLDGALR.Q
FALSE	[KR].DVLPPIIK.[DT]	1xTMT6plex [K8]; 1xTMT6plex [N-Term]	0.000568404	1	2	2	Q03001	Q03001 [2708-2715]		0	1352.89	0.792	35.48		100	K.DVLPPIIK.D
FALSE	[K].SAEREEQEESVYNLYISEVR.[N]	1xTMT6plex [N-Term]	0.000568404	1	1	1	Q03001	Q03001 [1054-1073]		1	2659.3	1.041	16.46		100	K.SAEREEQEESVYNLYISEVR.N
FALSE	[K].CSFLETK.[L]	1xCarbamidomethyl [C1]; 1xTMT6plex [K7]; 1xTMT6plex [N-Term]	0.000568404	1	1	1	Q03001	Q03001 [5163-5169]		0	1342.74	0.813	48.51		100	K.CSFLETK.L
FALSE	[K].EAVDLANR.[I]	1xTMT6plex [N-Term]	0.000568404	1	1	2	Q03001	Q03001 [947-954]		0	1116.62	0.895	24.18		100	K.EAVDLANR.I
FALSE	[R].ASNVASIK.[T]	1xTMT6plex [K8]; 1xTMT6plex [N-Term]	0.000568404	1	1	1	Q03001	Q03001 [991-998]		0	1247.77	0.917	2.07		100	R.ASNVASIK.T
FALSE	[R].DDPFCIGNLK.[S]	1xCarbamidomethyl [C5]; 1xTMT6plex [K10]; 1xTMT6plex [N-Term]	0.000568404	1	1	3	Q03001	Q03001 [3221-3230]		0	1636.88	0.864	7.3		100	R.DDPFCIGNLK.S
FALSE	[K].VHYETALAESEK.[K]	1xTMT6plex [K12]; 1xTMT6plex [N-Term]	0.000568404	1	1	1	Q03001	Q03001 [3902-3913]		0	1835	0.902	16.6		100	K.VHYETALAESEK.K
FALSE	[R].AAHEGLIDR.[E]	1xTMT6plex [N-Term]	0.000568404	1	1	1	Q03001	Q03001 [1761-1769]		0	1210.67	1.654	17.81		100	R.AAHEGLIDR.E
FALSE	[R].LESQYAK.[L]	1xTMT6plex [K7]; 1xTMT6plex [N-Term]	0.000568404	1	1	1	Q03001	Q03001 [680-686]		0	1296.76	0.865	23.69		100	R.LESQYAK.L
FALSE	[K].LFNAIIHK.[Y]	1xTMT6plex [K8]; 1xTMT6plex [N-Term]	0.000568404	1	1	1	Q03001	Q03001 [185-192]		0	1413.9	0.937	16.61		100	K.LFNAIIHK.Y
FALSE	[K].MMLATEETSPDLVGIK.[R]	1xOxidation [M2]; 1xTMT6plex [K16]; 1xTMT6plex [N-Term]	0.000568404	1	1	1	Q03001	Q03001 [5237-5252]		0	2209.19	1.093	1.27		100	K.MMLATEETSPDLVGIK.R
FALSE	[K].NLLISVQSR.[W]	1xTMT6plex [N-Term]	0.000568404	1	1	1	Q03001	Q03001 [6676-6684]		0	1258.77	0.943	26.56		100	K.NLLISVQSR.W
FALSE	[K].NTENFLK.[E]	1xTMT6plex [K7]; 1xTMT6plex [N-Term]	0.000568404	1	1	1	Q03001	Q03001 [3706-3712]		0	1323.77	0.853	29.18		100	K.NTENFLK.E
FALSE	[K].QEIQQEK.[K]	1xTMT6plex [K7]; 1xTMT6plex [N-Term]	0.000568404	1	1	2	Q03001	Q03001 [4784-4790]		0	1360.78	0.835	27.82		100	K.QEIQQEK.K
FALSE	[K].AQIQEQK.[L]	1xTMT6plex [K7]; 1xTMT6plex [N-Term]	0.000568404	2	2	1	Q03001; Q9UPN3	Q03001 [5430-5436]; Q9UPN3 [5382-5388]		0	1302.78	0.864	17.4	Shared	100	K.AQIQEQK.L
FALSE	[R].DSVICEDK.[L]	1xCarbamidomethyl [C5]; 1xTMT6plex [K8]; 1xTMT6plex [N-Term]	0.0008677	1	1	2	Q03001	Q03001 [396-403]		0	1423.75	0.903	29.44		100	R.DSVICEDK.L
FALSE	[K].QDVVLIK.[N]	1xTMT6plex [K7]; 1xTMT6plex [N-Term]	0.0008677	2	2	1	Q03001; Q9UPN3	Q03001 [6669-6675]; Q9UPN3 [6516-6522]		0	1272.83	0.848	38.52	Shared	100	K.QDVVLIK.N
FALSE	[K].FDDSGSWR.[G]	1xTMT6plex [N-Term]	0.00115152	1	1	1	Q03001	Q03001 [2548-2555]		0	1198.57	0.954	5.97		100	K.FDDSGSWR.G
FALSE	[K].HTVQDPLMELK.[L]	1xOxidation [M8]; 1xTMT6plex [K11]; 1xTMT6plex [N-Term]	0.00115152	1	1	1	Q03001	Q03001 [6345-6355]		0	1785			No Quan Values		K.HTVQDPLMELK.L
FALSE	[K].HVNDLYEDLR.[D]	1xTMT6plex [N-Term]	0.00139174	1	1	1	Q03001	Q03001 [55-64]		0	1502.78	1.087	28.96		100	K.HVNDLYEDLR.D
FALSE	[K].HVEDVGK.[N]	1xTMT6plex [K7]; 1xTMT6plex [N-Term]	0.00139174	1	1	2	Q03001	Q03001 [3068-3074]		0	1241.73	0.736	1.28		100	K.HVEDVGK.N
FALSE	[K].LAEEFLK.[S]	1xTMT6plex [K7]; 1xTMT6plex [N-Term]	0.00139174	1	1	1	Q03001	Q03001 [3455-3461]		0	1307.8	0.852	30.18		100	K.LAEEFLK.S
FALSE	[R].QLEGILK.[S]	1xTMT6plex [K7]; 1xTMT6plex [N-Term]	0.00139174	1	1	2	Q03001	Q03001 [4819-4825]		0	1258.81	0.855	32.52		100	R.QLEGILK.S
FALSE	[K].EQISENK.[N]	1xTMT6plex [K7]; 1xTMT6plex [N-Term]	0.00139174	1	1	1	Q03001	Q03001 [6083-6089]		0	1305.74	0.935	37.03		100	K.EQISENK.N
FALSE	[K].EQLAAVTQK.[W]	1xTMT6plex [K9]; 1xTMT6plex [N-Term]	0.00139174	1	1	1	Q03001	Q03001 [4708-4716]		0	1445.87	1.143	1.28		100	K.EQLAAVTQK.W
FALSE	[K].ILIQNLIK.[R]	1xTMT6plex [K8]; 1xTMT6plex [N-Term]	0.00139174	1	3	2	Q03001	Q03001 [3173-3180]		0	1412.96	0.828	25.4		100	K.ILIQNLIK.R
FALSE	[K].VVTTAIK.[E]	1xTMT6plex [K7]; 1xTMT6plex [N-Term]	0.00164966	1	1	1	Q03001	Q03001 [3754-3760]		0	1189.79	0.73	39.19		100	K.VVTTAIK.E
FALSE	[K].TQVEQNK.[S]	1xTMT6plex [K7]; 1xTMT6plex [N-Term]	0.00164966	1	1	1	Q03001	Q03001 [4553-4559]		0	1304.76	0.708	44.66		100	K.TQVEQNK.S
FALSE	[R].DLEALSK.[Q]	1xTMT6plex [K7]; 1xTMT6plex [N-Term]	0.00164966	1	1	2	Q03001	Q03001 [5254-5260]		0	1233.75	0.927	27.16		100	R.DLEALSK.Q
FALSE	[K].EFQEVSK.[E]	1xTMT6plex [K7]; 1xTMT6plex [N-Term]	0.00164966	1	1	1	Q03001	Q03001 [5066-5072]		0	1324.75	0.763	23.32		100	K.EFQEVSK.E
FALSE	[R].GSLLPAK.[N]	1xTMT6plex [K7]; 1xTMT6plex [N-Term]	0.00218929	1	1	1	Q03001	Q03001 [4118-4124]		0	1143.75	0.795	40.19		100	R.GSLLPAK.N
FALSE	[K].IAELNTK.[L]	1xTMT6plex [K7]; 1xTMT6plex [N-Term]	0.00218929	1	1	1	Q03001	Q03001 [4505-4511]		0	1246.78	0.812	40.82		100	K.IAELNTK.L
FALSE	[K].TVNLVLK.[N]	1xTMT6plex [K7]; 1xTMT6plex [N-Term]	0.00237856	1	1	1	Q03001	Q03001 [1173-1179]		0	1244.83	0.936	15.87		100	K.TVNLVLK.N
FALSE	[K].NDFLQSER.[C]	1xTMT6plex [N-Term]	0.00237856	1	1	2	Q03001	Q03001 [3075-3082]		0	1237.64	0.879	21.55		100	K.NDFLQSER.C
FALSE	[R].MTVEEAVR.[E]	1xTMT6plex [N-Term]	0.00237856	1	1	1	Q03001	Q03001 [1794-1801]		0	1163.63	0.925	38.18		100	R.MTVEEAVR.E
FALSE	[K].YVAADTLYSQIK.[E]	1xTMT6plex [K12]; 1xTMT6plex [N-Term]	0.00237856	1	1	1	Q03001	Q03001 [6019-6030]		0	1830.04	1.003	11.03		100	K.YVAADTLYSQIK.E
FALSE	[R].ILTTEQTK.[L]	1xTMT6plex [K8]; 1xTMT6plex [N-Term]	0.00237856	1	1	1	Q03001	Q03001 [489-496]		0	1391.85	0.791	31.5		100	R.ILTTEQTK.L
FALSE	[K].FAGDSLK.[R]	1xTMT6plex [K7]; 1xTMT6plex [N-Term]	0.00258338	1	1	2	Q03001	Q03001 [1420-1426]		0	1195.71	0.939	21.33		100	K.FAGDSLK.R
FALSE	[K].NYDTICQINSER.[Y]	1xCarbamidomethyl [C6]; 1xTMT6plex [N-Term]	0.00258338	1	1	1	Q03001	Q03001 [5917-5928]		0	1741.84	0.874	36.85		100	K.NYDTICQINSER.Y
FALSE	[K].VSLIDMVQR.[S]	1xTMT6plex [N-Term]	0.00333498	1	1	1	Q03001	Q03001 [1718-1726]		0	1289.74	1.072	7.74		100	K.VSLIDMVQR.S
FALSE	[R].IEQQLPK.[E]	1xTMT6plex [K7]; 1xTMT6plex [N-Term]	0.00357681	1	1	2	Q03001	Q03001 [3112-3118]		0	1313.82	0.824	27		100	R.IEQQLPK.E
FALSE	[K].VQMQELSTR.[W]	1xTMT6plex [N-Term]	0.00380261	1	1	1	Q03001	Q03001 [6894-6902]		0	1320.71	0.931	10.59		100	K.VQMQELSTR.W
FALSE	[K].EELLQYK.[S]	1xTMT6plex [K7]; 1xTMT6plex [N-Term]	0.00428502	1	1	1	Q03001	Q03001 [855-861]		0	1380.81			No Quan Values		K.EELLQYK.S
FALSE	[K].AGKPPFSK.[Q]	2xTMT6plex [K3; K8]; 1xTMT6plex [N-Term]	0.00477775	1	1	1	Q03001	Q03001 [1466-1473]		0	1518.96	0.845	38.11		100	K.AGKPPFSK.Q
FALSE	[K].ADQLVER.[W]	1xTMT6plex [N-Term]	0.00502099	1	1	1	Q03001	Q03001 [1264-1270]		0	1059.6	0.862	13.16		100	K.ADQLVER.W
FALSE	[K].RFQVEQIGDNK.[Y]	1xTMT6plex [K11]; 1xTMT6plex [N-Term]	0.00502099	1	1	1	Q03001	Q03001 [7294-7304]		1	1792.01	0.832	11.22		100	K.RFQVEQIGDNK.Y
FALSE	[R].QSSINAMNEK.[V]	1xOxidation [M7]; 1xTMT6plex [K10]; 1xTMT6plex [N-Term]	0.00596922	1	1	2	Q03001	Q03001 [4211-4220]		0	1595.85	0.743	38.71		100	R.QSSINAMNEK.V
FALSE	[K].LNDALDR.[L]	1xTMT6plex [N-Term]	0.00616547	2	2	1	Q03001; Q9UPN3	Q03001 [7166-7172]; Q9UPN3 [7010-7016]		0	1045.58	1.012	7.32	Shared	100	K.LNDALDR.L
FALSE	[K].GEEASQAQMRPK.[E]	1xOxidation [M9]; 1xTMT6plex [K12]; 1xTMT6plex [N-Term]	0.00639451	1	1	1	Q03001	Q03001 [5752-5763]		0	1805.96	0.74	41.64		100	K.GEEASQAQMRPK.E
FALSE	[R].LLNTTQK.[C]	1xTMT6plex [K7]; 1xTMT6plex [N-Term]	0.00639451	1	1	1	Q03001	Q03001 [3600-3606]		0	1275.8	0.701	27.69		100	R.LLNTTQK.C
FALSE	[K].NITLPDK.[M]	1xTMT6plex [K7]; 1xTMT6plex [N-Term]	0.00734391	1	1	1	Q03001	Q03001 [1929-1935]		0	1258.78	0.793	29.18		100	K.NITLPDK.M
FALSE	[K].LEVLNQR.[W]	1xTMT6plex [N-Term]	0.00755645	1	1	1	Q03001	Q03001 [6460-6466]		0	1100.66	1.536	87.81		100	K.LEVLNQR.W
FALSE	[K].ALVLEK.[T]	1xTMT6plex [K6]; 1xTMT6plex [N-Term]	0.00779564	1	1	2	Q03001	Q03001 [4340-4345]		0	1130.75	0.794	31.38		100	K.ALVLEK.T
FALSE	[K].WVSNISK.[T]	1xTMT6plex [K7]; 1xTMT6plex [N-Term]	0.00797596	1	1	1	Q03001	Q03001 [1452-1458]		0	1291.78			No Quan Values		K.WVSNISK.T
FALSE	[R].TLIDQHK.[E]	1xTMT6plex [K7]; 1xTMT6plex [N-Term]	0.00813383	1	1	1	Q03001	Q03001 [6960-6966]		0	1312.8	1.145	18.48		100	R.TLIDQHK.E
FALSE	[R].LTIEAYR.[A]	1xTMT6plex [N-Term]	0.00813383	1	1	1	Q03001	Q03001 [774-780]		0	1094.64	1.019	0.3		100	R.LTIEAYR.A
FALSE	[K].EQALSPR.[S]	1xTMT6plex [N-Term]	0.00813383	1	1	1	Q03001	Q03001 [3119-3125]		0	1029.59	0.879	15.89		100	K.EQALSPR.S
High	Q00610	Clathrin heavy chain 1 OS=Homo sapiens OX=9606 GN=CLTC PE=1 SV=5	463.62	44	60	215	60	1675	191.5	5.69	747.02	60	1213	CLTC	20409.7	22826.3	15802.9	26359.5	28294.1	18415.2
Checked	Annotated Sequence	Modifications	Qvality q-value	# Protein Groups	# Proteins	# PSMs	Master Protein Accessions	Positions in Master Proteins	Modifications in Master Proteins	# Missed Cleavages	Theo. MH+ [Da]	Abundance Ratio: (HO) / (WT)	Abundances (Grouped) CV [%]: HO	Quan Info	Channel Occupancy [%]	Sequence in Protein
FALSE	[K].IYIDSNNNPER.[F]	1xTMT6plex [N-Term]	0.00030973	1	1	7	Q00610	Q00610 [882-892]		0	1563.8	0.769	37.6		100	K.IYIDSNNNPER.F
FALSE	[K].LTDQLPLIIVCDR.[F]	1xCarbamidomethyl [C11]; 1xTMT6plex [N-Term]	0.00030973	1	2	4	Q00610	Q00610 [768-780]		0	1785.01	1.102	41.32		100	K.LTDQLPLIIVCDR.F
FALSE	[R].ISGETIFVTAPHEATAGIIGVNR.[K]	1xTMT6plex [N-Term]	0.00030973	1	1	3	Q00610	Q00610 [298-320]		0	2582.41	1	40.26		100	R.ISGETIFVTAPHEATAGIIGVNR.K
FALSE	[K].IVLDNSVFSEHR.[N]	1xTMT6plex [N-Term]	0.00030973	1	2	2	Q00610	Q00610 [1011-1022]		0	1644.89	1.111	21.32		100	K.IVLDNSVFSEHR.N
FALSE	[R].NNLAGAEELFAR.[K]	1xTMT6plex [N-Term]	0.00030973	1	1	5	Q00610	Q00610 [355-366]		0	1533.82	0.89	31.66		100	R.NNLAGAEELFAR.K
FALSE	[K].NNRPSEGPLQTR.[L]	1xTMT6plex [N-Term]	0.00030973	1	1	5	Q00610	Q00610 [572-583]		0	1597.86	0.891	23.64		100	K.NNRPSEGPLQTR.L
FALSE	[R].NLQNLLILTAIK.[A]	1xTMT6plex [K12]; 1xTMT6plex [N-Term]	0.00030973	1	2	2	Q00610	Q00610 [1023-1034]		0	1812.17	0.872	38.87		100	R.NLQNLLILTAIK.A
FALSE	[K].LDASESLR.[K]	1xTMT6plex [N-Term]	0.00030973	1	1	4	Q00610	Q00610 [1613-1620]		0	1119.62	0.953	32.35		100	K.LDASESLR.K
FALSE	[K].LECSEELGDLVK.[ST]	1xCarbamidomethyl [C3]; 1xTMT6plex [K12]; 1xTMT6plex [N-Term]	0.00030973	1	2	9	Q00610	Q00610 [457-468]		0	1850	0.956	40.02		100	K.LECSEELGDLVK.S
FALSE	[R].KDPELWGSVLLESNPYR.[R]	1xTMT6plex [K1]; 1xTMT6plex [N-Term]	0.00030973	1	1	1	Q00610	Q00610 [951-967]		1	2461.35	1.01	19.5		100	R.KDPELWGSVLLESNPYR.R
FALSE	[R].KFDVNTSAVQVLIEHIGNLDR.[A]	1xTMT6plex [K1]; 1xTMT6plex [N-Term]	0.00030973	1	1	1	Q00610	Q00610 [1074-1094]		1	2826.59	0.86	44		100	R.KFDVNTSAVQVLIEHIGNLDR.A
FALSE	[R].HSSLAGCQIINYR.[T]	1xCarbamidomethyl [C7]; 1xTMT6plex [N-Term]	0.00030973	1	1	1	Q00610	Q00610 [145-157]		0	1747.91	1.242	71.58		100	R.HSSLAGCQIINYR.T
FALSE	[R].LAELEEFINGPNNAHIQQVGDR.[C]	1xTMT6plex [N-Term]	0.00030973	1	1	2	Q00610	Q00610 [1183-1204]		0	2693.38	0.915	56.88		100	R.LAELEEFINGPNNAHIQQVGDR.C
FALSE	[K].LLYNNVSNFGR.[L]	1xTMT6plex [N-Term]	0.00030973	1	1	2	Q00610	Q00610 [1216-1226]		0	1525.83	0.858	41.1		100	K.LLYNNVSNFGR.L
FALSE	[R].LPVVIGGLLDVDCSEDVIK.[N]	1xCarbamidomethyl [C13]; 1xTMT6plex [K19]; 1xTMT6plex [N-Term]	0.00030973	1	1	3	Q00610	Q00610 [812-830]		0	2499.41	1.405	9.65		100	R.LPVVIGGLLDVDCSEDVIK.N
FALSE	[R].IHEGCEEPATHNALAK.[I]	1xCarbamidomethyl [C5]; 1xTMT6plex [K16]; 1xTMT6plex [N-Term]	0.00030973	1	1	7	Q00610	Q00610 [866-881]		0	2235.16	0.909	30.96		100	R.IHEGCEEPATHNALAK.I
FALSE	[K].LHIIEVGTPPTGNQPFPK.[K]	1xTMT6plex [K18]; 1xTMT6plex [N-Term]	0.00030973	1	1	3	Q00610	Q00610 [228-245]		0	2403.38	1.055	42.94		100	K.LHIIEVGTPPTGNQPFPK.K
FALSE	[K].LLLPWLEAR.[I]	1xTMT6plex [N-Term]	0.00030973	1	1	1	Q00610	Q00610 [857-865]		0	1339.83	0.973	10.79		100	K.LLLPWLEAR.I
FALSE	[K].VANVELYYR.[A]	1xTMT6plex [N-Term]	0.00030973	1	1	2	Q00610	Q00610 [1398-1406]		0	1355.75	0.858	31.94		100	K.VANVELYYR.A
FALSE	[K].VGEQAQVVIIDMNDPSNPIR.[R]	1xTMT6plex [N-Term]	0.00030973	1	1	2	Q00610	Q00610 [44-63]		0	2424.28	0.839	38.27		100	K.VGEQAQVVIIDMNDPSNPIR.R
FALSE	[K].VGEQAQVVIIDMNDPSNPIR.[R]	1xOxidation [M12]; 1xTMT6plex [N-Term]	0.00030973	1	1	3	Q00610	Q00610 [44-63]		0	2440.27	0.9	25.56		100	K.VGEQAQVVIIDMNDPSNPIR.R
FALSE	[K].TLQIFNIEMK.[S]	1xTMT6plex [K10]; 1xTMT6plex [N-Term]	0.00030973	1	2	2	Q00610	Q00610 [87-96]		0	1694.99	0.912	41.35		100	K.TLQIFNIEMK.S
FALSE	[K].TLQIFNIEMK.[S]	1xOxidation [M9]; 1xTMT6plex [K10]; 1xTMT6plex [N-Term]	0.00030973	1	2	1	Q00610	Q00610 [87-96]		0	1710.99	0.852	34.41		100	K.TLQIFNIEMK.S
FALSE	[R].TSIDAYDNFDNISLAQR.[L]	1xTMT6plex [N-Term]	0.00030973	1	1	10	Q00610	Q00610 [1482-1498]		0	2172.08	0.999	36.01		100	R.TSIDAYDNFDNISLAQR.L
FALSE	[K].WLLLTGISAQQNR.[V]	1xTMT6plex [N-Term]	0.00030973	1	1	2	Q00610	Q00610 [164-176]		0	1729	0.925	26.48		100	K.WLLLTGISAQQNR.V
FALSE	[R].VVGAMQLYSVDR.[K]	1xOxidation [M5]; 1xTMT6plex [N-Term]	0.00030973	1	2	5	Q00610	Q00610 [177-188]		0	1582.85	0.844	39.92		100	R.VVGAMQLYSVDR.K
FALSE	[R].VVGAMQLYSVDR.[K]	1xTMT6plex [N-Term]	0.00030973	1	2	3	Q00610	Q00610 [177-188]		0	1566.85	0.831	40.85		100	R.VVGAMQLYSVDR.K
FALSE	[K].YESLELCRPVLQQGR.[K]	1xCarbamidomethyl [C7]; 1xTMT6plex [N-Term]	0.00030973	1	1	3	Q00610	Q00610 [430-444]		0	2077.11	0.873	21.79		100	K.YESLELCRPVLQQGR.K
FALSE	[K].VGYTPDWIFLLR.[NG]	1xTMT6plex [N-Term]	0.00030973	1	2	1	Q00610	Q00610 [508-519]		0	1708.96	0.927	40.72		100	K.VGYTPDWIFLLR.N
FALSE	[K].VIQCFAETGQVQK.[I]	1xCarbamidomethyl [C4]; 1xTMT6plex [K13]; 1xTMT6plex [N-Term]	0.00030973	1	1	4	Q00610	Q00610 [488-500]		0	1966.08	0.866	34.92		100	K.VIQCFAETGQVQK.I
FALSE	[R].RPISADSAIMNPASK.[V]	1xOxidation [M10]; 1xTMT6plex [K15]; 1xTMT6plex [N-Term]	0.00030973	1	1	6	Q00610	Q00610 [64-78]		0	2032.13	0.861	28.72		100	R.RPISADSAIMNPASK.V
FALSE	[R].RPISADSAIMNPASK.[V]	1xTMT6plex [K15]; 1xTMT6plex [N-Term]	0.00030973	1	1	4	Q00610	Q00610 [64-78]		0	2016.13	0.879	24.74		100	R.RPISADSAIMNPASK.V
FALSE	[K].RDPHLACVAYER.[G]	1xCarbamidomethyl [C7]; 1xTMT6plex [N-Term]	0.00030973	1	2	1	Q00610	Q00610 [912-923]		1	1715.88	0.846	24.54		100	K.RDPHLACVAYER.G
FALSE	[K].SVNESLNNLFITEEDYQALR.[T]	1xTMT6plex [N-Term]	0.00030973	1	1	3	Q00610	Q00610 [1462-1481]		0	2584.31	0.755	45.41		100	K.SVNESLNNLFITEEDYQALR.T
FALSE	[K].EVCFACVDGK.[E]	2xCarbamidomethyl [C3; C6]; 1xTMT6plex [K10]; 1xTMT6plex [N-Term]	0.00030973	1	1	1	Q00610	Q00610 [1255-1264]		0	1642.83	0.813	48.09		100	K.EVCFACVDGK.E
FALSE	[K].FDVNTSAVQVLIEHIGNLDR.[A]	1xTMT6plex [N-Term]	0.00030973	1	1	1	Q00610	Q00610 [1075-1094]		0	2469.33	0.918	23.54		100	K.FDVNTSAVQVLIEHIGNLDR.A
FALSE	[R].AHIAQLCEK.[A]	1xCarbamidomethyl [C7]; 1xTMT6plex [K9]; 1xTMT6plex [N-Term]	0.00030973	1	2	2	Q00610	Q00610 [611-619]		0	1527.87	0.883	41.9		100	R.AHIAQLCEK.A
FALSE	[K].AVDVFFPPEAQNDFPVAMQISEK.[H]	1xOxidation [M18]; 1xTMT6plex [K23]; 1xTMT6plex [N-Term]	0.00030973	1	1	2	Q00610	Q00610 [247-269]		0	3053.57	0.817	23.13		100	K.AVDVFFPPEAQNDFPVAMQISEK.H
FALSE	[K].FNALFAQGNYSEAAK.[V]	1xTMT6plex [K15]; 1xTMT6plex [N-Term]	0.00030973	1	1	3	Q00610	Q00610 [368-382]		0	2089.11	0.822	40.8		100	K.FNALFAQGNYSEAAK.V
FALSE	[K].AHTMTDDVTFWK.[W]	1xOxidation [M4]; 1xTMT6plex [K12]; 1xTMT6plex [N-Term]	0.00030973	1	1	2	Q00610	Q00610 [101-112]		0	1925.98	0.78	28.01		100	K.AHTMTDDVTFWK.W
FALSE	[K].AVDVFFPPEAQNDFPVAMQISEK.[H]	1xTMT6plex [K23]; 1xTMT6plex [N-Term]	0.00030973	1	1	2	Q00610	Q00610 [247-269]		0	3037.57	0.973	46.7		100	K.AVDVFFPPEAQNDFPVAMQISEK.H
FALSE	[R].FQSVPAQPGQTSPLLQYFGILLDQGQLNK.[Y]	1xTMT6plex [K29]; 1xTMT6plex [N-Term]	0.00030973	1	1	2	Q00610	Q00610 [401-429]		0	3646	0.876	48.57		100	R.FQSVPAQPGQTSPLLQYFGILLDQGQLNK.Y
FALSE	[K].EAIDSYIK.[A]	1xTMT6plex [K8]; 1xTMT6plex [N-Term]	0.00030973	1	1	4	Q00610	Q00610 [1123-1130]		0	1396.81	0.885	42.43		100	K.EAIDSYIK.A
FALSE	[K].ADDPSSYMEVVQAANTSGNWEELVK.[Y]	1xOxidation [M8]; 1xTMT6plex [K25]; 1xTMT6plex [N-Term]	0.00030973	1	1	2	Q00610	Q00610 [1131-1155]		0	3214.56	0.991	37.96		100	K.ADDPSSYMEVVQAANTSGNWEELVK.Y
FALSE	[R].CNEPAVWSQLAK.[A]	1xCarbamidomethyl [C1]; 1xTMT6plex [K12]; 1xTMT6plex [N-Term]	0.00030973	1	1	4	Q00610	Q00610 [1102-1113]		0	1861	0.849	39.06		100	R.CNEPAVWSQLAK.A
FALSE	[K].DAMQYASESK.[D]	1xTMT6plex [K10]; 1xTMT6plex [N-Term]	0.00030973	1	1	5	Q00610	Q00610 [1536-1545]		0	1587.81	0.862	46.97		100	K.DAMQYASESK.D
FALSE	[K].DAMQYASESK.[D]	1xOxidation [M3]; 1xTMT6plex [K10]; 1xTMT6plex [N-Term]	0.00030973	1	1	6	Q00610	Q00610 [1536-1545]		0	1603.8	0.866	37.15		100	K.DAMQYASESK.D
FALSE	[K].HDVVFLITK.[Y]	1xTMT6plex [K9]; 1xTMT6plex [N-Term]	0.00030973	1	1	3	Q00610	Q00610 [270-278]		0	1529.95	0.852	23.03		100	K.HDVVFLITK.Y
FALSE	[R].GQCDLELINVCNENSLFK.[S]	2xCarbamidomethyl [C3; C11]; 1xTMT6plex [K18]; 1xTMT6plex [N-Term]	0.00030973	1	1	2	Q00610	Q00610 [924-941]		0	2611.33	0.915	50.69		100	R.GQCDLELINVCNENSLFK.S
FALSE	[R].GQFSTDELVAEVEK.[R]	1xTMT6plex [K14]; 1xTMT6plex [N-Term]	0.00030973	1	2	12	Q00610	Q00610 [838-851]		0	2010.08	0.932	34.55		100	R.GQFSTDELVAEVEK.R
FALSE	[K].DPELWGSVLLESNPYR.[R]	1xTMT6plex [N-Term]	0.00030973	1	1	1	Q00610	Q00610 [952-967]		0	2104.09	1.202	24.54		100	K.DPELWGSVLLESNPYR.R
FALSE	[K].AFMTADLPNELIELLEK.[I]	1xOxidation [M3]; 1xTMT6plex [K17]; 1xTMT6plex [N-Term]	0.00030973	1	2	2	Q00610	Q00610 [994-1010]		0	2421.34	1.119	10.24		100	K.AFMTADLPNELIELLEK.I
FALSE	[K].AFMTADLPNELIELLEK.[I]	1xTMT6plex [K17]; 1xTMT6plex [N-Term]	0.00030973	1	2	1	Q00610	Q00610 [994-1010]		0	2405.34	1.033	35.55		100	K.AFMTADLPNELIELLEK.I
FALSE	[R].AYEFAER.[C]	1xTMT6plex [N-Term]	0.000568404	1	2	6	Q00610	Q00610 [1095-1101]		0	1114.57	0.887	31.2		100	R.AYEFAER.C
FALSE	[K].YIQAACK.[T]	1xCarbamidomethyl [C6]; 1xTMT6plex [K7]; 1xTMT6plex [N-Term]	0.000568404	1	2	4	Q00610	Q00610 [731-737]		0	1311.75	0.774	40.15		100	K.YIQAACK.T
FALSE	[R].VVGAMQLYSVDRK.[V]	1xTMT6plex [K13]; 1xTMT6plex [N-Term]	0.000568404	1	2	1	Q00610	Q00610 [177-189]		1	1924.11	0.77	10.73		100	R.VVGAMQLYSVDRK.V
FALSE	[R].ESNCYDPER.[V]	1xCarbamidomethyl [C4]; 1xTMT6plex [N-Term]	0.000568404	1	1	3	Q00610	Q00610 [750-758]		0	1398.62	0.93	20.93		100	R.ESNCYDPER.V
FALSE	[R].ENPYYDSR.[V]	1xTMT6plex [N-Term]	0.000568404	1	1	3	Q00610	Q00610 [896-903]		0	1272.61	0.816	38.9		100	R.ENPYYDSR.V
FALSE	[K].VAANAPK.[G]	1xTMT6plex [K7]; 1xTMT6plex [N-Term]	0.000568404	1	1	7	Q00610	Q00610 [383-389]		0	1128.71	0.924	19.59		100	K.VAANAPK.G
FALSE	[R].IAAYLFK.[G]	1xTMT6plex [K7]; 1xTMT6plex [N-Term]	0.00139174	1	1	1	Q00610	Q00610 [1510-1516]		0	1283.81	0.746	46.63		100	R.IAAYLFK.G
FALSE	[R].AMLSANIR.[Q]	1xTMT6plex [N-Term]	0.00139174	1	1	1	Q00610	Q00610 [669-676]		0	1104.64	0.761	30.08		100	R.AMLSANIR.Q
FALSE	[K].NLILVVR.[G]	1xTMT6plex [N-Term]	0.00164966	1	1	2	Q00610	Q00610 [831-837]		0	1055.71	0.844	36.55		100	K.NLILVVR.G
FALSE	[R].AMLSANIR.[Q]	1xOxidation [M2]; 1xTMT6plex [N-Term]	0.00237856	1	1	2	Q00610	Q00610 [669-676]		0	1120.63	1.037	49.17		100	R.AMLSANIR.Q
FALSE	[R].DPHLACVAYER.[G]	1xCarbamidomethyl [C6]; 1xTMT6plex [N-Term]	0.00237856	1	2	1	Q00610	Q00610 [913-923]		0	1559.78	0.727	17.42		100	R.DPHLACVAYER.G
FALSE	[K].QSVELCK.[K]	1xCarbamidomethyl [C6]; 1xTMT6plex [K7]; 1xTMT6plex [N-Term]	0.00237856	1	1	2	Q00610	Q00610 [1523-1529]		0	1321.75	0.908	41.57		100	K.QSVELCK.K
FALSE	[K].HELIEFR.[R]	1xTMT6plex [N-Term]	0.00333498	1	1	8	Q00610	Q00610 [1502-1508]		0	1172.66	1.041	3.54		100	K.HELIEFR.R
FALSE	[R].VMEYINR.[L]	1xTMT6plex [N-Term]	0.00333498	1	1	2	Q00610	Q00610 [1040-1046]		0	1153.62	0.91	40.52		100	R.VMEYINR.L
FALSE	[R].AVNYFSK.[V]	1xTMT6plex [K7]; 1xTMT6plex [N-Term]	0.00596922	1	1	1	Q00610	Q00610 [1435-1441]		0	1286.75	0.812	48.21		100	R.AVNYFSK.V
High	Q9P2E9	Ribosome-binding protein 1 OS=Homo sapiens OX=9606 GN=RRBP1 PE=1 SV=5	419.866	66	78	212	78	1410	152.4	8.6	645.46	78			21622.6	21659.6	17928.1	26078.5	25644.2	18294.2
Checked	Annotated Sequence	Modifications	Qvality q-value	# Protein Groups	# Proteins	# PSMs	Master Protein Accessions	Positions in Master Proteins	Modifications in Master Proteins	# Missed Cleavages	Theo. MH+ [Da]	Abundance Ratio: (HO) / (WT)	Abundances (Grouped) CV [%]: HO	Quan Info	Channel Occupancy [%]	Sequence in Protein
FALSE	[K].LTAEFEEAQTSACR.[L]	1xCarbamidomethyl [C13]; 1xTMT6plex [N-Term]	0.00030973	1	1	4	Q9P2E9	Q9P2E9 [1311-1324]		0	1841.89	1.007	28.6		100	K.LTAEFEEAQTSACR.L
FALSE	[K].LQSSEAEVR.[S]	1xTMT6plex [N-Term]	0.00030973	1	1	2	Q9P2E9	Q9P2E9 [922-930]		0	1247.68	1.131	15.13		100	K.LQSSEAEVR.S
FALSE	[R].QLLLESQSQLDAAK.[S]	1xTMT6plex [K14]; 1xTMT6plex [N-Term]	0.00030973	1	1	2	Q9P2E9	Q9P2E9 [1228-1241]		0	2002.16	0.987	23.12		100	R.QLLLESQSQLDAAK.S
FALSE	[R].NTDVAQSPEAPK.[Q]	1xTMT6plex [K12]; 1xTMT6plex [N-Term]	0.00030973	1	1	5	Q9P2E9	Q9P2E9 [609-620]		0	1714.94	0.956	32.54		100	R.NTDVAQSPEAPK.Q
FALSE	[K].KADAAANQGK.[K]	2xTMT6plex [K1; K10]; 1xTMT6plex [N-Term]	0.00030973	1	1	2	Q9P2E9	Q9P2E9 [589-598]		1	1660.99	1.095	7.42		100	K.KADAAANQGK.K
FALSE	[K].KADSVANQGTK.[V]	2xTMT6plex [K1; K11]; 1xTMT6plex [N-Term]	0.00030973	1	1	1	Q9P2E9	Q9P2E9 [549-559]		1	1806.07	0.916	37.82		100	K.KADSVANQGTK.V
FALSE	[K].KAEGAQNQGK.[K]	2xTMT6plex [K1; K10]; 1xTMT6plex [N-Term]	0.00030973	1	1	3	Q9P2E9	Q9P2E9 [261-270]; [311-320]; [331-340]; [341-350]; [351-360]; [361-370]; [371-380]; [381-390]; [401-410]; [411-420]; [421-430]; [431-440]; [441-450]; [451-460]; [461-470]; [481-490]; [491-500]		1	1718.02	0.83	53.01		100	K.KAEGAQNQGK.K; K.KAEGAQNQGK.K; K.KAEGAQNQGK.K; K.KAEGAQNQGK.K; K.KAEGAQNQGK.K; K.KAEGAQNQGK.K; K.KAEGAQNQGK.K; K.KAEGAQNQGK.K; K.KAEGAQNQGK.K; K.KAEGAQNQGK.K; K.KAEGAQNQGK.K; K.KAEGAQNQGK.K; K.KAEGAQNQGK.K; K.KAEGAQNQGK.K; K.KAEGAQNQGK.K; K.KAEGAQNQGK.K; K.KAEGAQNQGK.K
FALSE	[RK].KAEGTPNQGK.[K]	2xTMT6plex [K1; K10]; 1xTMT6plex [N-Term]	0.00030973	1	1	1	Q9P2E9	Q9P2E9 [221-230]; [241-250]; [251-260]		1	1717.02	0.795	53.73		100	R.KAEGTPNQGK.K; K.KAEGTPNQGK.K; K.KAEGTPNQGK.K
FALSE	[K].KGEGAPIQGK.[K]	2xTMT6plex [K1; K10]; 1xTMT6plex [N-Term]	0.00030973	1	1	2	Q9P2E9	Q9P2E9 [539-548]		1	1672.04	0.944	24.42		100	K.KGEGAPIQGK.K
FALSE	[K].HLEEIVEK.[L]	1xTMT6plex [K8]; 1xTMT6plex [N-Term]	0.00030973	1	1	4	Q9P2E9	Q9P2E9 [1176-1183]		0	1454.86	1.082	10.14		100	K.HLEEIVEK.L
FALSE	[K].HPPAPAEPSSDLASK.[L]	1xTMT6plex [K15]; 1xTMT6plex [N-Term]	0.00030973	1	1	4	Q9P2E9	Q9P2E9 [1099-1113]		0	1962.07	1.079	1.29		100	K.HPPAPAEPSSDLASK.L
FALSE	[K].KVEGAQNQGK.[K]	2xTMT6plex [K1; K10]; 1xTMT6plex [N-Term]	0.00030973	1	1	3	Q9P2E9	Q9P2E9 [301-310]; [391-400]; [471-480]		1	1746.05	0.894	35.32		100	K.KVEGAQNQGK.K; K.KVEGAQNQGK.K; K.KVEGAQNQGK.K
FALSE	[K].KVDTTPNQGK.[K]	2xTMT6plex [K1; K10]; 1xTMT6plex [N-Term]	0.00030973	1	1	3	Q9P2E9	Q9P2E9 [271-280]		1	1775.06	0.941	34.76		100	K.KVDTTPNQGK.K
FALSE	[K].KTEGAQGK.[K]	2xTMT6plex [K1; K8]; 1xTMT6plex [N-Term]	0.00030973	1	1	2	Q9P2E9	Q9P2E9 [521-528]		1	1505.93	0.876	37.84		100	K.KTEGAQGK.K
FALSE	[RK].LQQENSILR.[DN]	1xTMT6plex [N-Term]	0.00030973	1	2	2	Q9P2E9	Q9P2E9 [798-806]		0	1329.77	0.911	24.8		100	R.LQQENSILR.D
FALSE	[K].IPDHDPAPNVTVLLR.[E]	1xTMT6plex [N-Term]	0.00030973	1	1	1	Q9P2E9	Q9P2E9 [83-97]		0	1886.07	1.452	75.77		100	K.IPDHDPAPNVTVLLR.E
FALSE	[KR].IQEEIEK.[IKL]	1xTMT6plex [K7]; 1xTMT6plex [N-Term]	0.00030973	1	4	12	Q9P2E9	Q9P2E9 [1325-1331]		0	1346.79	1.008	24.96		100	R.LQEELEK.L
FALSE	[K].LLATEQEDAAVAK.[S]	1xTMT6plex [K13]; 1xTMT6plex [N-Term]	0.00030973	1	1	5	Q9P2E9	Q9P2E9 [708-720]		0	1817.04	1.01	23.98		100	K.LLATEQEDAAVAK.S
FALSE	[R].LIEILSEK.[A]	1xTMT6plex [K8]; 1xTMT6plex [N-Term]	0.00030973	1	1	2	Q9P2E9	Q9P2E9 [670-677]		0	1402.89	1	37.81		100	R.LIEILSEK.A
FALSE	[K].VEPAVSSVVNSIQVLTSK.[A]	1xTMT6plex [K18]; 1xTMT6plex [N-Term]	0.00030973	1	1	2	Q9P2E9	Q9P2E9 [149-166]		0	2315.36	1.129	24.71		100	K.VEPAVSSVVNSIQVLTSK.A
FALSE	[K].VGAAEEELQK.[S]	1xTMT6plex [K10]; 1xTMT6plex [N-Term]	0.00030973	1	1	3	Q9P2E9	Q9P2E9 [1160-1169]		0	1531.87	1.028	26.36		100	K.VGAAEEELQK.S
FALSE	[K].VEGITNQGK.[K]	1xTMT6plex [K9]; 1xTMT6plex [N-Term]	0.00030973	1	1	2	Q9P2E9	Q9P2E9 [560-568]		0	1403.83	1.006	29.64		100	K.VEGITNQGK.K
FALSE	[K].VEGAQNQGK.[K]	1xTMT6plex [K9]; 1xTMT6plex [N-Term]	0.00030973	1	1	2	Q9P2E9	Q9P2E9 [302-310]; [392-400]; [472-480]		0	1388.79	1.021	32.95		100	K.VEGAQNQGK.K; K.VEGAQNQGK.K; K.VEGAQNQGK.K
FALSE	[K].TLVSTVGSMVFNEGEAQR.[L]	1xTMT6plex [N-Term]	0.00030973	1	1	1	Q9P2E9	Q9P2E9 [652-669]		0	2154.11	1.074	16.6		100	K.TLVSTVGSMVFNEGEAQR.L
FALSE	[K].TLVSTVGSMVFNEGEAQR.[L]	1xOxidation [M9]; 1xTMT6plex [N-Term]	0.00030973	1	1	3	Q9P2E9	Q9P2E9 [652-669]		0	2170.1	1.08	19.36		100	K.TLVSTVGSMVFNEGEAQR.L
FALSE	[R].TLQEQLENGPNTQLAR.[L]	1xTMT6plex [N-Term]	0.00030973	1	1	2	Q9P2E9	Q9P2E9 [782-797]		0	2041.09	0.981	22.5		100	R.TLQEQLENGPNTQLAR.L
FALSE	[K].TTQEQLAR.[E]	1xTMT6plex [N-Term]	0.00030973	1	1	4	Q9P2E9	Q9P2E9 [1376-1383]		0	1175.66	1.006	15.22		100	K.TTQEQLAR.E
FALSE	[K].TQLEWTEAILEDEQTQR.[Q]	1xTMT6plex [N-Term]	0.00030973	1	1	3	Q9P2E9	Q9P2E9 [1292-1308]		0	2319.17	1.001	34.36		100	K.TQLEWTEAILEDEQTQR.Q
FALSE	[R].SILAETEGMLR.[D]	1xTMT6plex [N-Term]	0.00030973	1	1	1	Q9P2E9	Q9P2E9 [1133-1143]		0	1448.8	1.121	39.01		100	R.SILAETEGMLR.D
FALSE	[R].SIEALLEAGQAR.[D]	1xTMT6plex [N-Term]	0.00030973	1	1	5	Q9P2E9	Q9P2E9 [959-970]		0	1486.84	1.113	31.91		100	R.SIEALLEAGQAR.D
FALSE	[K].SHVEDGDIAGAPASSPEAPPAEQDPVQLK.[T]	1xTMT6plex [K29]; 1xTMT6plex [N-Term]	0.00030973	1	1	1	Q9P2E9	Q9P2E9 [1263-1291]		0	3370.72	0.702	27.94		100	K.SHVEDGDIAGAPASSPEAPPAEQDPVQLK.T
FALSE	[K].QSDELALVR.[Q]	1xTMT6plex [N-Term]	0.00030973	1	1	4	Q9P2E9	Q9P2E9 [1247-1255]		0	1259.72	0.919	34.84		100	K.QSDELALVR.Q
FALSE	[R].TAGPLESSETEEASQLK.[E]	1xTMT6plex [K17]; 1xTMT6plex [N-Term]	0.00030973	1	1	4	Q9P2E9	Q9P2E9 [1334-1350]		0	2235.18	1.053	36.15		100	R.TAGPLESSETEEASQLK.E
FALSE	[K].TEGTPNQGK.[K]	1xTMT6plex [K9]; 1xTMT6plex [N-Term]	0.00030973	1	1	2	Q9P2E9	Q9P2E9 [232-240]		0	1389.77	0.949	36.12		100	K.TEGTPNQGK.K
FALSE	[K].EVPMVVVPPVGAK.[G]	1xTMT6plex [K13]; 1xTMT6plex [N-Term]	0.00030973	1	1	2	Q9P2E9	Q9P2E9 [176-188]		0	1780.08	0.947	21.56		100	K.EVPMVVVPPVGAK.G
FALSE	[K].EVPMVVVPPVGAK.[G]	1xOxidation [M4]; 1xTMT6plex [K13]; 1xTMT6plex [N-Term]	0.00030973	1	1	3	Q9P2E9	Q9P2E9 [176-188]		0	1796.08	1.147	12.71		100	K.EVPMVVVPPVGAK.G
FALSE	[K].EVQQLQGK.[I]	1xTMT6plex [K8]; 1xTMT6plex [N-Term]	0.00030973	1	1	2	Q9P2E9	Q9P2E9 [772-779]		0	1387.83	0.9	32.87		100	K.EVQQLQGK.I
FALSE	[R].EAEETQSTLQAECDQYR.[S]	1xCarbamidomethyl [C13]; 1xTMT6plex [N-Term]	0.00030973	1	1	2	Q9P2E9	Q9P2E9 [1116-1132]		0	2287.03	0.951	26.65		100	R.EAEETQSTLQAECDQYR.S
FALSE	[K].ETSYEEALANQR.[K]	1xTMT6plex [N-Term]	0.00030973	1	1	2	Q9P2E9	Q9P2E9 [35-46]		0	1639.81	1.146	14.79		100	K.ETSYEEALANQR.K
FALSE	[K].ELESQVSGLEK.[E]	1xTMT6plex [K11]; 1xTMT6plex [N-Term]	0.00030973	1	1	3	Q9P2E9	Q9P2E9 [991-1001]		0	1676.95	0.882	25.51		100	K.ELESQVSGLEK.E
FALSE	[K].AQEQQQQMAELHSK.[L]	1xOxidation [M8]; 1xTMT6plex [K14]; 1xTMT6plex [N-Term]	0.00030973	1	1	1	Q9P2E9	Q9P2E9 [908-921]		0	2130.1	0.923	20.27		100	K.AQEQQQQMAELHSK.L
FALSE	[K].AQEQQQQMAELHSK.[L]	1xTMT6plex [K14]; 1xTMT6plex [N-Term]	0.00030973	1	1	1	Q9P2E9	Q9P2E9 [908-921]		0	2114.11	0.947	35		100	K.AQEQQQQMAELHSK.L
FALSE	[R].EQEITAVQAR.[M]	1xTMT6plex [N-Term]	0.00030973	1	1	2	Q9P2E9	Q9P2E9 [752-761]		0	1373.76	0.994	33.36		100	R.EQEITAVQAR.M
FALSE	[R].ESEEALQK.[R]	1xTMT6plex [K8]; 1xTMT6plex [N-Term]	0.00030973	1	1	2	Q9P2E9	Q9P2E9 [875-882]		0	1391.78	1.059	25.34		100	R.ESEEALQK.R
FALSE	[R].APAVAVAPTPVQPPIIVAPVATVPAMPQEK.[L]	1xOxidation [M26]; 1xTMT6plex [K30]; 1xTMT6plex [N-Term]	0.00030973	1	1	2	Q9P2E9	Q9P2E9 [102-131]		0	3433.99	1.009	21.43		100	R.APAVAVAPTPVQPPIIVAPVATVPAMPQEK.L
FALSE	[R].APAVAVAPTPVQPPIIVAPVATVPAMPQEK.[L]	1xTMT6plex [K30]; 1xTMT6plex [N-Term]	0.00030973	1	1	1	Q9P2E9	Q9P2E9 [102-131]		0	3417.99	0.956	30.94		100	R.APAVAVAPTPVQPPIIVAPVATVPAMPQEK.L
FALSE	[K].GNTPATGTTQGK.[K]	1xTMT6plex [K12]; 1xTMT6plex [N-Term]	0.00030973	1	1	2	Q9P2E9	Q9P2E9 [189-200]		0	1590.89	0.98	23.87		100	K.GNTPATGTTQGK.K
FALSE	[K].AEDGSSSK.[E]	1xTMT6plex [K8]; 1xTMT6plex [N-Term]	0.00030973	1	1	1	Q9P2E9	Q9P2E9 [1398-1405]		0	1238.66	1.133	0.05		100	K.AEDGSSSK.E
FALSE	[K].AEGAQNQGQK.[G]	1xTMT6plex [K10]; 1xTMT6plex [N-Term]	0.00030973	1	1	4	Q9P2E9	Q9P2E9 [502-511]		0	1488.82	1.071	22.45		100	K.AEGAQNQGQK.G
FALSE	[K].AEGAQNQGKK.[VGA]	2xTMT6plex [K9; K10]; 1xTMT6plex [N-Term]	0.00030973	1	1	1	Q9P2E9	Q9P2E9 [262-271]; [312-321]; [332-341]; [342-351]; [352-361]; [362-371]; [372-381]; [382-391]; [402-411]; [412-421]; [422-431]; [432-441]; [442-451]; [452-461]; [462-471]; [482-491]; [492-501]		1	1718.02	0.834	43.7		100	K.AEGAQNQGKK.V; K.AEGAQNQGKK.G; K.AEGAQNQGKK.A; K.AEGAQNQGKK.A; K.AEGAQNQGKK.A; K.AEGAQNQGKK.A; K.AEGAQNQGKK.A; K.AEGAQNQGKK.V; K.AEGAQNQGKK.A; K.AEGAQNQGKK.A; K.AEGAQNQGKK.A; K.AEGAQNQGKK.A; K.AEGAQNQGKK.A; K.AEGAQNQGKK.A; K.AEGAQNQGKK.V; K.AEGAQNQGKK.A; K.AEGAQNQGKK.A
FALSE	[K].AEGAQNQGK.[K]	1xTMT6plex [K9]; 1xTMT6plex [N-Term]	0.00030973	1	1	15	Q9P2E9	Q9P2E9 [262-270]; [312-320]; [332-340]; [342-350]; [352-360]; [362-370]; [372-380]; [382-390]; [402-410]; [412-420]; [422-430]; [432-440]; [442-450]; [452-460]; [462-470]; [482-490]; [492-500]		0	1360.76	0.987	29.37		100	K.AEGAQNQGK.K; K.AEGAQNQGK.K; K.AEGAQNQGK.K; K.AEGAQNQGK.K; K.AEGAQNQGK.K; K.AEGAQNQGK.K; K.AEGAQNQGK.K; K.AEGAQNQGK.K; K.AEGAQNQGK.K; K.AEGAQNQGK.K; K.AEGAQNQGK.K; K.AEGAQNQGK.K; K.AEGAQNQGK.K; K.AEGAQNQGK.K; K.AEGAQNQGK.K; K.AEGAQNQGK.K; K.AEGAQNQGK.K
FALSE	[K].AEGAQNQAK.[K]	1xTMT6plex [K9]; 1xTMT6plex [N-Term]	0.00030973	1	1	6	Q9P2E9	Q9P2E9 [292-300]		0	1374.77	0.95	28.69		100	K.AEGAQNQAK.K
FALSE	[K].ADSVANQGTK.[V]	1xTMT6plex [K10]; 1xTMT6plex [N-Term]	0.00030973	1	1	3	Q9P2E9	Q9P2E9 [550-559]		0	1448.81	0.995	20.56		100	K.ADSVANQGTK.V
FALSE	[K].AAILETAPK.[E]	1xTMT6plex [K9]; 1xTMT6plex [N-Term]	0.00030973	1	1	5	Q9P2E9	Q9P2E9 [167-175]		0	1371.86	0.985	27.88		100	K.AAILETAPK.E
FALSE	[R].DALNQATSQVESK.[Q]	1xTMT6plex [K13]; 1xTMT6plex [N-Term]	0.00030973	1	1	1	Q9P2E9	Q9P2E9 [807-819]		0	1849.01			No Quan Values		R.DALNQATSQVESK.Q
FALSE	[R].DAQDVQASQAEADQQQTR.[L]	1xTMT6plex [N-Term]	0.00030973	1	1	2	Q9P2E9	Q9P2E9 [971-988]		0	2218.05	0.907	13.34		100	R.DAQDVQASQAEADQQQTR.L
FALSE	[K].ADAAANQGK.[K]	1xTMT6plex [K9]; 1xTMT6plex [N-Term]	0.00030973	1	1	4	Q9P2E9	Q9P2E9 [590-598]		0	1303.74	1.001	10.92		100	K.ADAAANQGK.K
FALSE	[K].GDPVAILK.[R]	1xTMT6plex [K8]; 1xTMT6plex [N-Term]	0.00030973	1	1	3	Q9P2E9	Q9P2E9 [692-699]		0	1270.81	0.937	38.23		100	K.GDPVAILK.R
FALSE	[R].AENSQLTER.[I]	1xTMT6plex [N-Term]	0.00030973	1	1	1	Q9P2E9	Q9P2E9 [948-956]		0	1276.67	1.037	22.66		100	R.AENSQLTER.I
FALSE	[K].AEGTPNQGK.[K]	1xTMT6plex [K9]; 1xTMT6plex [N-Term]	0.00030973	1	1	8	Q9P2E9	Q9P2E9 [222-230]; [242-250]; [252-260]		0	1359.76	0.968	23.31		100	K.AEGTPNQGK.K; K.AEGTPNQGK.K; K.AEGTPNQGK.K
FALSE	[K].AEGTQNQSK.[K]	1xTMT6plex [K9]; 1xTMT6plex [N-Term]	0.00030973	1	1	4	Q9P2E9	Q9P2E9 [202-210]		0	1420.78	1.054	18.26		100	K.AEGTQNQSK.K
FALSE	[K].AEGSPNQGK.[K]	1xTMT6plex [K9]; 1xTMT6plex [N-Term]	0.00030973	1	1	3	Q9P2E9	Q9P2E9 [580-588]		0	1345.75	1.071	12.63		100	K.AEGSPNQGK.K
FALSE	[K].GEGAQNQGK.[K]	1xTMT6plex [K9]; 1xTMT6plex [N-Term]	0.00030973	1	1	5	Q9P2E9	Q9P2E9 [322-330]; [512-520]		0	1346.74	1.077	25.95		100	K.GEGAQNQGK.K; K.GEGAQNQGK.K
FALSE	[K].GEGAPIQGK.[K]	1xTMT6plex [K9]; 1xTMT6plex [N-Term]	0.00030973	1	1	1	Q9P2E9	Q9P2E9 [540-548]		0	1314.78	1.036	11.7		100	K.GEGAPIQGK.K
FALSE	[K].GELESSDQVR.[E]	1xTMT6plex [N-Term]	0.00030973	1	1	1	Q9P2E9	Q9P2E9 [1186-1195]		0	1348.69	1.073	19.85		100	K.GELESSDQVR.E
FALSE	[K].TEGAQGK.[K]	1xTMT6plex [K7]; 1xTMT6plex [N-Term]	0.000568404	1	1	3	Q9P2E9	Q9P2E9 [522-528]		0	1148.67	1.138	25.8		100	K.TEGAQGK.K
FALSE	[R].SILAETEGMLR.[D]	1xOxidation [M9]; 1xTMT6plex [N-Term]	0.000568404	1	1	1	Q9P2E9	Q9P2E9 [1133-1143]		0	1464.79	0.93	26.36		100	R.SILAETEGMLR.D
FALSE	[K].AGIIQDTWHK.[A]	1xTMT6plex [K10]; 1xTMT6plex [N-Term]	0.000568404	1	1	1	Q9P2E9	Q9P2E9 [678-687]		0	1626.94			No Quan Values		K.AGIIQDTWHK.A
FALSE	[K].KTEGTPNQGK.[K]	2xTMT6plex [K1; K10]; 1xTMT6plex [N-Term]	0.000568404	1	1	1	Q9P2E9	Q9P2E9 [231-240]		1	1747.03	0.938	32.99		100	K.KTEGTPNQGK.K
FALSE	[K].HMAAASAECQNYAK.[E]	1xCarbamidomethyl [C9]; 1xOxidation [M2]; 1xTMT6plex [K14]; 1xTMT6plex [N-Term]	0.000568404	1	1	1	Q9P2E9	Q9P2E9 [1208-1221]		0	2025.99	0.786	13		100	K.HMAAASAECQNYAK.E
FALSE	[K].AEGSPSEGK.[K]	1xTMT6plex [K9]; 1xTMT6plex [N-Term]	0.000568404	1	1	1	Q9P2E9	Q9P2E9 [570-578]		0	1319.72	1.177	13.84		100	K.AEGSPSEGK.K
FALSE	[K].VDTTPNQGK.[K]	1xTMT6plex [K9]; 1xTMT6plex [N-Term]	0.000568404	1	1	2	Q9P2E9	Q9P2E9 [272-280]		0	1417.81	1.957	23.12		100	K.VDTTPNQGK.K
FALSE	[K].AAAGEAK.[V]	1xTMT6plex [K7]; 1xTMT6plex [N-Term]	0.00139174	1	1	2	Q9P2E9	Q9P2E9 [737-743]		0	1075.65	1.001	28.93		100	K.AAAGEAK.V
FALSE	[K].KAEGSPSEGK.[K]	2xTMT6plex [K1; K10]; 1xTMT6plex [N-Term]	0.00139174	1	1	2	Q9P2E9	Q9P2E9 [569-578]		1	1676.98	0.758	21.52		100	K.KAEGSPSEGK.K
FALSE	[K].LTSDLGR.[A]	1xTMT6plex [N-Term]	0.00192392	1	1	2	Q9P2E9	Q9P2E9 [1359-1365]		0	990.578	0.915	19.35		100	K.LTSDLGR.A
FALSE	[K].QNAELAK.[L]	1xTMT6plex [K7]; 1xTMT6plex [N-Term]	0.00237856	1	1	2	Q9P2E9	Q9P2E9 [820-826]		0	1231.74	0.99	29.92		100	K.QNAELAK.L
FALSE	[R].QQLSEMK.[S]	1xTMT6plex [K7]; 1xTMT6plex [N-Term]	0.00237856	1	1	2	Q9P2E9	Q9P2E9 [1256-1262]		0	1321.75	0.993	31.04		100	R.QQLSEMK.S
FALSE	[K].KVEGAPTQGR.[K]	1xTMT6plex [K1]; 1xTMT6plex [N-Term]	0.00258338	1	1	3	Q9P2E9	Q9P2E9 [281-290]		1	1500.89	1.11	4.64		100	K.KVEGAPTQGR.K
FALSE	[R].EAVEQQK.[V]	1xTMT6plex [K7]; 1xTMT6plex [N-Term]	0.00573188	1	1	1	Q9P2E9	Q9P2E9 [1008-1014]		0	1289.75	1.044	15.97		100	R.EAVEQQK.V
FALSE	[K].VEGAPTQGR.[K]	1xTMT6plex [N-Term]	0.00687389	1	1	2	Q9P2E9	Q9P2E9 [282-290]		0	1143.63	1.053	11.49		100	K.VEGAPTQGR.K
FALSE	[K].AEGSPSEGKK.[A]	2xTMT6plex [K9; K10]; 1xTMT6plex [N-Term]	0.00687389	1	1	1	Q9P2E9	Q9P2E9 [570-579]		1	1676.98	0.836	44.88		100	K.AEGSPSEGKK.A
FALSE	[R].KAEGAQNQAK.[K]	2xTMT6plex [K1; K10]; 1xTMT6plex [N-Term]	0.00755645	1	1	1	Q9P2E9	Q9P2E9 [291-300]		1	1732.03	0.758	38.76		100	R.KAEGAQNQAK.K
FALSE	[K].VEGAQNQGKK.[A]	2xTMT6plex [K9; K10]; 1xTMT6plex [N-Term]	0.00813383	1	1	1	Q9P2E9	Q9P2E9 [302-311]; [392-401]; [472-481]		1	1746.05	0.926	24.12		100	K.VEGAQNQGKK.A; K.VEGAQNQGKK.A; K.VEGAQNQGKK.A
High	Q15149	Plectin OS=Homo sapiens OX=9606 GN=PLEC PE=1 SV=3	404.338	24	107	143	106	4684	531.5	5.96	424.33	107	5339	PLEC	12204	13882.2	10779.2	13817.2	15804.8	12193.5
Checked	Annotated Sequence	Modifications	Qvality q-value	# Protein Groups	# Proteins	# PSMs	Master Protein Accessions	Positions in Master Proteins	Modifications in Master Proteins	# Missed Cleavages	Theo. MH+ [Da]	Abundance Ratio: (HO) / (WT)	Abundances (Grouped) CV [%]: HO	Quan Info	Channel Occupancy [%]	Sequence in Protein
FALSE	[K].MQAVQEATR.[L]	1xTMT6plex [N-Term]	0.00030973	1	1	2	Q15149	Q15149 [2453-2461]		0	1262.67	0.865	28.9		100	K.MQAVQEATR.L
FALSE	[R].LSVAAQEAAR.[L]	1xTMT6plex [N-Term]	0.00030973	1	1	1	Q15149	Q15149 [2420-2429]		0	1244.72	0.794	28.32		100	R.LSVAAQEAAR.L
FALSE	[KR].LTVEEAVR.[MH]	1xTMT6plex [N-Term]	0.00030973	2	2	2	Q15149; Q9UPN3	Q15149 [4122-4129]; Q9UPN3 [1789-1796]		0	1145.67	0.843	18.2	Shared	100	K.LTVEEAVR.M
FALSE	[R].LVASMEEAR.[R]	1xTMT6plex [N-Term]	0.00030973	1	1	1	Q15149	Q15149 [2685-2693]		0	1234.67	0.895	22.79		100	R.LVASMEEAR.R
FALSE	[K].NLLDEELQR.[L]	1xTMT6plex [N-Term]	0.00030973	1	1	1	Q15149	Q15149 [2340-2348]		0	1358.75	0.85	19.33		100	K.NLLDEELQR.L
FALSE	[R].QLAEAHAQAK.[A]	1xTMT6plex [K10]; 1xTMT6plex [N-Term]	0.00030973	1	1	2	Q15149	Q15149 [1511-1520]		0	1524.89	0.799	23.83		100	R.QLAEAHAQAK.A
FALSE	[K].QEELQQLEQQR.[R]	1xTMT6plex [N-Term]	0.00030973	1	1	1	Q15149	Q15149 [2707-2717]		0	1657.87	0.713	28.54		100	K.QEELQQLEQQR.R
FALSE	[R].QEQALLEEIER.[H]	1xTMT6plex [N-Term]	0.00030973	1	1	1	Q15149	Q15149 [1387-1397]		0	1586.86	0.871	29.23		100	R.QEQALLEEIER.H
FALSE	[R].QLAEEDLAQQR.[A]	1xTMT6plex [N-Term]	0.00030973	1	1	1	Q15149	Q15149 [2432-2442]		0	1529.81	1.059	19.74		100	R.QLAEEDLAQQR.A
FALSE	[R].QLQLAQEAAQK.[R]	1xTMT6plex [K11]; 1xTMT6plex [N-Term]	0.00030973	1	1	1	Q15149	Q15149 [2172-2182]		0	1686	1.119	25.86		100	R.QLQLAQEAAQK.R
FALSE	[K].QITMEELVR.[S]	1xTMT6plex [N-Term]	0.00030973	1	1	1	Q15149	Q15149 [4028-4036]		0	1347.75	0.919	17.79		100	K.QITMEELVR.S
FALSE	[R].QLAEGTAQQR.[L]	1xTMT6plex [N-Term]	0.00030973	1	1	2	Q15149	Q15149 [1836-1845]		0	1330.73	0.874	19.67		100	R.QLAEGTAQQR.L
FALSE	[R].QLLEEELAR.[L]	1xTMT6plex [N-Term]	0.00030973	1	1	2	Q15149	Q15149 [1867-1875]		0	1329.76	0.756	38.15		100	R.QLLEEELAR.L
FALSE	[R].NLVDNITGQR.[L]	1xTMT6plex [N-Term]	0.00030973	1	1	2	Q15149	Q15149 [4438-4447]		0	1358.76	0.841	32.28		100	R.NLVDNITGQR.L
FALSE	[K].LEQLFQDEVAK.[A]	1xTMT6plex [K11]; 1xTMT6plex [N-Term]	0.00030973	1	1	2	Q15149	Q15149 [2653-2663]		0	1778.01	0.872	22.4		100	K.LEQLFQDEVAK.A
FALSE	[R].LEDLLQDAQDEK.[E]	1xTMT6plex [K12]; 1xTMT6plex [N-Term]	0.00030973	1	1	2	Q15149	Q15149 [897-908]		0	1875.01			No Quan Values		R.LEDLLQDAQDEK.E
FALSE	[K].LAAIGEATR.[L]	1xTMT6plex [N-Term]	0.00030973	1	1	1	Q15149	Q15149 [1976-1984]		0	1130.67	0.831	28.6		100	K.LAAIGEATR.L
FALSE	[R].IISLETYNLLR.[E]	1xTMT6plex [N-Term]	0.00030973	1	1	1	Q15149	Q15149 [3794-3804]		0	1563.93	0.886	6.21		100	R.IISLETYNLLR.E
FALSE	[R].LQLEACETR.[T]	1xCarbamidomethyl [C6]; 1xTMT6plex [N-Term]	0.00030973	1	1	1	Q15149	Q15149 [1131-1139]		0	1348.71	0.824	18.36		100	R.LQLEACETR.T
FALSE	[R].LQEAGILSAEELQR.[L]	1xTMT6plex [N-Term]	0.00030973	1	1	1	Q15149	Q15149 [2795-2808]		0	1785.99	0.848	22.04		100	R.LQEAGILSAEELQR.L
FALSE	[R].LLLEAQAATGFLLDPVK.[G]	1xTMT6plex [K17]; 1xTMT6plex [N-Term]	0.00030973	1	1	1	Q15149	Q15149 [3859-3875]		0	2257.36	1.268	63.26		100	R.LLLEAQAATGFLLDPVK.G
FALSE	[K].IIITVVEEQEQK.[G]	1xTMT6plex [K12]; 1xTMT6plex [N-Term]	0.00030973	1	1	1	Q15149	Q15149 [3095-3106]		0	1887.12	0.784	20.31		100	K.IIITVVEEQEQK.G
FALSE	[R].LLFNDVQTLK.[D]	1xTMT6plex [K10]; 1xTMT6plex [N-Term]	0.00030973	1	1	1	Q15149	Q15149 [588-597]		0	1649	0.834	25.34		100	R.LLFNDVQTLK.D
FALSE	[R].LLDAQLATGGIVDPR.[L]	1xTMT6plex [N-Term]	0.00030973	1	1	2	Q15149	Q15149 [3936-3950]		0	1768.02	0.788	32.04		100	R.LLDAQLATGGIVDPR.L
FALSE	[R].LLDPEDVDVPQPDEK.[S]	1xTMT6plex [K15]; 1xTMT6plex [N-Term]	0.00030973	1	1	3	Q15149	Q15149 [372-386]		0	2167.15	0.948	24.78		100	R.LLDPEDVDVPQPDEK.S
FALSE	[R].LLEAAAQSTK.[G]	1xTMT6plex [K10]; 1xTMT6plex [N-Term]	0.00030973	1	1	1	Q15149	Q15149 [4600-4609]		0	1489.9	0.825	21.26		100	R.LLEAAAQSTK.G
FALSE	[R].LLEAQACTGGIIDPSTGER.[F]	1xCarbamidomethyl [C7]; 1xTMT6plex [N-Term]	0.00030973	1	1	1	Q15149	Q15149 [4448-4466]		0	2217.14	1.059	27.2		100	R.LLEAQACTGGIIDPSTGER.F
FALSE	[R].LLEAQIATGGIIDPEESHR.[L]	1xTMT6plex [N-Term]	0.00030973	1	1	1	Q15149	Q15149 [4179-4197]		0	2278.22	0.996	7.43		100	R.LLEAQIATGGIIDPEESHR.L
FALSE	[K].TPVEVPVGGFK.[G]	1xTMT6plex [K11]; 1xTMT6plex [N-Term]	0.00030973	1	1	2	Q15149	Q15149 [3374-3384]		0	1587.95	1.002	19.05		100	K.TPVEVPVGGFK.G
FALSE	[R].VVIVDPETGK.[E]	1xTMT6plex [K10]; 1xTMT6plex [N-Term]	0.00030973	1	1	1	Q15149	Q15149 [4278-4287]		0	1514.92	0.783	35.15		100	R.VVIVDPETGK.E
FALSE	[K].VLALPEPSPAAPTLR.[S]	1xTMT6plex [N-Term]	0.00030973	1	1	2	Q15149	Q15149 [1187-1201]		0	1761.05	0.928	16.07		100	K.VLALPEPSPAAPTLR.S
FALSE	[R].VLADPSDDTK.[G]	1xTMT6plex [K10]; 1xTMT6plex [N-Term]	0.00030973	1	2	1	Q15149	Q15149 [2979-2988]; [3638-3647]		0	1518.84	0.828	21.02		100	R.VLADPSDDTK.G; R.VLADPSDDTK.G
FALSE	[R].VPDVQDGVR.[A]	1xTMT6plex [N-Term]	0.00030973	1	1	1	Q15149	Q15149 [402-410]		0	1213.67	0.91	21.35		100	R.VPDVQDGVR.A
FALSE	[R].VPLDEALQR.[G]	1xTMT6plex [N-Term]	0.00030973	1	1	1	Q15149	Q15149 [4543-4551]		0	1269.74	1.008	34.28		100	R.VPLDEALQR.G
FALSE	[R].VQMEELSK.[L]	1xTMT6plex [K8]; 1xTMT6plex [N-Term]	0.00030973	1	1	2	Q15149	Q15149 [2372-2379]		0	1421.81	0.873	32.57		100	R.VQMEELSK.L
FALSE	[R].SELELTLGK.[L]	1xTMT6plex [K9]; 1xTMT6plex [N-Term]	0.00030973	1	1	1	Q15149	Q15149 [1202-1210]		0	1447.88	0.736	28.01		100	R.SELELTLGK.L
FALSE	[K].RQELEAELAK.[V]	1xTMT6plex [K10]; 1xTMT6plex [N-Term]	0.00030973	1	1	3	Q15149	Q15149 [1887-1896]		1	1644.97	0.993	5.21		100	K.RQELEAELAK.V
FALSE	[R].SAEAELQSK.[R]	1xTMT6plex [K9]; 1xTMT6plex [N-Term]	0.00030973	1	1	2	Q15149	Q15149 [1710-1718]		0	1420.8	0.841	37.57		100	R.SAEAELQSK.R
FALSE	[R].SLQEEHVAVAQLR.[E]	1xTMT6plex [N-Term]	0.00030973	1	1	1	Q15149	Q15149 [1732-1744]		0	1708.95	0.886	4.24		100	R.SLQEEHVAVAQLR.E
FALSE	[R].SIQEELQQLR.[Q]	1xTMT6plex [N-Term]	0.00030973	1	1	1	Q15149	Q15149 [1554-1563]		0	1472.83	0.912	8.34		100	R.SIQEELQQLR.Q
FALSE	[R].RPELEDSTLR.[Y]	1xTMT6plex [N-Term]	0.00030973	1	1	2	Q15149	Q15149 [651-660]		0	1444.8	1.01	6.19		100	R.RPELEDSTLR.Y
FALSE	[R].QSSEAEIQAK.[A]	1xTMT6plex [K10]; 1xTMT6plex [N-Term]	0.00030973	1	1	1	Q15149	Q15149 [1564-1573]		0	1548.86	0.729	4.07		100	R.QSSEAEIQAK.A
FALSE	[R].QTNLENLDQAFSVAER.[D]	1xTMT6plex [N-Term]	0.00030973	1	1	1	Q15149	Q15149 [350-365]		0	2064.06	0.802	15.47		100	R.QTNLENLDQAFSVAER.D
FALSE	[R].QQGLASYDYVR.[R]	1xTMT6plex [N-Term]	0.00030973	1	1	2	Q15149	Q15149 [3771-3781]		0	1528.8	0.81	28.22		100	R.QQGLASYDYVR.R
FALSE	[R].REEAAVDAQQQK.[R]	1xTMT6plex [K12]; 1xTMT6plex [N-Term]	0.00030973	1	1	1	Q15149	Q15149 [1541-1552]		1	1831.01	0.894	4.24		100	R.REEAAVDAQQQK.R
FALSE	[R].QVEEEILALK.[A]	1xTMT6plex [K10]; 1xTMT6plex [N-Term]	0.00030973	1	1	1	Q15149	Q15149 [2059-2068]		0	1629.98			No Quan Values		R.QVEEEILALK.A
FALSE	[R].QVQVALETAQR.[S]	1xTMT6plex [N-Term]	0.00030973	1	1	1	Q15149	Q15149 [1699-1709]		0	1471.84	0.965	11.22		100	R.QVQVALETAQR.S
FALSE	[R].SLSAIYLEK.[L]	1xTMT6plex [K9]; 1xTMT6plex [N-Term]	0.00030973	1	1	1	Q15149	Q15149 [1216-1224]		0	1481.9	0.973	3.34		100	R.SLSAIYLEK.L
FALSE	[K].TEAEIALK.[E]	1xTMT6plex [K8]; 1xTMT6plex [N-Term]	0.00030973	1	1	1	Q15149	Q15149 [1987-1994]		0	1332.81	0.768	22.23		100	K.TEAEIALK.E
FALSE	[R].TELATQEK.[V]	1xTMT6plex [K8]; 1xTMT6plex [N-Term]	0.00030973	1	1	1	Q15149	Q15149 [2557-2564]		0	1377.8	1.053	21.24		100	R.TELATQEK.V
FALSE	[R].SMVEEGTGLR.[L]	1xTMT6plex [N-Term]	0.00030973	1	1	1	Q15149	Q15149 [4590-4599]		0	1307.68	0.903	13.48		100	R.SMVEEGTGLR.L
FALSE	[R].SLVPAAELLESR.[V]	1xTMT6plex [N-Term]	0.00030973	1	1	1	Q15149	Q15149 [3116-3127]		0	1513.88	0.759	25.58		100	R.SLVPAAELLESR.V
FALSE	[R].SQVEEELFSVR.[V]	1xTMT6plex [N-Term]	0.00030973	1	1	2	Q15149	Q15149 [2361-2371]		0	1551.82	0.966	30.3		100	R.SQVEEELFSVR.V
FALSE	[R].SQVMDEATALQLR.[E]	1xTMT6plex [N-Term]	0.00030973	1	1	1	Q15149	Q15149 [4037-4049]		0	1690.9	0.968	9.6		100	R.SQVMDEATALQLR.E
FALSE	[R].ALQALEELR.[L]	1xTMT6plex [N-Term]	0.00030973	1	1	2	Q15149	Q15149 [1671-1679]		0	1271.75	0.832	22.99		100	R.ALQALEELR.L
FALSE	[R].EAAAATQK.[R]	1xTMT6plex [K8]; 1xTMT6plex [N-Term]	0.00030973	1	1	1	Q15149	Q15149 [1879-1886]		0	1247.74	0.744	26.52		100	R.EAAAATQK.R
FALSE	[K].AGVVGPELHEQLLSAEK.[A]	1xTMT6plex [K17]; 1xTMT6plex [N-Term]	0.00030973	1	1	1	Q15149	Q15149 [3552-3568]		0	2235.27	0.817	23.45		100	K.AGVVGPELHEQLLSAEK.A
FALSE	[R].FPVTDAVNK.[G]	1xTMT6plex [K9]; 1xTMT6plex [N-Term]	0.00030973	1	1	1	Q15149	Q15149 [4467-4475]		0	1448.85	0.778	26.84		100	R.FPVTDAVNK.G
FALSE	[K].AGVAAPATQVAQVTLQSVQR.[R]	1xTMT6plex [N-Term]	0.00030973	1	1	1	Q15149	Q15149 [631-650]		0	2224.26	0.917	16.28		100	K.AGVAAPATQVAQVTLQSVQR.R
FALSE	[K].ATVSAPFGK.[F]	1xTMT6plex [K9]; 1xTMT6plex [N-Term]	0.00030973	1	1	1	Q15149	Q15149 [3045-3053]		0	1335.8	0.784	27.6		100	K.ATVSAPFGK.F
FALSE	[R].APVPASELLASGVLSR.[A]	1xTMT6plex [N-Term]	0.00030973	1	1	2	Q15149	Q15149 [3447-3462]		0	1796.05	1.06	3.88		100	R.APVPASELLASGVLSR.A
FALSE	[R].AQAEQAALR.[Q]	1xTMT6plex [N-Term]	0.00030973	1	1	2	Q15149	Q15149 [2287-2295]		0	1186.67	0.781	31.46		100	R.AQAEQAALR.Q
FALSE	[R].AQAEAQQPTFDALRDELR.[G]	1xTMT6plex [N-Term]	0.00030973	1	1	4	Q15149	Q15149 [1274-1291]		1	2288.18	0.836	23.5		100	R.AQAEAQQPTFDALRDELR.G
FALSE	[R].EGLTSIEEVTK.[N]	1xTMT6plex [K11]; 1xTMT6plex [N-Term]	0.00030973	1	1	1	Q15149	Q15149 [4050-4060]		0	1663.95	0.842	20.27		100	R.EGLTSIEEVTK.N
FALSE	[K].ELAQEQAR.[R]	1xTMT6plex [N-Term]	0.00030973	1	1	1	Q15149	Q15149 [2474-2481]		0	1173.64	1.142	14.62		100	K.ELAQEQAR.R
FALSE	[R].ELAEQELEK.[Q]	1xTMT6plex [K9]; 1xTMT6plex [N-Term]	0.00030973	1	1	1	Q15149	Q15149 [1825-1833]		0	1546.87	0.8	28.51		100	R.ELAEQELEK.Q
FALSE	[R].EQLQLLEEQHR.[A]	1xTMT6plex [N-Term]	0.00030973	1	1	1	Q15149	Q15149 [2733-2743]		0	1651.9	1.385	40.2		100	R.EQLQLLEEQHR.A
FALSE	[R].EAIAELER.[E]	1xTMT6plex [N-Term]	0.00030973	1	1	1	Q15149	Q15149 [2587-2594]		0	1159.65	0.915	9.12		100	R.EAIAELER.E
FALSE	[K].GLLSAEVAR.[L]	1xTMT6plex [N-Term]	0.00030973	1	1	1	Q15149	Q15149 [3850-3858]		0	1144.69	0.757	29.21		100	K.GLLSAEVAR.L
FALSE	[R].GLFDEEMNEILTDPSDDTK.[G]	1xTMT6plex [K19]; 1xTMT6plex [N-Term]	0.00030973	1	1	1	Q15149	Q15149 [4207-4225]		0	2627.28	0.598	5.86		100	R.GLFDEEMNEILTDPSDDTK.G
FALSE	[K].AEAELLQQQK.[E]	1xTMT6plex [K10]; 1xTMT6plex [N-Term]	0.00030973	1	1	2	Q15149	Q15149 [2464-2473]		0	1615.94	0.857	12.04		100	K.AEAELLQQQK.E
FALSE	[R].GTQGAEEVLR.[A]	1xTMT6plex [N-Term]	0.00030973	1	1	1	Q15149	Q15149 [1234-1243]		0	1288.71	0.796	21.71		100	R.GTQGAEEVLR.A
FALSE	[R].DDGTGQLLLPLSDAR.[K]	1xTMT6plex [N-Term]	0.00030973	1	1	1	Q15149	Q15149 [4004-4018]		0	1799.97	0.839	13.43		100	R.DDGTGQLLLPLSDAR.K
FALSE	[K].DLSELGSVR.[T]	1xTMT6plex [N-Term]	0.00030973	1	1	1	Q15149	Q15149 [3477-3485]		0	1204.67	0.794	12.72		100	K.DLSELGSVR.T
FALSE	[K].AYSDPSTGEPATYGELQQR.[C]	1xTMT6plex [N-Term]	0.00030973	1	1	2	Q15149	Q15149 [3317-3335]		0	2299.1	1.033	9.03		100	K.AYSDPSTGEPATYGELQQR.C
FALSE	[R].GGAEGELQALR.[A]	1xTMT6plex [N-Term]	0.00030973	1	1	2	Q15149	Q15149 [1606-1616]		0	1329.73	0.982	1.08		100	R.GGAEGELQALR.A
FALSE	[R].SDEGQLSPATR.[G]	1xTMT6plex [N-Term]	0.000568404	1	1	2	Q15149	Q15149 [714-724]		0	1389.72	0.73	22.09		100	R.SDEGQLSPATR.G
FALSE	[R].DVAEVDTVRR.[A]	1xTMT6plex [N-Term]	0.000568404	1	1	1	Q15149	Q15149 [3146-3155]		1	1388.77	0.999	11.16		100	R.DVAEVDTVRR.A
FALSE	[K].QYINAIK.[D]	1xTMT6plex [K7]; 1xTMT6plex [N-Term]	0.000568404	1	1	1	Q15149	Q15149 [1411-1417]		0	1307.81	0.825	16.01		100	K.QYINAIK.D
FALSE	[R].AGLVGPEFHEK.[L]	1xTMT6plex [K11]; 1xTMT6plex [N-Term]	0.000568404	1	1	1	Q15149	Q15149 [3221-3231]		0	1641.94	0.992	18.69		100	R.AGLVGPEFHEK.L
FALSE	[R].AGTLSITEFADMLSGNAGGFR.[S]	1xTMT6plex [N-Term]	0.000568404	1	1	1	Q15149	Q15149 [4361-4381]		0	2344.18	1.016	35.81		100	R.AGTLSITEFADMLSGNAGGFR.S
FALSE	[R].LQAEEVAQQK.[S]	1xTMT6plex [K10]; 1xTMT6plex [N-Term]	0.000568404	1	1	1	Q15149	Q15149 [1783-1792]		0	1601.93	0.94	3.97		100	R.LQAEEVAQQK.S
FALSE	[R].LQLEATER.[Q]	1xTMT6plex [N-Term]	0.000568404	1	1	1	Q15149	Q15149 [1596-1603]		0	1188.68	0.943	22.53		100	R.LQLEATER.Q
FALSE	[R].LAEVEAALEK.[Q]	1xTMT6plex [K10]; 1xTMT6plex [N-Term]	0.000568404	1	1	1	Q15149	Q15149 [1499-1508]		0	1530.91	0.974	10.04		100	R.LAEVEAALEK.Q
FALSE	[K].GLVGPELHDR.[L]	1xTMT6plex [N-Term]	0.000568404	1	1	1	Q15149	Q15149 [3888-3897]		0	1321.74			No Quan Values		K.GLVGPELHDR.L
FALSE	[K].EQLNEYK.[G]	1xTMT6plex [K7]; 1xTMT6plex [N-Term]	0.000568404	1	1	1	Q15149	Q15149 [909-915]		0	1381.77	0.691	14.95		100	K.EQLNEYK.G
FALSE	[R].ELAEEAAR.[L]	1xTMT6plex [N-Term]	0.000568404	1	1	1	Q15149	Q15149 [1935-1942]		0	1117.61	1.017	6.77		100	R.ELAEEAAR.L
FALSE	[R].CVEDPETGLR.[L]	1xCarbamidomethyl [C1]; 1xTMT6plex [N-Term]	0.000568404	1	1	1	Q15149	Q15149 [3667-3676]		0	1404.7	0.972	21.89		100	R.CVEDPETGLR.L
FALSE	[K].ELIPTEEALR.[L]	1xTMT6plex [N-Term]	0.000568404	1	1	4	Q15149	Q15149 [3926-3935]		0	1399.8	1.217	11.41		100	K.ELIPTEEALR.L
FALSE	[K].RGPLPTEEQR.[V]	1xTMT6plex [N-Term]	0.00115152	1	1	1	Q15149	Q15149 [129-138]		1	1411.79			No Quan Values		K.RGPLPTEEQR.V
FALSE	[R].LPVEVAYK.[R]	1xTMT6plex [K8]; 1xTMT6plex [N-Term]	0.00115152	1	1	1	Q15149	Q15149 [4198-4205]		0	1376.86			No Quan Values		R.LPVEVAYK.R
FALSE	[R].NTNMTAK.[K]	1xTMT6plex [K7]; 1xTMT6plex [N-Term]	0.00139174	1	1	2	Q15149	Q15149 [785-791]		0	1237.7	0.847	19.39		100	R.NTNMTAK.K
FALSE	[K].EMELPAK.[E]	1xTMT6plex [K7]; 1xTMT6plex [N-Term]	0.00139174	1	1	1	Q15149	Q15149 [463-469]		0	1275.74	0.901	20.86		100	K.EMELPAK.E
FALSE	[R].VPLDVACAR.[G]	1xCarbamidomethyl [C7]; 1xTMT6plex [N-Term]	0.00139174	1	1	1	Q15149	Q15149 [3289-3297]		0	1229.69	0.798	18.33		100	R.VPLDVACAR.G
FALSE	[R].LDLQYAK.[L]	1xTMT6plex [K7]; 1xTMT6plex [N-Term]	0.00237856	1	1	1	Q15149	Q15149 [734-740]		0	1308.79	0.82	27.52		100	R.LDLQYAK.L
FALSE	[R].LVASMEEAR.[R]	1xOxidation [M5]; 1xTMT6plex [N-Term]	0.00237856	1	1	1	Q15149	Q15149 [2685-2693]		0	1250.66	0.877	12.9		100	R.LVASMEEAR.R
FALSE	[R].DVGAYSK.[Y]	1xTMT6plex [K7]; 1xTMT6plex [N-Term]	0.00237856	1	1	1	Q15149	Q15149 [4564-4570]		0	1197.69	0.855	21.51		100	R.DVGAYSK.Y
FALSE	[R].AHEEQLK.[E]	1xTMT6plex [K7]; 1xTMT6plex [N-Term]	0.00258338	1	1	2	Q15149	Q15149 [1244-1250]		0	1312.76	0.912	12.07		100	R.AHEEQLK.E
FALSE	[R].LFNAIIHR.[H]	1xTMT6plex [N-Term]	0.00428502	1	1	1	Q15149	Q15149 [329-336]		0	1212.74	0.845	33.21		100	R.LFNAIIHR.H
FALSE	[K].AQVEQELTTLR.[L]	1xTMT6plex [N-Term]	0.00550176	1	1	1	Q15149	Q15149 [2319-2329]		0	1516.85	0.985	22.33		100	K.AQVEQELTTLR.L
FALSE	[R].LSFSGLR.[A]	1xTMT6plex [N-Term]	0.00573188	1	1	1	Q15149	Q15149 [3440-3446]		0	1008.6	0.868	17.41		100	R.LSFSGLR.A
FALSE	[K].AFCGFEDPR.[T]	1xCarbamidomethyl [C3]; 1xTMT6plex [N-Term]	0.00596922	1	1	1	Q15149	Q15149 [4492-4500]		0	1327.63	0.961	7.91		100	K.AFCGFEDPR.T
FALSE	[R].ANELQLR.[W]	1xTMT6plex [N-Term]	0.00616547	1	1	1	Q15149	Q15149 [411-417]		0	1072.63	0.86	13.83		100	R.ANELQLR.W
FALSE	[K].LLLWSQR.[M]	1xTMT6plex [N-Term]	0.00639451	1	1	1	Q15149	Q15149 [301-307]		0	1144.7	0.868	20.25		100	K.LLLWSQR.M
FALSE	[R].ALAEEAK.[R]	1xTMT6plex [K7]; 1xTMT6plex [N-Term]	0.00755645	1	1	1	Q15149	Q15149 [1945-1951]		0	1189.72	0.846	13.54		100	R.ALAEEAK.R
FALSE	[K].FISETLR.[R]	1xTMT6plex [N-Term]	0.00797596	1	1	1	Q15149	Q15149 [1473-1479]		0	1094.64	0.887	7.96		100	K.FISETLR.R
FALSE	[R].QLAEEDAAR.[Q]	1xTMT6plex [N-Term]	0.00813383	1	1	1	Q15149	Q15149 [1955-1963]		0	1231.65	0.998	0.12		100	R.QLAEEDAAR.Q
FALSE	[R].LQLEETDHQK.[N]	1xTMT6plex [K10]; 1xTMT6plex [N-Term]	0.00903197	1	1	1	Q15149	Q15149 [2330-2339]		0	1698.94	0.799	28.96		100	R.LQLEETDHQK.N
High	Q13813	Spectrin alpha chain, non-erythrocytic 1 OS=Homo sapiens OX=9606 GN=SPTAN1 PE=1 SV=3	382.067	38	85	138	85	2472	284.4	5.35	428.33	85	6709	SPTAN1	13987.4	16588.7	11709.3	16708.6	19566.4	14064.2
Checked	Annotated Sequence	Modifications	Qvality q-value	# Protein Groups	# Proteins	# PSMs	Master Protein Accessions	Positions in Master Proteins	Modifications in Master Proteins	# Missed Cleavages	Theo. MH+ [Da]	Abundance Ratio: (HO) / (WT)	Abundances (Grouped) CV [%]: HO	Quan Info	Channel Occupancy [%]	Sequence in Protein
FALSE	[R].MNEVISLWK.[K]	1xTMT6plex [K9]; 1xTMT6plex [N-Term]	0.00030973	1	1	1	Q13813	Q13813 [653-661]		0	1577.91	0.849	31.86		100	R.MNEVISLWK.K
FALSE	[R].MQHNLEQQIQAR.[N]	1xTMT6plex [N-Term]	0.00030973	1	1	1	Q13813	Q13813 [2304-2315]		0	1724.91	0.983	22.88		100	R.MQHNLEQQIQAR.N
FALSE	[K].ITALDEFATK.[L]	1xTMT6plex [K10]; 1xTMT6plex [N-Term]	0.00030973	1	1	1	Q13813	Q13813 [523-532]		0	1566.91	0.759	38.03		100	K.ITALDEFATK.L
FALSE	[K].LQTASDESYK.[D]	1xTMT6plex [K10]; 1xTMT6plex [N-Term]	0.00030973	1	1	2	Q13813	Q13813 [1571-1580]		0	1599.86	0.758	36.13		100	K.LQTASDESYK.D
FALSE	[K].LSDDNTIGK.[E]	1xTMT6plex [K9]; 1xTMT6plex [N-Term]	0.00030973	1	1	2	Q13813	Q13813 [1830-1838]		0	1420.8	0.863	25.78		100	K.LSDDNTIGK.E
FALSE	[R].QGFVPAAYVK.[K]	1xTMT6plex [K10]; 1xTMT6plex [N-Term]	0.00030973	1	1	1	Q13813	Q13813 [1013-1022]		0	1537.91	0.774	40.09		100	R.QGFVPAAYVK.K
FALSE	[K].QEAFLLNEDLGDSLDSVEALLK.[K]	1xTMT6plex [K22]; 1xTMT6plex [N-Term]	0.00030973	1	1	1	Q13813	Q13813 [486-507]		0	2877.55	0.842	23.44		100	K.QEAFLLNEDLGDSLDSVEALLK.K
FALSE	[K].QETFDAGLQAFQQEGIANITALK.[D]	1xTMT6plex [K23]; 1xTMT6plex [N-Term]	0.00030973	1	1	1	Q13813	Q13813 [2018-2040]		0	2951.59	1.897	72.37		100	K.QETFDAGLQAFQQEGIANITALK.D
FALSE	[R].QEQIDNQTR.[I]	1xTMT6plex [N-Term]	0.00030973	1	1	1	Q13813	Q13813 [1046-1054]		0	1360.7	0.923	25.07		100	R.QEQIDNQTR.I
FALSE	[K].QDEVNAAWQR.[L]	1xTMT6plex [N-Term]	0.00030973	1	1	2	Q13813	Q13813 [230-239]		0	1445.73	0.774	26.9		100	K.QDEVNAAWQR.L
FALSE	[K].NQALNTDNYGHDLASVQALQR.[K]	1xTMT6plex [N-Term]	0.00030973	1	1	1	Q13813	Q13813 [1253-1273]		0	2557.3	1.123	18.07		100	K.NQALNTDNYGHDLASVQALQR.K
FALSE	[R].NTTGVTEEALK.[E]	1xTMT6plex [K11]; 1xTMT6plex [N-Term]	0.00030973	1	1	2	Q13813	Q13813 [2316-2326]		0	1620.92	0.814	40.42		100	R.NTTGVTEEALK.E
FALSE	[K].LDENSAFLQFNWK.[A]	1xTMT6plex [K13]; 1xTMT6plex [N-Term]	0.00030973	1	1	1	Q13813	Q13813 [1972-1984]		0	2070.11	0.87	15.45		100	K.LDENSAFLQFNWK.A
FALSE	[R].IDGITIQAR.[Q]	1xTMT6plex [N-Term]	0.00030973	1	1	1	Q13813	Q13813 [734-742]		0	1215.73	1.249	34.74		100	R.IDGITIQAR.Q
FALSE	[K].KFEEFQTDMAAHEER.[V]	1xTMT6plex [K1]; 1xTMT6plex [N-Term]	0.00030973	1	1	1	Q13813	Q13813 [190-204]		1	2326.15	0.901	23.09		100	K.KFEEFQTDMAAHEER.V
FALSE	[K].KLDPAQSASR.[E]	1xTMT6plex [K1]; 1xTMT6plex [N-Term]	0.00030973	1	1	1	Q13813	Q13813 [1023-1032]		1	1530.9	0.79	23.16		100	K.KLDPAQSASR.E
FALSE	[R].KVEDLFLTFAK.[K]	2xTMT6plex [K1; K11]; 1xTMT6plex [N-Term]	0.00030973	1	1	1	Q13813	Q13813 [2088-2098]		1	1998.22			No Quan Values		R.KVEDLFLTFAK.K
FALSE	[K].LLVGSEDYGR.[D]	1xTMT6plex [N-Term]	0.00030973	1	1	1	Q13813	Q13813 [1785-1794]		0	1337.73	0.862	18.39		100	K.LLVGSEDYGR.D
FALSE	[K].LIQEQHPEEELIK.[T]	1xTMT6plex [K13]; 1xTMT6plex [N-Term]	0.00030973	1	1	3	Q13813	Q13813 [215-227]		0	2064.17	0.948	18.02		100	K.LIQEQHPEEELIK.T
FALSE	[K].LIQNNHYAMEDVATR.[R]	1xOxidation [M9]; 1xTMT6plex [N-Term]	0.00030973	1	1	2	Q13813	Q13813 [533-547]		0	2020.01	0.863	27.09		100	K.LIQNNHYAMEDVATR.R
FALSE	[K].LQIASDENYK.[D]	1xTMT6plex [K10]; 1xTMT6plex [N-Term]	0.00030973	1	1	1	Q13813	Q13813 [64-73]		0	1638.91	0.791	35.89		100	K.LQIASDENYK.D
FALSE	[K].LFGAAEVQR.[F]	1xTMT6plex [N-Term]	0.00030973	1	1	1	Q13813	Q13813 [251-259]		0	1219.7	0.771	31.74		100	K.LFGAAEVQR.F
FALSE	[K].LGESQTLQQFSR.[D]	1xTMT6plex [N-Term]	0.00030973	1	1	1	Q13813	Q13813 [1547-1558]		0	1622.87	0.797	33.68		100	K.LGESQTLQQFSR.D
FALSE	[K].LLEATELK.[G]	1xTMT6plex [K8]; 1xTMT6plex [N-Term]	0.00030973	1	1	2	Q13813	Q13813 [663-670]		0	1374.86	0.785	35.33		100	K.LLEATELK.G
FALSE	[R].WSQLLANSAAR.[K]	1xTMT6plex [N-Term]	0.00030973	1	1	1	Q13813	Q13813 [2065-2075]		0	1445.81	0.808	27.82		100	R.WSQLLANSAAR.K
FALSE	[K].VNSLGETAER.[L]	1xTMT6plex [N-Term]	0.00030973	1	1	3	Q13813	Q13813 [1289-1298]		0	1304.7	0.825	14.57		100	K.VNSLGETAER.L
FALSE	[R].VNEVNQFAAK.[L]	1xTMT6plex [K10]; 1xTMT6plex [N-Term]	0.00030973	1	1	3	Q13813	Q13813 [205-214]		0	1577.91	0.771	30.08		100	R.VNEVNQFAAK.L
FALSE	[R].SLQQLAEER.[S]	1xTMT6plex [N-Term]	0.00030973	1	1	3	Q13813	Q13813 [1217-1225]		0	1302.72	0.804	18.22		100	R.SLQQLAEER.S
FALSE	[R].QQVAPTDDETGK.[E]	1xTMT6plex [K12]; 1xTMT6plex [N-Term]	0.00030973	1	1	1	Q13813	Q13813 [958-969]		0	1746.93	0.786	26.15		100	R.QQVAPTDDETGK.E
FALSE	[K].QQNFNTGIK.[D]	1xTMT6plex [K9]; 1xTMT6plex [N-Term]	0.00030973	1	1	3	Q13813	Q13813 [1660-1668]		0	1507.86	0.887	44.36		100	K.QQNFNTGIK.D
FALSE	[K].REELITNWEQIR.[T]	1xTMT6plex [N-Term]	0.00030973	1	1	2	Q13813	Q13813 [336-347]		1	1815.99	0.907	24.46		100	K.REELITNWEQIR.T
FALSE	[R].QWELLLEK.[M]	1xTMT6plex [K8]; 1xTMT6plex [N-Term]	0.00030973	1	1	1	Q13813	Q13813 [130-137]		0	1516.91	0.829	33.87		100	R.QWELLLEK.M
FALSE	[K].TATDEAYK.[D]	1xTMT6plex [K8]; 1xTMT6plex [N-Term]	0.00030973	1	1	3	Q13813	Q13813 [595-602]		0	1356.74	0.832	38.84		100	K.TATDEAYK.D
FALSE	[K].SLSAQEEK.[I]	1xTMT6plex [K8]; 1xTMT6plex [N-Term]	0.00030973	1	1	3	Q13813	Q13813 [515-522]		0	1349.77	0.839	25.71		100	K.SLSAQEEK.I
FALSE	[K].DVTGAEALLER.[H]	1xTMT6plex [N-Term]	0.00030973	1	1	1	Q13813	Q13813 [1370-1380]		0	1402.77	0.784	26.26		100	K.DVTGAEALLER.H
FALSE	[R].DVDETISWIK.[E]	1xTMT6plex [K10]; 1xTMT6plex [N-Term]	0.00030973	1	1	2	Q13813	Q13813 [263-272]		0	1663.93	0.943	28.89		100	R.DVDETISWIK.E
FALSE	[K].EAALTSEEVGADLEQVEVLQK.[K]	1xTMT6plex [K21]; 1xTMT6plex [N-Term]	0.00030973	1	1	2	Q13813	Q13813 [1111-1131]		0	2716.47	0.884	26.17		100	K.EAALTSEEVGADLEQVEVLQK.K
FALSE	[K].ALINADELASDVAGAEALLDR.[H]	1xTMT6plex [N-Term]	0.00030973	1	1	3	Q13813	Q13813 [382-402]		0	2356.26	1.133	25.81		100	K.ALINADELASDVAGAEALLDR.H
FALSE	[K].AINVQEEK.[I]	1xTMT6plex [K8]; 1xTMT6plex [N-Term]	0.00030973	1	1	3	Q13813	Q13813 [1493-1500]		0	1388.81	0.794	32.09		100	K.AINVQEEK.I
FALSE	[K].EQLMASDDFGR.[D]	1xTMT6plex [N-Term]	0.00030973	1	1	1	Q13813	Q13813 [275-285]		0	1497.72	0.778	7.79		100	K.EQLMASDDFGR.D
FALSE	[R].EANQQQQFNR.[N]	1xTMT6plex [N-Term]	0.00030973	1	1	2	Q13813	Q13813 [676-685]		0	1491.75	0.708	23.31		100	R.EANQQQQFNR.N
FALSE	[R].EANELQQWINEK.[E]	1xTMT6plex [K12]; 1xTMT6plex [N-Term]	0.00030973	1	1	1	Q13813	Q13813 [1099-1110]		0	1960.05	0.959	21.55		100	R.EANELQQWINEK.E
FALSE	[K].EAIVTSEELGQDLEHVEVLQK.[K]	1xTMT6plex [K21]; 1xTMT6plex [N-Term]	0.00030973	1	1	4	Q13813	Q13813 [169-189]		0	2824.53	0.948	25.33		100	K.EAIVTSEELGQDLEHVEVLQK.K
FALSE	[K].EPIAASTNR.[G]	1xTMT6plex [N-Term]	0.00030973	1	1	4	Q13813	Q13813 [804-812]		0	1187.66	0.883	19.79		100	K.EPIAASTNR.G
FALSE	[R].ENLLEEQGSIALR.[Q]	1xTMT6plex [N-Term]	0.00030973	1	1	2	Q13813	Q13813 [1033-1045]		0	1700.94	0.962	11.89		100	R.ENLLEEQGSIALR.Q
FALSE	[R].GLVSSDELAK.[D]	1xTMT6plex [K10]; 1xTMT6plex [N-Term]	0.00030973	1	1	2	Q13813	Q13813 [1360-1369]		0	1476.87	0.778	35.38		100	R.GLVSSDELAK.D
FALSE	[K].DLASVNNLLK.[K]	1xTMT6plex [K10]; 1xTMT6plex [N-Term]	0.00030973	1	1	3	Q13813	Q13813 [1689-1698]		0	1544.94	0.845	27.8		100	K.DLASVNNLLK.K
FALSE	[R].DLASVQALLR.[K]	1xTMT6plex [N-Term]	0.00030973	1	1	1	Q13813	Q13813 [286-295]		0	1314.79	0.828	27.22		100	R.DLASVQALLR.K
FALSE	[R].CNSLEEIK.[A]	1xCarbamidomethyl [C1]; 1xTMT6plex [K8]; 1xTMT6plex [N-Term]	0.00030973	1	1	1	Q13813	Q13813 [2120-2127]		0	1450.8	0.712	42.24		100	R.CNSLEEIK.A
FALSE	[R].DLAALEDK.[V]	1xTMT6plex [K8]; 1xTMT6plex [N-Term]	0.00030973	1	1	4	Q13813	Q13813 [303-310]		0	1332.78	0.781	24		100	R.DLAALEDK.V
FALSE	[R].GVIDMGNSLIER.[G]	1xTMT6plex [N-Term]	0.00030973	1	1	1	Q13813	Q13813 [1608-1619]		0	1532.83	0.804	38.35		100	R.GVIDMGNSLIER.G
FALSE	[K].DEDSAEALLK.[K]	1xTMT6plex [K10]; 1xTMT6plex [N-Term]	0.00030973	1	1	1	Q13813	Q13813 [921-930]		0	1548.85	0.699	29.3		100	K.DEDSAEALLK.K
FALSE	[R].DCEQAENWMAAR.[E]	1xCarbamidomethyl [C2]; 1xTMT6plex [N-Term]	0.00030973	1	1	1	Q13813	Q13813 [1453-1464]		0	1709.76	0.835	31.15		100	R.DCEQAENWMAAR.E
FALSE	[R].DLTGVQNLR.[K]	1xTMT6plex [N-Term]	0.00030973	1	1	3	Q13813	Q13813 [1795-1803]		0	1244.72	0.851	35.45		100	R.DLTGVQNLR.K
FALSE	[K].DLTNVQNLQK.[K]	1xTMT6plex [K10]; 1xTMT6plex [N-Term]	0.00030973	1	1	3	Q13813	Q13813 [709-718]		0	1630.95	0.834	40.98		100	K.DLTNVQNLQK.K
FALSE	[K].DPSNLQGK.[V]	1xTMT6plex [K8]; 1xTMT6plex [N-Term]	0.00030973	1	1	1	Q13813	Q13813 [603-610]		0	1316.76	0.793	33.86		100	K.DPSNLQGK.V
FALSE	[LK].GDSLDSVEALIK.[K]	1xTMT6plex [K12]; 1xTMT6plex [N-Term]	0.00030973	1	1	1	Q13813	Q13813 [496-507]; [1474-1485]		0	1704.98	0.901	22.95		100	L.GDSLDSVEALLK.K; K.GDSLDSVEALIK.K
FALSE	[R].DLSSVQTLLTK.[Q]	1xTMT6plex [K11]; 1xTMT6plex [N-Term]	0.00030973	1	1	2	Q13813	Q13813 [2007-2017]		0	1663	1.021	2.62		100	R.DLSSVQTLLTK.Q
FALSE	[R].DLTSWVTEMK.[A]	1xTMT6plex [K10]; 1xTMT6plex [N-Term]	0.00030973	1	1	1	Q13813	Q13813 [372-381]		0	1667.91	0.909	27.04		100	R.DLTSWVTEMK.A
FALSE	[R].GACAGSEDAVK.[A]	1xCarbamidomethyl [C3]; 1xTMT6plex [K11]; 1xTMT6plex [N-Term]	0.00030973	1	1	2	Q13813	Q13813 [1620-1630]		0	1522.79	0.783	38.6		100	R.GACAGSEDAVK.A
FALSE	[K].DLIGVQNLLK.[K]	1xTMT6plex [K10]; 1xTMT6plex [N-Term]	0.00030973	1	1	1	Q13813	Q13813 [815-824]		0	1570.99	0.871	16.11		100	K.DLIGVQNLLK.K
FALSE	[K].DPTNLQGK.[L]	1xTMT6plex [K8]; 1xTMT6plex [N-Term]	0.00030973	1	1	1	Q13813	Q13813 [74-81]		0	1330.77	0.815	25.04		100	K.DPTNLQGK.L
FALSE	[K].GEIDAHEDSFK.[S]	1xTMT6plex [K11]; 1xTMT6plex [N-Term]	0.00030973	1	1	2	Q13813	Q13813 [408-418]		0	1705.88	0.831	22.37		100	K.GEIDAHEDSFK.S
FALSE	[K].DLNSQADSLMTSSAFDTSQVK.[D]	1xOxidation [M10]; 1xTMT6plex [K21]; 1xTMT6plex [N-Term]	0.00030973	1	1	1	Q13813	Q13813 [1716-1736]		0	2719.35	1.023	23.48		100	K.DLNSQADSLMTSSAFDTSQVK.D
FALSE	[K].DPTNIQSK.[H]	1xTMT6plex [K8]; 1xTMT6plex [N-Term]	0.00030973	1	1	1	Q13813	Q13813 [1581-1588]		0	1360.78	0.734	21.23		100	K.DPTNIQSK.H
FALSE	[K].CTELNQAWSSLGK.[R]	1xCarbamidomethyl [C1]; 1xTMT6plex [K13]; 1xTMT6plex [N-Term]	0.000568404	1	1	1	Q13813	Q13813 [1314-1326]		0	1952.03	0.921	4.34		100	K.CTELNQAWSSLGK.R
FALSE	[R].DLAALGDK.[V]	1xTMT6plex [K8]; 1xTMT6plex [N-Term]	0.000568404	1	1	1	Q13813	Q13813 [1281-1288]		0	1260.76	0.862	33.83		100	R.DLAALGDK.V
FALSE	[K].GDILTLLNSTNK.[D]	1xTMT6plex [K12]; 1xTMT6plex [N-Term]	0.000568404	1	1	2	Q13813	Q13813 [991-1002]		0	1747.04	0.711	3.08		100	K.GDILTLLNSTNK.D
FALSE	[K].LTVLSEER.[A]	1xTMT6plex [N-Term]	0.000568404	1	1	1	Q13813	Q13813 [442-449]		0	1175.68	0.823	28.13		100	K.LTVLSEER.A
FALSE	[K].GNAMVEEGHFAAEDVK.[A]	1xOxidation [M4]; 1xTMT6plex [K16]; 1xTMT6plex [N-Term]	0.000568404	1	1	1	Q13813	Q13813 [847-862]		0	2178.09			No Quan Values		K.GNAMVEEGHFAAEDVK.A
FALSE	[K].KFDDFQK.[D]	2xTMT6plex [K1; K7]; 1xTMT6plex [N-Term]	0.000568404	1	1	1	Q13813	Q13813 [1132-1138]		1	1614.95	0.775	33.89		100	K.KFDDFQK.D
FALSE	[K].LGDSHDLQR.[F]	1xTMT6plex [N-Term]	0.000568404	1	1	2	Q13813	Q13813 [1335-1343]		0	1269.67	1.054	8.37		100	K.LGDSHDLQR.F
FALSE	[K].LHELNQK.[W]	1xTMT6plex [K7]; 1xTMT6plex [N-Term]	0.000568404	1	1	1	Q13813	Q13813 [865-871]		0	1339.81	0.825	4.71		100	K.LHELNQK.W
FALSE	[K].LDILDQER.[A]	1xTMT6plex [N-Term]	0.000568404	1	1	3	Q13813	Q13813 [1420-1427]		0	1230.69	0.823	26.66		100	K.LDILDQER.A
FALSE	[K].ADVVESWIGEK.[E]	1xTMT6plex [K11]; 1xTMT6plex [N-Term]	0.000568404	1	1	1	Q13813	Q13813 [1985-1995]		0	1690.94	0.929	18.46		100	K.ADVVESWIGEK.E
FALSE	[K].EPIVGSTDYGK.[D]	1xTMT6plex [K11]; 1xTMT6plex [N-Term]	0.000568404	1	1	1	Q13813	Q13813 [910-920]		0	1623.9	0.779	31.09		100	K.EPIVGSTDYGK.D
FALSE	[R].MQHNLEQQIQAR.[N]	1xOxidation [M1]; 1xTMT6plex [N-Term]	0.000568404	1	1	1	Q13813	Q13813 [2304-2315]		0	1740.9	0.96	14.37		100	R.MQHNLEQQIQAR.N
FALSE	[K].DQLLAAK.[H]	1xTMT6plex [K7]; 1xTMT6plex [N-Term]	0.00139174	1	1	1	Q13813	Q13813 [2041-2047]		0	1216.77	0.783	30.73		100	K.DQLLAAK.H
FALSE	[R].EAFLNTEDK.[G]	1xTMT6plex [K9]; 1xTMT6plex [N-Term]	0.00139174	1	1	1	Q13813	Q13813 [1465-1473]		0	1524.83	0.959	43.41		100	R.EAFLNTEDK.G
FALSE	[K].LIDVNHYAK.[D]	1xTMT6plex [K9]; 1xTMT6plex [N-Term]	0.00139174	1	1	1	Q13813	Q13813 [638-646]		0	1530.9	0.799	13.48		100	K.LIDVNHYAK.D
FALSE	[K].EELYQNLTR.[E]	1xTMT6plex [N-Term]	0.00218929	1	1	1	Q13813	Q13813 [2427-2435]		0	1394.75	0.807	0		100	K.EELYQNLTR.E
FALSE	[K].EFSMMFK.[H]	1xTMT6plex [K7]; 1xTMT6plex [N-Term]	0.00237856	1	1	1	Q13813	Q13813 [2327-2333]		0	1377.73	0.971	10.68		100	K.EFSMMFK.H
FALSE	[R].DAEELEK.[W]	1xTMT6plex [K7]; 1xTMT6plex [N-Term]	0.00237856	1	1	1	Q13813	Q13813 [52-58]		0	1291.71	0.828	20.61		100	R.DAEELEK.W
FALSE	[K].HQALQAEIAGHEPR.[I]	1xTMT6plex [N-Term]	0.00258338	1	1	1	Q13813	Q13813 [826-839]		0	1785.96			No Quan Values		K.HQALQAEIAGHEPR.I
FALSE	[K].QEALVAR.[Y]	1xTMT6plex [N-Term]	0.00258338	1	1	1	Q13813	Q13813 [759-765]		0	1015.61	0.834	0.52		100	K.QEALVAR.Y
FALSE	[R].LNHQEFK.[S]	1xTMT6plex [K7]; 1xTMT6plex [N-Term]	0.00258338	1	1	1	Q13813	Q13813 [2343-2349]		0	1373.79	0.625	42.49		100	R.LNHQEFK.S
High	P21333	Filamin-A OS=Homo sapiens OX=9606 GN=FLNA PE=1 SV=4	373.081	33	67	121	58	2647	280.6	6.06	409.42	67	2316	FLNA	11101.9	12024.1	9960.9	12373.5	13692.4	10559.1
Checked	Annotated Sequence	Modifications	Qvality q-value	# Protein Groups	# Proteins	# PSMs	Master Protein Accessions	Positions in Master Proteins	Modifications in Master Proteins	# Missed Cleavages	Theo. MH+ [Da]	Abundance Ratio: (HO) / (WT)	Abundances (Grouped) CV [%]: HO	Quan Info	Channel Occupancy [%]	Sequence in Protein
FALSE	[RK].NDNDTFTVK.[Y]	1xTMT6plex [K9]; 1xTMT6plex [N-Term]	0.00030973	2	2	1	P21333; Q14315	P21333 [829-837]; Q14315 [824-832]		0	1511.81	0.849	24.31	Shared	100	R.NDNDTFTVK.Y
FALSE	[K].LQVEPAVDTSGVQCYGPGIEGQGVFR.[E]	1xCarbamidomethyl [C14]; 1xTMT6plex [N-Term]	0.00030973	1	1	4	P21333	P21333 [1247-1272]		0	2992.5	0.987	39.38		100	K.LQVEPAVDTSGVQCYGPGIEGQGVFR.E
FALSE	[R].LTVSSLQESGLK.[V]	1xTMT6plex [K12]; 1xTMT6plex [N-Term]	0.00030973	1	1	4	P21333	P21333 [2335-2346]		0	1720.03	0.888	14.11		100	R.LTVSSLQESGLK.V
FALSE	[R].IANLQTDLSDGLR.[L]	1xTMT6plex [N-Term]	0.00030973	1	1	3	P21333	P21333 [64-76]		0	1644.91	0.978	27.52		100	R.IANLQTDLSDGLR.L
FALSE	[K].LDVQFSGLTK.[G]	1xTMT6plex [K10]; 1xTMT6plex [N-Term]	0.00030973	1	1	3	P21333	P21333 [907-916]		0	1565.93	0.942	25.3		100	K.LDVQFSGLTK.G
FALSE	[R].VANPSGNLTETYVQDR.[G]	1xTMT6plex [N-Term]	0.00030973	1	1	3	P21333	P21333 [1297-1312]		0	1993.02	0.963	18.21		100	R.VANPSGNLTETYVQDR.G
FALSE	[K].VAQPTITDNK.[D]	1xTMT6plex [K10]; 1xTMT6plex [N-Term]	0.00030973	1	1	3	P21333	P21333 [1815-1824]		0	1544.9	0.976	5.14		100	K.VAQPTITDNK.D
FALSE	[K].VEPGLGADNSVVR.[F]	1xTMT6plex [N-Term]	0.00030973	1	1	3	P21333	P21333 [1020-1032]		0	1541.85	0.902	23.39		100	K.VEPGLGADNSVVR.F
FALSE	[K].VDINTEDLEDGTCR.[V]	1xCarbamidomethyl [C13]; 1xTMT6plex [N-Term]	0.00030973	1	1	2	P21333	P21333 [2090-2103]		0	1865.87	0.973	22.7		100	K.VDINTEDLEDGTCR.V
FALSE	[R].TPCEEILVK.[H]	1xCarbamidomethyl [C3]; 1xTMT6plex [K9]; 1xTMT6plex [N-Term]	0.00030973	1	1	1	P21333	P21333 [2599-2607]		0	1546.89	0.906	31.11		100	R.TPCEEILVK.H
FALSE	[K].VTAQGPGLEPSGNIANK.[T]	1xTMT6plex [K17]; 1xTMT6plex [N-Term]	0.00030973	1	1	1	P21333	P21333 [384-400]		0	2111.19	0.859	12.22		100	K.VTAQGPGLEPSGNIANK.T
FALSE	[K].VTVLFAGQHIAK.[S]	1xTMT6plex [K12]; 1xTMT6plex [N-Term]	0.00030973	1	1	2	P21333	P21333 [356-367]		0	1742.07	1.048	3.85		100	K.VTVLFAGQHIAK.S
FALSE	[K].YTPVQQGPVGVNVTYGGDPIPK.[S]	1xTMT6plex [K22]; 1xTMT6plex [N-Term]	0.00030973	1	1	1	P21333	P21333 [937-958]		0	2744.5	0.82	40.31		100	K.YTPVQQGPVGVNVTYGGDPIPK.S
FALSE	[K].YGGQPVPNFPSK.[L]	1xTMT6plex [K12]; 1xTMT6plex [N-Term]	0.00030973	1	1	2	P21333	P21333 [1235-1246]		0	1748.97	1.085	0.14		100	K.YGGQPVPNFPSK.L
FALSE	[R].VQVQDNEGCPVEALVK.[D]	1xCarbamidomethyl [C9]; 1xTMT6plex [K16]; 1xTMT6plex [N-Term]	0.00030973	1	1	2	P21333	P21333 [709-724]		0	2243.21	0.94	27.01		100	R.VQVQDNEGCPVEALVK.D
FALSE	[K].VLPTHDASK.[V]	1xTMT6plex [K9]; 1xTMT6plex [N-Term]	0.00030973	1	1	2	P21333	P21333 [1539-1547]		0	1425.85	1.005	1.23		100	K.VLPTHDASK.V
FALSE	[K].VGSAADIPINISETDLSLLTATVVPPSGR.[E]	1xTMT6plex [N-Term]	0.00030973	1	1	2	P21333	P21333 [1965-1993]		0	3122.71	1.637	3.45		100	K.VGSAADIPINISETDLSLLTATVVPPSGR.E
FALSE	[K].VGTECGNQK.[V]	1xCarbamidomethyl [C5]; 1xTMT6plex [K9]; 1xTMT6plex [N-Term]	0.00030973	1	1	2	P21333	P21333 [570-578]		0	1450.77	0.822	12.62		100	K.VGTECGNQK.V
FALSE	[R].VNVGAGSHPNK.[V]	1xTMT6plex [K11]; 1xTMT6plex [N-Term]	0.00030973	1	1	2	P21333	P21333 [761-771]		0	1537.89	0.845	25.76		100	R.VNVGAGSHPNK.V
FALSE	[K].VPVHDVTDASK.[V]	1xTMT6plex [K11]; 1xTMT6plex [N-Term]	0.00030973	1	1	2	P21333	P21333 [1440-1450]		0	1625.93	0.873	0.88		100	K.VPVHDVTDASK.V
FALSE	[K].VNQPASFAVSLNGAK.[G]	1xTMT6plex [K15]; 1xTMT6plex [N-Term]	0.00030973	1	1	1	P21333	P21333 [2347-2361]		0	1961.12	0.842	33.31		100	K.VNQPASFAVSLNGAK.G
FALSE	[K].SPFSVAVSPSLDLSK.[I]	1xTMT6plex [K15]; 1xTMT6plex [N-Term]	0.00030973	1	1	2	P21333	P21333 [959-973]		0	1992.14	0.979	24.61		100	K.SPFSVAVSPSLDLSK.I
FALSE	[K].SSFTVDCSK.[A]	1xCarbamidomethyl [C7]; 1xTMT6plex [K9]; 1xTMT6plex [N-Term]	0.00030973	1	1	2	P21333	P21333 [2576-2584]		0	1488.78	0.877	22.63		100	K.SSFTVDCSK.A
FALSE	[K].ETGEHLVHVK.[K]	1xTMT6plex [K10]; 1xTMT6plex [N-Term]	0.00030973	1	1	2	P21333	P21333 [2015-2024]		0	1606.93	0.806	9.56		100	K.ETGEHLVHVK.K
FALSE	[R].ALTQTGGPHVK.[A]	1xTMT6plex [K11]; 1xTMT6plex [N-Term]	0.00030973	1	1	1	P21333	P21333 [1284-1294]		0	1566.94	0.893	20.59		100	R.ALTQTGGPHVK.A
FALSE	[K].FNGTHIPGSPFK.[I]	1xTMT6plex [K12]; 1xTMT6plex [N-Term]	0.00030973	1	1	1	P21333	P21333 [2406-2417]		0	1759.99	1.016	17.55		100	K.FNGTHIPGSPFK.I
FALSE	[K].FNEEHIPDSPFVVPVASPSGDAR.[R]	1xTMT6plex [N-Term]	0.00030973	1	1	2	P21333	P21333 [2311-2333]		0	2696.35	1.037	7.16		100	K.FNEEHIPDSPFVVPVASPSGDAR.R
FALSE	[K].AHVVPCFDASK.[V]	1xCarbamidomethyl [C6]; 1xTMT6plex [K11]; 1xTMT6plex [N-Term]	0.00030973	1	1	2	P21333	P21333 [1152-1162]		0	1688.92	0.932	2.18		100	K.AHVVPCFDASK.V
FALSE	[K].AGNNMLLVGVHGPR.[T]	1xTMT6plex [N-Term]	0.00030973	1	1	1	P21333	P21333 [2585-2598]		0	1663.93	0.903	2.06		100	K.AGNNMLLVGVHGPR.T
FALSE	[R].AGQSAAGAAPGGGVDTR.[D]	1xTMT6plex [N-Term]	0.00030973	1	1	3	P21333	P21333 [8-24]		0	1671.86	0.934	1.05		100	R.AGQSAAGAAPGGGVDTR.D
FALSE	[R].FGGEHVPNSPFQVTALAGDQPSVQPPLR.[S]	1xTMT6plex [N-Term]	0.00030973	1	1	1	P21333	P21333 [1726-1753]		0	3174.65	1.181	43.89		100	R.FGGEHVPNSPFQVTALAGDQPSVQPPLR.S
FALSE	[K].ASGPGLNTTGVPASLPVEFTIDAK.[D]	1xTMT6plex [K24]; 1xTMT6plex [N-Term]	0.00030973	1	1	2	P21333	P21333 [1550-1573]		0	2800.55	0.869	31.21		100	K.ASGPGLNTTGVPASLPVEFTIDAK.D
FALSE	[R].EGPYSISVLYGDEEVPR.[S]	1xTMT6plex [N-Term]	0.00030973	1	1	2	P21333	P21333 [1516-1532]		0	2139.08	0.914	20.81		100	R.EGPYSISVLYGDEEVPR.S
FALSE	[K].ATCAPQHGAPGPGPADASK.[V]	1xCarbamidomethyl [C3]; 1xTMT6plex [K19]; 1xTMT6plex [N-Term]	0.00030973	1	1	1	P21333	P21333 [2541-2559]		0	2248.15	1.315	10.37		100	K.ATCAPQHGAPGPGPADASK.V
FALSE	[R].EAGAGGLAIAVEGPSK.[A]	1xTMT6plex [K16]; 1xTMT6plex [N-Term]	0.00030973	1	1	1	P21333	P21333 [2265-2280]		0	1885.08	0.946	28.72		100	R.EAGAGGLAIAVEGPSK.A
FALSE	[K].AIVDGNLK.[L]	1xTMT6plex [K8]; 1xTMT6plex [N-Term]	0.00030973	3	3	1	P21333; O75369; Q14315	P21333 [128-135]; O75369 [101-108]; Q14315 [121-128]		0	1287.8	0.902	20.51	Shared	100	K.AIVDGNLK.L
FALSE	[R].EATTEFSVDAR.[A]	1xTMT6plex [N-Term]	0.00030973	1	1	2	P21333	P21333 [1273-1283]		0	1454.73	0.916	20.97		100	R.EATTEFSVDAR.A
FALSE	[R].ANLPQSFQVDTSK.[A]	1xTMT6plex [K13]; 1xTMT6plex [N-Term]	0.00030973	1	1	1	P21333	P21333 [1465-1477]		0	1893.05	0.71	33.8		100	R.ANLPQSFQVDTSK.A
FALSE	[K].GLVEPVDVVDNADGTQTVNYVPSR.[E]	1xTMT6plex [N-Term]	0.00030973	1	1	3	P21333	P21333 [1492-1515]		0	2773.42	0.989	7.85		100	K.GLVEPVDVVDNADGTQTVNYVPSR.E
FALSE	[K].GTVEPQLEAR.[G]	1xTMT6plex [N-Term]	0.00030973	1	1	3	P21333	P21333 [428-437]		0	1328.74	1.416	52.35		100	K.GTVEPQLEAR.G
FALSE	[R].DAPQDFHPDR.[V]	1xTMT6plex [N-Term]	0.00030973	1	1	3	P21333	P21333 [665-674]		0	1426.69	0.905	9.69		100	R.DAPQDFHPDR.V
FALSE	[K].DAGEGGLSLAIEGPSK.[A]	1xTMT6plex [K16]; 1xTMT6plex [N-Term]	0.00030973	1	1	1	P21333	P21333 [1892-1907]		0	1959.08	0.948	32.01		100	K.DAGEGGLSLAIEGPSK.A
FALSE	[K].DAGEGLLAVQITDPEGKPK.[K]	2xTMT6plex [K17; K19]; 1xTMT6plex [N-Term]	0.00030973	1	1	1	P21333	P21333 [1574-1592]		0	2625.51	0.952	12.27		100	K.DAGEGLLAVQITDPEGKPK.K
FALSE	[KR].GQHVPGSPFQFTVGPLGEGGAHK.[V]	1xTMT6plex [K23]; 1xTMT6plex [N-Term]	0.00030973	2	2	1	P21333; Q14315	P21333 [2218-2240]; Q14315 [2294-2316]		0	2762.48	0.984	22.15	Shared	100	K.GQHVPGSPFQFTVGPLGEGGAHK.V
FALSE	[K].CAPGVVGPAEADIDFDIIR.[N]	1xCarbamidomethyl [C1]; 1xTMT6plex [N-Term]	0.00030973	1	1	2	P21333	P21333 [810-828]		0	2244.15	1.021	25.63		100	K.CAPGVVGPAEADIDFDIIR.N
FALSE	[R].AWGPGLEGGVVGK.[S]	1xTMT6plex [K13]; 1xTMT6plex [N-Term]	0.00030973	1	1	2	P21333	P21333 [581-593]		0	1684.98	0.976	25.2		100	R.AWGPGLEGGVVGK.S
FALSE	[R].GAGTGGLGLAVEGPSEAK.[M]	1xTMT6plex [K18]; 1xTMT6plex [N-Term]	0.00030973	1	1	1	P21333	P21333 [1382-1399]		0	2029.13	0.977	23.7		100	R.GAGTGGLGLAVEGPSEAK.M
FALSE	[K].GAGSGELK.[V]	1xTMT6plex [K8]; 1xTMT6plex [N-Term]	0.00030973	2	2	1	P21333; Q14315	P21333 [509-516]; Q14315 [503-510]		0	1176.7	0.898	1.31	Shared	100	K.GAGSGELK.V
FALSE	[K].AFGPGLQGGSAGSPAR.[F]	1xTMT6plex [N-Term]	0.00030973	1	1	3	P21333	P21333 [1072-1087]		0	1658.88	0.889	15.11		100	K.AFGPGLQGGSAGSPAR.F
FALSE	[K].CSGPGLSPGMVR.[A]	1xCarbamidomethyl [C1]; 1xTMT6plex [N-Term]	0.000568404	1	1	1	P21333	P21333 [1453-1464]		0	1446.74	0.926	18.32		100	K.CSGPGLSPGMVR.A
FALSE	[R].AVPTGDASK.[C]	1xTMT6plex [K9]; 1xTMT6plex [N-Term]	0.000568404	1	1	1	P21333	P21333 [1636-1644]		0	1303.76	0.902	26.67		100	R.AVPTGDASK.C
FALSE	[R].AGGPGLER.[AG]	1xTMT6plex [N-Term]	0.000568404	2	2	2	P21333; O75369	P21333 [2243-2250]; O75369 [2198-2205]		0	985.563	0.987	2.1	Shared	100	R.AGGPGLER.A
FALSE	[K].IQQNTFTR.[W]	1xTMT6plex [N-Term]	0.000568404	3	3	3	P21333; O75369; Q14315	P21333 [44-51]; O75369 [17-24]; Q14315 [37-44]		0	1236.69	0.912	24.45	Shared	100	K.IQQNTFTR.W
FALSE	[K].AEGPGLSR.[T]	1xTMT6plex [N-Term]	0.000568404	1	1	2	P21333	P21333 [877-884]		0	1015.57	0.891	12.66		100	K.AEGPGLSR.T
FALSE	[R].VTGDDSMR.[M]	1xTMT6plex [N-Term]	0.000568404	1	1	1	P21333	P21333 [1952-1959]		0	1109.55	1	3.86		100	R.VTGDDSMR.M
FALSE	[K].MDCQECPEGYR.[V]	2xCarbamidomethyl [C3; C6]; 1xTMT6plex [N-Term]	0.000568404	1	1	1	P21333	P21333 [2474-2484]		0	1673.69	0.823	33.29		100	K.MDCQECPEGYR.V
FALSE	[K].IVGPSGAAVPCK.[V]	1xCarbamidomethyl [C11]; 1xTMT6plex [K12]; 1xTMT6plex [N-Term]	0.000568404	1	1	1	P21333	P21333 [1008-1019]		0	1613.94	1.008	9.52		100	K.IVGPSGAAVPCK.V
FALSE	[K].LVSIDSK.[A]	1xTMT6plex [K7]; 1xTMT6plex [N-Term]	0.00139174	3	3	3	P21333; O75369; Q14315	P21333 [121-127]; O75369 [94-100]; Q14315 [114-120]		0	1219.77	0.752	15.98	Shared	100	K.LVSIDSK.A
FALSE	[K].VTANNDK.[N]	1xTMT6plex [K7]; 1xTMT6plex [N-Term]	0.00164966	1	1	2	P21333	P21333 [332-338]		0	1219.7	0.909	18.05		100	K.VTANNDK.N
FALSE	[K].DQEFTVK.[S]	1xTMT6plex [K7]; 1xTMT6plex [N-Term]	0.00192392	1	1	1	P21333	P21333 [988-994]		0	1324.75	0.785	10.85		100	K.DQEFTVK.S
FALSE	[R].EEPCLLK.[R]	1xCarbamidomethyl [C4]; 1xTMT6plex [K7]; 1xTMT6plex [N-Term]	0.00237856	1	1	1	P21333	P21333 [1994-2000]		0	1346.78	0.883	24.17		100	R.EEPCLLK.R
FALSE	[R].AEFTVETR.[S]	1xTMT6plex [N-Term]	0.00237856	1	1	1	P21333	P21333 [302-309]		0	1181.64	0.887	10.58		100	R.AEFTVETR.S
FALSE	[KR].GAGGQGK.[VL]	1xTMT6plex [K7]; 1xTMT6plex [N-Term]	0.00237856	2	2	2	P21333; O75369	P21333 [997-1003]; O75369 [970-976]		0	1032.62	0.867	17.53	Shared	100	K.GAGGQGK.V
FALSE	[R].FVPAEMGTHTVSVK.[Y]	1xOxidation [M6]; 1xTMT6plex [K14]; 1xTMT6plex [N-Term]	0.00237856	1	1	1	P21333	P21333 [2202-2215]		0	1977.09			No Quan Values		R.FVPAEMGTHTVSVK.Y
FALSE	[K].VYGPGVAK.[T]	1xTMT6plex [K8]; 1xTMT6plex [N-Term]	0.00258338	1	1	1	P21333	P21333 [774-781]		0	1248.77	0.814	27.48		100	K.VYGPGVAK.T
FALSE	[K].DGTVTVR.[Y]	1xTMT6plex [N-Term]	0.00333498	2	2	1	P21333; O75369	P21333 [1825-1831]; O75369 [1781-1787]		0	976.562	0.881	18.29	Shared	100	K.DGTVTVR.Y
FALSE	[K].ETADFK.[V]	1xTMT6plex [K6]; 1xTMT6plex [N-Term]	0.00966706	1	1	2	P21333	P21333 [499-504]		0	1168.66	0.857	16.78		100	K.ETADFK.V
High	P35749	Myosin-11 OS=Homo sapiens OX=9606 GN=MYH11 PE=1 SV=3	323.235	15	32	1065	4	1972	227.2	5.5	3703.78	32	4629	MYH11	1180.3	1048.9	864.5	1611.5	1174.4	936.8
Checked	Annotated Sequence	Modifications	Qvality q-value	# Protein Groups	# Proteins	# PSMs	Master Protein Accessions	Positions in Master Proteins	Modifications in Master Proteins	# Missed Cleavages	Theo. MH+ [Da]	Abundance Ratio: (HO) / (WT)	Abundances (Grouped) CV [%]: HO	Quan Info	Channel Occupancy [%]	Sequence in Protein
FALSE	[R].NCAAYLK.[L]	1xCarbamidomethyl [C2]; 1xTMT6plex [K7]; 1xTMT6plex [N-Term]	0.00030973	4	4	20	P35580; P35749; P35579; Q7Z406	P35580 [822-828]; P35749 [822-828]; P35579 [815-821]; Q7Z406 [839-845]		0	1297.73	0.986	42.13	Shared	100	R.NCAAYLK.L
FALSE	[KR].QLLQANPILEAFGNAK.[T]	1xTMT6plex [K16]; 1xTMT6plex [N-Term]	0.00030973	3	3	24	P35749; P35579; Q7Z406	P35749 [217-232]; P35579 [210-225]; Q7Z406 [237-252]		0	2185.27	1.089	15.13	Shared	100	K.QLLQANPILEAFGNAK.T
FALSE	[K].NVHELEK.[SV]	1xTMT6plex [K7]; 1xTMT6plex [N-Term]	0.00030973	2	3	9	P35580; P35749	P35580 [1526-1532]; P35749 [1526-1532]		0	1326.78	0.852	30	Shared	100	K.NVHELEK.S
FALSE	[R].NTDQASMPDNTAAQK.[V]	1xTMT6plex [K15]; 1xTMT6plex [N-Term]	0.00030973	2	2	71	P35749; P35579	P35749 [366-380]; P35579 [359-373]		0	2050.03	0.975	38.71	Shared	100	R.NTDQASMPDNTAAQK.V
FALSE	[R].NTDQASMPDNTAAQK.[V]	1xOxidation [M7]; 1xTMT6plex [K15]; 1xTMT6plex [N-Term]	0.00030973	2	2	251	P35749; P35579	P35749 [366-380]; P35579 [359-373]		0	2066.02	0.954	37.61	Shared	100	R.NTDQASMPDNTAAQK.V
FALSE	[K].LQQLFNHTMFILEQEEYQR.[E]	1xOxidation [M9]; 1xTMT6plex [N-Term]	0.00030973	3	3	6	P35580; P35749; P35579	P35580 [483-501]; P35749 [483-501]; P35579 [476-494]		0	2712.37	1.015	35.78	Shared	100	K.LQQLFNHTMFILEQEEYQR.E
FALSE	[KR].KEEELQAALAR.[LVA]	1xTMT6plex [K1]; 1xTMT6plex [N-Term]	0.00030973	3	3	44	P35749; P35579; Q7Z406	P35749 [1088-1098]; P35579 [1081-1091]; Q7Z406 [1105-1115]		1	1716.01	0.975	35.31	Shared	100	K.KEEELQAALAR.L
FALSE	[KR].KFDQLLAEEK.[SNTA]	2xTMT6plex [K1; K10]; 1xTMT6plex [N-Term]	0.00030973	4	4	107	P35580; P35749; P35579; Q7Z406	P35580 [1452-1461]; P35749 [1452-1461]; P35579 [1445-1454]; Q7Z406 [1469-1478]		1	1908.14	0.985	38.57	Shared	100	R.KFDQLLAEEK.N
FALSE	[K].LQQLFNHTMFILEQEEYQR.[E]	1xTMT6plex [N-Term]	0.00030973	3	3	3	P35580; P35749; P35579	P35580 [483-501]; P35749 [483-501]; P35579 [476-494]		0	2696.37	1.201	6.87	Shared	100	K.LQQLFNHTMFILEQEEYQR.E
FALSE	[K].VEDMAELTCLNEASVLHNLR.[E]	1xCarbamidomethyl [C9]; 1xTMT6plex [N-Term]	0.00030973	1	1	5	P35749	P35749 [87-106]		0	2543.28	1.187	28.41		100	K.VEDMAELTCLNEASVLHNLR.E
FALSE	[K].VEDMAELTCLNEASVLHNLR.[E]	1xCarbamidomethyl [C9]; 1xOxidation [M4]; 1xTMT6plex [N-Term]	0.00030973	1	1	2	P35749	P35749 [87-106]		0	2559.27	1.073	34.73		100	K.VEDMAELTCLNEASVLHNLR.E
FALSE	[RK].TQLEELEDELQATEDAK.[L]	1xTMT6plex [K17]; 1xTMT6plex [N-Term]	0.00030973	3	3	87	P35580; P35749; P35579	P35580 [1546-1562]; P35749 [1546-1562]; P35579 [1539-1555]		0	2420.24	1.028	34.54	Shared	100	K.TQLEELEDELQATEDAK.L
FALSE	[RK].TQLEELEDELQATEDAKLR.[L]	1xTMT6plex [K17]; 1xTMT6plex [N-Term]	0.00030973	3	3	1	P35580; P35749; P35579	P35580 [1546-1564]; P35749 [1546-1564]; P35579 [1539-1557]		1	2689.43	1.207	25.57	Shared	100	K.TQLEELEDELQATEDAKLR.L
FALSE	[K].VVSSVLQLGNIVFK.[K]	1xTMT6plex [K14]; 1xTMT6plex [N-Term]	0.00030973	1	1	2	P35749	P35749 [349-362]		0	1961.22	1.695	49.06		100	K.VVSSVLQLGNIVFK.K
FALSE	[K].VKPLLQVTR.[Q]	1xTMT6plex [K2]; 1xTMT6plex [N-Term]	0.00030973	3	3	1	P35580; P35749; Q7Z406	P35580 [841-849]; P35749 [841-849]; Q7Z406 [858-866]		0	1512	0.8	49.67	Shared	100	K.VKPLLQVTR.Q
FALSE	[K].RQQQLTAMK.[V]	1xTMT6plex [K9]; 1xTMT6plex [N-Term]	0.00030973	2	2	7	P35749; P35579	P35749 [809-817]; P35579 [802-810]		1	1561.92	0.83	40.08	Shared	100	K.RQQQLTAMK.V
FALSE	[K].RQQQLTAMK.[V]	1xOxidation [M8]; 1xTMT6plex [K9]; 1xTMT6plex [N-Term]	0.00030973	2	2	18	P35749; P35579	P35749 [809-817]; P35579 [802-810]		1	1577.92	0.969	30.09	Shared	100	K.RQQQLTAMK.V
FALSE	[R].QQQLTAMK.[V]	1xTMT6plex [K8]; 1xTMT6plex [N-Term]	0.00030973	2	2	19	P35749; P35579	P35749 [810-817]; P35579 [803-810]		0	1405.82	0.982	37.56	Shared	100	R.QQQLTAMK.V
FALSE	[R].QQQLTAMK.[V]	1xOxidation [M7]; 1xTMT6plex [K8]; 1xTMT6plex [N-Term]	0.00030973	2	2	72	P35749; P35579	P35749 [810-817]; P35579 [803-810]		0	1421.82	1.013	34.78	Shared	100	R.QQQLTAMK.V
FALSE	[K].RDLGEELEALK.[T]	1xTMT6plex [K11]; 1xTMT6plex [N-Term]	0.00030973	2	2	8	P35749; P35579	P35749 [1142-1152]; P35579 [1135-1145]		1	1731.01	1.111	29.48	Shared	100	K.RDLGEELEALK.T
FALSE	[K].FDQLLAEEK.[SNTA]	1xTMT6plex [K9]; 1xTMT6plex [N-Term]	0.00030973	4	4	23	P35580; P35749; P35579; Q7Z406	P35580 [1453-1461]; P35749 [1453-1461]; P35579 [1446-1454]; Q7Z406 [1470-1478]		0	1550.88	1.047	32.1	Shared	100	K.FDQLLAEEK.N
FALSE	[RK].ALELDPNLYR.[I]	1xTMT6plex [N-Term]	0.00030973	2	2	10	P35580; P35749	P35580 [753-762]; P35749 [753-762]		0	1432.8	0.935	34.95	Shared	100	K.ALELDPNLYR.I
FALSE	[R].ALEEALEAK.[E]	1xTMT6plex [K9]; 1xTMT6plex [N-Term]	0.00030973	2	2	24	P35580; P35749	P35580 [1491-1499]; P35749 [1491-1499]		0	1431.85	0.949	34.29	Shared	100	R.ALEEALEAK.E
FALSE	[R].EDQSILCTGESGAGK.[T]	1xCarbamidomethyl [C7]; 1xTMT6plex [K15]; 1xTMT6plex [N-Term]	0.00030973	4	4	55	P35580; P35749; P35579; Q7Z406	P35580 [170-184]; P35749 [170-184]; P35579 [166-180]; Q7Z406 [190-204]		0	2010.02	1.119	31.96	Shared	100	R.EDQSILCTGESGAGK.T
FALSE	[K].EEELQAALAR.[LVA]	1xTMT6plex [N-Term]	0.00030973	3	3	20	P35749; P35579; Q7Z406	P35749 [1089-1098]; P35579 [1082-1091]; Q7Z406 [1106-1115]		0	1358.75	1.052	27.94	Shared	100	K.EEELQAALAR.L
FALSE	[K].EQADFAVEALAK.[A]	1xTMT6plex [K12]; 1xTMT6plex [N-Term]	0.00030973	2	2	35	P35580; P35749	P35580 [415-426]; P35749 [415-426]		0	1749.98	0.94	31.04	Shared	100	K.EQADFAVEALAK.A
FALSE	[K].ERNTDQASMPDNTAAQK.[V]	1xTMT6plex [K17]; 1xTMT6plex [N-Term]	0.00030973	2	2	1	P35749; P35579	P35749 [364-380]; P35579 [357-373]		1	2335.17	1.204	33.4	Shared	100	K.ERNTDQASMPDNTAAQK.V
FALSE	[K].ERNTDQASMPDNTAAQK.[V]	1xOxidation [M9]; 1xTMT6plex [K17]; 1xTMT6plex [N-Term]	0.00030973	2	2	1	P35749; P35579	P35749 [364-380]; P35579 [357-373]		1	2351.17	1.09	4.74	Shared	100	K.ERNTDQASMPDNTAAQK.V
FALSE	[R].CNGVLEGIR.[I]	1xCarbamidomethyl [C1]; 1xTMT6plex [N-Term]	0.00030973	4	13	27	P35580; P35749; P35579; Q7Z406	P35580 [701-709]; P35749 [701-709]; P35579 [694-702]; Q7Z406 [718-726]		0	1246.68	0.925	40.35	Shared	100	R.CNGVLEGIR.I
FALSE	[R].DLGEELEALK.[T]	1xTMT6plex [K10]; 1xTMT6plex [N-Term]	0.00030973	2	2	44	P35749; P35579	P35749 [1143-1152]; P35579 [1136-1145]		0	1574.9	1.011	38.39	Shared	100	R.DLGEELEALK.T
FALSE	[R].CIIPNHEK.[RK]	1xCarbamidomethyl [C1]; 1xTMT6plex [K8]; 1xTMT6plex [N-Term]	0.00030973	3	3	37	P35580; P35749; P35579	P35580 [678-685]; P35749 [678-685]; P35579 [671-678]		0	1468.83	1	29.39	Shared	100	R.CIIPNHEK.R
FALSE	[R].DRAEAEAR.[E]	1xTMT6plex [N-Term]	0.000568404	3	3	1	P35580; P35749; P35579	P35580 [1472-1479]; P35749 [1472-1479]; P35579 [1465-1472]		1	1146.61	0.973	3.55	Shared	100	R.DRAEAEAR.E
FALSE	[R].KLQAQMK.[D]	2xTMT6plex [K1; K7]; 1xTMT6plex [N-Term]	0.000568404	3	3	1	P35580; P35749; P35579	P35580 [1649-1655]; P35749 [1649-1655]; P35579 [1642-1648]		1	1533.98	0.77	50.21	Shared	100	R.KLQAQMK.D
FALSE	[R].TVGQLYK.[E]	1xTMT6plex [K7]; 1xTMT6plex [N-Term]	0.00139174	4	4	13	P35580; P35749; P35579; Q7Z406	P35580 [652-658]; P35749 [652-658]; P35579 [645-651]; Q7Z406 [669-675]		0	1266.78	0.97	40.57	Shared	100	R.TVGQLYK.E
FALSE	[K].NFINSPVAQADWAAK.[R]	1xTMT6plex [K15]; 1xTMT6plex [N-Term]	0.00258338	1	1	6	P35749	P35749 [19-33]		0	2090.14	1.035	48.43		100	K.NFINSPVAQADWAAK.R
FALSE	[K].KQELEEILHEMEAR.[L]	1xOxidation [M11]; 1xTMT6plex [K1]; 1xTMT6plex [N-Term]	0.00258338	1	1	2	P35749	P35749 [917-930]		1	2229.19	0.851	22.68		100	K.KQELEEILHEMEAR.L
FALSE	[R].IVFQEFR.[Q]	1xTMT6plex [N-Term]	0.00428502	2	2	7	P35580; P35749	P35580 [719-725]; P35749 [719-725]		0	1167.67	0.918	29.11	Shared	100	R.IVFQEFR.Q
FALSE	[RK].NDNSSR.[F]	1xTMT6plex [N-Term]	0.00813383	8	24	1	O00159; P35580; P35749; Q9Y4I1; P35579; O43795; Q7Z406; O94832	O00159 [192-197]; P35580 [236-241]; P35749 [236-241]; Q9Y4I1 [214-219]; P35579 [229-234]; O43795 [160-165]; Q7Z406 [256-261]; O94832 [156-161]		0	921.459	0.893	42.41	Shared	100	K.NDNSSR.F
High	P04264	Keratin, type II cytoskeletal 1 OS=Homo sapiens OX=9606 GN=KRT1 PE=1 SV=6	311.602	55	43	261	37	644	66	8.12	791.75	43	3848	KRT1	30529.5	34423.1	40566.3	22976	31016.8	38203.4
Checked	Annotated Sequence	Modifications	Qvality q-value	# Protein Groups	# Proteins	# PSMs	Master Protein Accessions	Positions in Master Proteins	Modifications in Master Proteins	# Missed Cleavages	Theo. MH+ [Da]	Abundance Ratio: (HO) / (WT)	Abundances (Grouped) CV [%]: HO	Quan Info	Channel Occupancy [%]	Sequence in Protein
FALSE	[KR].NKYEDEINK.[HR]	2xTMT6plex [K2; K9]; 1xTMT6plex [N-Term]	0.00030973	5	7	1	P04264; P04259; P02538; P05787; P13647	P04264 [268-276]; P04259 [251-259]; P02538 [251-259]; P05787 [177-185]; P13647 [256-264]		1	1840.04	0.712	38.11	Shared	100	R.NKYEDEINK.R
FALSE	[K].NKLNDLEDALQQAK.[E]	2xTMT6plex [K2; K14]; 1xTMT6plex [N-Term]	0.00030973	1	1	2	P04264	P04264 [442-455]		1	2287.32	0.852	37.29		100	K.NKLNDLEDALQQAK.E
FALSE	[K].QISNLQQSISDAEQR.[G]	1xTMT6plex [N-Term]	0.00030973	1	1	8	P04264	P04264 [418-432]		0	1946.01	0.893	34.84		100	K.QISNLQQSISDAEQR.G
FALSE	[K].QISNLQQSISDAEQRGENALK.[D]	1xTMT6plex [K21]; 1xTMT6plex [N-Term]	0.00030973	1	1	2	P04264	P04264 [418-438]		1	2787.5	0.681	62.92		100	K.QISNLQQSISDAEQRGENALK.D
FALSE	[K].NMQDMVEDYR.[N]	1xTMT6plex [N-Term]	0.00030973	1	1	3	P04264	P04264 [258-267]		0	1529.69	0.863	32.21		100	K.NMQDMVEDYR.N
FALSE	[K].NMQDMVEDYR.[N]	1xOxidation [M]; 1xTMT6plex [N-Term]	0.00030973	1	1	13	P04264	P04264 [258-267]		0	1545.69	0.861	59.05		100	K.NMQDMVEDYR.N
FALSE	[R].NSKIEISELNR.[V]	1xTMT6plex [K3]; 1xTMT6plex [N-Term]	0.00030973	1	1	1	P04264	P04264 [393-403]		1	1761.03	0.907	4.29		100	R.NSKIEISELNR.V
FALSE	[K].IEISELNR.[V]	1xTMT6plex [N-Term]	0.00030973	2	2	5	P35908; P04264	P35908 [394-401]; P04264 [396-403]		0	1202.69	0.787	39.14	Shared	100	K.IEISELNR.V
FALSE	[K].LNDLEDALQQAK.[E]	1xTMT6plex [K12]; 1xTMT6plex [N-Term]	0.00030973	1	1	9	P04264	P04264 [444-455]		0	1816.02	0.821	56.85		100	K.LNDLEDALQQAK.E
FALSE	[R].TNAENEFVTIK.[K]	1xTMT6plex [K11]; 1xTMT6plex [N-Term]	0.00030973	1	1	13	P04264	P04264 [278-288]		0	1723.96	0.868	60.41		100	R.TNAENEFVTIK.K
FALSE	[R].TNAENEFVTIKK.[D]	2xTMT6plex [K11; K12]; 1xTMT6plex [N-Term]	0.00030973	1	1	2	P04264	P04264 [278-289]		1	2081.22	0.831	28.5		100	R.TNAENEFVTIKK.D
FALSE	[R].TLLEGEESR.[M]	1xTMT6plex [N-Term]	0.00030973	1	1	11	P04264	P04264 [484-492]		0	1262.68	0.894	35.57		100	R.TLLEGEESR.M
FALSE	[K].WELLQQVDTSTR.[T]	1xTMT6plex [N-Term]	0.00030973	1	1	5	P04264	P04264 [212-223]		0	1704.91	0.846	62.43		100	K.WELLQQVDTSTR.T
FALSE	[K].YEELQITAGR.[H]	1xTMT6plex [N-Term]	0.00030973	2	2	14	P04264; P04259	P04264 [377-386]; P04259 [360-369]		0	1408.76	0.856	40.58	Shared	100	K.YEELQITAGR.H
FALSE	[KR].YEDEINK.[HR]	1xTMT6plex [K7]; 1xTMT6plex [N-Term]	0.00030973	7	12	7	P35908; P04264; P04259; P02538; P12035; P05787; P13647	P35908 [268-274]; P04264 [270-276]; P04259 [253-259]; P02538 [253-259]; P12035 [290-296]; P05787 [179-185]; P13647 [258-264]		0	1368.74	0.882	62.49	Shared	100	K.YEDEINK.R
FALSE	[K].RTNAENEFVTIKK.[D]	2xTMT6plex [K12; K13]; 1xTMT6plex [N-Term]	0.00030973	1	1	1	P04264	P04264 [277-289]		2	2237.32	0.694	57.14		100	K.RTNAENEFVTIKK.D
FALSE	[K].SLNNQFASFIDK.[V]	1xTMT6plex [K12]; 1xTMT6plex [N-Term]	0.00030973	1	1	6	P04264	P04264 [186-197]		0	1842.02	0.86	42.46		100	K.SLNNQFASFIDK.V
FALSE	[R].SGGGFSSGSAGIINYQR.[R]	1xTMT6plex [N-Term]	0.00030973	1	1	8	P04264	P04264 [13-29]		0	1886.96	0.936	7.16		100	R.SGGGFSSGSAGIINYQR.R
FALSE	[R].SGGGFSSGSAGIINYQRR.[T]	1xTMT6plex [N-Term]	0.00030973	1	1	1	P04264	P04264 [13-30]		1	2043.06	1.053	3.96		100	R.SGGGFSSGSAGIINYQRR.T
FALSE	[R].SLDLDSIIAEVK.[A]	1xTMT6plex [K12]; 1xTMT6plex [N-Term]	0.00030973	1	1	9	P04264	P04264 [344-355]		0	1761.04	0.907	55.28		100	R.SLDLDSIIAEVK.A
FALSE	[K].SISISVAR.[G]	1xTMT6plex [N-Term]	0.00030973	1	1	3	P04264	P04264 [75-82]		0	1061.65	1.052	1.8		100	K.SISISVAR.G
FALSE	[R].THNLEPYFESFINNLR.[R]	1xTMT6plex [N-Term]	0.00030973	1	1	1	P04264	P04264 [224-239]		0	2223.14	0.949	6.41		100	R.THNLEPYFESFINNLR.R
FALSE	[R].SLVNLGGSK.[S]	1xTMT6plex [K9]; 1xTMT6plex [N-Term]	0.00030973	1	1	2	P04264	P04264 [66-74]		0	1332.83	1.107	1.67		100	R.SLVNLGGSK.S
FALSE	[R].SLVNLGGSKSISISVAR.[G]	1xTMT6plex [K9]; 1xTMT6plex [N-Term]	0.00030973	1	1	6	P04264	P04264 [66-82]		1	2146.3	0.949	36.34		100	R.SLVNLGGSKSISISVAR.G
FALSE	[K].SSGGSSSVK.[F]	1xTMT6plex [K9]; 1xTMT6plex [N-Term]	0.00030973	1	1	3	P04264	P04264 [625-633]		0	1253.71	1.867	72.1		100	K.SSGGSSSVK.F
FALSE	[K].DVDGAYMTK.[V]	1xTMT6plex [K9]; 1xTMT6plex [N-Term]	0.00030973	1	1	5	P04264	P04264 [290-298]		0	1457.77	0.928	60		100	K.DVDGAYMTK.V
FALSE	[R].DYQELMNTK.[L]	1xTMT6plex [K9]; 1xTMT6plex [N-Term]	0.00030973	1	1	5	P04264	P04264 [464-472]		0	1599.85	0.893	45.36		100	R.DYQELMNTK.L
FALSE	[R].FLEQQNQVLQTK.[W]	1xTMT6plex [K12]; 1xTMT6plex [N-Term]	0.00030973	2	3	10	P35908; P04264	P35908 [198-209]; P04264 [200-211]		0	1934.11	0.866	47.62	Shared	100	R.FLEQQNQVLQTK.W
FALSE	[K].AQYEDIAQK.[S]	1xTMT6plex [K9]; 1xTMT6plex [N-Term]	0.00030973	1	1	4	P04264	P04264 [356-364]		0	1523.85	0.856	48.77		100	K.AQYEDIAQK.S
FALSE	[R].GGSGGGGGGSSGGR.[G]	1xTMT6plex [N-Term]	0.00030973	1	1	2	P04264	P04264 [589-602]		0	1235.59	0.848	0.66		100	R.GGSGGGGGGSSGGR.G
FALSE	[R].GGGGGGYGSGGSSYGSGGGSYGSGGGGGGGR.[G]	1xTMT6plex [N-Term]	0.00030973	1	1	9	P04264	P04264 [519-549]		0	2613.11	1.115	26.94		100	R.GGGGGGYGSGGSSYGSGGGSYGSGGGGGGGR.G
FALSE	[K].AEAESLYQSK.[Y]	1xTMT6plex [K10]; 1xTMT6plex [N-Term]	0.00030973	1	1	11	P04264	P04264 [367-376]		0	1583.87	0.815	52.67		100	K.AEAESLYQSK.Y
FALSE	[R].GSSSGGVK.[S]	1xTMT6plex [K8]; 1xTMT6plex [N-Term]	0.00030973	1	1	8	P04264	P04264 [617-624]		0	1136.67	1.192	8.33		100	R.GSSSGGVK.S
FALSE	[R].GSSSGGVKSSGGSSSVK.[F]	2xTMT6plex [K8; K17]; 1xTMT6plex [N-Term]	0.00030973	1	1	4	P04264	P04264 [617-633]		1	2142.2	0.773	7.89		100	R.GSSSGGVKSSGGSSSVK.F
FALSE	[R].GSGGGSSGGSIGGR.[G]	1xTMT6plex [N-Term]	0.00030973	1	1	17	P04264	P04264 [603-616]		0	1321.67	0.949	6.97		100	R.GSGGGSSGGSIGGR.G
FALSE	[R].GSGGGSSGGSIGGRGSSSGGVK.[S]	1xTMT6plex [K22]; 1xTMT6plex [N-Term]	0.00030973	1	1	1	P04264	P04264 [603-624]		1	2210.15	0.808	7.38		100	R.GSGGGSSGGSIGGRGSSSGGVK.S
FALSE	[K].FVSTTYSGVTR.[-]	1xTMT6plex [N-Term]	0.00030973	1	1	1	P04264	P04264 [634-644]		0	1446.78	1.892	25.67		100	K.FVSTTYSGVTR.-
FALSE	[R].SEIDNVK.[K]	1xTMT6plex [K7]; 1xTMT6plex [N-Term]	0.000568404	1	1	8	P04264	P04264 [410-416]		0	1262.74	0.782	64.46		100	R.SEIDNVK.K
FALSE	[K].DVDGAYMTK.[V]	1xOxidation [M7]; 1xTMT6plex [K9]; 1xTMT6plex [N-Term]	0.000568404	1	1	11	P04264	P04264 [290-298]		0	1473.77	0.749	59.44		100	K.DVDGAYMTK.V
FALSE	[R].DYQELMNTK.[L]	1xOxidation [M6]; 1xTMT6plex [K9]; 1xTMT6plex [N-Term]	0.000568404	1	1	11	P04264	P04264 [464-472]		0	1615.84	0.713	48.16		100	R.DYQELMNTK.L
FALSE	[K].LNDLEDALQQAKEDLAR.[L]	1xTMT6plex [K12]; 1xTMT6plex [N-Term]	0.000568404	1	1	1	P04264	P04264 [444-460]		1	2400.31			No Quan Values		K.LNDLEDALQQAKEDLAR.L
FALSE	[KR].YEDEINKR.[T]	1xTMT6plex [K7]; 1xTMT6plex [N-Term]	0.000568404	7	11	4	P35908; P04264; P04259; P02538; P12035; P05787; P13647	P35908 [268-275]; P04264 [270-277]; P04259 [253-260]; P02538 [253-260]; P12035 [290-297]; P05787 [179-186]; P13647 [258-265]		1	1524.84	0.85	50.12	Shared	100	K.YEDEINKR.T
FALSE	[R].TTSSSTRR.[S]	1xTMT6plex [N-Term]	0.000568404	1	1	1	P04264	P04264 [31-38]		1	1124.62	0.972	36.58		100	R.TTSSSTRR.S
FALSE	[R].SEIDNVKK.[Q]	2xTMT6plex [K7; K8]; 1xTMT6plex [N-Term]	0.0008677	1	1	1	P04264	P04264 [410-417]		1	1619.99	0.701	74.08		100	R.SEIDNVKK.Q
FALSE	[K].NMQDMVEDYR.[N]	2xOxidation [M2; M5]; 1xTMT6plex [N-Term]	0.00139174	1	1	9	P04264	P04264 [258-267]		0	1561.68	0.827	47.14		100	K.NMQDMVEDYR.N
FALSE	[R].TTSSSTR.[R]	1xTMT6plex [N-Term]	0.00797596	1	1	1	P04264	P04264 [31-37]		0	968.521	1.225	4.05		100	R.TTSSSTR.R
FALSE	[R].VDQLKSDQSR.[L]	1xTMT6plex [K5]; 1xTMT6plex [N-Term]	0.00966706	1	1	1	P04264	P04264 [242-251]		1	1633.93	1.124	21.98		100	R.VDQLKSDQSR.L
High	Q01082	Spectrin beta chain, non-erythrocytic 1 OS=Homo sapiens OX=9606 GN=SPTBN1 PE=1 SV=2	244.378	27	55	96	55	2364	274.4	5.57	295.28	55	6711	SPTBN1	9112	10075.4	8009	10366.8	11796.4	8605.5
Checked	Annotated Sequence	Modifications	Qvality q-value	# Protein Groups	# Proteins	# PSMs	Master Protein Accessions	Positions in Master Proteins	Modifications in Master Proteins	# Missed Cleavages	Theo. MH+ [Da]	Abundance Ratio: (HO) / (WT)	Abundances (Grouped) CV [%]: HO	Quan Info	Channel Occupancy [%]	Sequence in Protein
FALSE	[K].NEIDNYEEDYQK.[M]	1xTMT6plex [K12]; 1xTMT6plex [N-Term]	0.00030973	1	1	1	Q01082	Q01082 [1109-1120]		0	2017.98	0.725	51.68		100	K.NEIDNYEEDYQK.M
FALSE	[R].ITDLYTDLR.[D]	1xTMT6plex [N-Term]	0.00030973	1	1	4	Q01082	Q01082 [75-83]		0	1338.75	0.927	20.7		100	R.ITDLYTDLR.D
FALSE	[R].LVSDGNINSDR.[I]	1xTMT6plex [N-Term]	0.00030973	1	1	3	Q01082	Q01082 [1235-1245]		0	1418.74	0.95	2.56		100	R.LVSDGNINSDR.I
FALSE	[R].LVSQDNFGFDLPAVEAATK.[K]	1xTMT6plex [K19]; 1xTMT6plex [N-Term]	0.00030973	1	1	2	Q01082	Q01082 [444-462]		0	2480.34	0.809	39.81		100	R.LVSQDNFGFDLPAVEAATK.K
FALSE	[R].LTTLELLEVR.[R]	1xTMT6plex [N-Term]	0.00030973	1	1	2	Q01082	Q01082 [2079-2088]		0	1415.87	0.817	38.73		100	R.LTTLELLEVR.R
FALSE	[K].QALQDTLALYK.[M]	1xTMT6plex [K11]; 1xTMT6plex [N-Term]	0.00030973	1	1	2	Q01082	Q01082 [843-853]		0	1722.02	0.815	25.23		100	K.QALQDTLALYK.M
FALSE	[R].LEMNLGLQK.[I]	1xTMT6plex [K9]; 1xTMT6plex [N-Term]	0.00030973	1	1	1	Q01082	Q01082 [524-532]		0	1503.9			No Quan Values		R.LEMNLGLQK.I
FALSE	[K].LEDLEVIQHR.[F]	1xTMT6plex [N-Term]	0.00030973	1	1	6	Q01082	Q01082 [881-890]		0	1480.83	1.063	3.34		100	K.LEDLEVIQHR.F
FALSE	[K].HLLGVEDLLQK.[H]	1xTMT6plex [K11]; 1xTMT6plex [N-Term]	0.00030973	1	1	1	Q01082	Q01082 [559-569]		0	1723.05	0.813	33.64		100	K.HLLGVEDLLQK.H
FALSE	[K].KQEDFMTTMDANEEK.[I]	2xTMT6plex [K1; K15]; 1xTMT6plex [N-Term]	0.00030973	1	1	1	Q01082	Q01082 [1210-1224]		1	2504.26	0.797	46.01		100	K.KQEDFMTTMDANEEK.I
FALSE	[K].INAVVETGR.[R]	1xTMT6plex [N-Term]	0.00030973	1	1	1	Q01082	Q01082 [1225-1233]		0	1187.69	0.869	13.25		100	K.INAVVETGR.R
FALSE	[R].LNDGNEYLFQAK.[D]	1xTMT6plex [K12]; 1xTMT6plex [N-Term]	0.00030973	1	1	1	Q01082	Q01082 [2279-2290]		0	1870.01	1.18	3.21		100	R.LNDGNEYLFQAK.D
FALSE	[K].LLEVLSGER.[L]	1xTMT6plex [N-Term]	0.00030973	1	1	3	Q01082	Q01082 [91-99]		0	1244.74	0.848	38.02		100	K.LLEVLSGER.L
FALSE	[R].VAVVNQIAR.[Q]	1xTMT6plex [N-Term]	0.00030973	1	1	1	Q01082	Q01082 [905-913]		0	1198.75	0.754	25.36		100	R.VAVVNQIAR.Q
FALSE	[R].TQETPSAQMEGFLNR.[K]	1xTMT6plex [N-Term]	0.00030973	1	1	2	Q01082	Q01082 [2192-2206]		0	1937.96	0.921	22.31		100	R.TQETPSAQMEGFLNR.K
FALSE	[R].TQTAIASEDMPNTLTEAEK.[L]	1xTMT6plex [K19]; 1xTMT6plex [N-Term]	0.00030973	1	1	2	Q01082	Q01082 [1081-1099]		0	2508.29	1.043	0.89		100	R.TQTAIASEDMPNTLTEAEK.L
FALSE	[K].VLDNAIETEK.[M]	1xTMT6plex [K10]; 1xTMT6plex [N-Term]	0.00030973	1	1	4	Q01082	Q01082 [293-302]		0	1589.92	0.798	27.67		100	K.VLDNAIETEK.M
FALSE	[K].VIESTQDLGNDLAGVMALQR.[K]	1xOxidation [M16]; 1xTMT6plex [N-Term]	0.00030973	1	1	2	Q01082	Q01082 [977-996]		0	2375.24	0.896	16.97		100	K.VIESTQDLGNDLAGVMALQR.K
FALSE	[K].SLLDACESR.[R]	1xCarbamidomethyl [C6]; 1xTMT6plex [N-Term]	0.00030973	1	1	1	Q01082	Q01082 [1895-1903]		0	1279.65	1.021	9.49		100	K.SLLDACESR.R
FALSE	[K].QQMLENQMEVR.[K]	1xOxidation [M8]; 1xTMT6plex [N-Term]	0.00030973	1	1	1	Q01082	Q01082 [1422-1432]		0	1650.81	0.834	23.39		100	K.QQMLENQMEVR.K
FALSE	[K].TALPAQSAATLPAR.[T]	1xTMT6plex [N-Term]	0.00030973	1	1	2	Q01082	Q01082 [2178-2191]		0	1596.93	0.873	31.77		100	K.TALPAQSAATLPAR.T
FALSE	[R].SQNIVTDSSSLSAEAIR.[Q]	1xTMT6plex [N-Term]	0.00030973	1	1	3	Q01082	Q01082 [1548-1564]		0	2007.06	0.891	20.97		100	R.SQNIVTDSSSLSAEAIR.Q
FALSE	[R].DVEDEILWVGER.[M]	1xTMT6plex [N-Term]	0.00030973	1	1	1	Q01082	Q01082 [1493-1504]		0	1688.87	0.759	11.68		100	R.DVEDEILWVGER.M
FALSE	[R].EVDDLEQWIAER.[E]	1xTMT6plex [N-Term]	0.00030973	1	1	1	Q01082	Q01082 [1706-1717]		0	1731.88	0.82	42.28		100	R.EVDDLEQWIAER.E
FALSE	[K].FMELLEPLNER.[K]	1xTMT6plex [N-Term]	0.00030973	1	1	2	Q01082	Q01082 [1467-1477]		0	1619.87	0.913	33.97		100	K.FMELLEPLNER.K
FALSE	[R].FQIQDISVETEDNK.[E]	1xTMT6plex [K14]; 1xTMT6plex [N-Term]	0.00030973	1	2	1	Q01082	Q01082 [157-170]		0	2124.12	0.912	22.49		100	R.FQIQDISVETEDNK.E
FALSE	[R].DQNTVETLQR.[M]	1xTMT6plex [N-Term]	0.00030973	1	1	1	Q01082	Q01082 [1835-1844]		0	1432.76	1.501	50.83		100	R.DQNTVETLQR.M
FALSE	[R].FESLEPEMNNQASR.[V]	1xTMT6plex [N-Term]	0.00030973	1	1	2	Q01082	Q01082 [891-904]		0	1880.9	0.678	33.47		100	R.FESLEPEMNNQASR.V
FALSE	[R].DTGNIGQER.[V]	1xTMT6plex [N-Term]	0.00030973	1	1	1	Q01082	Q01082 [1746-1754]		0	1218.63	0.943	12		100	R.DTGNIGQER.V
FALSE	[K].EIEELQSQAQALSQEGK.[S]	1xTMT6plex [K17]; 1xTMT6plex [N-Term]	0.00030973	1	1	2	Q01082	Q01082 [1435-1451]		0	2346.26	0.843	25.33		100	K.EIEELQSQAQALSQEGK.S
FALSE	[R].EIGQSVDEVEK.[L]	1xTMT6plex [K11]; 1xTMT6plex [N-Term]	0.00030973	1	1	3	Q01082	Q01082 [2044-2054]		0	1690.93	0.866	23.8		100	R.EIGQSVDEVEK.L
FALSE	[R].AQTLPTSVVTITSESSPGK.[R]	1xTMT6plex [K19]; 1xTMT6plex [N-Term]	0.00030973	1	1	2	Q01082	Q01082 [2326-2344]		0	2361.33	1.023	18.85		100	R.AQTLPTSVVTITSESSPGK.R
FALSE	[R].EQWANLEQLSAIR.[K]	1xTMT6plex [N-Term]	0.00030973	1	1	1	Q01082	Q01082 [724-736]		0	1786.96	0.866	44.32		100	R.EQWANLEQLSAIR.K
FALSE	[K].EQWLNNMQIPEK.[L]	1xTMT6plex [K12]; 1xTMT6plex [N-Term]	0.00030973	1	1	1	Q01082	Q01082 [869-880]		0	1988.07	0.901	0.54		100	K.EQWLNNMQIPEK.L
FALSE	[R].EASLGEASK.[L]	1xTMT6plex [K9]; 1xTMT6plex [N-Term]	0.00030973	1	1	3	Q01082	Q01082 [1055-1063]		0	1349.77	0.786	20.08		100	R.EASLGEASK.L
FALSE	[R].ENEVLEAWK.[S]	1xTMT6plex [K9]; 1xTMT6plex [N-Term]	0.00030973	1	1	1	Q01082	Q01082 [1886-1894]		0	1575.88	0.883	32.74		100	R.ENEVLEAWK.S
FALSE	[K].GNLEVLLFTIQSK.[ML]	1xTMT6plex [K13]; 1xTMT6plex [N-Term]	0.00030973	1	2	1	Q01082	Q01082 [360-372]		0	1920.16	1	15.24		100	K.GNLEVLLFTIQSK.M
FALSE	[K].DEQSAVSMLK.[K]	1xTMT6plex [K10]; 1xTMT6plex [N-Term]	0.00030973	1	1	1	Q01082	Q01082 [1623-1632]		0	1565.86	0.772	36.2		100	K.DEQSAVSMLK.K
FALSE	[R].GVNASAQK.[F]	1xTMT6plex [K8]; 1xTMT6plex [N-Term]	0.00030973	1	1	2	Q01082	Q01082 [586-593]		0	1232.74	0.732	32.44		100	R.GVNASAQK.F
FALSE	[K].DLTSVNILLK.[K]	1xTMT6plex [K10]; 1xTMT6plex [N-Term]	0.00030973	1	2	1	Q01082	Q01082 [1411-1420]		0	1573.99	0.849	47.78		100	K.DLTSVNILLK.K
FALSE	[K].GEQVSQNGLPAEQGSPR.[M]	1xTMT6plex [N-Term]	0.00030973	1	1	1	Q01082	Q01082 [2124-2140]		0	1983.01	0.981	14.63		100	K.GEQVSQNGLPAEQGSPR.M
FALSE	[K].AELFTQSCADLDK.[W]	1xCarbamidomethyl [C8]; 1xTMT6plex [K13]; 1xTMT6plex [N-Term]	0.00030973	1	1	1	Q01082	Q01082 [1382-1394]		0	1956.01	0.891	34.18		100	K.AELFTQSCADLDK.W
FALSE	[K].ILSSDDYGK.[D]	1xTMT6plex [K9]; 1xTMT6plex [N-Term]	0.000568404	1	1	1	Q01082	Q01082 [660-668]		0	1455.81	0.825	36.87		100	K.ILSSDDYGK.D
FALSE	[K].MWEVLESTTQTK.[A]	1xTMT6plex [K12]; 1xTMT6plex [N-Term]	0.000568404	1	1	1	Q01082	Q01082 [1361-1372]		0	1911.03	1.047	11.01		100	K.MWEVLESTTQTK.A
FALSE	[K].EIQGHQPR.[I]	1xTMT6plex [N-Term]	0.000568404	1	1	2	Q01082	Q01082 [1533-1540]		0	1193.66	0.738	4.78		100	K.EIQGHQPR.I
FALSE	[K].EGMQLISEKPETEAVVK.[E]	1xOxidation [M3]; 2xTMT6plex [K9; K17]; 1xTMT6plex [N-Term]	0.000568404	1	1	2	Q01082	Q01082 [1336-1352]		0	2591.46	0.722	28.98		100	K.EGMQLISEKPETEAVVK.E
FALSE	[K].EGMQLISEKPETEAVVK.[E]	2xTMT6plex [K9; K17]; 1xTMT6plex [N-Term]	0.000568404	1	1	1	Q01082	Q01082 [1336-1352]		0	2575.46	0.878	44.5		100	K.EGMQLISEKPETEAVVK.E
FALSE	[K].LLQLTEK.[R]	1xTMT6plex [K7]; 1xTMT6plex [N-Term]	0.0008677	1	1	2	Q01082	Q01082 [1992-1998]		0	1302.84	0.789	37.64		100	K.LLQLTEK.R
FALSE	[R].IDDIFER.[S]	1xTMT6plex [N-Term]	0.00237856	1	1	2	Q01082	Q01082 [1541-1547]		0	1136.61	0.832	26.86		100	R.IDDIFER.S
FALSE	[R].TVEKPPK.[F]	2xTMT6plex [K4; K7]; 1xTMT6plex [N-Term]	0.00237856	1	3	1	Q01082	Q01082 [349-355]		0	1485.96	0.773	33.13		100	R.TVEKPPK.F
FALSE	[R].AFEDEMSGR.[S]	1xOxidation [M6]; 1xTMT6plex [N-Term]	0.00237856	1	1	1	Q01082	Q01082 [682-690]		0	1286.59	0.82	14.19		100	R.AFEDEMSGR.S
FALSE	[K].EVAELTR.[L]	1xTMT6plex [N-Term]	0.00237856	1	1	1	Q01082	Q01082 [833-839]		0	1046.6	0.85	22.48		100	K.EVAELTR.L
FALSE	[R].LSGIEER.[Y]	1xTMT6plex [N-Term]	0.00258338	1	1	3	Q01082	Q01082 [824-830]		0	1032.59	0.841	24.36		100	R.LSGIEER.Y
FALSE	[KR].LISDINK.[A]	1xTMT6plex [K7]; 1xTMT6plex [N-Term]	0.00258338	1	2	1	Q01082	Q01082 [388-394]		0	1260.79	0.886	31.25		100	K.LISDINK.A
FALSE	[K].ALAVEGK.[R]	1xTMT6plex [K7]; 1xTMT6plex [N-Term]	0.00428502	1	3	2	Q01082	Q01082 [282-288]		0	1145.73	1.156	47.44		100	K.ALAVEGK.R
FALSE	[R].ETASELLMR.[L]	1xTMT6plex [N-Term]	0.00616547	1	1	1	Q01082	Q01082 [1262-1270]		0	1278.69	0.889	30.84		100	R.ETASELLMR.L
High	P13645	Keratin, type I cytoskeletal 10 OS=Homo sapiens OX=9606 GN=KRT10 PE=1 SV=6	243.342	52	29	159	23	584	58.8	5.21	525.71	29	3858	KRT10	21338.1	21317.9	27152.9	16768.6	22691.9	20027.1
Checked	Annotated Sequence	Modifications	Qvality q-value	# Protein Groups	# Proteins	# PSMs	Master Protein Accessions	Positions in Master Proteins	Modifications in Master Proteins	# Missed Cleavages	Theo. MH+ [Da]	Abundance Ratio: (HO) / (WT)	Abundances (Grouped) CV [%]: HO	Quan Info	Channel Occupancy [%]	Sequence in Protein
FALSE	[R].ISSSKGSLGGGFSSGGFSGGSFSR.[G]	1xTMT6plex [K5]; 1xTMT6plex [N-Term]	0.00030973	1	1	1	P13645	P13645 [36-59]		1	2668.37	1.452	71.09		100	R.ISSSKGSLGGGFSSGGFSGGSFSR.G
FALSE	[K].NQILNLTTDNANILLQIDNAR.[L]	1xTMT6plex [N-Term]	0.00030973	1	1	1	P13645	P13645 [208-228]		0	2596.43	0.978	7.56		100	K.NQILNLTTDNANILLQIDNAR.L
FALSE	[R].NVSTGDVNVEMNAAPGVDLTQLLNNMR.[S]	1xOxidation [M11]; 1xTMT6plex [N-Term]	0.00030973	1	1	2	P13645	P13645 [296-322]		0	3117.55	0.943	17.07		100	R.NVSTGDVNVEMNAAPGVDLTQLLNNMR.S
FALSE	[R].NVSTGDVNVEMNAAPGVDLTQLLNNMR.[S]	2xOxidation [M11; M26]; 1xTMT6plex [N-Term]	0.00030973	1	1	4	P13645	P13645 [296-322]		0	3133.55	0.951	4.05		100	R.NVSTGDVNVEMNAAPGVDLTQLLNNMR.S
FALSE	[R].NVQALEIELQSQLALK.[Q]	1xTMT6plex [K16]; 1xTMT6plex [N-Term]	0.00030973	1	1	1	P13645	P13645 [371-386]		0	2255.34	1	19.75		100	R.NVQALEIELQSQLALK.Q
FALSE	[R].LENEIQTYR.[S]	1xTMT6plex [N-Term]	0.00030973	1	1	5	P13645	P13645 [442-450]		0	1394.75	0.895	41.85		100	R.LENEIQTYR.S
FALSE	[K].VTMQNLNDR.[L]	1xTMT6plex [N-Term]	0.00030973	3	7	6	P02533; P13645; P08779	P02533 [117-125]; P13645 [148-156]; P08779 [119-127]		0	1319.69	0.961	33.26	Shared	100	K.VTMQNLNDR.L
FALSE	[K].VTMQNLNDR.[L]	1xOxidation [M3]; 1xTMT6plex [N-Term]	0.00030973	3	7	7	P02533; P13645; P08779	P02533 [117-125]; P13645 [148-156]; P08779 [119-127]		0	1335.69	1.129	19.81	Shared	100	K.VTMQNLNDR.L
FALSE	[R].VLDELTLTK.[A]	1xTMT6plex [K9]; 1xTMT6plex [N-Term]	0.00030973	1	1	7	P13645	P13645 [258-266]		0	1489.92	0.951	49.05		100	R.VLDELTLTK.A
FALSE	[R].SLLEGEGSSGGGGR.[G]	1xTMT6plex [N-Term]	0.00030973	1	1	10	P13645	P13645 [451-464]		0	1491.76	0.839	30.35		100	R.SLLEGEGSSGGGGR.G
FALSE	[K].QSLEASLAETEGR.[Y]	1xTMT6plex [N-Term]	0.00030973	1	1	11	P13645	P13645 [387-399]		0	1619.84	0.962	31.62		100	K.QSLEASLAETEGR.Y
FALSE	[R].QSVEADINGLR.[KR]	1xTMT6plex [N-Term]	0.00030973	2	3	12	P13645; P13646	P13645 [246-256]; P13646 [202-212]		0	1430.78	1.1	41.18	Shared	100	R.QSVEADINGLR.R
FALSE	[R].QSVEADINGLRR.[V]	1xTMT6plex [N-Term]	0.00030973	2	2	6	P13645; P13646	P13645 [246-257]; P13646 [202-213]		1	1586.88	0.878	17.38	Shared	100	R.QSVEADINGLRR.V
FALSE	[R].SQYEQLAEQNR.[K]	1xTMT6plex [N-Term]	0.00030973	1	1	8	P13645	P13645 [323-333]		0	1594.8	0.968	5.69		100	R.SQYEQLAEQNR.K
FALSE	[R].SQYEQLAEQNRK.[D]	1xTMT6plex [K12]; 1xTMT6plex [N-Term]	0.00030973	1	1	6	P13645	P13645 [323-334]		1	1952.06	1.323	6.23		100	R.SQYEQLAEQNRK.D
FALSE	[K].SSSSGSVGESSSK.[G]	1xTMT6plex [K13]; 1xTMT6plex [N-Term]	0.00030973	1	1	8	P13645	P13645 [568-580]		0	1643.85	1.228	26.35		100	K.SSSSGSVGESSSK.G
FALSE	[K].SSSSGSVGESSSKGPR.[Y]	1xTMT6plex [K13]; 1xTMT6plex [N-Term]	0.00030973	1	1	2	P13645	P13645 [568-583]		1	1954.02	2.576	126.2		100	K.SSSSGSVGESSSKGPR.Y
FALSE	[R].ALEESNYELEGK.[I]	1xTMT6plex [K12]; 1xTMT6plex [N-Term]	0.00030973	1	1	11	P13645	P13645 [166-177]		0	1839.97	0.945	35.93		100	R.ALEESNYELEGK.I
FALSE	[K].ELTTEIDNNIEQISSYK.[S]	1xTMT6plex [K17]; 1xTMT6plex [N-Term]	0.00030973	1	1	5	P13645	P13645 [346-362]		0	2455.3	1.084	27.4		100	K.ELTTEIDNNIEQISSYK.S
FALSE	[K].ADLEMQIESLTEELAYLK.[K]	1xOxidation [M5]; 1xTMT6plex [K18]; 1xTMT6plex [N-Term]	0.00030973	1	1	1	P13645	P13645 [267-284]		0	2570.37	1.143	26.71		100	K.ADLEMQIESLTEELAYLK.K
FALSE	[KR].DAEAWFNEK.[S]	1xTMT6plex [K9]; 1xTMT6plex [N-Term]	0.00030973	1	4	6	P13645	P13645 [335-343]		0	1567.82	1.004	45.13		100	K.DAEAWFNEK.S
FALSE	[K].GSLGGGFSSGGFSGGSFSR.[G]	1xTMT6plex [N-Term]	0.00030973	1	1	2	P13645	P13645 [41-59]		0	1936.94	1.138	7.96		100	K.GSLGGGFSSGGFSGGSFSR.G
FALSE	[R].AETECQNTEYQQLLDIK.[I]	1xCarbamidomethyl [C5]; 1xTMT6plex [K17]; 1xTMT6plex [N-Term]	0.00030973	1	1	3	P13645	P13645 [423-439]		0	2541.29	0.791	2.34		100	R.AETECQNTEYQQLLDIK.I
FALSE	[K].SEITELRR.[N]	1xTMT6plex [N-Term]	0.000568404	1	1	7	P13645	P13645 [363-370]		1	1232.72	0.914	26.58		100	K.SEITELRR.N
FALSE	[R].LKYENEVALR.[Q]	1xTMT6plex [K2]; 1xTMT6plex [N-Term]	0.000568404	1	1	1	P13645	P13645 [236-245]		1	1693	0.883	24.93		100	R.LKYENEVALR.Q
FALSE	[K].YENEVALR.[Q]	1xTMT6plex [N-Term]	0.000568404	1	1	7	P13645	P13645 [238-245]		0	1222.66	0.939	27.97		100	K.YENEVALR.Q
FALSE	[K].NHEEEMK.[ANDE]	1xTMT6plex [K7]; 1xTMT6plex [N-Term]	0.000568404	2	6	1	P13645; P13646	P13645 [286-292]; P13646 [242-248]		0	1374.71			No Quan Values		K.NHEEEMK.D
FALSE	[KR].LAADDFR.[AITLV]	1xTMT6plex [N-Term]	0.00164966	6	17	7	P02533; P13645; P05783; P13646; Q04695; P08779	P02533 [195-201]; P13645 [229-235]; P05783 [159-165]; P13646 [185-191]; Q04695 [164-170]; P08779 [197-203]		0	1036.56	0.888	46.72	Shared	100	R.LAADDFR.L
FALSE	[K].SEITELR.[R]	1xTMT6plex [N-Term]	0.00164966	1	1	5	P13645	P13645 [363-369]		0	1076.61	1.024	50.52		100	K.SEITELR.R
FALSE	[R].LASYLDK.[V]	1xTMT6plex [K7]; 1xTMT6plex [N-Term]	0.00237856	6	8	5	P02533; P13645; Q99456; Q04695; P35527; P08779	P02533 [126-132]; P13645 [157-163]; Q99456 [136-142]; Q04695 [95-101]; P35527 [164-170]; P08779 [128-134]		0	1267.77	0.865	50.57	Shared	100	R.LASYLDK.V
FALSE	[K].HGNSHQGEPR.[D]	1xTMT6plex [N-Term]	0.00380261	1	1	1	P13645	P13645 [185-194]		0	1347.67	1.046	36.15		100	K.HGNSHQGEPR.D
High	P02751	Fibronectin OS=Homo sapiens OX=9606 GN=FN1 PE=1 SV=4	241.771	23	41	89	41	2386	262.5	5.71	296.74	41	2335	FN1	8064.6	8764.7	6890.8	9438.3	9794.9	7842.9
Checked	Annotated Sequence	Modifications	Qvality q-value	# Protein Groups	# Proteins	# PSMs	Master Protein Accessions	Positions in Master Proteins	Modifications in Master Proteins	# Missed Cleavages	Theo. MH+ [Da]	Abundance Ratio: (HO) / (WT)	Abundances (Grouped) CV [%]: HO	Quan Info	Channel Occupancy [%]	Sequence in Protein
FALSE	[K].IYLYTLNDNAR.[S]	1xTMT6plex [N-Term]	0.00030973	1	1	2	P02751	P02751 [1881-1891]		0	1584.86	0.837	23.67		100	K.IYLYTLNDNAR.S
FALSE	[R].ISCTIANR.[C]	1xCarbamidomethyl [C3]; 1xTMT6plex [N-Term]	0.00030973	1	1	1	P02751	P02751 [133-140]		0	1163.64	0.812	28.61		100	R.ISCTIANR.C
FALSE	[R].ITYGETGGNSPVQEFTVPGSK.[S]	1xTMT6plex [K21]; 1xTMT6plex [N-Term]	0.00030973	1	1	3	P02751	P02751 [1480-1500]		0	2626.38	0.991	17.04		100	R.ITYGETGGNSPVQEFTVPGSK.S
FALSE	[R].NLQPASEYTVSLVAIK.[G]	1xTMT6plex [K16]; 1xTMT6plex [N-Term]	0.00030973	1	1	3	P02751	P02751 [1055-1070]		0	2191.27	0.885	30.21		100	R.NLQPASEYTVSLVAIK.G
FALSE	[R].NTFAEVTGLSPGVTYYFK.[V]	1xTMT6plex [K18]; 1xTMT6plex [N-Term]	0.00030973	1	1	1	P02751	P02751 [959-976]		0	2452.32	0.973	35.15		100	R.NTFAEVTGLSPGVTYYFK.V
FALSE	[K].IAWESPQGQVSR.[Y]	1xTMT6plex [N-Term]	0.00030973	1	1	1	P02751	P02751 [1650-1661]		0	1586.85	0.752	31.96		100	K.IAWESPQGQVSR.Y
FALSE	[R].VDVIPVNLPGEHGQR.[L]	1xTMT6plex [N-Term]	0.00030973	1	1	4	P02751	P02751 [939-953]		0	1859.03	0.911	5.92		100	R.VDVIPVNLPGEHGQR.L
FALSE	[R].TNTNVNCPIECFMPLDVQADR.[E]	2xCarbamidomethyl [C7; C11]; 1xTMT6plex [N-Term]	0.00030973	1	1	1	P02751	P02751 [2361-2381]		0	2723.28	0.851	7.34		100	R.TNTNVNCPIECFMPLDVQADR.E
FALSE	[R].TNTNVNCPIECFMPLDVQADREDSRE.[-]	2xCarbamidomethyl [C7; C11]; 1xTMT6plex [N-Term]	0.00030973	1	1	2	P02751	P02751 [2361-2386]		2	3339.52	0.825	31.2		100	R.TNTNVNCPIECFMPLDVQADREDSRE.-
FALSE	[K].WLPSSSPVTGYR.[V]	1xTMT6plex [N-Term]	0.00030973	1	1	1	P02751	P02751 [1562-1573]		0	1578.85	0.843	19.55		100	K.WLPSSSPVTGYR.V
FALSE	[K].WCGTTQNYDADQK.[F]	1xCarbamidomethyl [C2]; 1xTMT6plex [K13]; 1xTMT6plex [N-Term]	0.00030973	1	1	2	P02751	P02751 [445-457]		0	2044.98	1.063	17.17		100	K.WCGTTQNYDADQK.F
FALSE	[R].VTWAPPPSIDLTNFLVR.[Y]	1xTMT6plex [N-Term]	0.00030973	1	1	2	P02751	P02751 [1285-1301]		0	2155.21	0.989	8.33		100	R.VTWAPPPSIDLTNFLVR.Y
FALSE	[K].YEVSVYALK.[D]	1xTMT6plex [K9]; 1xTMT6plex [N-Term]	0.00030973	1	1	3	P02751	P02751 [1788-1796]		0	1529.9	0.822	41.73		100	K.YEVSVYALK.D
FALSE	[R].VPGTSTSATLTGLTR.[G]	1xTMT6plex [N-Term]	0.00030973	1	1	2	P02751	P02751 [2150-2164]		0	1690.95	0.976	15.1		100	R.VPGTSTSATLTGLTR.G
FALSE	[R].RPGGEPSPEGTTGQSYNQYSQR.[Y]	1xTMT6plex [N-Term]	0.00030973	1	1	3	P02751	P02751 [2335-2356]		0	2625.25			No Quan Values		R.RPGGEPSPEGTTGQSYNQYSQR.Y
FALSE	[R].QYNVGPSVSK.[Y]	1xTMT6plex [K10]; 1xTMT6plex [N-Term]	0.00030973	1	1	3	P02751	P02751 [1041-1050]		0	1536.88	0.846	28.84		100	R.QYNVGPSVSK.Y
FALSE	[R].STTPDITGYR.[I]	1xTMT6plex [N-Term]	0.00030973	1	1	2	P02751	P02751 [1198-1207]		0	1339.71	0.992	38.3		100	R.STTPDITGYR.I
FALSE	[R].SYTITGLQPGTDYK.[I]	1xTMT6plex [K14]; 1xTMT6plex [N-Term]	0.00030973	1	1	2	P02751	P02751 [1867-1880]		0	2002.09	0.927	51.76		100	R.SYTITGLQPGTDYK.I
FALSE	[R].TFYSCTTEGR.[Q]	1xCarbamidomethyl [C5]; 1xTMT6plex [N-Term]	0.00030973	1	1	2	P02751	P02751 [370-379]		0	1450.68	0.825	26.07		100	R.TFYSCTTEGR.Q
FALSE	[K].TETITGFQVDAVPANGQTPIQR.[T]	1xTMT6plex [N-Term]	0.00030973	1	1	4	P02751	P02751 [1838-1859]		0	2572.36	0.961	41.73		100	K.TETITGFQVDAVPANGQTPIQR.T
FALSE	[R].SSPVVIDASTAIDAPSNLR.[F]	1xTMT6plex [N-Term]	0.00030973	1	1	2	P02751	P02751 [1892-1910]		0	2142.16	0.931	48.67		100	R.SSPVVIDASTAIDAPSNLR.F
FALSE	[K].DTLTSRPAQGVVTTLENVSPPR.[R]	1xTMT6plex [N-Term]	0.00030973	1	1	1	P02751	P02751 [1797-1818]		0	2567.4	0.832	34.58		100	K.DTLTSRPAQGVVTTLENVSPPR.R
FALSE	[R].FLATTPNSLLVSWQPPR.[A]	1xTMT6plex [N-Term]	0.00030973	1	1	1	P02751	P02751 [1911-1927]		0	2156.21	1.078	37.3		100	R.FLATTPNSLLVSWQPPR.A
FALSE	[K].ESVPISDTIIPAVPPPTDLR.[F]	1xTMT6plex [N-Term]	0.00030973	1	1	1	P02751	P02751 [1255-1274]		0	2346.31	1.033	22.5		100	K.ESVPISDTIIPAVPPPTDLR.F
FALSE	[K].EINLAPDSSSVVVSGLMVATK.[Y]	1xTMT6plex [K21]; 1xTMT6plex [N-Term]	0.00030973	1	1	1	P02751	P02751 [1767-1787]		0	2575.44	1.155	24.96		100	K.EINLAPDSSSVVVSGLMVATK.Y
FALSE	[R].EESPLLIGQQSTVSDVPR.[D]	1xTMT6plex [N-Term]	0.00030973	1	1	6	P02751	P02751 [1435-1452]		0	2184.17	1.014	4.6		100	R.EESPLLIGQQSTVSDVPR.D
FALSE	[K].GLAFTDVDVDSIK.[I]	1xTMT6plex [K13]; 1xTMT6plex [N-Term]	0.00030973	1	1	3	P02751	P02751 [1637-1649]		0	1838.03	0.879	10.88		100	K.GLAFTDVDVDSIK.I
FALSE	[R].FTNIGPDTMR.[V]	1xTMT6plex [N-Term]	0.00030973	1	1	3	P02751	P02751 [1275-1284]		0	1380.71	0.981	39.31		100	R.FTNIGPDTMR.V
FALSE	[R].GFNCESKPEAEETCFDK.[Y]	2xCarbamidomethyl [C4; C14]; 2xTMT6plex [K7; K17]; 1xTMT6plex [N-Term]	0.00030973	1	1	3	P02751	P02751 [84-100]		0	2735.33	0.86	34.28		100	R.GFNCESKPEAEETCFDK.Y
FALSE	[R].DLQFVEVTDVK.[V]	1xTMT6plex [K11]; 1xTMT6plex [N-Term]	0.00030973	1	1	3	P02751	P02751 [912-922]		0	1751	1.106	9.56		100	R.DLQFVEVTDVK.V
FALSE	[R].DAPIVNK.[V]	1xTMT6plex [K7]; 1xTMT6plex [N-Term]	0.000568404	1	1	2	P02751	P02751 [1163-1169]		0	1214.75	0.867	31.95		100	R.DAPIVNK.V
FALSE	[R].LTVGLTR.[R]	1xTMT6plex [N-Term]	0.000568404	1	1	2	P02751	P02751 [1029-1035]		0	988.635	0.808	23.16		100	R.LTVGLTR.R
FALSE	[R].TTPPTTATPIR.[H]	1xTMT6plex [N-Term]	0.000568404	1	1	3	P02751	P02751 [2060-2070]		0	1384.8	0.8	24.14		100	R.TTPPTTATPIR.H
FALSE	[K].LGVRPSQGGEAPR.[E]	1xTMT6plex [N-Term]	0.00139174	1	1	1	P02751	P02751 [1117-1129]		0	1552.88	0.907	31.86		100	K.LGVRPSQGGEAPR.E
FALSE	[K].GNQESPK.[A]	1xTMT6plex [K7]; 1xTMT6plex [N-Term]	0.00237856	1	1	3	P02751	P02751 [1071-1077]		0	1217.69	0.853	33.2		100	K.GNQESPK.A
FALSE	[K].YTGNTYR.[V]	1xTMT6plex [N-Term]	0.00283146	1	1	1	P02751	P02751 [101-107]		0	1103.57	0.699	28.72		100	K.YTGNTYR.V
FALSE	[R].IGDQWDK.[Q]	1xTMT6plex [K7]; 1xTMT6plex [N-Term]	0.00380261	1	1	1	P02751	P02751 [480-486]		0	1319.74	0.851	29.84		100	R.IGDQWDK.Q
FALSE	[K].HYQINQQWER.[T]	1xTMT6plex [N-Term]	0.00550176	1	1	1	P02751	P02751 [58-67]		0	1630.83	0.885	19.59		100	K.HYQINQQWER.T
FALSE	[K].VFAVSHGR.[E]	1xTMT6plex [N-Term]	0.00573188	1	1	1	P02751	P02751 [977-984]		0	1101.64	1.038	15.56		100	K.VFAVSHGR.E
FALSE	[K].SEPLIGR.[K]	1xTMT6plex [N-Term]	0.00616547	1	1	4	P02751	P02751 [1982-1988]		0	1000.6	0.952	11.25		100	K.SEPLIGR.K
FALSE	[R].MSESGFK.[L]	1xTMT6plex [K7]; 1xTMT6plex [N-Term]	0.00903197	1	1	1	P02751	P02751 [2224-2230]		0	1243.68	0.904	7.53		100	R.MSESGFK.L
FALSE	[R].FTNIGPDTMR.[V]	1xOxidation [M9]; 1xTMT6plex [N-Term]	0.00966706	1	1	1	P02751	P02751 [1275-1284]		0	1396.71	0.942	33.71		100	R.FTNIGPDTMR.V
High	P35908	Keratin, type II cytoskeletal 2 epidermal OS=Homo sapiens OX=9606 GN=KRT2 PE=1 SV=2	230.327	54	32	137	23	639	65.4	8	449.02	32	3849	KRT2	10786	11075.8	12036.4	9665.5	11527.2	10642.1
Checked	Annotated Sequence	Modifications	Qvality q-value	# Protein Groups	# Proteins	# PSMs	Master Protein Accessions	Positions in Master Proteins	Modifications in Master Proteins	# Missed Cleavages	Theo. MH+ [Da]	Abundance Ratio: (HO) / (WT)	Abundances (Grouped) CV [%]: HO	Quan Info	Channel Occupancy [%]	Sequence in Protein
FALSE	[R].NLDLDSIIAEVK.[A]	1xTMT6plex [K12]; 1xTMT6plex [N-Term]	0.00030973	4	7	7	P35908; P04259; P02538; P13647	P35908 [342-353]; P04259 [327-338]; P02538 [327-338]; P13647 [332-343]		0	1788.05	1.065	49.27	Shared	100	R.NLDLDSIIAEVK.A
FALSE	[K].NVQDAIADAEQR.[G]	1xTMT6plex [N-Term]	0.00030973	1	1	4	P35908	P35908 [419-430]		0	1558.8	0.978	23.37		100	K.NVQDAIADAEQR.G
FALSE	[K].IEISELNR.[V]	1xTMT6plex [N-Term]	0.00030973	2	2	5	P35908; P04264	P35908 [394-401]; P04264 [396-403]		0	1202.69	0.787	39.14	Shared	100	K.IEISELNR.V
FALSE	[K].KYEDEINK.[R]	2xTMT6plex [K1; K8]; 1xTMT6plex [N-Term]	0.00030973	2	3	2	P35908; P12035	P35908 [267-274]; P12035 [289-296]		1	1726	0.978	17.68	Shared	100	K.KYEDEINK.R
FALSE	[K].LNDLEEALQQAK.[E]	1xTMT6plex [K12]; 1xTMT6plex [N-Term]	0.00030973	1	1	6	P35908	P35908 [442-453]		0	1830.04	0.941	20.8		100	K.LNDLEEALQQAK.E
FALSE	[R].LQGEIAHVK.[K]	1xTMT6plex [K9]; 1xTMT6plex [N-Term]	0.00030973	1	1	4	P35908	P35908 [406-414]		0	1452.89	0.911	24.88		100	R.LQGEIAHVK.K
FALSE	[K].VDLLNQEIEFLK.[V]	1xTMT6plex [K12]; 1xTMT6plex [N-Term]	0.00030973	1	1	6	P35908	P35908 [303-314]		0	1919.13	0.952	24.62		100	K.VDLLNQEIEFLK.V
FALSE	[K].VDPEIQNVK.[A]	1xTMT6plex [K9]; 1xTMT6plex [N-Term]	0.00030973	1	1	5	P35908	P35908 [167-175]		0	1499.88	0.938	19.08		100	K.VDPEIQNVK.A
FALSE	[R].TSQNSELNNMQDLVEDYKK.[K]	1xOxidation [M10]; 2xTMT6plex [K18; K19]; 1xTMT6plex [N-Term]	0.00030973	1	1	1	P35908	P35908 [248-266]		1	2959.53	0.714	23.31		100	R.TSQNSELNNMQDLVEDYKK.K
FALSE	[R].TSQNSELNNMQDLVEDYKK.[K]	2xTMT6plex [K18; K19]; 1xTMT6plex [N-Term]	0.00030973	1	1	1	P35908	P35908 [248-266]		1	2943.53	0.963	5.07		100	R.TSQNSELNNMQDLVEDYKK.K
FALSE	[R].TSQNSELNNMQDLVEDYK.[K]	1xTMT6plex [K18]; 1xTMT6plex [N-Term]	0.00030973	1	1	3	P35908	P35908 [248-265]		0	2586.28	0.986	0.26		100	R.TSQNSELNNMQDLVEDYK.K
FALSE	[R].TSQNSELNNMQDLVEDYK.[K]	1xOxidation [M10]; 1xTMT6plex [K18]; 1xTMT6plex [N-Term]	0.00030973	1	1	4	P35908	P35908 [248-265]		0	2602.27	0.834	18.66		100	R.TSQNSELNNMQDLVEDYK.K
FALSE	[KR].YEDEINK.[HR]	1xTMT6plex [K7]; 1xTMT6plex [N-Term]	0.00030973	7	12	7	P35908; P04264; P04259; P02538; P12035; P05787; P13647	P35908 [268-274]; P04264 [270-276]; P04259 [253-259]; P02538 [253-259]; P12035 [290-296]; P05787 [179-185]; P13647 [258-264]		0	1368.74	0.882	62.49	Shared	100	K.YEDEINK.R
FALSE	[K].YEELQVTVGR.[H]	1xTMT6plex [N-Term]	0.00030973	1	1	6	P35908	P35908 [375-384]		0	1422.78	0.926	5.24		100	K.YEELQVTVGR.H
FALSE	[R].YGSGGGSK.[G]	1xTMT6plex [K8]; 1xTMT6plex [N-Term]	0.00030973	1	1	1	P35908	P35908 [573-580]		0	1170.65	1.085	18.64		100	R.YGSGGGSK.G
FALSE	[R].YLDGLTAER.[T]	1xTMT6plex [N-Term]	0.00030973	1	1	3	P35908	P35908 [239-247]		0	1266.69	0.932	3.49		100	R.YLDGLTAER.T
FALSE	[R].TAAENDFVTLK.[K]	1xTMT6plex [K11]; 1xTMT6plex [N-Term]	0.00030973	1	1	7	P35908	P35908 [276-286]		0	1666.94	0.868	18.28		100	R.TAAENDFVTLK.K
FALSE	[R].TAAENDFVTLKK.[D]	2xTMT6plex [K11; K12]; 1xTMT6plex [N-Term]	0.00030973	1	1	3	P35908	P35908 [276-287]		1	2024.2	0.897	13.84		100	R.TAAENDFVTLKK.D
FALSE	[R].SLVGLGGTK.[S]	1xTMT6plex [K9]; 1xTMT6plex [N-Term]	0.00030973	1	1	2	P35908	P35908 [62-70]		0	1289.82	1.071	14.78		100	R.SLVGLGGTK.S
FALSE	[K].DVDNAYMIK.[V]	1xTMT6plex [K9]; 1xTMT6plex [N-Term]	0.00030973	1	1	1	P35908	P35908 [288-296]		0	1526.83	1.069	7.86		100	K.DVDNAYMIK.V
FALSE	[R].DYQELMNVK.[L]	1xTMT6plex [K9]; 1xTMT6plex [N-Term]	0.00030973	2	4	2	P35908; P12035	P35908 [462-470]; P12035 [484-492]		0	1597.87	0.987	8.32	Shared	100	R.DYQELMNVK.L
FALSE	[R].FLEQQNQVLQTK.[W]	1xTMT6plex [K12]; 1xTMT6plex [N-Term]	0.00030973	2	3	10	P35908; P04264	P35908 [198-209]; P04264 [200-211]		0	1934.11	0.866	47.62	Shared	100	R.FLEQQNQVLQTK.W
FALSE	[K].EEAEALYHSK.[Y]	1xTMT6plex [K10]; 1xTMT6plex [N-Term]	0.00030973	1	1	2	P35908	P35908 [365-374]		0	1634.88	0.925	6.89		100	K.EEAEALYHSK.Y
FALSE	[KR].AQYEEIAQR.[S]	1xTMT6plex [N-Term]	0.00030973	4	6	6	P35908; P04259; P02538; P19013	P35908 [354-362]; P04259 [339-347]; P02538 [339-347]; P19013 [327-335]		0	1336.71	0.984	48.1	Shared	100	K.AQYEEIAQR.S
FALSE	[R].GGSGGGGSISGGGYGSGGGSGGR.[Y]	1xTMT6plex [N-Term]	0.00030973	1	1	5	P35908	P35908 [550-572]		0	1970.91	1.137	14.96		100	R.GGSGGGGSISGGGYGSGGGSGGR.Y
FALSE	[K].GGSISGGGYGSGGGK.[H]	1xTMT6plex [K15]; 1xTMT6plex [N-Term]	0.00030973	1	1	3	P35908	P35908 [581-595]		0	1655.88	1.021	5.33		100	K.GGSISGGGYGSGGGK.H
FALSE	[R].GGSSSGGGYGSGGGGSSSVK.[G]	1xTMT6plex [K20]; 1xTMT6plex [N-Term]	0.00030973	1	1	2	P35908	P35908 [604-623]		0	2047.01	0.847	21.77		100	R.GGSSSGGGYGSGGGGSSSVK.G
FALSE	[R].GGGFGGGSSFGGGSGFSGGGFGGGGFGGGR.[F]	1xTMT6plex [N-Term]	0.00030973	1	1	2	P35908	P35908 [93-122]		0	2628.18	1.019	28.74		100	R.GGGFGGGSSFGGGSGFSGGGFGGGGFGGGR.F
FALSE	[R].GSSSGGGYSSGSSSYGSGGR.[Q]	1xTMT6plex [N-Term]	0.00030973	1	1	4	P35908	P35908 [525-544]		0	1969.87	1.006	46.19		100	R.GSSSGGGYSSGSSSYGSGGR.Q
FALSE	[K].AAFGGSGGR.[G]	1xTMT6plex [N-Term]	0.00030973	1	1	4	P35908	P35908 [516-524]		0	1008.54	1.03	7.99		100	K.AAFGGSGGR.G
FALSE	[R].GFSSGSAVVSGGSR.[R]	1xTMT6plex [N-Term]	0.00030973	1	1	6	P35908	P35908 [21-34]		0	1483.77	1.015	20.13		100	R.GFSSGSAVVSGGSR.R
FALSE	[K].DVDNAYMIK.[V]	1xOxidation [M7]; 1xTMT6plex [K9]; 1xTMT6plex [N-Term]	0.000568404	1	1	3	P35908	P35908 [288-296]		0	1542.82	0.759	33.65		100	K.DVDNAYMIK.V
FALSE	[R].DYQELMNVK.[L]	1xOxidation [M6]; 1xTMT6plex [K9]; 1xTMT6plex [N-Term]	0.000568404	2	4	3	P35908; P12035	P35908 [462-470]; P12035 [484-492]		0	1613.86	0.771	19.65	Shared	100	R.DYQELMNVK.L
FALSE	[KR].YEDEINKR.[T]	1xTMT6plex [K7]; 1xTMT6plex [N-Term]	0.000568404	7	11	4	P35908; P04264; P04259; P02538; P12035; P05787; P13647	P35908 [268-275]; P04264 [270-277]; P04259 [253-260]; P02538 [253-260]; P12035 [290-297]; P05787 [179-186]; P13647 [258-265]		1	1524.84	0.85	50.12	Shared	100	K.YEDEINKR.T
FALSE	[K].FASFIDK.[V]	1xTMT6plex [K7]; 1xTMT6plex [N-Term]	0.00139174	8	18	2	Q86Y46; P35908; P04259; P02538; P12035; P19013; P05787; P13647	Q86Y46 [143-149]; P35908 [189-195]; P04259 [174-180]; P02538 [174-180]; P12035 [209-215]; P19013 [162-168]; P05787 [102-108]; P13647 [179-185]		0	1285.76	1.076	55.1	Shared	100	K.FASFIDK.V
FALSE	[R].HGDSLK.[EK]	1xTMT6plex [K6]; 1xTMT6plex [N-Term]	0.00258338	1	2	1	P35908	P35908 [385-390]		0	1114.66			No Quan Values		R.HGDSLK.E
High	P02452	Collagen alpha-1(I) chain OS=Homo sapiens OX=9606 GN=COL1A1 PE=1 SV=5	218.886	39	39	71	39	1464	138.9	5.8	237.78	39	1277	COL1A1	3421.1	3968.7	2921	4006.9	4597.2	3426.1
Checked	Annotated Sequence	Modifications	Qvality q-value	# Protein Groups	# Proteins	# PSMs	Master Protein Accessions	Positions in Master Proteins	Modifications in Master Proteins	# Missed Cleavages	Theo. MH+ [Da]	Abundance Ratio: (HO) / (WT)	Abundances (Grouped) CV [%]: HO	Quan Info	Channel Occupancy [%]	Sequence in Protein
FALSE	[R].ICVCDNGK.[V]	2xCarbamidomethyl [C2; C4]; 1xTMT6plex [K8]; 1xTMT6plex [N-Term]	0.00030973	1	1	2	P02452	P02452 [60-67]		0	1423.74	0.821	31.36		100	R.ICVCDNGK.V
FALSE	[K].VLCDDVICDETK.[N]	2xCarbamidomethyl [C3; C8]; 1xTMT6plex [K12]; 1xTMT6plex [N-Term]	0.00030973	1	1	4	P02452	P02452 [68-79]		0	1924.98	0.818	29.04		100	K.VLCDDVICDETK.N
FALSE	[R].VGPPGPSGNAGPPGPPGPAGK.[E]	1xTMT6plex [K21]; 1xTMT6plex [N-Term]	0.00030973	1	1	1	P02452	P02452 [883-903]		0	2223.23	0.83	41.3		100	R.VGPPGPSGNAGPPGPPGPAGK.E
FALSE	[K].TGPPGPAGQDGRPGPPGPPGAR.[G]	1xTMT6plex [N-Term]	0.00030973	1	1	2	P02452	P02452 [553-574]		0	2222.16	0.878	19.8		100	K.TGPPGPAGQDGRPGPPGPPGAR.G
FALSE	[K].SLSQQIENIR.[S]	1xTMT6plex [N-Term]	0.00030973	1	1	1	P02452	P02452 [1237-1246]		0	1416.8	0.834	11.74		100	K.SLSQQIENIR.S
FALSE	[K].STGGISVPGPMGPSGPR.[G]	1xTMT6plex [N-Term]	0.00030973	1	1	3	P02452	P02452 [171-187]		0	1782.94	0.752	22.85		100	K.STGGISVPGPMGPSGPR.G
FALSE	[R].DRDLEVDTTLK.[S]	1xTMT6plex [K11]; 1xTMT6plex [N-Term]	0.00030973	1	1	2	P02452	P02452 [1226-1236]		1	1763	0.931	13.53		100	R.DRDLEVDTTLK.S
FALSE	[R].GLTGPIGPPGPAGAPGDK.[G]	1xTMT6plex [K18]; 1xTMT6plex [N-Term]	0.00030973	1	1	1	P02452	P02452 [764-781]		0	2017.15	0.879	18.6		100	R.GLTGPIGPPGPAGAPGDK.G
FALSE	[K].DGEAGAQGPPGPAGPAGER.[G]	1xTMT6plex [N-Term]	0.00030973	1	1	3	P02452	P02452 [613-631]		0	1919.94	0.95	14.93		100	K.DGEAGAQGPPGPAGPAGER.G
FALSE	[K].GNSGEPGAPGSK.[G]	1xTMT6plex [K12]; 1xTMT6plex [N-Term]	0.00030973	1	1	1	P02452	P02452 [431-442]		0	1515.82	0.697	37.52		100	K.GNSGEPGAPGSK.G
FALSE	[R].GVPGPPGAVGPAGK.[D]	1xTMT6plex [K14]; 1xTMT6plex [N-Term]	0.00030973	1	1	3	P02452	P02452 [599-612]		0	1618.97	0.811	24.36		100	R.GVPGPPGAVGPAGK.D
FALSE	[R].GVQGPPGPAGPR.[G]	1xTMT6plex [N-Term]	0.00030973	1	1	4	P02452	P02452 [686-697]		0	1318.74	0.856	26.15		100	R.GVQGPPGPAGPR.G
FALSE	[R].GPPGPMGPPGLAGPPGESGR.[E]	1xOxidation [M6]; 1xTMT6plex [N-Term]	0.00030973	1	1	2	P02452	P02452 [995-1014]		0	2030.03	0.83	4.47		100	R.GPPGPMGPPGLAGPPGESGR.E
FALSE	[R].GPPGSAGAPGK.[D]	1xTMT6plex [K11]; 1xTMT6plex [N-Term]	0.00030973	1	1	3	P02452	P02452 [1142-1152]		0	1353.79	0.845	31.03		100	R.GPPGSAGAPGK.D
FALSE	[R].GPSGPQGPGGPPGPK.[G]	1xTMT6plex [K15]; 1xTMT6plex [N-Term]	0.00030973	1	1	1	P02452	P02452 [416-430]		0	1744.97	0.78	13.43		100	R.GPSGPQGPGGPPGPK.G
FALSE	[R].GRPGAPGPAGAR.[G]	1xTMT6plex [N-Term]	0.00030973	1	1	1	P02452	P02452 [311-322]		0	1292.74	0.987	27.09		100	R.GRPGAPGPAGAR.G
FALSE	[R].GSAGPPGATGFPGAAGR.[V]	1xTMT6plex [N-Term]	0.00030973	1	1	3	P02452	P02452 [866-882]		0	1656.87	0.838	26.82		100	R.GSAGPPGATGFPGAAGR.V
FALSE	[K].GDAGPAGPK.[G]	1xTMT6plex [K9]; 1xTMT6plex [N-Term]	0.00030973	1	1	1	P02452	P02452 [278-286]		0	1227.71	0.894	44.09		100	K.GDAGPAGPK.G
FALSE	[K].GDAGAPGAPGSQGAPGLQGMPGER.[G]	1xTMT6plex [N-Term]	0.00030973	1	1	1	P02452	P02452 [710-733]		0	2364.16	0.894	14.95		100	K.GDAGAPGAPGSQGAPGLQGMPGER.G
FALSE	[K].GDRGETGPAGPPGAPGAPGAPGPVGPAGK.[S]	1xTMT6plex [K29]; 1xTMT6plex [N-Term]	0.00030973	1	1	2	P02452	P02452 [1034-1062]		1	2907.55	1.064	28.28		100	K.GDRGETGPAGPPGAPGAPGAPGPVGPAGK.S
FALSE	[R].GANGAPGNDGAK.[G]	1xTMT6plex [K12]; 1xTMT6plex [N-Term]	0.00030973	1	1	1	P02452	P02452 [698-709]		0	1486.8	0.893	19.78		100	R.GANGAPGNDGAK.G
FALSE	[K].GANGAPGIAGAPGFPGAR.[G]	1xTMT6plex [N-Term]	0.00030973	1	1	2	P02452	P02452 [398-415]		0	1766.95	0.877	0		100	K.GANGAPGIAGAPGFPGAR.G
FALSE	[R].GETGPAGRPGEVGPPGPPGPAGEK.[G]	1xTMT6plex [K24]; 1xTMT6plex [N-Term]	0.00030973	1	1	1	P02452	P02452 [911-934]		0	2626.4	0.842	47.87		100	R.GETGPAGRPGEVGPPGPPGPAGEK.G
FALSE	[R].GETGPAGPPGAPGAPGAPGPVGPAGK.[S]	1xTMT6plex [K26]; 1xTMT6plex [N-Term]	0.00030973	1	1	1	P02452	P02452 [1037-1062]		0	2579.4	0.739	26.9		100	R.GETGPAGPPGAPGAPGAPGPVGPAGK.S
FALSE	[K].GESGPSGPAGPTGAR.[G]	1xTMT6plex [N-Term]	0.00030973	1	1	4	P02452	P02452 [782-796]		0	1526.78	0.844	22.84		100	K.GESGPSGPAGPTGAR.G
FALSE	[R].GFSGLQGPPGPPGSPGEQGPSGASGPAGPR.[G]	1xTMT6plex [N-Term]	0.00030973	1	1	2	P02452	P02452 [1112-1141]		0	2886.43			No Quan Values		R.GFSGLQGPPGPPGSPGEQGPSGASGPAGPR.G
FALSE	[R].GFSGLDGAK.[G]	1xTMT6plex [K9]; 1xTMT6plex [N-Term]	0.00030973	1	1	1	P02452	P02452 [269-277]		0	1309.75	0.885	10.17		100	R.GFSGLDGAK.G
FALSE	[R].GFPGLPGPSGEPGK.[Q]	1xTMT6plex [K14]; 1xTMT6plex [N-Term]	0.00030973	1	2	3	P02452	P02452 [971-984]		0	1754.98	0.997	7.73		100	R.GFPGLPGPSGEPGK.Q
FALSE	[R].GFPGADGVAGPK.[G]	1xTMT6plex [K12]; 1xTMT6plex [N-Term]	0.00030973	1	1	2	P02452	P02452 [494-505]		0	1530.87	0.838	21.46		100	R.GFPGADGVAGPK.G
FALSE	[K].GEPGPVGVQGPPGPAGEEGKR.[G]	1xTMT6plex [K20]; 1xTMT6plex [N-Term]	0.00030973	1	1	1	P02452	P02452 [449-469]		1	2430.31	0.809	30.86		100	K.GEPGPVGVQGPPGPAGEEGKR.G
FALSE	[K].GEPGPVGVQGPPGPAGEEGK.[R]	1xTMT6plex [K20]; 1xTMT6plex [N-Term]	0.00030973	1	1	2	P02452	P02452 [449-468]		0	2274.21	0.915	16.02		100	K.GEPGPVGVQGPPGPAGEEGK.R
FALSE	[K].QGPSGASGER.[G]	1xTMT6plex [N-Term]	0.000568404	1	1	2	P02452	P02452 [985-994]		0	1174.6	1.108	4.02		100	K.QGPSGASGER.G
FALSE	[R].GAAGLPGPK.[G]	1xTMT6plex [K9]; 1xTMT6plex [N-Term]	0.000568404	1	1	1	P02452	P02452 [734-742]		0	1225.77	0.701	20.72		100	R.GAAGLPGPK.G
FALSE	[R].GEPGPPGPAGFAGPPGADGQPGAK.[G]	1xTMT6plex [K24]; 1xTMT6plex [N-Term]	0.000568404	1	1	1	P02452	P02452 [803-826]		0	2544.32	0.97	27.5		100	R.GEPGPPGPAGFAGPPGADGQPGAK.G
FALSE	[K].NSVAYMDQQTGNLK.[K]	1xTMT6plex [K14]; 1xTMT6plex [N-Term]	0.000568404	1	1	1	P02452	P02452 [1372-1385]		0	2027.06			No Quan Values		K.NSVAYMDQQTGNLK.K
FALSE	[K].GADGSPGK.[D]	1xTMT6plex [K8]; 1xTMT6plex [N-Term]	0.00115152	1	1	2	P02452	P02452 [752-759]		0	1146.65	0.777	33.18		100	K.GADGSPGK.D
FALSE	[R].GVVGLPGQR.[G]	1xTMT6plex [N-Term]	0.00139174	1	1	1	P02452	P02452 [959-967]		0	1111.68	0.793	27.46		100	R.GVVGLPGQR.G
FALSE	[K].GEPGSPGENGAPGQMGPR.[G]	1xTMT6plex [N-Term]	0.00380261	1	1	1	P02452	P02452 [287-304]		0	1923.92	1.336	42.33		100	K.GEPGSPGENGAPGQMGPR.G
FALSE	[K].GEPGDAGAK.[G]	1xTMT6plex [K9]; 1xTMT6plex [N-Term]	0.00428502	1	1	1	P02452	P02452 [827-835]		0	1259.7	0.84	7.99		100	K.GEPGDAGAK.G
High	P35527	Keratin, type I cytoskeletal 9 OS=Homo sapiens OX=9606 GN=KRT9 PE=1 SV=3	215.81	47	24	164	23	623	62	5.24	534.15	24	3857	KRT9	14919.2	17688.6	18964.3	11736.9	14930.1	20956.8
Checked	Annotated Sequence	Modifications	Qvality q-value	# Protein Groups	# Proteins	# PSMs	Master Protein Accessions	Positions in Master Proteins	Modifications in Master Proteins	# Missed Cleavages	Theo. MH+ [Da]	Abundance Ratio: (HO) / (WT)	Abundances (Grouped) CV [%]: HO	Quan Info	Channel Occupancy [%]	Sequence in Protein
FALSE	[R].QEYEQLIAK.[N]	1xTMT6plex [K9]; 1xTMT6plex [N-Term]	0.00030973	1	1	7	P35527	P35527 [328-336]		0	1579.91	0.887	39.33		100	R.QEYEQLIAK.N
FALSE	[R].QFSSSYLSR.[S]	1xTMT6plex [N-Term]	0.00030973	1	1	4	P35527	P35527 [5-13]		0	1303.68	0.84	8.54		100	R.QFSSSYLSR.S
FALSE	[R].QGVDADINGLR.[Q]	1xTMT6plex [N-Term]	0.00030973	1	1	4	P35527	P35527 [251-261]		0	1386.75	0.805	52.19		100	R.QGVDADINGLR.Q
FALSE	[K].NYSPYYNTIDDLK.[D]	1xTMT6plex [K13]; 1xTMT6plex [N-Term]	0.00030973	1	1	5	P35527	P35527 [200-212]		0	2064.07	0.737	33.6		100	K.NYSPYYNTIDDLK.D
FALSE	[R].HGVQELEIELQSQLSK.[K]	1xTMT6plex [K16]; 1xTMT6plex [N-Term]	0.00030973	1	1	2	P35527	P35527 [375-390]		0	2296.29	0.946	29.99		100	R.HGVQELEIELQSQLSK.K
FALSE	[K].TLLDIDNTR.[M]	1xTMT6plex [N-Term]	0.00030973	1	1	6	P35527	P35527 [225-233]		0	1289.73	0.774	48.17		100	K.TLLDIDNTR.M
FALSE	[K].VQALEEANNDLENK.[I]	1xTMT6plex [K14]; 1xTMT6plex [N-Term]	0.00030973	1	1	10	P35527	P35527 [171-184]		0	2045.09	0.808	48.63		100	K.VQALEEANNDLENK.I
FALSE	[K].SDLEMQYETLQEELMALK.[K]	2xOxidation [M5; M15]; 1xTMT6plex [K18]; 1xTMT6plex [N-Term]	0.00030973	1	1	2	P35527	P35527 [272-289]		0	2661.34	0.883	26.95		100	K.SDLEMQYETLQEELMALK.K
FALSE	[R].SGGGGGGGLGSGGSIR.[S]	1xTMT6plex [N-Term]	0.00030973	1	1	9	P35527	P35527 [14-29]		0	1461.76	0.904	6.17		100	R.SGGGGGGGLGSGGSIR.S
FALSE	[R].QVLDNLTMEK.[S]	1xTMT6plex [K10]; 1xTMT6plex [N-Term]	0.00030973	1	1	6	P35527	P35527 [262-271]		0	1648.93	0.87	59.61		100	R.QVLDNLTMEK.S
FALSE	[R].QVLDNLTMEK.[S]	1xOxidation [M8]; 1xTMT6plex [K10]; 1xTMT6plex [N-Term]	0.00030973	1	1	12	P35527	P35527 [262-271]		0	1664.93	0.788	47.18		100	R.QVLDNLTMEK.S
FALSE	[K].STMQELNSR.[L]	1xTMT6plex [N-Term]	0.00030973	1	1	3	P35527	P35527 [155-163]		0	1294.66	0.848	27.75		100	K.STMQELNSR.L
FALSE	[K].STMQELNSR.[L]	1xOxidation [M3]; 1xTMT6plex [N-Term]	0.00030973	1	1	5	P35527	P35527 [155-163]		0	1310.66	0.855	53.93		100	K.STMQELNSR.L
FALSE	[R].FSSSGGGGGGGR.[F]	1xTMT6plex [N-Term]	0.00030973	1	1	13	P35527	P35527 [35-46]		0	1211.6	0.97	8.28		100	R.FSSSGGGGGGGR.F
FALSE	[R].FSSSSGYGGGSSR.[V]	1xTMT6plex [N-Term]	0.00030973	1	1	7	P35527	P35527 [47-59]		0	1464.69	0.925	0.96		100	R.FSSSSGYGGGSSR.V
FALSE	[K].DQIVDLTVGNNK.[T]	1xTMT6plex [K12]; 1xTMT6plex [N-Term]	0.00030973	1	1	9	P35527	P35527 [213-224]		0	1774.01	0.764	53.29		100	K.DQIVDLTVGNNK.T
FALSE	[K].EIETYHNLLEGGQEDFESSGAGK.[I]	1xTMT6plex [K23]; 1xTMT6plex [N-Term]	0.00030973	1	1	7	P35527	P35527 [450-472]		0	2968.46	0.818	39.42		100	K.EIETYHNLLEGGQEDFESSGAGK.I
FALSE	[R].GGSGGSYGR.[G]	1xTMT6plex [N-Term]	0.00030973	1	1	6	P35527	P35527 [479-487]		0	1026.52	0.854	14.64		100	R.GGSGGSYGR.G
FALSE	[R].GGSGGSYGGGGSGGGYGGGSGSR.[G]	1xTMT6plex [N-Term]	0.00030973	1	1	18	P35527	P35527 [491-513]		0	2020.89	0.894	26.67		100	R.GGSGGSYGGGGSGGGYGGGSGSR.G
FALSE	[R].GGGGSFGYSYGGGSGGGFSASSLGGGFGGGSR.[G]	1xTMT6plex [N-Term]	0.00030973	1	1	2	P35527	P35527 [64-95]		0	2934.32	0.811	27.32		100	R.GGGGSFGYSYGGGSGGGFSASSLGGGFGGGSR.G
FALSE	[K].TLNDMRQEYEQLIAK.[N]	1xTMT6plex [K15]; 1xTMT6plex [N-Term]	0.000568404	1	1	1	P35527	P35527 [322-336]		1	2310.25	0.942	31.73		100	K.TLNDMRQEYEQLIAK.N
FALSE	[K].FEMEQNLR.[Q]	1xOxidation [M3]; 1xTMT6plex [N-Term]	0.000568404	1	1	8	P35527	P35527 [243-250]		0	1311.66	0.719	61.62		100	K.FEMEQNLR.Q
FALSE	[K].FEMEQNLR.[Q]	1xTMT6plex [N-Term]	0.000568404	1	1	2	P35527	P35527 [243-250]		0	1295.66	0.949	13.82		100	K.FEMEQNLR.Q
FALSE	[K].GPAAIQK.[N]	1xTMT6plex [K7]; 1xTMT6plex [N-Term]	0.000568404	1	1	2	P35527	P35527 [193-199]		0	1142.73	0.638	63.84		100	K.GPAAIQK.N
FALSE	[K].KGPAAIQK.[N]	2xTMT6plex [K1; K8]; 1xTMT6plex [N-Term]	0.000568404	1	1	1	P35527	P35527 [192-199]		1	1499.99	0.81	53.08		100	K.KGPAAIQK.N
FALSE	[R].MTLDDFR.[I]	1xTMT6plex [N-Term]	0.00139174	1	1	4	P35527	P35527 [234-240]		0	1126.58	0.836	47.94		100	R.MTLDDFR.I
FALSE	[R].LASYLDK.[V]	1xTMT6plex [K7]; 1xTMT6plex [N-Term]	0.00237856	6	8	5	P02533; P13645; Q99456; Q04695; P35527; P08779	P02533 [126-132]; P13645 [157-163]; Q99456 [136-142]; Q04695 [95-101]; P35527 [164-170]; P08779 [128-134]		0	1267.77	0.865	50.57	Shared	100	R.LASYLDK.V
FALSE	[R].MTLDDFR.[I]	1xOxidation [M1]; 1xTMT6plex [N-Term]	0.00237856	1	1	4	P35527	P35527 [234-240]		0	1142.57	0.765	47.96		100	R.MTLDDFR.I
High	O43795	Unconventional myosin-Ib OS=Homo sapiens OX=9606 GN=MYO1B PE=1 SV=3	213.038	33	38	115	37	1136	131.9	9.38	361.07	38	4430	MYO1B	15717.5	18156.1	12816.7	19274.8	22968.4	14352.1
Checked	Annotated Sequence	Modifications	Qvality q-value	# Protein Groups	# Proteins	# PSMs	Master Protein Accessions	Positions in Master Proteins	Modifications in Master Proteins	# Missed Cleavages	Theo. MH+ [Da]	Abundance Ratio: (HO) / (WT)	Abundances (Grouped) CV [%]: HO	Quan Info	Channel Occupancy [%]	Sequence in Protein
FALSE	[K].MPSLSPIDK.[N]	1xTMT6plex [K9]; 1xTMT6plex [N-Term]	0.00030973	1	1	2	O43795	O43795 [889-897]		0	1445.84	0.892	37.68		100	K.MPSLSPIDK.N
FALSE	[R].QAYEPCLER.[Y]	1xCarbamidomethyl [C6]; 1xTMT6plex [N-Term]	0.00030973	1	1	2	O43795	O43795 [636-644]		0	1394.69	0.82	39.12		100	R.QAYEPCLER.Y
FALSE	[R].LEDLATLIQK.[I]	1xTMT6plex [K10]; 1xTMT6plex [N-Term]	0.00030973	1	1	2	O43795	O43795 [704-713]		0	1601.99	0.908	33.79		100	R.LEDLATLIQK.I
FALSE	[K].LEASELFK.[D]	1xTMT6plex [K8]; 1xTMT6plex [N-Term]	0.00030973	1	1	4	O43795	O43795 [942-949]		0	1394.83	0.868	35.39		100	K.LEASELFK.D
FALSE	[K].LGNIEFKPESR.[V]	1xTMT6plex [K7]; 1xTMT6plex [N-Term]	0.00030973	1	1	2	O43795	O43795 [281-291]		0	1748.01	0.804	33.06		100	K.LGNIEFKPESR.V
FALSE	[R].IFLLTNNNLLLADQK.[S]	1xTMT6plex [K15]; 1xTMT6plex [N-Term]	0.00030973	1	1	2	O43795	O43795 [1007-1021]		0	2188.31	0.809	29.63		100	R.IFLLTNNNLLLADQK.S
FALSE	[K].IIIAEVVNK.[I]	1xTMT6plex [K9]; 1xTMT6plex [N-Term]	0.00030973	1	1	4	O43795	O43795 [987-995]		0	1456.95	0.824	24.89		100	K.IIIAEVVNK.I
FALSE	[R].YNYLSLDSAK.[V]	1xTMT6plex [K10]; 1xTMT6plex [N-Term]	0.00030973	1	1	3	O43795	O43795 [232-241]		0	1631.9	0.944	34.98		100	R.YNYLSLDSAK.V
FALSE	[K].VLYQVEGFVDK.[N]	1xTMT6plex [K11]; 1xTMT6plex [N-Term]	0.00030973	1	1	7	O43795	O43795 [519-529]		0	1755.01	0.912	24.4		100	K.VLYQVEGFVDK.N
FALSE	[R].VNGLDESK.[I]	1xTMT6plex [K8]; 1xTMT6plex [N-Term]	0.00030973	1	1	4	O43795	O43795 [292-299]		0	1319.76	0.883	26.99		100	R.VNGLDESK.I
FALSE	[K].VNGVDDAANFR.[T]	1xTMT6plex [N-Term]	0.00030973	1	1	7	O43795	O43795 [242-252]		0	1406.72	0.862	31.68		100	K.VNGVDDAANFR.T
FALSE	[K].SEVPLVDVTK.[V]	1xTMT6plex [K10]; 1xTMT6plex [N-Term]	0.00030973	1	1	5	O43795	O43795 [1027-1036]		0	1544.93	0.851	28.04		100	K.SEVPLVDVTK.V
FALSE	[R].SLPIYSPEK.[V]	1xTMT6plex [K9]; 1xTMT6plex [N-Term]	0.00030973	1	1	3	O43795	O43795 [60-68]		0	1491.88	0.824	38.75		100	R.SLPIYSPEK.V
FALSE	[R].SGVEVLFNELEIPVEEYSFGR.[S]	1xTMT6plex [N-Term]	0.00030973	1	1	1	O43795	O43795 [662-682]		0	2642.36	1.028	6.06		100	R.SGVEVLFNELEIPVEEYSFGR.S
FALSE	[K].QRLEDLATLIQK.[I]	1xTMT6plex [K12]; 1xTMT6plex [N-Term]	0.00030973	1	1	1	O43795	O43795 [702-713]		1	1886.15	0.851	22.01		100	K.QRLEDLATLIQK.I
FALSE	[K].SSALVIQSYIR.[G]	1xTMT6plex [N-Term]	0.00030973	1	1	2	O43795	O43795 [752-762]		0	1465.86	0.809	34.54		100	K.SSALVIQSYIR.G
FALSE	[R].FLNDTSLPHSCFR.[I]	1xCarbamidomethyl [C11]; 1xTMT6plex [N-Term]	0.00030973	1	1	3	O43795	O43795 [499-511]		0	1822.91	1.012	0.88		100	R.FLNDTSLPHSCFR.I
FALSE	[R].DQFTDQQK.[L]	1xTMT6plex [K8]; 1xTMT6plex [N-Term]	0.00030973	1	1	3	O43795	O43795 [928-935]		0	1467.78	0.92	24.6		100	R.DQFTDQQK.L
FALSE	[K].EGSEAASK.[G]	1xTMT6plex [K8]; 1xTMT6plex [N-Term]	0.00030973	1	1	4	O43795	O43795 [1053-1060]		0	1236.68	0.905	14.35		100	K.EGSEAASK.G
FALSE	[K].EEQEEYIR.[E]	1xTMT6plex [N-Term]	0.00030973	1	1	1	O43795	O43795 [422-429]		0	1324.66	0.919	24.74		100	K.EEQEEYIR.E
FALSE	[K].EQLLQSNPVLEAFGNAK.[T]	1xTMT6plex [K17]; 1xTMT6plex [N-Term]	0.00030973	1	2	4	O43795	O43795 [140-156]		0	2316.3	0.952	24.86		100	K.EQLLQSNPVLEAFGNAK.T
FALSE	[K].ALYPSSVGQPFQGAYLEINK.[N]	1xTMT6plex [K20]; 1xTMT6plex [N-Term]	0.00030973	1	1	2	O43795	O43795 [953-972]		0	2640.44	0.866	41.24		100	K.ALYPSSVGQPFQGAYLEINK.N
FALSE	[K].DQCILITGESGAGK.[T]	1xCarbamidomethyl [C3]; 1xTMT6plex [K14]; 1xTMT6plex [N-Term]	0.00030973	1	1	3	O43795	O43795 [101-114]		0	1907.03	0.874	32.14		100	K.DQCILITGESGAGK.T
FALSE	[K].AAHIFNEALVCHQIR.[Y]	1xCarbamidomethyl [C11]; 1xTMT6plex [N-Term]	0.00030973	1	1	2	O43795	O43795 [603-617]		0	2008.07	0.948	1.54		100	K.AAHIFNEALVCHQIR.Y
FALSE	[K].GDPLGGVISNYLLEK.[S]	1xTMT6plex [K15]; 1xTMT6plex [N-Term]	0.00030973	1	1	5	O43795	O43795 [178-192]		0	2033.17	0.824	38.7		100	K.GDPLGGVISNYLLEK.S
FALSE	[R].DLSQAMWK.[A]	1xTMT6plex [K8]; 1xTMT6plex [N-Term]	0.00030973	1	1	2	O43795	O43795 [537-544]		0	1436.8	0.911	30.49		100	R.DLSQAMWK.A
FALSE	[K].GAEVNQVK.[E]	1xTMT6plex [K8]; 1xTMT6plex [N-Term]	0.000568404	1	1	5	O43795	O43795 [132-139]		0	1302.78	0.855	28.96		100	K.GAEVNQVK.E
FALSE	[R].YLGLLENVR.[V]	1xTMT6plex [N-Term]	0.000568404	1	2	1	O43795	O43795 [618-626]		0	1305.77	0.856	16.16		100	R.YLGLLENVR.V
FALSE	[K].NGSVPTCK.[R]	1xCarbamidomethyl [C7]; 1xTMT6plex [K8]; 1xTMT6plex [N-Term]	0.000568404	1	1	2	O43795	O43795 [1117-1124]		0	1320.73	0.822	34.42		100	K.NGSVPTCK.R
FALSE	[K].IYEFTLQR.[I]	1xTMT6plex [N-Term]	0.000568404	1	1	4	O43795	O43795 [869-876]		0	1298.73	0.855	31.38		100	K.IYEFTLQR.I
FALSE	[R].THFLLMK.[K]	1xOxidation [M6]; 1xTMT6plex [K7]; 1xTMT6plex [N-Term]	0.00139174	1	1	1	O43795	O43795 [722-728]		0	1363.82	0.845	24.15		100	R.THFLLMK.K
FALSE	[K].NNDLLYR.[DH]	1xTMT6plex [N-Term]	0.00139174	1	2	4	O43795	O43795 [530-536]		0	1136.63	0.842	24.37		100	K.NNDLLYR.D
FALSE	[R].LLEVAVP.[-]	1xTMT6plex [N-Term]	0.00218929	1	1	3	O43795	O43795 [1130-1136]		0	969.618	0.688	4.24		100	R.LLEVAVP.-
FALSE	[K].FIQGNQK.[N]	1xTMT6plex [K7]; 1xTMT6plex [N-Term]	0.00237856	1	1	3	O43795	O43795 [1110-1116]		0	1292.77	0.784	26.23		100	K.FIQGNQK.N
FALSE	[K].ASHALIK.[S]	1xTMT6plex [K7]; 1xTMT6plex [N-Term]	0.00237856	1	1	2	O43795	O43795 [545-551]		0	1197.77	0.881	14.98		100	K.ASHALIK.S
FALSE	[K].ASVATLMK.[N]	1xOxidation [M7]; 1xTMT6plex [K8]; 1xTMT6plex [N-Term]	0.00333498	1	1	2	O43795	O43795 [576-583]		0	1294.78	0.912	23.5		100	K.ASVATLMK.N
FALSE	[R].TTLSQTK.[Q]	1xTMT6plex [K7]; 1xTMT6plex [N-Term]	0.00380261	1	1	2	O43795	O43795 [1080-1086]		0	1236.76	0.87	29.57		100	R.TTLSQTK.Q
FALSE	[R].THFLLMK.[K]	1xTMT6plex [K7]; 1xTMT6plex [N-Term]	0.00573188	1	1	2	O43795	O43795 [722-728]		0	1347.82	0.932	8.75		100	R.THFLLMK.K
FALSE	[K].MPSLSPIDK.[N]	1xOxidation [M1]; 1xTMT6plex [K9]; 1xTMT6plex [N-Term]	0.00639451	1	1	2	O43795	O43795 [889-897]		0	1461.84	0.871	25.13		100	K.MPSLSPIDK.N
FALSE	[RK].NDNSSR.[F]	1xTMT6plex [N-Term]	0.00813383	8	24	1	O00159; P35580; P35749; Q9Y4I1; P35579; O43795; Q7Z406; O94832	O00159 [192-197]; P35580 [236-241]; P35749 [236-241]; Q9Y4I1 [214-219]; P35579 [229-234]; O43795 [160-165]; Q7Z406 [256-261]; O94832 [156-161]		0	921.459	0.893	42.41	Shared	100	R.NDNSSR.F
FALSE	[R].DLSQAMWK.[A]	1xOxidation [M6]; 1xTMT6plex [K8]; 1xTMT6plex [N-Term]	0.00903197	1	1	1	O43795	O43795 [537-544]		0	1452.79	0.87	17.25		100	R.DLSQAMWK.A
High	Q6WCQ1	Myosin phosphatase Rho-interacting protein OS=Homo sapiens OX=9606 GN=MPRIP PE=1 SV=3	201.447	43	37	80	36	1025	116.5	6.21	268.98	37	23164	MPRIP	6945.3	7914.3	5842.4	8256.4	9549.1	6559.3
Checked	Annotated Sequence	Modifications	Qvality q-value	# Protein Groups	# Proteins	# PSMs	Master Protein Accessions	Positions in Master Proteins	Modifications in Master Proteins	# Missed Cleavages	Theo. MH+ [Da]	Abundance Ratio: (HO) / (WT)	Abundances (Grouped) CV [%]: HO	Quan Info	Channel Occupancy [%]	Sequence in Protein
FALSE	[K].QEAELGEPDPEQK.[R]	1xTMT6plex [K13]; 1xTMT6plex [N-Term]	0.00030973	1	1	2	Q6WCQ1	Q6WCQ1 [515-527]		0	1928	0.784	26.41		100	K.QEAELGEPDPEQK.R
FALSE	[K].HWFVLADQSLR.[Y]	1xTMT6plex [N-Term]	0.00030973	1	1	1	Q6WCQ1	Q6WCQ1 [406-416]		0	1600.88	0.932	0		100	K.HWFVLADQSLR.Y
FALSE	[R].KVEPPTPQEPGPAK.[V]	2xTMT6plex [K1; K14]; 1xTMT6plex [N-Term]	0.00030973	1	1	3	Q6WCQ1	Q6WCQ1 [161-174]		1	2162.28	0.826	19.78		100	R.KVEPPTPQEPGPAK.V
FALSE	[R].LLAEETAATISAIEAMK.[N]	1xOxidation [M16]; 1xTMT6plex [K17]; 1xTMT6plex [N-Term]	0.00030973	1	1	2	Q6WCQ1	Q6WCQ1 [760-776]		0	2236.25	1.015	12.75		100	R.LLAEETAATISAIEAMK.N
FALSE	[R].VESGYFSLEK.[T]	1xTMT6plex [K10]; 1xTMT6plex [N-Term]	0.00030973	1	1	3	Q6WCQ1	Q6WCQ1 [263-272]		0	1616.89	0.833	28.88		100	R.VESGYFSLEK.T
FALSE	[R].TLLTGDGGGEATGSPLAQGK.[D]	1xTMT6plex [K20]; 1xTMT6plex [N-Term]	0.00030973	1	1	1	Q6WCQ1	Q6WCQ1 [878-897]		0	2288.25	0.856	32.21		100	R.TLLTGDGGGEATGSPLAQGK.D
FALSE	[R].VGGVGPADTHEPLRPEAEPGELER.[E]	1xTMT6plex [N-Term]	0.00030973	1	1	2	Q6WCQ1	Q6WCQ1 [560-583]		0	2741.41	0.942	4.56		100	R.VGGVGPADTHEPLRPEAEPGELER.E
FALSE	[K].THNVHVEIEQR.[W]	1xTMT6plex [N-Term]	0.00030973	1	1	4	Q6WCQ1	Q6WCQ1 [629-639]		0	1590.85	0.908	16.88		100	K.THNVHVEIEQR.W
FALSE	[R].QYLEELQSVQR.[E]	1xTMT6plex [N-Term]	0.00030973	1	1	3	Q6WCQ1	Q6WCQ1 [808-818]		0	1621.87	0.953	1.61		100	R.QYLEELQSVQR.E
FALSE	[K].TFDWAEFRPIQQALAQER.[V]	1xTMT6plex [N-Term]	0.00030973	1	1	1	Q6WCQ1	Q6WCQ1 [542-559]		0	2435.27	1.149	0.85		100	K.TFDWAEFRPIQQALAQER.V
FALSE	[R].SQISSVNSDVEALR.[R]	1xTMT6plex [N-Term]	0.00030973	1	1	2	Q6WCQ1	Q6WCQ1 [793-806]		0	1733.92	0.936	19.43		100	R.SQISSVNSDVEALR.R
FALSE	[R].SQISSVNSDVEALRR.[Q]	1xTMT6plex [N-Term]	0.00030973	1	1	1	Q6WCQ1	Q6WCQ1 [793-807]		1	1890.02	0.863	18.13		100	R.SQISSVNSDVEALRR.Q
FALSE	[R].STEPSVTPDLLNFK.[K]	1xTMT6plex [K14]; 1xTMT6plex [N-Term]	0.00030973	1	1	2	Q6WCQ1	Q6WCQ1 [377-390]		0	2006.12	0.817	35.47		100	R.STEPSVTPDLLNFK.K
FALSE	[K].STLWQEEMR.[T]	1xTMT6plex [N-Term]	0.00030973	1	1	1	Q6WCQ1	Q6WCQ1 [201-209]		0	1408.71	0.835	26.04		100	K.STLWQEEMR.T
FALSE	[K].SSCSFETCPRPTEK.[Q]	2xCarbamidomethyl [C3; C8]; 1xTMT6plex [K14]; 1xTMT6plex [N-Term]	0.00030973	1	1	1	Q6WCQ1	Q6WCQ1 [501-514]		0	2144.05	0.881	29.79		100	K.SSCSFETCPRPTEK.Q
FALSE	[K].FEALDIEK.[A]	1xTMT6plex [K8]; 1xTMT6plex [N-Term]	0.00030973	1	1	4	Q6WCQ1	Q6WCQ1 [307-314]		0	1422.82	0.855	34.14		100	K.FEALDIEK.A
FALSE	[K].FQANIFNK.[S]	1xTMT6plex [K8]; 1xTMT6plex [N-Term]	0.00030973	1	1	1	Q6WCQ1	Q6WCQ1 [12-19]		0	1439.84	0.734	35.97		100	K.FQANIFNK.S
FALSE	[K].DQPDGSSLSPAQSPSQSQPPAASSLR.[E]	1xTMT6plex [N-Term]	0.00030973	1	1	2	Q6WCQ1	Q6WCQ1 [212-237]		0	2824.39			No Quan Values		K.DQPDGSSLSPAQSPSQSQPPAASSLR.E
FALSE	[R].FGMLDATDGPGTEDAALR.[M]	1xTMT6plex [N-Term]	0.00030973	1	1	3	Q6WCQ1	Q6WCQ1 [596-613]		0	2066.01	1.072	9.11		100	R.FGMLDATDGPGTEDAALR.M
FALSE	[R].ELEVLSEQYSQK.[C]	1xTMT6plex [K12]; 1xTMT6plex [N-Term]	0.00030973	1	1	1	Q6WCQ1	Q6WCQ1 [819-830]		0	1911.05	0.712	28.85		100	R.ELEVLSEQYSQK.C
FALSE	[R].EGYVLQATCER.[G]	1xCarbamidomethyl [C9]; 1xTMT6plex [N-Term]	0.00030973	1	1	2	Q6WCQ1	Q6WCQ1 [716-726]		0	1554.78	0.778	42.87		100	R.EGYVLQATCER.G
FALSE	[K].ESEIQYLK.[Q]	1xTMT6plex [K8]; 1xTMT6plex [N-Term]	0.00030973	1	1	1	Q6WCQ1	Q6WCQ1 [910-917]		0	1467.85	0.961	23		100	K.ESEIQYLK.Q
FALSE	[K].EASDLLEQNR.[L]	1xTMT6plex [N-Term]	0.00030973	1	1	4	Q6WCQ1	Q6WCQ1 [689-698]		0	1403.73	0.938	28.31		100	K.EASDLLEQNR.L
FALSE	[R].ENQELNAHNQELNNR.[L]	1xTMT6plex [N-Term]	0.00030973	1	1	4	Q6WCQ1	Q6WCQ1 [854-868]		0	2052.01	0.932	18.32		100	R.ENQELNAHNQELNNR.L
FALSE	[K].AATEALGEK.[S]	1xTMT6plex [K9]; 1xTMT6plex [N-Term]	0.00030973	1	1	6	Q6WCQ1	Q6WCQ1 [968-976]		0	1347.79	0.841	23.89		100	K.AATEALGEK.S
FALSE	[K].DAYELEVLLR.[V]	1xTMT6plex [N-Term]	0.00030973	1	1	1	Q6WCQ1	Q6WCQ1 [898-907]		0	1449.82	0.994	21.51		100	K.DAYELEVLLR.V
FALSE	[R].GFAAMEETHQK.[K]	1xOxidation [M5]; 1xTMT6plex [K11]; 1xTMT6plex [N-Term]	0.00030973	1	1	1	Q6WCQ1	Q6WCQ1 [727-737]		0	1722.89	0.866	28.22		100	R.GFAAMEETHQK.K
FALSE	[K].AEHMETNAVGPSPSSDTR.[Q]	1xTMT6plex [N-Term]	0.00030973	1	1	2	Q6WCQ1	Q6WCQ1 [315-332]		0	2115	0.884	0.42		100	K.AEHMETNAVGPSPSSDTR.Q
FALSE	[K].CLENAHLAQALEAER.[Q]	1xCarbamidomethyl [C1]; 1xTMT6plex [N-Term]	0.00030973	1	1	2	Q6WCQ1	Q6WCQ1 [831-845]		0	1954	0.937	16.4		100	K.CLENAHLAQALEAER.Q
FALSE	[K].AEHMETNAVGPSPSSDTR.[Q]	1xOxidation [M4]; 1xTMT6plex [N-Term]	0.00030973	1	1	1	Q6WCQ1	Q6WCQ1 [315-332]		0	2130.99			No Quan Values		K.AEHMETNAVGPSPSSDTR.Q
FALSE	[K].DELQTALR.[D]	1xTMT6plex [N-Term]	0.000568404	1	1	3	Q6WCQ1	Q6WCQ1 [925-932]		0	1174.66	0.847	24.85		100	K.DELQTALR.D
FALSE	[K].ELEQSQK.[E]	1xTMT6plex [K7]; 1xTMT6plex [N-Term]	0.000568404	1	1	3	Q6WCQ1	Q6WCQ1 [682-688]		0	1319.76	0.891	28.48		100	K.ELEQSQK.E
FALSE	[R].NYGFQIHTK.[ED]	1xTMT6plex [K9]; 1xTMT6plex [N-Term]	0.00139174	2	2	1	Q6WCQ1; Q9H2D6	Q6WCQ1 [449-457]; Q9H2D6 [1853-1861]		0	1565.88			No Quan Values		R.NYGFQIHTK.E
FALSE	[R].LAAEITR.[L]	1xTMT6plex [N-Term]	0.00139174	1	1	1	Q6WCQ1	Q6WCQ1 [869-875]		0	1002.61	0.754	36.45		100	R.LAAEITR.L
FALSE	[K].SNPDFLK.[K]	1xTMT6plex [K7]; 1xTMT6plex [N-Term]	0.00139174	1	1	3	Q6WCQ1	Q6WCQ1 [993-999]		0	1278.75	0.812	25.83		100	K.SNPDFLK.K
FALSE	[R].WHQVETTPLR.[E]	1xTMT6plex [N-Term]	0.00237856	1	1	1	Q6WCQ1	Q6WCQ1 [640-649]		0	1495.82	1.005	13.87		100	R.WHQVETTPLR.E
FALSE	[R].LLQDQLR.[V]	1xTMT6plex [N-Term]	0.00380261	1	1	2	Q6WCQ1	Q6WCQ1 [699-705]		0	1114.68	0.832	34.34		100	R.LLQDQLR.V
FALSE	[R].EPGLESK.[E]	1xTMT6plex [K7]; 1xTMT6plex [N-Term]	0.00380261	1	1	2	Q6WCQ1	Q6WCQ1 [238-244]		0	1217.71	0.886	18.26		100	R.EPGLESK.E
High	P60709	Actin, cytoplasmic 1 OS=Homo sapiens OX=9606 GN=ACTB PE=1 SV=1	200.755	47	15	475	5	375	41.7	5.48	1562.25	15	60	ACTB	40002.5	50481.8	33811.5	47327.1	68060.3	37443.5
Checked	Annotated Sequence	Modifications	Qvality q-value	# Protein Groups	# Proteins	# PSMs	Master Protein Accessions	Positions in Master Proteins	Modifications in Master Proteins	# Missed Cleavages	Theo. MH+ [Da]	Abundance Ratio: (HO) / (WT)	Abundances (Grouped) CV [%]: HO	Quan Info	Channel Occupancy [%]	Sequence in Protein
FALSE	[K].QEYDESGPSIVHR.[K]	1xTMT6plex [N-Term]	0.00030973	1	7	5	P60709	P60709 [360-372]		0	1745.87	1.002	12.44		100	K.QEYDESGPSIVHR.K
FALSE	[K].LCYVALDFEQEMATAASSSSLEK.[S]	1xCarbamidomethyl [C2]; 1xTMT6plex [K23]; 1xTMT6plex [N-Term]	0.00030973	1	3	5	P60709	P60709 [216-238]		0	3008.5	0.834	20.03		100	K.LCYVALDFEQEMATAASSSSLEK.S
FALSE	[K].LCYVALDFEQEMATAASSSSLEK.[S]	1xCarbamidomethyl [C2]; 1xOxidation [M12]; 1xTMT6plex [K23]; 1xTMT6plex [N-Term]	0.00030973	1	3	1	P60709	P60709 [216-238]		0	3024.49	0.701	51.19		100	K.LCYVALDFEQEMATAASSSSLEK.S
FALSE	[R].HQGVMVGMGQK.[D]	1xTMT6plex [K11]; 1xTMT6plex [N-Term]	0.00030973	3	7	7	P63267; P60709; Q562R1	P63267 [41-51]; P60709 [40-50]; Q562R1 [41-51]		0	1629.9	0.783	10.12	Shared	100	R.HQGVMVGMGQK.D
FALSE	[R].HQGVMVGMGQK.[D]	1xOxidation [M]; 1xTMT6plex [K11]; 1xTMT6plex [N-Term]	0.00030973	3	7	44	P63267; P60709; Q562R1	P63267 [41-51]; P60709 [40-50]; Q562R1 [41-51]		0	1645.89	0.765	19.56	Shared	100	R.HQGVMVGMGQK.D
FALSE	[R].HQGVMVGMGQK.[D]	2xOxidation [M5; M8]; 1xTMT6plex [K11]; 1xTMT6plex [N-Term]	0.00030973	3	7	50	P63267; P60709; Q562R1	P63267 [41-51]; P60709 [40-50]; Q562R1 [41-51]		0	1661.89	0.851	12.81	Shared	100	R.HQGVMVGMGQK.D
FALSE	[R].VAPEEHPVLLTEAPLNPK.[A]	1xTMT6plex [K18]; 1xTMT6plex [N-Term]	0.00030973	1	2	41	P60709	P60709 [96-113]		0	2412.39	0.799	22.37		100	R.VAPEEHPVLLTEAPLNPK.A
FALSE	[KR].SYELPDGQVITIGNER.[F]	1xTMT6plex [N-Term]	0.00030973	3	10	35	P63267; P60709; Q562R1	P63267 [240-255]; P60709 [239-254]; Q562R1 [240-255]		0	2020.05	0.828	23.39	Shared	100	K.SYELPDGQVITIGNER.F
FALSE	[R].AVFPSIVGRPR.[QH]	1xTMT6plex [N-Term]	0.00030973	2	9	3	P63267; P60709	P63267 [30-40]; P60709 [29-39]		0	1427.87	0.795	18.42	Shared	100	R.AVFPSIVGRPR.H
FALSE	[K].DSYVGDEAQSK.[R]	1xTMT6plex [K11]; 1xTMT6plex [N-Term]	0.00030973	2	6	16	P63267; P60709	P63267 [52-62]; P60709 [51-61]		0	1656.85	0.783	26.29	Shared	100	K.DSYVGDEAQSK.R
FALSE	[K].EITALAPSTMK.[I]	1xTMT6plex [K11]; 1xTMT6plex [N-Term]	0.00030973	2	6	19	P63267; P60709	P63267 [317-327]; P60709 [316-326]		0	1619.94	0.757	24.94	Shared	100	K.EITALAPSTMK.I
FALSE	[K].EITALAPSTMK.[I]	1xOxidation [M10]; 1xTMT6plex [K11]; 1xTMT6plex [N-Term]	0.00030973	2	6	72	P63267; P60709	P63267 [317-327]; P60709 [316-326]		0	1635.94	0.906	8.36	Shared	100	K.EITALAPSTMK.I
FALSE	[R].GYSFTTTAER.[E]	1xTMT6plex [N-Term]	0.00030973	1	2	15	P60709	P60709 [197-206]		0	1361.69	0.743	24.14		100	R.GYSFTTTAER.E
FALSE	[K].AGFAGDDAPR.[A]	1xTMT6plex [N-Term]	0.00030973	2	10	30	P63267; P60709	P63267 [20-29]; P60709 [19-28]		0	1205.61	0.758	25.95	Shared	100	K.AGFAGDDAPR.A
FALSE	[R].DLTDYLMK.[I]	1xOxidation [M7]; 1xTMT6plex [K8]; 1xTMT6plex [N-Term]	0.00030973	3	7	57	P63267; P60709; Q562R1	P63267 [185-192]; P60709 [184-191]; Q562R1 [185-192]		0	1472.81	0.783	33.21	Shared	100	R.DLTDYLMK.I
FALSE	[R].DLTDYLMK.[I]	1xTMT6plex [K8]; 1xTMT6plex [N-Term]	0.00030973	3	7	13	P63267; P60709; Q562R1	P63267 [185-192]; P60709 [184-191]; Q562R1 [185-192]		0	1456.81	0.744	35.01	Shared	100	R.DLTDYLMK.I
FALSE	[K].DLYANTVLSGGTTMYPGIADR.[M]	1xTMT6plex [N-Term]	0.00030973	1	2	14	P60709	P60709 [292-312]		0	2444.23	0.793	32.56		100	K.DLYANTVLSGGTTMYPGIADR.M
FALSE	[K].DLYANTVLSGGTTMYPGIADR.[M]	1xOxidation [M14]; 1xTMT6plex [N-Term]	0.00030973	1	2	34	P60709	P60709 [292-312]		0	2460.23	0.887	25.18		100	K.DLYANTVLSGGTTMYPGIADR.M
FALSE	[K].IIAPPERK.[Y]	1xTMT6plex [K8]; 1xTMT6plex [N-Term]	0.00139174	3	7	3	P63267; P60709; Q562R1	P63267 [330-337]; P60709 [329-336]; Q562R1 [330-337]		1	1381.89	0.611	19.98	Shared	100	K.IIAPPERK.Y
FALSE	[K].RGILTLK.[Y]	1xTMT6plex [K7]; 1xTMT6plex [N-Term]	0.00237856	2	10	3	P63267; P60709	P63267 [63-69]; P60709 [62-68]		1	1258.86	0.588	42.24	Shared	100	K.RGILTLK.Y
FALSE	[K].IIAPPER.[K]	1xTMT6plex [N-Term]	0.00616547	3	7	8	P63267; P60709; Q562R1	P63267 [330-336]; P60709 [329-335]; Q562R1 [330-336]		0	1024.64	0.737	28.75	Shared	100	K.IIAPPER.K
High	P02545	Prelamin-A/C OS=Homo sapiens OX=9606 GN=LMNA PE=1 SV=1	174.875	52	32	72	32	664	74.1	7.02	229.7	32	4000	LMNA	6182.9	9366.7	5485	6969.5	11646.6	7533.1
Checked	Annotated Sequence	Modifications	Qvality q-value	# Protein Groups	# Proteins	# PSMs	Master Protein Accessions	Positions in Master Proteins	Modifications in Master Proteins	# Missed Cleavages	Theo. MH+ [Da]	Abundance Ratio: (HO) / (WT)	Abundances (Grouped) CV [%]: HO	Quan Info	Channel Occupancy [%]	Sequence in Protein
FALSE	[R].MQQQLDEYQELLDIK.[L]	1xTMT6plex [K15]; 1xTMT6plex [N-Term]	0.00030973	1	1	2	P02545	P02545 [352-366]		0	2352.25	0.83	24.42		100	R.MQQQLDEYQELLDIK.L
FALSE	[R].MQQQLDEYQELLDIK.[L]	1xOxidation [M1]; 1xTMT6plex [K15]; 1xTMT6plex [N-Term]	0.00030973	1	1	3	P02545	P02545 [352-366]		0	2368.25	0.757	18.9		100	R.MQQQLDEYQELLDIK.L
FALSE	[R].ITESEEVVSR.[E]	1xTMT6plex [N-Term]	0.00030973	1	1	3	P02545	P02545 [63-72]		0	1377.74	0.716	0.43		100	R.ITESEEVVSR.E
FALSE	[R].LVEIDNGK.[Q]	1xTMT6plex [K8]; 1xTMT6plex [N-Term]	0.00030973	1	1	4	P02545	P02545 [226-233]		0	1345.81	0.604	21.39		100	R.LVEIDNGK.Q
FALSE	[K].NIYSEELR.[E]	1xTMT6plex [N-Term]	0.00030973	1	1	3	P02545	P02545 [209-216]		0	1252.67	0.645	16.42		100	K.NIYSEELR.E
FALSE	[R].NSNLVGAAHEELQQSR.[I]	1xTMT6plex [N-Term]	0.00030973	1	1	1	P02545	P02545 [281-296]		0	1982.03	0.702	8.55		100	R.NSNLVGAAHEELQQSR.I
FALSE	[R].IDSLSAQLSQLQK.[Q]	1xTMT6plex [K13]; 1xTMT6plex [N-Term]	0.00030973	1	1	2	P02545	P02545 [299-311]		0	1889.11	0.695	21.05		100	R.IDSLSAQLSQLQK.Q
FALSE	[K].LEAALGEAK.[K]	1xTMT6plex [K9]; 1xTMT6plex [N-Term]	0.00030973	1	1	4	P02545	P02545 [172-180]		0	1359.82	0.684	26.49		100	K.LEAALGEAK.K
FALSE	[R].LADALQELR.[A]	1xTMT6plex [N-Term]	0.00030973	1	1	3	P02545	P02545 [241-249]		0	1257.74	0.61	0.13		100	R.LADALQELR.A
FALSE	[R].VAVEEVDEEGK.[F]	1xTMT6plex [K11]; 1xTMT6plex [N-Term]	0.00030973	1	1	2	P02545	P02545 [440-450]		0	1661.9	0.649	12.79		100	R.VAVEEVDEEGK.F
FALSE	[R].SGAQASSTPLSPTR.[I]	1xTMT6plex [N-Term]	0.00030973	1	1	4	P02545	P02545 [12-25]		0	1588.85	0.684	8.84		100	R.SGAQASSTPLSPTR.I
FALSE	[R].SLETENAGLR.[L]	1xTMT6plex [N-Term]	0.00030973	1	1	2	P02545	P02545 [51-60]		0	1318.72	0.601	3.01		100	R.SLETENAGLR.L
FALSE	[R].QNGDDPLLTYR.[F]	1xTMT6plex [N-Term]	0.00030973	1	1	2	P02545	P02545 [472-482]		0	1520.79	0.557	35.4		100	R.QNGDDPLLTYR.F
FALSE	[R].TALINSTGEEVAMR.[K]	1xTMT6plex [N-Term]	0.00030973	1	1	3	P02545	P02545 [528-541]		0	1720.91	0.859	17.21		100	R.TALINSTGEEVAMR.K
FALSE	[R].TALINSTGEEVAMR.[K]	1xOxidation [M13]; 1xTMT6plex [N-Term]	0.00030973	1	1	2	P02545	P02545 [528-541]		0	1736.91	0.71	13.6		100	R.TALINSTGEEVAMR.K
FALSE	[K].SNEDQSMGNWQIK.[R]	1xTMT6plex [K13]; 1xTMT6plex [N-Term]	0.00030973	1	1	1	P02545	P02545 [458-470]		0	1995	0.934	8.57		100	K.SNEDQSMGNWQIK.R
FALSE	[K].EAALSTALSEK.[R]	1xTMT6plex [K11]; 1xTMT6plex [N-Term]	0.00030973	1	1	3	P02545	P02545 [145-155]		0	1577.92	0.689	17.66		100	K.EAALSTALSEK.R
FALSE	[K].AQNTWGCGNSLR.[T]	1xCarbamidomethyl [C7]; 1xTMT6plex [N-Term]	0.00030973	1	1	1	P02545	P02545 [516-527]		0	1592.78	0.64	25.63		100	K.AQNTWGCGNSLR.T
FALSE	[K].EGDLIAAQAR.[L]	1xTMT6plex [N-Term]	0.00030973	1	1	4	P02545	P02545 [124-133]		0	1272.71	0.646	10.73		100	K.EGDLIAAQAR.L
FALSE	[K].ASASGSGAQVGGPISSGSSASSVTVTR.[S]	1xTMT6plex [N-Term]	0.00030973	1	1	1	P02545	P02545 [598-624]		0	2594.32			No Quan Values		K.ASASGSGAQVGGPISSGSSASSVTVTR.S
FALSE	[R].AQHEDQVEQYK.[K]	1xTMT6plex [K11]; 1xTMT6plex [N-Term]	0.00030973	1	1	3	P02545	P02545 [250-260]		0	1832.95	0.832	19.2		100	R.AQHEDQVEQYK.K
FALSE	[K].EDLQELNDR.[L]	1xTMT6plex [N-Term]	0.00030973	1	1	1	P02545	P02545 [33-41]		0	1360.69			No Quan Values		K.EDLQELNDR.L
FALSE	[K].AAYEAELGDAR.[K]	1xTMT6plex [N-Term]	0.00030973	1	1	1	P02545	P02545 [79-89]		0	1394.71	0.763	21.28		100	K.AAYEAELGDAR.K
FALSE	[K].DLEALLNSK.[E]	1xTMT6plex [K9]; 1xTMT6plex [N-Term]	0.00030973	1	1	2	P02545	P02545 [136-144]		0	1460.87	0.657	17.23		100	K.DLEALLNSK.E
FALSE	[R].DLEDSLAR.[E]	1xTMT6plex [N-Term]	0.000568404	1	1	1	P02545	P02545 [322-329]		0	1147.62	0.584	32.54		100	R.DLEDSLAR.E
FALSE	[R].TLEGELHDLR.[G]	1xTMT6plex [N-Term]	0.000568404	1	1	1	P02545	P02545 [157-166]		0	1411.77	0.88	14.64		100	R.TLEGELHDLR.G
FALSE	[K].TLDSVAK.[E]	1xTMT6plex [K7]; 1xTMT6plex [N-Term]	0.000568404	1	1	3	P02545	P02545 [91-97]		0	1191.73	0.587	17.65		100	K.TLDSVAK.E
FALSE	[R].LAVYIDR.[V]	1xTMT6plex [N-Term]	0.000568404	1	1	1	P02545	P02545 [42-48]		0	1078.65	0.682	4.85		100	R.LAVYIDR.V
FALSE	[R].LSPSPTSQR.[S]	1xTMT6plex [N-Term]	0.00164966	1	1	2	P02545	P02545 [389-397]		0	1201.67	0.569	20.57		100	R.LSPSPTSQR.S
FALSE	[R].SVGGSGGGSFGDNLVTR.[S]	1xTMT6plex [N-Term]	0.00192392	1	1	1	P02545	P02545 [628-644]		0	1795.91	0.711	3.35		100	R.SVGGSGGGSFGDNLVTR.S
FALSE	[R].LQLELSK.[V]	1xTMT6plex [K7]; 1xTMT6plex [N-Term]	0.00218929	1	1	2	P02545	P02545 [102-108]		0	1288.82	0.55	27.78		100	R.LQLELSK.V
FALSE	[K].EELDFQK.[N]	1xTMT6plex [K7]; 1xTMT6plex [N-Term]	0.00218929	1	1	2	P02545	P02545 [202-208]		0	1366.76	0.59	10.9		100	K.EELDFQK.N
FALSE	[K].LESTESR.[S]	1xTMT6plex [N-Term]	0.00550176	1	1	1	P02545	P02545 [421-427]		0	1050.56	0.711	3.94		100	K.LESTESR.S
FALSE	[K].QLQDEMLR.[R]	1xOxidation [M6]; 1xTMT6plex [N-Term]	0.00966706	1	1	1	P02545	P02545 [182-189]		0	1277.67	0.641	9.18		100	K.QLQDEMLR.R
High	Q05682	Caldesmon OS=Homo sapiens OX=9606 GN=CALD1 PE=1 SV=3	163.087	28	22	79	22	793	93.2	5.66	262.89	22	800	CALD1	6762.2	7338.7	5700.9	8021	9301.6	5790
Checked	Annotated Sequence	Modifications	Qvality q-value	# Protein Groups	# Proteins	# PSMs	Master Protein Accessions	Positions in Master Proteins	Modifications in Master Proteins	# Missed Cleavages	Theo. MH+ [Da]	Abundance Ratio: (HO) / (WT)	Abundances (Grouped) CV [%]: HO	Quan Info	Channel Occupancy [%]	Sequence in Protein
FALSE	[K].MPEDGLSDDK.[K]	1xTMT6plex [K10]; 1xTMT6plex [N-Term]	0.00030973	1	1	3	Q05682	Q05682 [622-631]		0	1564.79	0.834	33.79		100	K.MPEDGLSDDK.K
FALSE	[R].MQNDTAENETTEK.[E]	1xTMT6plex [K13]; 1xTMT6plex [N-Term]	0.00030973	1	1	1	Q05682	Q05682 [137-149]		0	1968.96	0.961	15.24		100	R.MQNDTAENETTEK.E
FALSE	[R].MQNDTAENETTEK.[E]	1xOxidation [M1]; 1xTMT6plex [K13]; 1xTMT6plex [N-Term]	0.00030973	1	1	2	Q05682	Q05682 [137-149]		0	1984.95	0.883	3.9		100	R.MQNDTAENETTEK.E
FALSE	[K].QEEESLGQVTDQVEVNAQNSVPDEEAK.[T]	1xTMT6plex [K27]; 1xTMT6plex [N-Term]	0.00030973	1	1	3	Q05682	Q05682 [54-80]		0	3430.69	0.898	30.89		100	K.QEEESLGQVTDQVEVNAQNSVPDEEAK.T
FALSE	[R].LEQYTSAIEGTK.[S]	1xTMT6plex [K12]; 1xTMT6plex [N-Term]	0.00030973	1	1	8	Q05682	Q05682 [679-690]		0	1798	0.916	31.84		100	R.LEQYTSAIEGTK.S
FALSE	[K].TTTTNTQVEGDDEAAFLER.[L]	1xTMT6plex [N-Term]	0.00030973	1	1	5	Q05682	Q05682 [81-99]		0	2327.12	0.868	22.98		100	K.TTTTNTQVEGDDEAAFLER.L
FALSE	[R].YEIEETETVTK.[S]	1xTMT6plex [K11]; 1xTMT6plex [N-Term]	0.00030973	1	1	6	Q05682	Q05682 [160-170]		0	1799.97	0.895	33.83		100	R.YEIEETETVTK.S
FALSE	[K].QQEAALELEELK.[K]	1xTMT6plex [K12]; 1xTMT6plex [N-Term]	0.00030973	1	1	10	Q05682	Q05682 [558-569]		0	1859.05	0.894	26.26		100	K.QQEAALELEELK.K
FALSE	[K].QQEAALELEELKK.[K]	2xTMT6plex [K12; K13]; 1xTMT6plex [N-Term]	0.00030973	1	1	1	Q05682	Q05682 [558-570]		1	2216.31	0.786	35.76		100	K.QQEAALELEELKK.K
FALSE	[R].RGETESEEFEK.[L]	1xTMT6plex [K11]; 1xTMT6plex [N-Term]	0.00030973	1	1	3	Q05682	Q05682 [543-553]		1	1798.92	0.984	17.05		100	R.RGETESEEFEK.L
FALSE	[K].SQNGEFMTHK.[L]	1xOxidation [M7]; 1xTMT6plex [K10]; 1xTMT6plex [N-Term]	0.00030973	1	1	2	Q05682	Q05682 [493-502]		0	1652.85	0.878	4.16		100	K.SQNGEFMTHK.L
FALSE	[K].STHQAAIVSK.[I]	1xTMT6plex [K10]; 1xTMT6plex [N-Term]	0.00030973	1	1	1	Q05682	Q05682 [665-674]		0	1499.89			No Quan Values		K.STHQAAIVSK.I
FALSE	[K].EAEGAPQVEAGK.[R]	1xTMT6plex [K12]; 1xTMT6plex [N-Term]	0.00030973	1	1	6	Q05682	Q05682 [523-534]		0	1643.9	0.91	21.86		100	K.EAEGAPQVEAGK.R
FALSE	[K].EFDPTITDASLSLPSR.[R]	1xTMT6plex [N-Term]	0.00030973	1	1	10	Q05682	Q05682 [120-135]		0	1978.03	1.021	20.94		100	K.EFDPTITDASLSLPSR.R
FALSE	[K].EFDPTITDASLSLPSRR.[M]	1xTMT6plex [N-Term]	0.00030973	1	1	1	Q05682	Q05682 [120-136]		1	2134.13	0.822	5.71		100	K.EFDPTITDASLSLPSRR.M
FALSE	[K].EKEEEEEEKPK.[R]	3xTMT6plex [K2; K9; K11]; 1xTMT6plex [N-Term]	0.00030973	1	1	4	Q05682	Q05682 [189-199]		1	2320.31	0.887	28.56		100	K.EKEEEEEEKPK.R
FALSE	[K].GNVFSSPTAAGTPNK.[E]	1xTMT6plex [K15]; 1xTMT6plex [N-Term]	0.00030973	1	1	2	Q05682	Q05682 [719-733]		0	1906.04	0.9	36.18		100	K.GNVFSSPTAAGTPNK.E
FALSE	[R].GETESEEFEK.[L]	1xTMT6plex [K10]; 1xTMT6plex [N-Term]	0.00030973	1	1	1	Q05682	Q05682 [544-553]		0	1642.82	0.908	27.02		100	R.GETESEEFEK.L
FALSE	[K].LQEDKPTFK.[K]	2xTMT6plex [K5; K9]; 1xTMT6plex [N-Term]	0.00164966	1	1	1	Q05682	Q05682 [451-459]		0	1793.08	0.924	36.45		100	K.LQEDKPTFK.K
FALSE	[R].INEWLTK.[T]	1xTMT6plex [K7]; 1xTMT6plex [N-Term]	0.00258338	1	1	2	Q05682	Q05682 [746-752]		0	1361.82	0.892	29.44		100	R.INEWLTK.T
FALSE	[R].LQEALER.[Q]	1xTMT6plex [N-Term]	0.00258338	1	1	3	Q05682	Q05682 [111-117]		0	1087.63	0.933	21.87		100	R.LQEALER.Q
FALSE	[K].RLQEALER.[Q]	1xTMT6plex [N-Term]	0.00283146	1	1	2	Q05682	Q05682 [110-117]		1	1243.73	1.012	9.33		100	K.RLQEALER.Q
FALSE	[R].RAEAAEK.[R]	1xTMT6plex [K7]; 1xTMT6plex [N-Term]	0.00333498	1	1	1	Q05682	Q05682 [612-618]		1	1232.74	1.008	11.95		100	R.RAEAAEK.R
FALSE	[K].MPEDGLSDDK.[K]	1xOxidation [M1]; 1xTMT6plex [K10]; 1xTMT6plex [N-Term]	0.0085999	1	1	1	Q05682	Q05682 [622-631]		0	1580.79	0.962	7.08		100	K.MPEDGLSDDK.K
High	P53814	Smoothelin OS=Homo sapiens OX=9606 GN=SMTN PE=1 SV=7	154.584	38	28	60	28	917	99	9.07	171.49	28	6525	SMTN	5324.9	5231.5	4662.5	6081.5	6333.3	4321.3
Checked	Annotated Sequence	Modifications	Qvality q-value	# Protein Groups	# Proteins	# PSMs	Master Protein Accessions	Positions in Master Proteins	Modifications in Master Proteins	# Missed Cleavages	Theo. MH+ [Da]	Abundance Ratio: (HO) / (WT)	Abundances (Grouped) CV [%]: HO	Quan Info	Channel Occupancy [%]	Sequence in Protein
FALSE	[K].MLDQSTDFEERK.[L]	1xTMT6plex [K12]; 1xTMT6plex [N-Term]	0.00030973	1	1	1	P53814	P53814 [595-606]		1	1957.01	0.796	21.31		100	K.MLDQSTDFEERK.L
FALSE	[R].QELEREEEALASK.[R]	1xTMT6plex [K13]; 1xTMT6plex [N-Term]	0.00030973	1	1	2	P53814	P53814 [40-52]		1	1990.09	0.983	33.57		100	R.QELEREEEALASK.R
FALSE	[R].LAGQLESMNDVEELTALLR.[S]	1xOxidation [M8]; 1xTMT6plex [N-Term]	0.00030973	1	1	1	P53814	P53814 [82-100]		0	2347.24	1.296	5.63		100	R.LAGQLESMNDVEELTALLR.S
FALSE	[R].LQDGTPQAALSPLTPAR.[L]	1xTMT6plex [N-Term]	0.00030973	1	1	5	P53814	P53814 [347-363]		0	1965.1	0.972	34.07		100	R.LQDGTPQAALSPLTPAR.L
FALSE	[R].LLGPSLTSTTPASSSSGSSSR.[G]	1xTMT6plex [N-Term]	0.00030973	1	1	2	P53814	P53814 [364-384]		0	2209.15	1.077	20.15		100	R.LLGPSLTSTTPASSSSGSSSR.G
FALSE	[R].TTTVESSFVR.[R]	1xTMT6plex [N-Term]	0.00030973	1	1	2	P53814	P53814 [684-693]		0	1355.74	1.013	27.32		100	R.TTTVESSFVR.R
FALSE	[K].TTSPEPQESPTLPSTEGQVVNK.[L]	1xTMT6plex [K22]; 1xTMT6plex [N-Term]	0.00030973	1	1	2	P53814	P53814 [243-264]		0	2784.47	0.978	42.76		100	K.TTSPEPQESPTLPSTEGQVVNK.L
FALSE	[K].TTFTIEIK.[D]	1xTMT6plex [K8]; 1xTMT6plex [N-Term]	0.00030973	1	1	1	P53814	P53814 [459-466]		0	1410.86	0.985	35.5		100	K.TTFTIEIK.D
FALSE	[R].VLLPTGNQR.[A]	1xTMT6plex [N-Term]	0.00030973	1	1	1	P53814	P53814 [477-485]		0	1226.74	0.978	35.87		100	R.VLLPTGNQR.A
FALSE	[R].SEEPGAPLPVAVGTAEPGGSMK.[T]	1xTMT6plex [K22]; 1xTMT6plex [N-Term]	0.00030973	1	1	1	P53814	P53814 [437-458]		0	2539.35	0.995	6.08		100	R.SEEPGAPLPVAVGTAEPGGSMK.T
FALSE	[R].SEEPGAPLPVAVGTAEPGGSMK.[T]	1xOxidation [M21]; 1xTMT6plex [K22]; 1xTMT6plex [N-Term]	0.00030973	1	1	2	P53814	P53814 [437-458]		0	2555.34	0.912	27.78		100	R.SEEPGAPLPVAVGTAEPGGSMK.T
FALSE	[R].STSFGVPNANSIK.[Q]	1xTMT6plex [K13]; 1xTMT6plex [N-Term]	0.00030973	1	1	2	P53814	P53814 [790-802]		0	1780	0.982	11.11		100	R.STSFGVPNANSIK.Q
FALSE	[R].SPLSAEELMTIEDEGVLDK.[M]	1xTMT6plex [K19]; 1xTMT6plex [N-Term]	0.00030973	1	1	2	P53814	P53814 [576-594]		0	2534.33	1.113	43.36		100	R.SPLSAEELMTIEDEGVLDK.M
FALSE	[R].SPLSAEELMTIEDEGVLDK.[M]	1xOxidation [M9]; 1xTMT6plex [K19]; 1xTMT6plex [N-Term]	0.00030973	1	1	1	P53814	P53814 [576-594]		0	2550.33	1.033	2.17		100	R.SPLSAEELMTIEDEGVLDK.M
FALSE	[R].AGSLAALEK.[R]	1xTMT6plex [K9]; 1xTMT6plex [N-Term]	0.00030973	1	1	1	P53814	P53814 [732-740]		0	1317.81	1.058	30.04		100	R.AGSLAALEK.R
FALSE	[R].APPTLLSTSSGGK.[S]	1xTMT6plex [K13]; 1xTMT6plex [N-Term]	0.00030973	1	1	1	P53814	P53814 [494-506]		0	1673.98	0.952	30.46		100	R.APPTLLSTSSGGK.S
FALSE	[R].AQEIEAATLAGR.[L]	1xTMT6plex [N-Term]	0.00030973	1	1	3	P53814	P53814 [120-131]		0	1458.81	0.916	29.32		100	R.AQEIEAATLAGR.L
FALSE	[R].ESTPLASGPSSFQR.[A]	1xTMT6plex [N-Term]	0.00030973	1	1	2	P53814	P53814 [313-326]		0	1692.88	0.924	38.53		100	R.ESTPLASGPSSFQR.A
FALSE	[R].GVAQPLAQLR.[S]	1xTMT6plex [N-Term]	0.00030973	1	1	2	P53814	P53814 [399-408]		0	1281.78	0.964	28.6		100	R.GVAQPLAQLR.S
FALSE	[R].AADGSAVSTVTK.[T]	1xTMT6plex [K12]; 1xTMT6plex [N-Term]	0.00030973	1	1	3	P53814	P53814 [657-668]		0	1564.89	0.925	29.58		100	R.AADGSAVSTVTK.T
FALSE	[R].AELTLGLR.[A]	1xTMT6plex [N-Term]	0.00030973	1	1	3	P53814	P53814 [486-493]		0	1101.68	0.99	32.6		100	R.AELTLGLR.A
FALSE	[R].SENGSGSTMMQTK.[T]	1xTMT6plex [K13]; 1xTMT6plex [N-Term]	0.000568404	1	1	1	P53814	P53814 [695-707]		0	1815.9	1.093	17.87		100	R.SENGSGSTMMQTK.T
FALSE	[R].SENGSGSTMMQTK.[T]	2xOxidation [M9; M10]; 1xTMT6plex [K13]; 1xTMT6plex [N-Term]	0.000568404	1	1	1	P53814	P53814 [695-707]		0	1847.89	1.395	26.78		100	R.SENGSGSTMMQTK.T
FALSE	[K].ENWLHSQQR.[E]	1xTMT6plex [N-Term]	0.000568404	1	1	2	P53814	P53814 [63-71]		0	1426.74	0.9	19.54		100	K.ENWLHSQQR.E
FALSE	[R].SLSVLSPR.[Q]	1xTMT6plex [N-Term]	0.00139174	1	1	2	P53814	P53814 [299-306]		0	1087.67	1.728	36.98		100	R.SLSVLSPR.Q
FALSE	[R].LVHSNDGTR.[T]	1xTMT6plex [N-Term]	0.00218929	1	1	3	P53814	P53814 [672-680]		0	1227.66	0.684	5.21		100	R.LVHSNDGTR.T
FALSE	[K].FTSDSPMAAR.[L]	1xOxidation [M7]; 1xTMT6plex [N-Term]	0.00237856	1	1	3	P53814	P53814 [337-346]		0	1327.65	0.867	17.34		100	K.FTSDSPMAAR.L
FALSE	[K].ETPAAQSPTR.[G]	1xTMT6plex [N-Term]	0.00237856	1	1	2	P53814	P53814 [271-280]		0	1286.69	1.112	20.82		100	K.ETPAAQSPTR.G
FALSE	[R].GQASTGR.[V]	1xTMT6plex [N-Term]	0.00237856	1	1	2	P53814	P53814 [470-476]		0	905.5	1.083	25.98		100	R.GQASTGR.V
FALSE	[R].VNSPGTLAR.[L]	1xTMT6plex [N-Term]	0.0071119	1	1	2	P53814	P53814 [512-520]		0	1143.67	0.963	33.69		100	R.VNSPGTLAR.L
FALSE	[K].MGSIFDREDQASPR.[A]	1xOxidation [M1]; 1xTMT6plex [N-Term]	0.00966706	1	1	2	P53814	P53814 [718-731]		1	1853.9	0.852	22.92		100	K.MGSIFDREDQASPR.A
High	P08670	Vimentin OS=Homo sapiens OX=9606 GN=VIM PE=1 SV=4	151.588	59	27	72	25	466	53.6	5.12	225.31	27	7431	VIM	5792.2	9360.5	5520.3	6077.5	11100.5	7893.3
Checked	Annotated Sequence	Modifications	Qvality q-value	# Protein Groups	# Proteins	# PSMs	Master Protein Accessions	Positions in Master Proteins	Modifications in Master Proteins	# Missed Cleavages	Theo. MH+ [Da]	Abundance Ratio: (HO) / (WT)	Abundances (Grouped) CV [%]: HO	Quan Info	Channel Occupancy [%]	Sequence in Protein
FALSE	[R].MFGGPGTASRPSSSR.[S]	1xTMT6plex [N-Term]	0.00030973	1	1	1	P08670	P08670 [14-28]		0	1723.87	0.857	9.53		100	R.MFGGPGTASRPSSSR.S
FALSE	[R].ISLPLPNFSSLNLR.[E]	1xTMT6plex [N-Term]	0.00030973	1	1	1	P08670	P08670 [411-424]		0	1800.06	0.513	7.99		100	R.ISLPLPNFSSLNLR.E
FALSE	[R].QDVDNASLAR.[L]	1xTMT6plex [N-Term]	0.00030973	1	1	2	P08670	P08670 [208-217]		0	1317.7	0.555	6.96		100	R.QDVDNASLAR.L
FALSE	[R].KVESLQEEIAFLK.[K]	2xTMT6plex [K1; K13]; 1xTMT6plex [N-Term]	0.00030973	1	1	2	P08670	P08670 [223-235]		1	2221.34	0.556	5.9		100	R.KVESLQEEIAFLK.K
FALSE	[R].LQDEIQNMK.[E]	1xTMT6plex [K9]; 1xTMT6plex [N-Term]	0.00030973	1	1	4	P08670	P08670 [365-373]		0	1576.88	0.551	0.67		100	R.LQDEIQNMK.E
FALSE	[R].LGDLYEEEMR.[E]	1xTMT6plex [N-Term]	0.00030973	1	1	1	P08670	P08670 [146-155]		0	1483.73	0.66	13.88		100	R.LGDLYEEEMR.E
FALSE	[R].LGDLYEEEMR.[E]	1xOxidation [M9]; 1xTMT6plex [N-Term]	0.00030973	1	1	2	P08670	P08670 [146-155]		0	1499.72	0.788	0.77		100	R.LGDLYEEEMR.E
FALSE	[K].ILLAELEQLK.[G]	1xTMT6plex [K10]; 1xTMT6plex [N-Term]	0.00030973	1	1	3	P08670	P08670 [130-139]		0	1628.04	0.606	12.99		100	K.ILLAELEQLK.G
FALSE	[R].TYSLGSALRPSTSR.[S]	1xTMT6plex [N-Term]	0.00030973	1	1	1	P08670	P08670 [37-50]		0	1724.95	0.88	3.41		100	R.TYSLGSALRPSTSR.S
FALSE	[K].VELQELNDR.[F]	1xTMT6plex [N-Term]	0.00030973	1	2	4	P08670	P08670 [105-113]		0	1344.73	0.548	5.17		100	K.VELQELNDR.F
FALSE	[K].VESLQEEIAFLK.[K]	1xTMT6plex [K12]; 1xTMT6plex [N-Term]	0.00030973	1	1	2	P08670	P08670 [224-235]		0	1864.08	0.603	3.1		100	K.VESLQEEIAFLK.K
FALSE	[R].QQYESVAAK.[N]	1xTMT6plex [K9]; 1xTMT6plex [N-Term]	0.00030973	1	1	1	P08670	P08670 [274-282]		0	1481.84			No Quan Values		R.QQYESVAAK.N
FALSE	[R].QVDQLTNDK.[A]	1xTMT6plex [K9]; 1xTMT6plex [N-Term]	0.00030973	1	1	4	P08670	P08670 [160-168]		0	1518.85	0.62	4.13		100	R.QVDQLTNDK.A
FALSE	[R].QVQSLTCEVDALK.[G]	1xCarbamidomethyl [C7]; 1xTMT6plex [K13]; 1xTMT6plex [N-Term]	0.00030973	1	1	6	P08670	P08670 [322-334]		0	1949.08	0.76	11.27		100	R.QVQSLTCEVDALK.G
FALSE	[R].SLYASSPGGVYATR.[S]	1xTMT6plex [N-Term]	0.00030973	1	1	1	P08670	P08670 [51-64]		0	1657.87	0.817	26.35		100	R.SLYASSPGGVYATR.S
FALSE	[RK].EYQDLLNVK.[M]	1xTMT6plex [K9]; 1xTMT6plex [N-Term]	0.00030973	1	6	4	P08670	P08670 [382-390]		0	1579.91	0.55	9.98		100	R.EYQDLLNVK.M
FALSE	[K].FADLSEAANR.[N]	1xTMT6plex [N-Term]	0.00030973	1	1	4	P08670	P08670 [295-304]		0	1322.69	0.587	4.57		100	K.FADLSEAANR.N
FALSE	[R].ETNLDSLPLVDTHSK.[R]	1xTMT6plex [K15]; 1xTMT6plex [N-Term]	0.00030973	1	1	3	P08670	P08670 [425-439]		0	2127.17	0.772	5.06		100	R.ETNLDSLPLVDTHSK.R
FALSE	[R].EEAENTLQSFR.[Q]	1xTMT6plex [N-Term]	0.00030973	1	1	5	P08670	P08670 [197-207]		0	1552.78	0.562	3.96		100	R.EEAENTLQSFR.Q
FALSE	[R].EMEENFAVEAANYQDTIGR.[L]	1xTMT6plex [N-Term]	0.00030973	1	1	1	P08670	P08670 [346-364]		0	2416.13	0.892	7.48		100	R.EMEENFAVEAANYQDTIGR.L
FALSE	[R].EMEENFAVEAANYQDTIGR.[L]	1xOxidation [M2]; 1xTMT6plex [N-Term]	0.00030973	1	1	1	P08670	P08670 [346-364]		0	2432.12	0.675	21.17		100	R.EMEENFAVEAANYQDTIGR.L
FALSE	[R].DNLAEDIMR.[L]	1xTMT6plex [N-Term]	0.00030973	1	1	1	P08670	P08670 [176-184]		0	1305.67	1.057	37.92		100	R.DNLAEDIMR.L
FALSE	[R].SVSSSSYR.[R]	1xTMT6plex [N-Term]	0.000568404	1	1	2	P08670	P08670 [5-12]		0	1101.57	0.657	4.2		100	R.SVSSSSYR.R
FALSE	[KR].LLEGEESR.[LI]	1xTMT6plex [N-Term]	0.000568404	3	6	1	P08670; P41219; P05787	P08670 [403-410]; P41219 [399-406]; P05787 [394-401]		0	1161.63	0.582	8.08	Shared	100	K.LLEGEESR.I
FALSE	[R].FANYIDK.[V]	1xTMT6plex [K7]; 1xTMT6plex [N-Term]	0.000568404	1	1	3	P08670	P08670 [114-120]		0	1328.76	0.598	14.21		100	R.FANYIDK.V
FALSE	[R].LQDEIQNMK.[E]	1xOxidation [M8]; 1xTMT6plex [K9]; 1xTMT6plex [N-Term]	0.000568404	1	1	1	P08670	P08670 [365-373]		0	1592.87	0.574	2.08		100	R.LQDEIQNMK.E
FALSE	[R].FLEQQNK.[VLAIM]	1xTMT6plex [K7]; 1xTMT6plex [N-Term]	0.000568404	7	18	6	P08670; P04259; P02538; P12035; P05787; Q8N1N4; P13647	P08670 [123-129]; P04259 [183-189]; P02538 [183-189]; P12035 [218-224]; P05787 [111-117]; Q8N1N4 [131-137]; P13647 [188-194]		0	1364.79	0.773	53.81	Shared	100	R.FLEQQNK.I
FALSE	[K].LQEEMLQR.[E]	1xTMT6plex [N-Term]	0.000568404	1	1	2	P08670	P08670 [189-196]		0	1275.69	0.652	19.67		100	K.LQEEMLQR.E
FALSE	[K].QESTEYR.[R]	1xTMT6plex [N-Term]	0.00115152	1	1	1	P08670	P08670 [314-320]		0	1141.57	0.869	12.23		100	K.QESTEYR.R
FALSE	[R].SYVTTSTR.[T]	1xTMT6plex [N-Term]	0.00164966	1	1	2	P08670	P08670 [29-36]		0	1143.62	0.613	6.75		100	R.SYVTTSTR.T
High	P63010	AP-2 complex subunit beta OS=Homo sapiens OX=9606 GN=AP2B1 PE=1 SV=1	148.114	34	28	53	28	937	104.5	5.38	151.71	28	163	AP2B1	5460.2	6483.6	4458.7	6686.7	8318.2	5053.7
Checked	Annotated Sequence	Modifications	Qvality q-value	# Protein Groups	# Proteins	# PSMs	Master Protein Accessions	Positions in Master Proteins	Modifications in Master Proteins	# Missed Cleavages	Theo. MH+ [Da]	Abundance Ratio: (HO) / (WT)	Abundances (Grouped) CV [%]: HO	Quan Info	Channel Occupancy [%]	Sequence in Protein
FALSE	[K].MEPLNNLQVAVK.[N]	1xTMT6plex [K12]; 1xTMT6plex [N-Term]	0.00030973	1	2	2	P63010	P63010 [797-808]		0	1814.06	0.824	30.96		100	K.MEPLNNLQVAVK.N
FALSE	[K].MEPLNNLQVAVK.[N]	1xOxidation [M1]; 1xTMT6plex [K12]; 1xTMT6plex [N-Term]	0.00030973	1	2	6	P63010	P63010 [797-808]		0	1830.06	0.92	10.11		100	K.MEPLNNLQVAVK.N
FALSE	[R].NINLIVQK.[R]	1xTMT6plex [K8]; 1xTMT6plex [N-Term]	0.00030973	1	2	2	P63010	P63010 [305-312]		0	1399.9	0.86	20.75		100	R.NINLIVQK.R
FALSE	[K].LAPPLVTLLSGEPEVQYVALR.[N]	1xTMT6plex [N-Term]	0.00030973	1	1	1	P63010	P63010 [284-304]		0	2494.45	0.975	10.69		100	K.LAPPLVTLLSGEPEVQYVALR.N
FALSE	[R].LASQANIAQVLAELK.[E]	1xTMT6plex [K15]; 1xTMT6plex [N-Term]	0.00030973	1	2	1	P63010	P63010 [345-359]		0	2027.23	0.804	51.73		100	R.LASQANIAQVLAELK.E
FALSE	[K].KGEIFELK.[A]	2xTMT6plex [K1; K8]; 1xTMT6plex [N-Term]	0.00030973	1	2	4	P63010	P63010 [12-19]		1	1651.04	0.816	38.18		100	K.KGEIFELK.A
FALSE	[K].KPSETQELVQQVLSLATQDSDNPDLR.[D]	1xTMT6plex [K1]; 1xTMT6plex [N-Term]	0.00030973	1	1	1	P63010	P63010 [495-520]		0	3369.79			No Quan Values		K.KPSETQELVQQVLSLATQDSDNPDLR.D
FALSE	[R].LLSTDPVTAK.[E]	1xTMT6plex [K10]; 1xTMT6plex [N-Term]	0.00030973	1	1	3	P63010	P63010 [529-538]		0	1502.92	0.865	34.85		100	R.LLSTDPVTAK.E
FALSE	[K].LQNNNVYTIAK.[R]	1xTMT6plex [K11]; 1xTMT6plex [N-Term]	0.00030973	1	1	3	P63010	P63010 [868-878]		0	1736.01	0.816	32.62		100	K.LQNNNVYTIAK.R
FALSE	[R].IQPGNPNYTLSLK.[C]	1xTMT6plex [K13]; 1xTMT6plex [N-Term]	0.00030973	1	1	1	P63010	P63010 [905-917]		0	1903.11	0.784	54.49		100	R.IQPGNPNYTLSLK.C
FALSE	[K].YNDPIYVK.[L]	1xTMT6plex [K8]; 1xTMT6plex [N-Term]	0.00030973	1	2	2	P63010	P63010 [328-335]		0	1469.84	0.829	30.3		100	K.YNDPIYVK.L
FALSE	[K].VIAAMTVGK.[D]	1xTMT6plex [K9]; 1xTMT6plex [N-Term]	0.00030973	1	1	2	P63010	P63010 [37-45]		0	1347.84	0.771	30.47		100	K.VIAAMTVGK.D
FALSE	[K].VIAAMTVGK.[D]	1xOxidation [M5]; 1xTMT6plex [K9]; 1xTMT6plex [N-Term]	0.00030973	1	1	1	P63010	P63010 [37-45]		0	1363.84	0.9	15.15		100	K.VIAAMTVGK.D
FALSE	[K].TAAVCVAK.[L]	1xCarbamidomethyl [C5]; 1xTMT6plex [K8]; 1xTMT6plex [N-Term]	0.00030973	1	2	1	P63010	P63010 [140-147]		0	1277.77	0.855	12.87		100	K.TAAVCVAK.L
FALSE	[K].SQPDMAIMAVNSFVK.[D]	1xTMT6plex [K15]; 1xTMT6plex [N-Term]	0.00030973	1	1	1	P63010	P63010 [79-93]		0	2096.13	0.926	24.96		100	K.SQPDMAIMAVNSFVK.D
FALSE	[K].SQPDMAIMAVNSFVK.[D]	2xOxidation [M5; M8]; 1xTMT6plex [K15]; 1xTMT6plex [N-Term]	0.00030973	1	1	1	P63010	P63010 [79-93]		0	2128.12			No Quan Values		K.SQPDMAIMAVNSFVK.D
FALSE	[K].EYATEVDVDFVR.[K]	1xTMT6plex [N-Term]	0.00030973	1	2	2	P63010	P63010 [360-371]		0	1671.84	0.898	29.01		100	K.EYATEVDVDFVR.K
FALSE	[K].DVSSLFPDVVNCMQTDNLELK.[K]	1xCarbamidomethyl [C12]; 1xTMT6plex [K21]; 1xTMT6plex [N-Term]	0.00030973	1	1	1	P63010	P63010 [46-66]		0	2882.47	1.241	36.68		100	K.DVSSLFPDVVNCMQTDNLELK.K
FALSE	[K].ECHLNADTVSSK.[L]	1xCarbamidomethyl [C2]; 1xTMT6plex [K12]; 1xTMT6plex [N-Term]	0.00030973	1	1	2	P63010	P63010 [856-867]		0	1818.94	0.929	29.72		100	K.ECHLNADTVSSK.L
FALSE	[R].APEVSQYIYQVYDSILK.[N]	1xTMT6plex [K17]; 1xTMT6plex [N-Term]	0.00030973	1	1	1	P63010	P63010 [920-936]		0	2474.36	0.97	25.17		100	R.APEVSQYIYQVYDSILK.N
FALSE	[R].EAQSICER.[V]	1xCarbamidomethyl [C6]; 1xTMT6plex [N-Term]	0.00030973	1	2	2	P63010	P63010 [236-243]		0	1221.61	1.112	15.88		100	R.EAQSICER.V
FALSE	[R].CVSTLLDLIQTK.[V]	1xCarbamidomethyl [C1]; 1xTMT6plex [K12]; 1xTMT6plex [N-Term]	0.00030973	1	2	1	P63010	P63010 [391-402]		0	1849.09	1	24.38		100	R.CVSTLLDLIQTK.V
FALSE	[K].DCEDPNPLIR.[A]	1xCarbamidomethyl [C2]; 1xTMT6plex [N-Term]	0.00030973	1	2	1	P63010	P63010 [94-103]		0	1457.73	0.851	10.61		100	K.DCEDPNPLIR.A
FALSE	[K].AVWLPAVK.[A]	1xTMT6plex [K8]; 1xTMT6plex [N-Term]	0.00030973	1	1	1	P63010	P63010 [712-719]		0	1341.87	0.794	32.1		100	K.AVWLPAVK.A
FALSE	[K].DIPNENELQFQIK.[E]	1xTMT6plex [K13]; 1xTMT6plex [N-Term]	0.00030973	1	1	3	P63010	P63010 [843-855]		0	2046.13	0.87	39.79		100	K.DIPNENELQFQIK.E
FALSE	[K].AELNNEK.[K]	1xTMT6plex [K7]; 1xTMT6plex [N-Term]	0.000568404	1	1	2	P63010	P63010 [20-26]		0	1275.73	0.762	40.84		100	K.AELNNEK.K
FALSE	[K].GEIFELK.[A]	1xTMT6plex [K7]; 1xTMT6plex [N-Term]	0.0008677	1	2	1	P63010	P63010 [13-19]		0	1293.78	0.772	25.55		100	K.GEIFELK.A
FALSE	[K].VNYVVQEAIVVIR.[D]	1xTMT6plex [N-Term]	0.00139174	1	1	1	P63010	P63010 [403-415]		0	1731.04	0.843	33.55		100	K.VNYVVQEAIVVIR.D
FALSE	[K].FLELLPK.[D]	1xTMT6plex [K7]; 1xTMT6plex [N-Term]	0.00357681	1	1	1	P63010	P63010 [266-272]		0	1317.85	0.882	22.96		100	K.FLELLPK.D
FALSE	[K].RPEILK.[QH]	1xTMT6plex [K6]; 1xTMT6plex [N-Term]	0.00573188	1	2	1	P63010	P63010 [313-318]		0	1213.8	0.77	30.87		100	K.RPEILK.Q
FALSE	[K].ITEYLCEPLRK.[C]	1xCarbamidomethyl [C6]; 1xTMT6plex [K11]; 1xTMT6plex [N-Term]	0.00947302	1	2	1	P63010	P63010 [118-128]		1	1880.07	0.651	17.27		100	K.ITEYLCEPLRK.C
High	O95425	Supervillin OS=Homo sapiens OX=9606 GN=SVIL PE=1 SV=2	147.228	20	38	54	38	2214	247.6	6.98	151.98	38	6840	SVIL	3508.9	4561.4	3027.2	4067.2	5339	3897
Checked	Annotated Sequence	Modifications	Qvality q-value	# Protein Groups	# Proteins	# PSMs	Master Protein Accessions	Positions in Master Proteins	Modifications in Master Proteins	# Missed Cleavages	Theo. MH+ [Da]	Abundance Ratio: (HO) / (WT)	Abundances (Grouped) CV [%]: HO	Quan Info	Channel Occupancy [%]	Sequence in Protein
FALSE	[K].MNAQGNLDLR.[D]	1xTMT6plex [N-Term]	0.00030973	1	1	1	O95425	O95425 [1023-1032]		0	1360.72	0.783	13.1		100	K.MNAQGNLDLR.D
FALSE	[K].MSSNSNFSEVTLAGLASK.[E]	1xOxidation [M1]; 1xTMT6plex [K18]; 1xTMT6plex [N-Term]	0.00030973	1	1	1	O95425	O95425 [1398-1415]		0	2317.21	1.021	12.46		100	K.MSSNSNFSEVTLAGLASK.E
FALSE	[R].NSPELASESVTQR.[R]	1xTMT6plex [N-Term]	0.00030973	1	1	1	O95425	O95425 [318-330]		0	1646.85	0.565	5.01		100	R.NSPELASESVTQR.R
FALSE	[K].VEVENVMK.[R]	1xTMT6plex [K8]; 1xTMT6plex [N-Term]	0.00030973	1	1	1	O95425	O95425 [1041-1048]		0	1405.81	0.752	23.64		100	K.VEVENVMK.R
FALSE	[K].TPTGEGLLDSPSK.[T]	1xTMT6plex [K13]; 1xTMT6plex [N-Term]	0.00030973	1	1	2	O95425	O95425 [1111-1123]		0	1759.98	0.87	8.47		100	K.TPTGEGLLDSPSK.T
FALSE	[R].TSMVVLNVNK.[A]	1xTMT6plex [K10]; 1xTMT6plex [N-Term]	0.00030973	1	1	1	O95425	O95425 [1910-1919]		0	1562.93	0.716	31.26		100	R.TSMVVLNVNK.A
FALSE	[R].TQPITSAER.[K]	1xTMT6plex [N-Term]	0.00030973	1	1	3	O95425	O95425 [657-665]		0	1231.68	0.718	22.51		100	R.TQPITSAER.K
FALSE	[R].YQTQPVTLGEVEQVQSGK.[L]	1xTMT6plex [K18]; 1xTMT6plex [N-Term]	0.00030973	1	1	1	O95425	O95425 [850-867]		0	2449.33			No Quan Values		R.YQTQPVTLGEVEQVQSGK.L
FALSE	[R].SAEGPGLPTGVER.[E]	1xTMT6plex [N-Term]	0.00030973	1	1	2	O95425	O95425 [620-632]		0	1498.81	0.664	12.69		100	R.SAEGPGLPTGVER.E
FALSE	[R].RGQELSATR.[Q]	1xTMT6plex [N-Term]	0.00030973	1	1	1	O95425	O95425 [207-215]		1	1246.71	0.742	2.18		100	R.RGQELSATR.Q
FALSE	[R].SVNLTEQNSNNSAVPYK.[R]	1xTMT6plex [K17]; 1xTMT6plex [N-Term]	0.00030973	1	1	2	O95425	O95425 [1425-1441]		0	2323.23	0.762	17.15		100	R.SVNLTEQNSNNSAVPYK.R
FALSE	[K].SQAWQPLVEGSENK.[G]	1xTMT6plex [K14]; 1xTMT6plex [N-Term]	0.00030973	1	1	2	O95425	O95425 [928-941]		0	2031.09	0.742	8.7		100	K.SQAWQPLVEGSENK.G
FALSE	[K].EVMKPDDDETFAK.[F]	2xTMT6plex [K4; K13]; 1xTMT6plex [N-Term]	0.00030973	1	1	1	O95425	O95425 [1298-1310]		0	2212.18	0.631	37.83		100	K.EVMKPDDDETFAK.F
FALSE	[K].DSEGDTPSLINWPSR.[V]	1xTMT6plex [N-Term]	0.00030973	1	1	1	O95425	O95425 [289-303]		0	1902.94	0.782	31.08		100	K.DSEGDTPSLINWPSR.V
FALSE	[K].FSSSIENSDSPVR.[S]	1xTMT6plex [N-Term]	0.00030973	1	1	2	O95425	O95425 [911-923]		0	1653.83	0.679	31.33		100	K.FSSSIENSDSPVR.S
FALSE	[K].ELENVAQPPQAPHQPTER.[T]	1xTMT6plex [N-Term]	0.00030973	1	1	2	O95425	O95425 [492-509]		0	2270.17	0.812	12.36		100	K.ELENVAQPPQAPHQPTER.T
FALSE	[K].ASELATLIQTK.[R]	1xTMT6plex [K11]; 1xTMT6plex [N-Term]	0.00030973	1	1	3	O95425	O95425 [1496-1506]		0	1632.99	0.786	24.9		100	K.ASELATLIQTK.R
FALSE	[K].ELAEQGEPDSSTLSLAEK.[L]	1xTMT6plex [K18]; 1xTMT6plex [N-Term]	0.00030973	1	1	2	O95425	O95425 [801-818]		0	2362.24	0.726	14.36		100	K.ELAEQGEPDSSTLSLAEK.L
FALSE	[R].EDLLQEYTEQR.[L]	1xTMT6plex [N-Term]	0.00030973	1	1	1	O95425	O95425 [1372-1382]		0	1652.83	0.974	2.18		100	R.EDLLQEYTEQR.L
FALSE	[K].ENFSNVSLR.[S]	1xTMT6plex [N-Term]	0.00030973	1	1	2	O95425	O95425 [1416-1424]		0	1294.7	0.85	34.31		100	K.ENFSNVSLR.S
FALSE	[K].GTSALMTVELDEER.[G]	1xTMT6plex [N-Term]	0.00030973	1	1	1	O95425	O95425 [1827-1840]		0	1779.9	0.687	7.41		100	K.GTSALMTVELDEER.G
FALSE	[R].AAEFGEPTSEQTGTAAGK.[T]	1xTMT6plex [K18]; 1xTMT6plex [N-Term]	0.00030973	1	1	1	O95425	O95425 [1055-1072]		0	2210.13	0.737	4.02		100	R.AAEFGEPTSEQTGTAAGK.T
FALSE	[R].DASSLYPGTETMGLR.[T]	1xTMT6plex [N-Term]	0.00030973	1	1	1	O95425	O95425 [162-176]		0	1826.92	0.669	28.73		100	R.DASSLYPGTETMGLR.T
FALSE	[R].GAANDSTQFTVAGR.[M]	1xTMT6plex [N-Term]	0.00030973	1	1	1	O95425	O95425 [1204-1217]		0	1623.83	0.696	33.26		100	R.GAANDSTQFTVAGR.M
FALSE	[R].GAQVQVLQGK.[E]	1xTMT6plex [K10]; 1xTMT6plex [N-Term]	0.00030973	1	1	1	O95425	O95425 [1841-1850]		0	1485.92	0.713	26.11		100	R.GAQVQVLQGK.E
FALSE	[R].LTEHNETILFK.[E]	1xTMT6plex [K11]; 1xTMT6plex [N-Term]	0.000568404	1	1	2	O95425	O95425 [1666-1676]		0	1803.04	0.785	21.8		100	R.LTEHNETILFK.E
FALSE	[K].LSQPVSK.[A]	1xTMT6plex [K7]; 1xTMT6plex [N-Term]	0.000568404	1	1	2	O95425	O95425 [825-831]		0	1216.77	0.687	16.02		100	K.LSQPVSK.A
FALSE	[K].GLASPTAITPVASPICGK.[T]	1xCarbamidomethyl [C16]; 1xTMT6plex [K18]; 1xTMT6plex [N-Term]	0.000568404	1	1	1	O95425	O95425 [1222-1239]		0	2198.26	0.927	16.64		100	K.GLASPTAITPVASPICGK.T
FALSE	[K].NPGELAQHK.[E]	1xTMT6plex [K9]; 1xTMT6plex [N-Term]	0.000568404	1	1	3	O95425	O95425 [1692-1700]		0	1451.84	0.719	6.28		100	K.NPGELAQHK.E
FALSE	[R].EYGETESK.[R]	1xTMT6plex [K8]; 1xTMT6plex [N-Term]	0.000568404	1	1	1	O95425	O95425 [946-953]		0	1400.73	0.631	11.25		100	R.EYGETESK.R
FALSE	[R].TCAGESK.[D]	1xCarbamidomethyl [C2]; 1xTMT6plex [K7]; 1xTMT6plex [N-Term]	0.00115152	1	1	1	O95425	O95425 [177-183]		0	1210.65	0.599	27.08		100	R.TCAGESK.D
FALSE	[R].ELELPSSK.[T]	1xTMT6plex [K8]; 1xTMT6plex [N-Term]	0.00139174	1	1	1	O95425	O95425 [570-577]		0	1360.81			No Quan Values		R.ELELPSSK.T
FALSE	[R].LLEEDTPR.[Y]	1xTMT6plex [N-Term]	0.00139174	1	1	1	O95425	O95425 [34-41]		0	1201.66	0.719	27.23		100	R.LLEEDTPR.Y
FALSE	[K].TEGPYGEISMLDTK.[V]	1xTMT6plex [K14]; 1xTMT6plex [N-Term]	0.00164966	1	1	1	O95425	O95425 [578-591]		0	1999.05	0.957	8.63		100	K.TEGPYGEISMLDTK.V
FALSE	[R].LMLLQIK.[G]	1xTMT6plex [K7]; 1xTMT6plex [N-Term]	0.00237856	1	1	1	O95425	O95425 [1443-1449]		0	1316.87	0.877	41.13		100	R.LMLLQIK.G
FALSE	[R].DSSFTEVPR.[S]	1xTMT6plex [N-Term]	0.00237856	1	1	1	O95425	O95425 [236-244]		0	1266.65	0.877	27.97		100	R.DSSFTEVPR.S
FALSE	[K].DQTNEGK.[E]	1xTMT6plex [K7]; 1xTMT6plex [N-Term]	0.00616547	1	1	1	O95425	O95425 [794-800]		0	1249.68	0.908	4.27		100	K.DQTNEGK.E
FALSE	[K].VSVAQLR.[S]	1xTMT6plex [N-Term]	0.00797596	1	1	1	O95425	O95425 [592-598]		0	1001.63	0.6	23.23		100	K.VSVAQLR.S
High	P46821	Microtubule-associated protein 1B OS=Homo sapiens OX=9606 GN=MAP1B PE=1 SV=2	146.019	17	33	55	32	2468	270.5	4.81	164.57	33	4131	MAP1B	4724.5	5188.6	3882.5	5749.2	5735.7	4693.7
Checked	Annotated Sequence	Modifications	Qvality q-value	# Protein Groups	# Proteins	# PSMs	Master Protein Accessions	Positions in Master Proteins	Modifications in Master Proteins	# Missed Cleavages	Theo. MH+ [Da]	Abundance Ratio: (HO) / (WT)	Abundances (Grouped) CV [%]: HO	Quan Info	Channel Occupancy [%]	Sequence in Protein
FALSE	[K].MSISEGTVSDK.[S]	1xTMT6plex [K11]; 1xTMT6plex [N-Term]	0.00030973	1	1	1	P46821	P46821 [1519-1529]		0	1611.87	0.926	20.03		100	K.MSISEGTVSDK.S
FALSE	[K].QGVDDIEK.[F]	1xTMT6plex [K8]; 1xTMT6plex [N-Term]	0.00030973	1	1	1	P46821	P46821 [918-925]		0	1361.77	0.882	29.37		100	K.QGVDDIEK.F
FALSE	[K].NLISPDLGVVFLNVPENLK.[N]	1xTMT6plex [K19]; 1xTMT6plex [N-Term]	0.00030973	1	1	1	P46821	P46821 [348-366]		0	2539.49	1.063	14.33		100	K.NLISPDLGVVFLNVPENLK.N
FALSE	[K].KTDDVEAMSSQPALALDER.[K]	1xTMT6plex [K1]; 1xTMT6plex [N-Term]	0.00030973	1	1	3	P46821	P46821 [1477-1495]		1	2534.32	0.971	35.14		100	K.KTDDVEAMSSQPALALDER.K
FALSE	[K].LGDVSPTQIDVSQFGSFK.[E]	1xTMT6plex [K18]; 1xTMT6plex [N-Term]	0.00030973	1	1	1	P46821	P46821 [1497-1514]		0	2383.29	1.031	34.75		100	K.LGDVSPTQIDVSQFGSFK.E
FALSE	[R].TPDTSTYCYETAEK.[I]	1xCarbamidomethyl [C8]; 1xTMT6plex [K14]; 1xTMT6plex [N-Term]	0.00030973	1	1	1	P46821	P46821 [2034-2047]		0	2124.02			No Quan Values		R.TPDTSTYCYETAEK.I
FALSE	[R].TSDVGGYYYEK.[I]	1xTMT6plex [K11]; 1xTMT6plex [N-Term]	0.00030973	1	1	1	P46821	P46821 [1898-1908]		0	1739.89	0.926	49.35		100	R.TSDVGGYYYEK.I
FALSE	[K].VQSLEGEK.[L]	1xTMT6plex [K8]; 1xTMT6plex [N-Term]	0.00030973	1	1	2	P46821	P46821 [1770-1777]		0	1347.79	0.846	33.61		100	K.VQSLEGEK.L
FALSE	[K].VNHVEKPPK.[V]	2xTMT6plex [K6; K9]; 1xTMT6plex [N-Term]	0.00030973	1	1	1	P46821	P46821 [571-579]		0	1735.08	0.893	14.58		100	K.VNHVEKPPK.V
FALSE	[R].SDVLETVVLINPSDEAVSTEVR.[L]	1xTMT6plex [N-Term]	0.00030973	1	1	1	P46821	P46821 [104-125]		0	2601.38	0.97	11.91		100	R.SDVLETVVLINPSDEAVSTEVR.L
FALSE	[K].TATAGPGTTK.[T]	1xTMT6plex [K10]; 1xTMT6plex [N-Term]	0.00030973	1	1	1	P46821	P46821 [2334-2343]		0	1362.8	0.613	9.7		100	K.TATAGPGTTK.T
FALSE	[R].SVGNTIDPVILFQK.[M]	1xTMT6plex [K14]; 1xTMT6plex [N-Term]	0.00030973	1	1	2	P46821	P46821 [401-414]		0	1989.18	1.059	24.88		100	R.SVGNTIDPVILFQK.M
FALSE	[R].SVNFSLTPNEIK.[V]	1xTMT6plex [K12]; 1xTMT6plex [N-Term]	0.00030973	1	1	4	P46821	P46821 [1276-1287]		0	1807.04	0.901	26.57		100	R.SVNFSLTPNEIK.V
FALSE	[K].STDFAPIK.[E]	1xTMT6plex [K8]; 1xTMT6plex [N-Term]	0.00030973	1	1	2	P46821	P46821 [1462-1469]		0	1336.79	0.896	34.2		100	K.STDFAPIK.E
FALSE	[K].SSTPLSEAK.[K]	1xTMT6plex [K9]; 1xTMT6plex [N-Term]	0.00030973	1	1	2	P46821	P46821 [742-750]		0	1377.8	0.891	30.4		100	K.SSTPLSEAK.K
FALSE	[R].DVMSDETNNEETESPSQEFVNITK.[Y]	1xTMT6plex [K24]; 1xTMT6plex [N-Term]	0.00030973	1	1	1	P46821	P46821 [1141-1164]		0	3201.51	0.798	45.33		100	R.DVMSDETNNEETESPSQEFVNITK.Y
FALSE	[K].ETEPVEAYVIQK.[E]	1xTMT6plex [K12]; 1xTMT6plex [N-Term]	0.00030973	1	1	3	P46821	P46821 [869-880]		0	1864.05	0.908	24.09		100	K.ETEPVEAYVIQK.E
FALSE	[R].FSPEVPGQK.[I]	1xTMT6plex [K9]; 1xTMT6plex [N-Term]	0.00030973	1	1	3	P46821	P46821 [90-98]		0	1446.84	0.904	28.59		100	R.FSPEVPGQK.I
FALSE	[R].AVLDALLEGK.[A]	1xTMT6plex [K10]; 1xTMT6plex [N-Term]	0.00030973	2	2	1	P46821; P78559	P46821 [2400-2409]; P78559 [2735-2744]		0	1486.92	0.773	21.63	Shared	100	R.AVLDALLEGK.A
FALSE	[K].DSISAVSSEK.[V]	1xTMT6plex [K10]; 1xTMT6plex [N-Term]	0.00030973	1	1	2	P46821	P46821 [1241-1250]		0	1480.83	0.971	24.25		100	K.DSISAVSSEK.V
FALSE	[K].ASTTLDIK.[D]	1xTMT6plex [K8]; 1xTMT6plex [N-Term]	0.00030973	1	1	2	P46821	P46821 [1233-1240]		0	1306.8	0.804	26.79		100	K.ASTTLDIK.D
FALSE	[K].GPAESPDEGITTTEGEGECEQTPEELEPVEK.[Q]	1xCarbamidomethyl [C19]; 1xTMT6plex [K31]; 1xTMT6plex [N-Term]	0.00030973	1	1	1	P46821	P46821 [887-917]		0	3802.77	1.416	2.54		100	K.GPAESPDEGITTTEGEGECEQTPEELEPVEK.Q
FALSE	[K].AEEVDVTK.[D]	1xTMT6plex [K8]; 1xTMT6plex [N-Term]	0.00030973	1	1	1	P46821	P46821 [845-852]		0	1348.77	0.887	28.69		100	K.AEEVDVTK.D
FALSE	[R].DAYCSEVK.[A]	1xCarbamidomethyl [C4]; 1xTMT6plex [K8]; 1xTMT6plex [N-Term]	0.00030973	1	1	1	P46821	P46821 [1225-1232]		0	1429.74	0.984	25.74		100	R.DAYCSEVK.A
FALSE	[K].DLTGQVPTPVVK.[Q]	1xTMT6plex [K12]; 1xTMT6plex [N-Term]	0.00030973	1	1	3	P46821	P46821 [520-531]		0	1712.04	0.998	32.15		100	K.DLTGQVPTPVVK.Q
FALSE	[R].GAESPFEEK.[S]	1xTMT6plex [K9]; 1xTMT6plex [N-Term]	0.00030973	1	1	3	P46821	P46821 [1424-1432]		0	1451.78	0.889	36.02		100	R.GAESPFEEK.S
FALSE	[R].DLSTPGLEK.[D]	1xTMT6plex [K9]; 1xTMT6plex [N-Term]	0.000568404	1	1	2	P46821	P46821 [1850-1858]		0	1417.83	1.019	38.25		100	R.DLSTPGLEK.D
FALSE	[K].QLGAQSPGR.[E]	1xTMT6plex [N-Term]	0.000568404	1	1	1	P46821	P46821 [1071-1079]		0	1142.65	0.946	22.43		100	K.QLGAQSPGR.E
FALSE	[K].EDFGQEK.[K]	1xTMT6plex [K7]; 1xTMT6plex [N-Term]	0.0008677	1	1	1	P46821	P46821 [1470-1476]		0	1310.7	0.923	29.8		100	K.EDFGQEK.K
FALSE	[K].EETPEVTK.[V]	1xTMT6plex [K8]; 1xTMT6plex [N-Term]	0.00218929	1	1	1	P46821	P46821 [563-570]		0	1390.78	0.863	21.19		100	K.EETPEVTK.V
FALSE	[K].VSAEAEVAPVSPEVTQEVVEEHCASPEDK.[T]	1xCarbamidomethyl [C23]; 1xTMT6plex [K29]; 1xTMT6plex [N-Term]	0.00237856	1	1	1	P46821	P46821 [1288-1316]		0	3580.77			No Quan Values		K.VSAEAEVAPVSPEVTQEVVEEHCASPEDK.T
FALSE	[K].QPLATQK.[D]	1xTMT6plex [K7]; 1xTMT6plex [N-Term]	0.00380261	1	1	2	P46821	P46821 [513-519]		0	1243.78	0.909	28.66		100	K.QPLATQK.D
FALSE	[K].HLDFLK.[QE]	1xTMT6plex [K6]; 1xTMT6plex [N-Term]	0.00573188	1	3	2	P46821	P46821 [507-512]		0	1230.76	0.995	12.22		100	K.HLDFLK.Q
High	Q9UM54	Unconventional myosin-VI OS=Homo sapiens OX=9606 GN=MYO6 PE=1 SV=4	144.522	27	32	55	32	1294	149.6	8.53	170.05	32	4646	MYO6	5305.2	5646.9	4393	6406.7	7012.1	4547.5
Checked	Annotated Sequence	Modifications	Qvality q-value	# Protein Groups	# Proteins	# PSMs	Master Protein Accessions	Positions in Master Proteins	Modifications in Master Proteins	# Missed Cleavages	Theo. MH+ [Da]	Abundance Ratio: (HO) / (WT)	Abundances (Grouped) CV [%]: HO	Quan Info	Channel Occupancy [%]	Sequence in Protein
FALSE	[K].MSQSIIVSGESGAGK.[T]	1xTMT6plex [K15]; 1xTMT6plex [N-Term]	0.00030973	1	1	1	Q9UM54	Q9UM54 [143-157]		0	1909.05	0.892	16.34		100	K.MSQSIIVSGESGAGK.T
FALSE	[K].MSQSIIVSGESGAGK.[T]	1xOxidation [M1]; 1xTMT6plex [K15]; 1xTMT6plex [N-Term]	0.00030973	1	1	1	Q9UM54	Q9UM54 [143-157]		0	1925.04	1.017	11.82		100	K.MSQSIIVSGESGAGK.T
FALSE	[K].IYSSEAIK.[S]	1xTMT6plex [K8]; 1xTMT6plex [N-Term]	0.00030973	1	1	4	Q9UM54	Q9UM54 [106-113]		0	1368.81	0.961	35.15		100	K.IYSSEAIK.S
FALSE	[K].NLEISIDTLMAK.[I]	1xOxidation [M10]; 1xTMT6plex [K12]; 1xTMT6plex [N-Term]	0.00030973	1	1	1	Q9UM54	Q9UM54 [873-884]		0	1822.04	0.957	14.86		100	K.NLEISIDTLMAK.I
FALSE	[K].LVGILDILDEENR.[L]	1xTMT6plex [N-Term]	0.00030973	1	1	2	Q9UM54	Q9UM54 [522-534]		0	1727.97	1.082	34.41		100	K.LVGILDILDEENR.L
FALSE	[R].IVEANPLLEAFGNAK.[T]	1xTMT6plex [K15]; 1xTMT6plex [N-Term]	0.00030973	1	1	3	Q9UM54	Q9UM54 [182-196]		0	2044.18	1.011	9.4		100	R.IVEANPLLEAFGNAK.T
FALSE	[R].QMELHPDKPPILLVAGK.[D]	2xTMT6plex [K8; K17]; 1xTMT6plex [N-Term]	0.00030973	1	1	1	Q9UM54	Q9UM54 [1214-1230]		0	2573.55	0.918	31.77		100	R.QMELHPDKPPILLVAGK.D
FALSE	[R].NIRDDEGFIIR.[H]	1xTMT6plex [N-Term]	0.00030973	1	1	1	Q9UM54	Q9UM54 [570-580]		1	1576.86	0.989	16.35		100	R.NIRDDEGFIIR.H
FALSE	[R].LCAGASEDIR.[E]	1xCarbamidomethyl [C2]; 1xTMT6plex [N-Term]	0.00030973	1	1	1	Q9UM54	Q9UM54 [251-260]		0	1320.68	0.925	28.56		100	R.LCAGASEDIR.E
FALSE	[R].IAQSEAELISDEAQADLALR.[R]	1xTMT6plex [N-Term]	0.00030973	1	1	2	Q9UM54	Q9UM54 [1016-1035]		0	2372.25	0.942	60.45		100	R.IAQSEAELISDEAQADLALR.R
FALSE	[K].LQQFFNER.[I]	1xTMT6plex [N-Term]	0.00030973	1	1	1	Q9UM54	Q9UM54 [480-487]		0	1310.71	1.084	4.83		100	K.LQQFFNER.I
FALSE	[R].IQAEVEAQLAR.[Q]	1xTMT6plex [N-Term]	0.00030973	1	1	1	Q9UM54	Q9UM54 [981-991]		0	1456.83	0.821	43.58		100	R.IQAEVEAQLAR.Q
FALSE	[K].IGLDDEEK.[L]	1xTMT6plex [K8]; 1xTMT6plex [N-Term]	0.00030973	1	1	2	Q9UM54	Q9UM54 [327-334]		0	1376.77	0.876	24.11		100	K.IGLDDEEK.L
FALSE	[K].TQLNLLLDK.[L]	1xTMT6plex [K9]; 1xTMT6plex [N-Term]	0.00030973	1	1	2	Q9UM54	Q9UM54 [649-657]		0	1515.95	0.844	33.78		100	K.TQLNLLLDK.L
FALSE	[R].YLTESYGTGQDIDDR.[I]	1xTMT6plex [N-Term]	0.00030973	1	1	1	Q9UM54	Q9UM54 [167-181]		0	1961.93	0.825	50.12		100	R.YLTESYGTGQDIDDR.I
FALSE	[R].VMLTTAGGTK.[G]	1xTMT6plex [K10]; 1xTMT6plex [N-Term]	0.00030973	1	1	1	Q9UM54	Q9UM54 [394-403]		0	1436.85	0.901	16.71		100	R.VMLTTAGGTK.G
FALSE	[R].VMLTTAGGTK.[G]	1xOxidation [M2]; 1xTMT6plex [K10]; 1xTMT6plex [N-Term]	0.00030973	1	1	1	Q9UM54	Q9UM54 [394-403]		0	1452.85	0.87	39.82		100	R.VMLTTAGGTK.G
FALSE	[K].TFLALINQVFPAEEDSK.[K]	1xTMT6plex [K17]; 1xTMT6plex [N-Term]	0.00030973	1	1	1	Q9UM54	Q9UM54 [40-56]		0	2380.32	1.129	16.32		100	K.TFLALINQVFPAEEDSK.K
FALSE	[K].STMMTQEQIQK.[E]	1xTMT6plex [K11]; 1xTMT6plex [N-Term]	0.00030973	1	1	1	Q9UM54	Q9UM54 [887-897]		0	1782.95	0.826	0.4		100	K.STMMTQEQIQK.E
FALSE	[K].ALGLNENDYK.[F]	1xTMT6plex [K10]; 1xTMT6plex [N-Term]	0.00030973	1	1	3	Q9UM54	Q9UM54 [741-750]		0	1594.88	0.846	37.45		100	K.ALGLNENDYK.F
FALSE	[K].FAEFDQIMK.[S]	1xTMT6plex [K9]; 1xTMT6plex [N-Term]	0.00030973	1	1	1	Q9UM54	Q9UM54 [763-771]		0	1586.87	0.948	47.56		100	K.FAEFDQIMK.S
FALSE	[R].ELFESSTNNNK.[D]	1xTMT6plex [K11]; 1xTMT6plex [N-Term]	0.00030973	1	1	2	Q9UM54	Q9UM54 [619-629]		0	1740.92	0.97	32.93		100	R.ELFESSTNNNK.D
FALSE	[K].EEQELYQK.[E]	1xTMT6plex [K8]; 1xTMT6plex [N-Term]	0.00030973	1	1	2	Q9UM54	Q9UM54 [491-498]		0	1524.83	1.094	10.1		100	K.EEQELYQK.E
FALSE	[K].DDMEMCELNLEETGLTR.[K]	1xCarbamidomethyl [C6]; 1xTMT6plex [N-Term]	0.00030973	1	1	1	Q9UM54	Q9UM54 [1231-1247]		0	2285.03	0.779	22.02		100	K.DDMEMCELNLEETGLTR.K
FALSE	[R].GPAVLATK.[A]	1xTMT6plex [K8]; 1xTMT6plex [N-Term]	0.00030973	1	1	1	Q9UM54	Q9UM54 [1069-1076]		0	1214.79	0.845	29.22		100	R.GPAVLATK.A
FALSE	[K].DPLLDDHGDFIR.[M]	1xTMT6plex [N-Term]	0.00030973	1	1	4	Q9UM54	Q9UM54 [308-319]		0	1641.84	0.925	18.8		100	K.DPLLDDHGDFIR.M
FALSE	[R].STGASFIR.[C]	1xTMT6plex [N-Term]	0.000568404	1	1	1	Q9UM54	Q9UM54 [660-667]		0	1067.6	0.819	38.23		100	R.STGASFIR.C
FALSE	[K].FVEIHFNEK.[S]	1xTMT6plex [K9]; 1xTMT6plex [N-Term]	0.000568404	1	1	3	Q9UM54	Q9UM54 [209-217]		0	1620.91	0.861	29.52		100	K.FVEIHFNEK.S
FALSE	[R].IQEEMEK.[E]	1xTMT6plex [K7]; 1xTMT6plex [N-Term]	0.000568404	1	1	2	Q9UM54	Q9UM54 [929-935]		0	1364.75	0.854	33.89		100	R.IQEEMEK.E
FALSE	[K].EYDALVK.[S]	1xTMT6plex [K7]; 1xTMT6plex [N-Term]	0.000568404	1	1	2	Q9UM54	Q9UM54 [898-904]		0	1295.76	0.864	35.02		100	K.EYDALVK.S
FALSE	[K].FAEFDQIMK.[S]	1xOxidation [M8]; 1xTMT6plex [K9]; 1xTMT6plex [N-Term]	0.00192392	1	1	1	Q9UM54	Q9UM54 [763-771]		0	1602.86	1.071	15.59		100	K.FAEFDQIMK.S
FALSE	[K].VEQANNAR.[D]	1xTMT6plex [N-Term]	0.00237856	1	1	1	Q9UM54	Q9UM54 [413-420]		0	1130.61	0.919	5.45		100	K.VEQANNAR.D
FALSE	[R].IPFIRPADQYK.[D]	1xTMT6plex [K11]; 1xTMT6plex [N-Term]	0.00258338	1	1	1	Q9UM54	Q9UM54 [1182-1192]		0	1806.07	1.442	25.77		100	R.IPFIRPADQYK.D
FALSE	[K].SSEELLSALQK.[K]	1xTMT6plex [K11]; 1xTMT6plex [N-Term]	0.00357681	1	1	1	Q9UM54	Q9UM54 [905-915]		0	1662.97	0.951	23.88		100	K.SSEELLSALQK.K
FALSE	[R].GAEILPR.[Q]	1xTMT6plex [N-Term]	0.00813383	1	1	1	Q9UM54	Q9UM54 [1250-1256]		0	984.604	0.93	31.71		100	R.GAEILPR.Q
High	P13647	Keratin, type II cytoskeletal 5 OS=Homo sapiens OX=9606 GN=KRT5 PE=1 SV=3	144.438	41	28	87	16	590	62.3	7.74	214.81	28	3852	KRT5	8324.1	8088	12033.5	5758.2	8160.5	8016.1
Checked	Annotated Sequence	Modifications	Qvality q-value	# Protein Groups	# Proteins	# PSMs	Master Protein Accessions	Positions in Master Proteins	Modifications in Master Proteins	# Missed Cleavages	Theo. MH+ [Da]	Abundance Ratio: (HO) / (WT)	Abundances (Grouped) CV [%]: HO	Quan Info	Channel Occupancy [%]	Sequence in Protein
FALSE	[KR].NKYEDEINK.[HR]	2xTMT6plex [K2; K9]; 1xTMT6plex [N-Term]	0.00030973	5	7	1	P04264; P04259; P02538; P05787; P13647	P04264 [268-276]; P04259 [251-259]; P02538 [251-259]; P05787 [177-185]; P13647 [256-264]		1	1840.04	0.712	38.11	Shared	100	K.NKYEDEINK.R
FALSE	[R].NLDLDSIIAEVK.[A]	1xTMT6plex [K12]; 1xTMT6plex [N-Term]	0.00030973	4	7	7	P35908; P04259; P02538; P13647	P35908 [342-353]; P04259 [327-338]; P02538 [327-338]; P13647 [332-343]		0	1788.05	1.065	49.27	Shared	100	R.NLDLDSIIAEVK.A
FALSE	[R].ISISTSGGSFR.[N]	1xTMT6plex [N-Term]	0.00030973	1	1	2	P13647	P13647 [74-84]		0	1340.74	1.023	13.87		100	R.ISISTSGGSFR.N
FALSE	[R].QLDSIVGER.[G]	1xTMT6plex [N-Term]	0.00030973	2	3	5	P02538; P13647	P02538 [224-232]; P13647 [229-237]		0	1245.7	1.01	66.24	Shared	100	R.QLDSIVGER.G
FALSE	[R].NMQDLVEDFK.[N]	1xTMT6plex [K10]; 1xTMT6plex [N-Term]	0.00030973	1	1	2	P13647	P13647 [246-255]		0	1696.9	1.139	50.77		100	R.NMQDLVEDFK.N
FALSE	[K].LAELEEALQK.[A]	1xTMT6plex [K10]; 1xTMT6plex [N-Term]	0.00030973	1	1	6	P13647	P13647 [432-441]		0	1601.95	1.162	90		100	K.LAELEEALQK.A
FALSE	[R].QNLEPLFEQYINNLR.[R]	1xTMT6plex [N-Term]	0.00030973	3	4	2	P04259; P02538; P13647	P04259 [208-222]; P02538 [208-222]; P13647 [213-227]		0	2120.13	1.103	16.75	Shared	100	R.QNLEPLFEQYINNLR.R
FALSE	[R].TTAENEFVMLK.[K]	1xTMT6plex [K11]; 1xTMT6plex [N-Term]	0.00030973	1	1	2	P13647	P13647 [266-276]		0	1740.96	1.298	48.32		100	R.TTAENEFVMLK.K
FALSE	[R].TTAENEFVMLK.[K]	1xOxidation [M9]; 1xTMT6plex [K11]; 1xTMT6plex [N-Term]	0.00030973	1	1	4	P13647	P13647 [266-276]		0	1756.96	1.127	65.1		100	R.TTAENEFVMLK.K
FALSE	[K].WTLLQEQGTK.[T]	1xTMT6plex [K10]; 1xTMT6plex [N-Term]	0.00030973	3	4	1	P04259; P02538; P13647	P04259 [195-204]; P02538 [195-204]; P13647 [200-209]		0	1661.96	1.073	30.23	Shared	100	K.WTLLQEQGTK.T
FALSE	[KR].YEDEINK.[HR]	1xTMT6plex [K7]; 1xTMT6plex [N-Term]	0.00030973	7	12	7	P35908; P04264; P04259; P02538; P12035; P05787; P13647	P35908 [268-274]; P04264 [270-276]; P04259 [253-259]; P02538 [253-259]; P12035 [290-296]; P05787 [179-185]; P13647 [258-264]		0	1368.74	0.882	62.49	Shared	100	K.YEDEINK.R
FALSE	[K].YEELQQTAGR.[H]	1xTMT6plex [N-Term]	0.00030973	1	1	2	P13647	P13647 [365-374]		0	1423.74	0.918	33.84		100	K.YEELQQTAGR.H
FALSE	[R].SFSTASAITPSVSR.[T]	1xTMT6plex [N-Term]	0.00030973	1	1	2	P13647	P13647 [16-29]		0	1639.89	1.12	13.04		100	R.SFSTASAITPSVSR.T
FALSE	[R].SGGGGGGGFGR.[V]	1xTMT6plex [N-Term]	0.00030973	1	1	3	P13647	P13647 [38-48]		0	1094.55	0.978	17.01		100	R.SGGGGGGGFGR.V
FALSE	[R].QNLEPLFEQYINNLRR.[Q]	1xTMT6plex [N-Term]	0.00030973	3	4	1	P04259; P02538; P13647	P04259 [208-223]; P02538 [208-223]; P13647 [213-228]		1	2276.23	1.006	40.97	Shared	100	R.QNLEPLFEQYINNLRR.Q
FALSE	[R].SLYNLGGSK.[R]	1xTMT6plex [K9]; 1xTMT6plex [N-Term]	0.00030973	1	1	1	P13647	P13647 [64-72]		0	1396.82	0.981	45.71		100	R.SLYNLGGSK.R
FALSE	[K].AQYEEIANR.[S]	1xTMT6plex [N-Term]	0.00030973	1	1	3	P13647	P13647 [344-352]		0	1322.69	0.998	42.94		100	K.AQYEEIANR.S
FALSE	[R].GLGVGFGSGGGSSSSVK.[F]	1xTMT6plex [K17]; 1xTMT6plex [N-Term]	0.00030973	1	1	1	P13647	P13647 [560-576]		0	1898.04	1.295	51.02		100	R.GLGVGFGSGGGSSSSVK.F
FALSE	[R].TSFTSVSR.[S]	1xTMT6plex [N-Term]	0.000568404	1	1	1	P13647	P13647 [30-37]		0	1113.61	1.237	34.08		100	R.TSFTSVSR.S
FALSE	[K].DVDAAYMNK.[V]	1xOxidation [M7]; 1xTMT6plex [K9]; 1xTMT6plex [N-Term]	0.000568404	3	6	7	P04259; P02538; P13647	P04259 [273-281]; P02538 [273-281]; P13647 [278-286]		0	1500.78	1.078	73.4	Shared	100	K.DVDAAYMNK.V
FALSE	[R].SLYNLGGSKR.[I]	1xTMT6plex [K9]; 1xTMT6plex [N-Term]	0.000568404	1	1	1	P13647	P13647 [64-73]		1	1552.92	0.952	41.89		100	R.SLYNLGGSKR.I
FALSE	[R].AEIDNVK.[K]	1xTMT6plex [K7]; 1xTMT6plex [N-Term]	0.000568404	1	1	2	P13647	P13647 [398-404]		0	1246.74	0.972	60.26		100	R.AEIDNVK.K
FALSE	[R].FLEQQNK.[VLAIM]	1xTMT6plex [K7]; 1xTMT6plex [N-Term]	0.000568404	7	18	6	P08670; P04259; P02538; P12035; P05787; Q8N1N4; P13647	P08670 [123-129]; P04259 [183-189]; P02538 [183-189]; P12035 [218-224]; P05787 [111-117]; Q8N1N4 [131-137]; P13647 [188-194]		0	1364.79	0.773	53.81	Shared	100	R.FLEQQNK.V
FALSE	[KR].YEDEINKR.[T]	1xTMT6plex [K7]; 1xTMT6plex [N-Term]	0.000568404	7	11	4	P35908; P04264; P04259; P02538; P12035; P05787; P13647	P35908 [268-275]; P04264 [270-277]; P04259 [253-260]; P02538 [253-260]; P12035 [290-297]; P05787 [179-186]; P13647 [258-265]		1	1524.84	0.85	50.12	Shared	100	K.YEDEINKR.T
FALSE	[K].FASFIDK.[V]	1xTMT6plex [K7]; 1xTMT6plex [N-Term]	0.00139174	8	18	2	Q86Y46; P35908; P04259; P02538; P12035; P19013; P05787; P13647	Q86Y46 [143-149]; P35908 [189-195]; P04259 [174-180]; P02538 [174-180]; P12035 [209-215]; P19013 [162-168]; P05787 [102-108]; P13647 [179-185]		0	1285.76	1.076	55.1	Shared	100	K.FASFIDK.V
FALSE	[R].EYQELMNTK.[L]	1xOxidation [M6]; 1xTMT6plex [K9]; 1xTMT6plex [N-Term]	0.00139174	1	1	2	P13647	P13647 [452-460]		0	1629.86	0.808	47.75		100	R.EYQELMNTK.L
FALSE	[K].VDALMDEINFMK.[M]	1xOxidation [M11]; 1xTMT6plex [K12]; 1xTMT6plex [N-Term]	0.00139174	1	1	1	P13647	P13647 [293-304]		0	1900	1.038	25.71		100	K.VDALMDEINFMK.M
FALSE	[R].NMQDLVEDFK.[N]	1xOxidation [M2]; 1xTMT6plex [K10]; 1xTMT6plex [N-Term]	0.00164966	1	1	1	P13647	P13647 [246-255]		0	1712.89	1.067	41.01		100	R.NMQDLVEDFK.N
FALSE	[K].VDALMDEINFMK.[M]	2xOxidation [M5; M11]; 1xTMT6plex [K12]; 1xTMT6plex [N-Term]	0.00237856	1	1	1	P13647	P13647 [293-304]		0	1915.99	1.029	45.38		100	K.VDALMDEINFMK.M
FALSE	[K].VDALMDEINFMK.[M]	1xTMT6plex [K12]; 1xTMT6plex [N-Term]	0.00404001	1	1	1	P13647	P13647 [293-304]		0	1884			No Quan Values		K.VDALMDEINFMK.M
FALSE	[R].QSSVSFR.[S]	1xTMT6plex [N-Term]	0.00502099	1	1	2	P13647	P13647 [4-10]		0	1039.57	1.086	28.77		100	R.QSSVSFR.S
FALSE	[R].GELAIK.[D]	1xTMT6plex [K6]; 1xTMT6plex [N-Term]	0.00755645	3	6	8	P05787; Q8N1N4; P13647	P05787 [342-347]; Q8N1N4 [364-369]; P13647 [421-426]		0	1088.71	0.877	35.28	Shared	100	R.GELALK.D
High	Q7Z406	Myosin-14 OS=Homo sapiens OX=9606 GN=MYH14 PE=1 SV=2	142.235	9	20	562	6	1995	227.7	5.6	1911.85	20	79784	MYH14	2764.2	2580.7	2246.8	3400.7	3121.2	2133.8
Checked	Annotated Sequence	Modifications	Qvality q-value	# Protein Groups	# Proteins	# PSMs	Master Protein Accessions	Positions in Master Proteins	Modifications in Master Proteins	# Missed Cleavages	Theo. MH+ [Da]	Abundance Ratio: (HO) / (WT)	Abundances (Grouped) CV [%]: HO	Quan Info	Channel Occupancy [%]	Sequence in Protein
FALSE	[R].NCAAYLK.[L]	1xCarbamidomethyl [C2]; 1xTMT6plex [K7]; 1xTMT6plex [N-Term]	0.00030973	4	4	20	P35580; P35749; P35579; Q7Z406	P35580 [822-828]; P35749 [822-828]; P35579 [815-821]; Q7Z406 [839-845]		0	1297.73	0.986	42.13	Shared	100	R.NCAAYLK.L
FALSE	[KR].QLLQANPILEAFGNAK.[T]	1xTMT6plex [K16]; 1xTMT6plex [N-Term]	0.00030973	3	3	24	P35749; P35579; Q7Z406	P35749 [217-232]; P35579 [210-225]; Q7Z406 [237-252]		0	2185.27	1.089	15.13	Shared	100	R.QLLQANPILEAFGNAK.T
FALSE	[KR].KEEELQAALAR.[LVA]	1xTMT6plex [K1]; 1xTMT6plex [N-Term]	0.00030973	3	3	44	P35749; P35579; Q7Z406	P35749 [1088-1098]; P35579 [1081-1091]; Q7Z406 [1105-1115]		1	1716.01	0.975	35.31	Shared	100	R.KEEELQAALAR.A
FALSE	[KR].KFDQLLAEEK.[SNTA]	2xTMT6plex [K1; K10]; 1xTMT6plex [N-Term]	0.00030973	4	4	107	P35580; P35749; P35579; Q7Z406	P35580 [1452-1461]; P35749 [1452-1461]; P35579 [1445-1454]; Q7Z406 [1469-1478]		1	1908.14	0.985	38.57	Shared	100	R.KFDQLLAEEK.A
FALSE	[R].YEILTPNAIPK.[G]	1xTMT6plex [K11]; 1xTMT6plex [N-Term]	0.00030973	2	2	12	P35580; Q7Z406	P35580 [728-738]; Q7Z406 [745-755]		0	1717.03	0.869	38.17	Shared	100	R.YEILTPNAIPK.G
FALSE	[K].VKPLLQVTR.[Q]	1xTMT6plex [K2]; 1xTMT6plex [N-Term]	0.00030973	3	3	1	P35580; P35749; Q7Z406	P35580 [841-849]; P35749 [841-849]; Q7Z406 [858-866]		0	1512	0.8	49.67	Shared	100	K.VKPLLQVTR.Q
FALSE	[R].QRYEILTPNAIPK.[G]	1xTMT6plex [K13]; 1xTMT6plex [N-Term]	0.00030973	2	2	2	P35580; Q7Z406	P35580 [726-738]; Q7Z406 [743-755]		1	2001.19	0.617	45.01	Shared	100	R.QRYEILTPNAIPK.G
FALSE	[K].FDQLLAEEK.[SNTA]	1xTMT6plex [K9]; 1xTMT6plex [N-Term]	0.00030973	4	4	23	P35580; P35749; P35579; Q7Z406	P35580 [1453-1461]; P35749 [1453-1461]; P35579 [1446-1454]; Q7Z406 [1470-1478]		0	1550.88	1.047	32.1	Shared	100	K.FDQLLAEEK.A
FALSE	[R].AGVLAQLEEER.[D]	1xTMT6plex [N-Term]	0.00030973	1	1	1	Q7Z406	Q7Z406 [789-799]		0	1443.8	0.884	38.65		100	R.AGVLAQLEEER.D
FALSE	[R].EDQSILCTGESGAGK.[T]	1xCarbamidomethyl [C7]; 1xTMT6plex [K15]; 1xTMT6plex [N-Term]	0.00030973	4	4	55	P35580; P35749; P35579; Q7Z406	P35580 [170-184]; P35749 [170-184]; P35579 [166-180]; Q7Z406 [190-204]		0	2010.02	1.119	31.96	Shared	100	R.EDQSILCTGESGAGK.T
FALSE	[K].EEELQAALAR.[LVA]	1xTMT6plex [N-Term]	0.00030973	3	3	20	P35749; P35579; Q7Z406	P35749 [1089-1098]; P35579 [1082-1091]; Q7Z406 [1106-1115]		0	1358.75	1.052	27.94	Shared	100	K.EEELQAALAR.A
FALSE	[K].EQADFAIEALAK.[A]	1xTMT6plex [K12]; 1xTMT6plex [N-Term]	0.00030973	2	2	374	P35579; Q7Z406	P35579 [408-419]; Q7Z406 [434-445]		0	1763.99	1.039	24.37	Shared	100	K.EQADFALEALAK.A
FALSE	[R].CNGVLEGIR.[I]	1xCarbamidomethyl [C1]; 1xTMT6plex [N-Term]	0.00030973	4	13	27	P35580; P35749; P35579; Q7Z406	P35580 [701-709]; P35749 [701-709]; P35579 [694-702]; Q7Z406 [718-726]		0	1246.68	0.925	40.35	Shared	100	R.CNGVLEGIR.I
FALSE	[R].DLGEELEALR.[G]	1xTMT6plex [N-Term]	0.000568404	1	1	8	Q7Z406	Q7Z406 [1160-1169]		0	1373.75	0.978	18.77		100	R.DLGEELEALR.G
FALSE	[K].KFEEDLLLLEDQNSK.[L]	2xTMT6plex [K1; K15]; 1xTMT6plex [N-Term]	0.000568404	1	1	1	Q7Z406	Q7Z406 [999-1013]		1	2508.42	1.085	20.92		100	K.KFEEDLLLLEDQNSK.L
FALSE	[R].NTDQATMPDNTAAQK.[L]	1xTMT6plex [K15]; 1xTMT6plex [N-Term]	0.000568404	1	1	1	Q7Z406	Q7Z406 [385-399]		0	2064.04	0.745	2.27		100	R.NTDQATMPDNTAAQK.L
FALSE	[R].LVLDQLR.[C]	1xTMT6plex [N-Term]	0.000568404	1	1	13	Q7Z406	Q7Z406 [711-717]		0	1085.69	1.171	34.18		100	R.LVLDQLR.C
FALSE	[R].RDLGEELEALR.[G]	1xTMT6plex [N-Term]	0.00139174	1	1	2	Q7Z406	Q7Z406 [1159-1169]		1	1529.85	1.063	44.18		100	R.RDLGEELEALR.G
FALSE	[R].TVGQLYK.[E]	1xTMT6plex [K7]; 1xTMT6plex [N-Term]	0.00139174	4	4	13	P35580; P35749; P35579; Q7Z406	P35580 [652-658]; P35749 [652-658]; P35579 [645-651]; Q7Z406 [669-675]		0	1266.78	0.97	40.57	Shared	100	R.TVGQLYK.E
FALSE	[RK].NDNSSR.[F]	1xTMT6plex [N-Term]	0.00813383	8	24	1	O00159; P35580; P35749; Q9Y4I1; P35579; O43795; Q7Z406; O94832	O00159 [192-197]; P35580 [236-241]; P35749 [236-241]; Q9Y4I1 [214-219]; P35579 [229-234]; O43795 [160-165]; Q7Z406 [256-261]; O94832 [156-161]		0	921.459	0.893	42.41	Shared	100	K.NDNSSR.F
High	P27816	Microtubule-associated protein 4 OS=Homo sapiens OX=9606 GN=MAP4 PE=1 SV=3	135.433	29	30	55	30	1152	120.9	5.43	150.33	30	4134	MAP4	5150.8	5729	4184.8	6339.7	6861.3	4783.6
Checked	Annotated Sequence	Modifications	Qvality q-value	# Protein Groups	# Proteins	# PSMs	Master Protein Accessions	Positions in Master Proteins	Modifications in Master Proteins	# Missed Cleavages	Theo. MH+ [Da]	Abundance Ratio: (HO) / (WT)	Abundances (Grouped) CV [%]: HO	Quan Info	Channel Occupancy [%]	Sequence in Protein
FALSE	[K].NVVLPTETEVAPAK.[D]	1xTMT6plex [K14]; 1xTMT6plex [N-Term]	0.00030973	1	1	2	P27816	P27816 [333-346]		0	1926.13	0.975	29.57		100	K.NVVLPTETEVAPAK.D
FALSE	[R].LATNTSAPDLK.[N]	1xTMT6plex [K11]; 1xTMT6plex [N-Term]	0.00030973	1	1	3	P27816	P27816 [923-933]		0	1588.93	0.816	20.54		100	R.LATNTSAPDLK.N
FALSE	[K].HVPGGGNVQIQNK.[K]	1xTMT6plex [K13]; 1xTMT6plex [N-Term]	0.00030973	1	1	2	P27816	P27816 [1016-1028]		0	1806.04	0.822	39.58		100	K.HVPGGGNVQIQNK.K
FALSE	[R].KPESNAVTK.[T]	2xTMT6plex [K1; K9]; 1xTMT6plex [N-Term]	0.00030973	1	1	2	P27816	P27816 [968-976]		0	1661.02	0.881	31.16		100	R.KPESNAVTK.T
FALSE	[K].TTTLSGTAPAAGVVPSR.[V]	1xTMT6plex [N-Term]	0.00030973	1	1	2	P27816	P27816 [872-888]		0	1815.02	1.006	14.63		100	K.TTTLSGTAPAAGVVPSR.V
FALSE	[K].TTTAAAVASTGPSSR.[S]	1xTMT6plex [N-Term]	0.00030973	1	1	3	P27816	P27816 [810-824]		0	1606.86	0.994	21.78		100	K.TTTAAAVASTGPSSR.S
FALSE	[K].TTDMAPSK.[E]	1xTMT6plex [K8]; 1xTMT6plex [N-Term]	0.00030973	1	1	2	P27816	P27816 [247-254]		0	1308.72	0.902	23.85		100	K.TTDMAPSK.E
FALSE	[K].TKPLATTQPAK.[T]	2xTMT6plex [K2; K11]; 1xTMT6plex [N-Term]	0.00030973	1	1	1	P27816	P27816 [701-711]		0	1843.16	0.839	37.19		100	K.TKPLATTQPAK.T
FALSE	[K].QPAPTTIGGLNK.[K]	1xTMT6plex [K12]; 1xTMT6plex [N-Term]	0.00030973	1	1	2	P27816	P27816 [727-738]		0	1654.99	0.855	27.39		100	K.QPAPTTIGGLNK.K
FALSE	[K].TAGPIASAQK.[Q]	1xTMT6plex [K10]; 1xTMT6plex [N-Term]	0.00030973	1	1	3	P27816	P27816 [977-986]		0	1401.85	0.875	27.52		100	K.TAGPIASAQK.Q
FALSE	[K].STSTSSMK.[K]	1xTMT6plex [K8]; 1xTMT6plex [N-Term]	0.00030973	1	1	1	P27816	P27816 [863-870]		0	1286.7	0.889	36.93		100	K.STSTSSMK.K
FALSE	[K].SVPADLSRPK.[S]	1xTMT6plex [K10]; 1xTMT6plex [N-Term]	0.00030973	1	1	1	P27816	P27816 [853-862]		0	1527.93	0.929	39.25		100	K.SVPADLSRPK.S
FALSE	[K].TDYIPLLDVDEK.[T]	1xTMT6plex [K12]; 1xTMT6plex [N-Term]	0.00030973	1	1	1	P27816	P27816 [45-56]		0	1879.05	0.901	44.55		100	K.TDYIPLLDVDEK.T
FALSE	[K].ATPMPSRPSTTPFIDK.[K]	1xTMT6plex [K16]; 1xTMT6plex [N-Term]	0.00030973	1	1	1	P27816	P27816 [891-906]		0	2204.21	0.851	34.55		100	K.ATPMPSRPSTTPFIDK.K
FALSE	[K].ALPLEAEVAPVK.[D]	1xTMT6plex [K12]; 1xTMT6plex [N-Term]	0.00030973	1	1	3	P27816	P27816 [465-476]		0	1695.05	0.972	33.6		100	K.ALPLEAEVAPVK.D
FALSE	[K].ETEMALAK.[D]	1xTMT6plex [K8]; 1xTMT6plex [N-Term]	0.00030973	1	1	1	P27816	P27816 [255-262]		0	1350.77	0.918	35.01		100	K.ETEMALAK.D
FALSE	[K].DVTPPPETEVVLIK.[N]	1xTMT6plex [K14]; 1xTMT6plex [N-Term]	0.00030973	1	1	1	P27816	P27816 [519-532]		0	1995.18	0.896	28.38		100	K.DVTPPPETEVVLIK.N
FALSE	[R].EAQTLDSQIQETSI.[-]	1xTMT6plex [N-Term]	0.00030973	1	1	2	P27816	P27816 [1139-1152]		0	1791.92	0.783	25.85		100	R.EAQTLDSQIQETSI.-
FALSE	[R].DFIATLEAEAFDDVVGETVGK.[T]	1xTMT6plex [K21]; 1xTMT6plex [N-Term]	0.00030973	1	1	1	P27816	P27816 [24-44]		0	2684.41	1.057	4.88		100	R.DFIATLEAEAFDDVVGETVGK.T
FALSE	[K].DMELPTEK.[E]	1xTMT6plex [K8]; 1xTMT6plex [N-Term]	0.00030973	1	1	3	P27816	P27816 [305-312]		0	1420.78	1	28.56		100	K.DMELPTEK.E
FALSE	[K].STQTVAK.[T]	1xTMT6plex [K7]; 1xTMT6plex [N-Term]	0.000568404	1	1	3	P27816	P27816 [803-809]		0	1192.73	0.923	26.3		100	K.STQTVAK.T
FALSE	[K].VGSTENIK.[H]	1xTMT6plex [K8]; 1xTMT6plex [N-Term]	0.000568404	1	1	2	P27816	P27816 [939-946]		0	1305.78	0.848	25.83		100	K.VGSTENIK.H
FALSE	[K].LDVTLAK.[D]	1xTMT6plex [K7]; 1xTMT6plex [N-Term]	0.00139174	1	1	2	P27816	P27816 [284-290]		0	1217.79	0.917	25.55		100	K.LDVTLAK.D
FALSE	[K].DMAQLPETEIAPAK.[D]	1xOxidation [M2]; 1xTMT6plex [K14]; 1xTMT6plex [N-Term]	0.00139174	1	1	1	P27816	P27816 [477-490]		0	1988.08	0.786	19.71		100	K.DMAQLPETEIAPAK.D
FALSE	[K].TQPTSLPK.[Q]	1xTMT6plex [K8]; 1xTMT6plex [N-Term]	0.00237856	1	1	2	P27816	P27816 [719-726]		0	1329.81	1.09	40.33		100	K.TQPTSLPK.Q
FALSE	[K].ELPPSPEK.[K]	1xTMT6plex [K8]; 1xTMT6plex [N-Term]	0.00258338	1	1	1	P27816	P27816 [692-699]		0	1354.8	0.864	20.69		100	K.ELPPSPEK.K
FALSE	[K].TEVALAK.[D]	1xTMT6plex [K7]; 1xTMT6plex [N-Term]	0.00258338	1	1	2	P27816	P27816 [270-276]		0	1189.76	0.968	28.02		100	K.TEVALAK.D
FALSE	[R].SPSTLLPK.[K]	1xTMT6plex [K8]; 1xTMT6plex [N-Term]	0.00333498	1	1	1	P27816	P27816 [825-832]		0	1300.82			No Quan Values		R.SPSTLLPK.K
FALSE	[K].KPTAIK.[T]	2xTMT6plex [K1; K6]; 1xTMT6plex [N-Term]	0.00404001	1	1	1	P27816	P27816 [833-838]		0	1344.92	0.875	24.42		100	K.KPTAIK.T
FALSE	[K].ATPMPSRPSTTPFIDK.[K]	1xOxidation [M4]; 1xTMT6plex [K16]; 1xTMT6plex [N-Term]	0.00502099	1	1	2	P27816	P27816 [891-906]		0	2220.21	0.917	18.83		100	K.ATPMPSRPSTTPFIDK.K
FALSE	[K].MDLAPSK.[D]	1xTMT6plex [K7]; 1xTMT6plex [N-Term]	0.00734391	1	1	1	P27816	P27816 [362-368]; [388-394]		0	1219.71	0.764	35.36		100	K.MDLAPSK.D; K.MDLAPSK.D
High	Q9P0K7	Ankycorbin OS=Homo sapiens OX=9606 GN=RAI14 PE=1 SV=2	135.042	32	31	63	31	980	110	6.21	186.48	31	26064	RAI14	6684.5	7407.7	5657.8	7897.6	8850	6200.4
Checked	Annotated Sequence	Modifications	Qvality q-value	# Protein Groups	# Proteins	# PSMs	Master Protein Accessions	Positions in Master Proteins	Modifications in Master Proteins	# Missed Cleavages	Theo. MH+ [Da]	Abundance Ratio: (HO) / (WT)	Abundances (Grouped) CV [%]: HO	Quan Info	Channel Occupancy [%]	Sequence in Protein
FALSE	[K].LQSSLESEVSVLASK.[L]	1xTMT6plex [K15]; 1xTMT6plex [N-Term]	0.00030973	1	1	1	Q9P0K7	Q9P0K7 [792-806]		0	2035.17	0.829	36.87		100	K.LQSSLESEVSVLASK.L
FALSE	[K].LSENAGIQSLLLSK.[I]	1xTMT6plex [K14]; 1xTMT6plex [N-Term]	0.00030973	1	1	1	Q9P0K7	Q9P0K7 [227-240]		0	1931.16	0.866	12.52		100	K.LSENAGIQSLLLSK.I
FALSE	[K].QDLQNALEESER.[N]	1xTMT6plex [N-Term]	0.00030973	1	1	4	Q9P0K7	Q9P0K7 [537-548]		0	1660.83	0.971	26.96		100	K.QDLQNALEESER.N
FALSE	[K].QLQVELQSR.[R]	1xTMT6plex [N-Term]	0.00030973	1	1	1	Q9P0K7	Q9P0K7 [454-462]		0	1329.77	0.917	15.03		100	K.QLQVELQSR.R
FALSE	[R].IQQLQEILQDLQK.[R]	1xTMT6plex [K13]; 1xTMT6plex [N-Term]	0.00030973	1	1	1	Q9P0K7	Q9P0K7 [431-443]		0	2055.22	1.984	70		100	R.IQQLQEILQDLQK.R
FALSE	[R].LLQAVENGDAEK.[V]	1xTMT6plex [K12]; 1xTMT6plex [N-Term]	0.00030973	1	1	2	Q9P0K7	Q9P0K7 [23-34]		0	1744.98	0.933	22.08		100	R.LLQAVENGDAEK.V
FALSE	[R].VTEEEINVLK.[Q]	1xTMT6plex [K10]; 1xTMT6plex [N-Term]	0.00030973	1	1	3	Q9P0K7	Q9P0K7 [527-536]		0	1631.96	0.851	30.95		100	R.VTEEEINVLK.Q
FALSE	[K].YQEAQEEIMK.[L]	1xTMT6plex [K10]; 1xTMT6plex [N-Term]	0.00030973	1	1	3	Q9P0K7	Q9P0K7 [601-610]		0	1726.91	0.907	30.77		100	K.YQEAQEEIMK.L
FALSE	[K].VLNELTQLK.[Q]	1xTMT6plex [K9]; 1xTMT6plex [N-Term]	0.00030973	1	1	3	Q9P0K7	Q9P0K7 [709-717]		0	1515.95	0.831	32.94		100	K.VLNELTQLK.Q
FALSE	[K].VHSEVVQIR.[S]	1xTMT6plex [N-Term]	0.00030973	1	1	3	Q9P0K7	Q9P0K7 [817-825]		0	1295.76	1.164	4.82		100	K.VHSEVVQIR.S
FALSE	[K].SDTNEWNK.[N]	1xTMT6plex [K8]; 1xTMT6plex [N-Term]	0.00030973	1	1	1	Q9P0K7	Q9P0K7 [11-18]		0	1451.75	0.796	28.57		100	K.SDTNEWNK.N
FALSE	[R].QSQQLEALQQQVK.[Q]	1xTMT6plex [K13]; 1xTMT6plex [N-Term]	0.00030973	1	1	3	Q9P0K7	Q9P0K7 [914-926]		0	1986.14	0.983	22.06		100	R.QSQQLEALQQQVK.Q
FALSE	[K].QVSELSQLYK.[E]	1xTMT6plex [K10]; 1xTMT6plex [N-Term]	0.00030973	1	1	2	Q9P0K7	Q9P0K7 [644-653]		0	1652.96	0.981	33.12		100	K.QVSELSQLYK.E
FALSE	[K].SQMTQEASDEAEDMK.[E]	1xOxidation [M14]; 1xTMT6plex [K15]; 1xTMT6plex [N-Term]	0.00030973	1	1	1	Q9P0K7	Q9P0K7 [617-631]		0	2174	0.929	4.4		100	K.SQMTQEASDEAEDMK.E
FALSE	[R].SITSTPLSGK.[E]	1xTMT6plex [K10]; 1xTMT6plex [N-Term]	0.00030973	1	1	1	Q9P0K7	Q9P0K7 [293-302]		0	1448.87	0.934	23.35		100	R.SITSTPLSGK.E
FALSE	[K].ESVFFAEPPFK.[A]	1xTMT6plex [K11]; 1xTMT6plex [N-Term]	0.00030973	1	1	3	Q9P0K7	Q9P0K7 [303-313]		0	1755.97	0.902	25.91		100	K.ESVFFAEPPFK.A
FALSE	[K].EQEVNELLQK.[F]	1xTMT6plex [K10]; 1xTMT6plex [N-Term]	0.00030973	1	1	2	Q9P0K7	Q9P0K7 [846-855]		0	1687.96	0.951	33.44		100	K.EQEVNELLQK.F
FALSE	[K].EALNSLSQLSYSTSSSK.[R]	1xTMT6plex [K17]; 1xTMT6plex [N-Term]	0.00030973	1	1	2	Q9P0K7	Q9P0K7 [896-912]		0	2260.21	0.936	21.18		100	K.EALNSLSQLSYSTSSSK.R
FALSE	[K].ENIQTLLK.[S]	1xTMT6plex [K8]; 1xTMT6plex [N-Term]	0.00030973	1	1	2	Q9P0K7	Q9P0K7 [836-843]		0	1416.88	0.838	28.63		100	K.ENIQTLLK.S
FALSE	[K].CPAESVDSSGK.[T]	1xCarbamidomethyl [C1]; 1xTMT6plex [K11]; 1xTMT6plex [N-Term]	0.00030973	1	1	3	Q9P0K7	Q9P0K7 [110-120]		0	1594.81	0.859	37.99		100	K.CPAESVDSSGK.T
FALSE	[K].GTVIKPPVEEYEEMK.[S]	2xTMT6plex [K5; K15]; 1xTMT6plex [N-Term]	0.00030973	1	1	2	Q9P0K7	Q9P0K7 [566-580]		0	2436.37	0.819	35.63		100	K.GTVIKPPVEEYEEMK.S
FALSE	[K].AAMTDAMVPR.[S]	1xTMT6plex [N-Term]	0.00030973	1	1	1	Q9P0K7	Q9P0K7 [777-786]		0	1291.67	0.75	29.22		100	K.AAMTDAMVPR.S
FALSE	[K].ISQDADLK.[T]	1xTMT6plex [K8]; 1xTMT6plex [N-Term]	0.000568404	1	1	1	Q9P0K7	Q9P0K7 [241-248]		0	1347.79	0.864	27.18		100	K.ISQDADLK.T
FALSE	[K].AAMTDAMVPR.[S]	1xOxidation [M]; 1xTMT6plex [N-Term]	0.000568404	1	1	3	Q9P0K7	Q9P0K7 [777-786]		0	1307.66	0.938	6.63		100	K.AAMTDAMVPR.S
FALSE	[K].EVLSVQK.[Q]	1xTMT6plex [K7]; 1xTMT6plex [N-Term]	0.000568404	1	1	4	Q9P0K7	Q9P0K7 [498-504]		0	1260.79	0.851	32.25		100	K.EVLSVQK.Q
FALSE	[R].MIDELNK.[TQ]	1xTMT6plex [K7]; 1xTMT6plex [N-Term]	0.00139174	1	2	2	Q9P0K7	Q9P0K7 [637-643]		0	1320.76	0.856	26.8		100	R.MIDELNK.Q
FALSE	[K].QLVDAQK.[E]	1xTMT6plex [K7]; 1xTMT6plex [N-Term]	0.00237856	1	1	1	Q9P0K7	Q9P0K7 [718-724]		0	1259.77	0.827	31.11		100	K.QLVDAQK.E
FALSE	[K].VASLLGK.[K]	1xTMT6plex [K7]; 1xTMT6plex [N-Term]	0.00380261	1	1	1	Q9P0K7	Q9P0K7 [35-41]		0	1145.77	0.883	20.67		100	K.VASLLGK.K
FALSE	[K].EAQAELEDYRK.[R]	1xTMT6plex [K11]; 1xTMT6plex [N-Term]	0.00380261	1	1	2	Q9P0K7	Q9P0K7 [654-664]		1	1809.97	0.885	25.14		100	K.EAQAELEDYRK.R
FALSE	[R].SEVSQVK.[R]	1xTMT6plex [K7]; 1xTMT6plex [N-Term]	0.00453697	1	1	1	Q9P0K7	Q9P0K7 [826-832]		0	1234.74	0.844	33.95		100	R.SEVSQVK.R
FALSE	[K].YEEAMK.[E]	1xTMT6plex [K6]; 1xTMT6plex [N-Term]	0.00616547	1	1	2	Q9P0K7	Q9P0K7 [492-497]		0	1228.66	0.782	33.75		100	K.YEEAMK.E
FALSE	[K].AEISSIR.[E]	1xTMT6plex [N-Term]	0.00947302	1	1	1	Q9P0K7	Q9P0K7 [314-320]		0	1004.59	0.899	28.48		100	K.AEISSIR.E
High	P06748	Nucleophosmin OS=Homo sapiens OX=9606 GN=NPM1 PE=1 SV=2	129.064	39	10	75	10	294	32.6	4.78	276.72	10	4869	NPM1	9067.7	9252.9	7694.3	10686.2	11365.7	7532.8
Checked	Annotated Sequence	Modifications	Qvality q-value	# Protein Groups	# Proteins	# PSMs	Master Protein Accessions	Positions in Master Proteins	Modifications in Master Proteins	# Missed Cleavages	Theo. MH+ [Da]	Abundance Ratio: (HO) / (WT)	Abundances (Grouped) CV [%]: HO	Quan Info	Channel Occupancy [%]	Sequence in Protein
FALSE	[K].MSVQPTVSLGGFEITPPVVLR.[L]	1xTMT6plex [N-Term]	0.00030973	1	1	2	P06748	P06748 [81-101]		0	2456.38	1.07	23.15		100	K.MSVQPTVSLGGFEITPPVVLR.L
FALSE	[K].MSVQPTVSLGGFEITPPVVLR.[L]	1xOxidation [M1]; 1xTMT6plex [N-Term]	0.00030973	1	1	3	P06748	P06748 [81-101]		0	2472.37	1.009	26.52		100	K.MSVQPTVSLGGFEITPPVVLR.L
FALSE	[R].MTDQEAIQDLWQWR.[K]	1xTMT6plex [N-Term]	0.00030973	1	1	3	P06748	P06748 [278-291]		0	2049.01	1.069	26.22		100	R.MTDQEAIQDLWQWR.K
FALSE	[R].MTDQEAIQDLWQWR.[K]	1xOxidation [M1]; 1xTMT6plex [N-Term]	0.00030973	1	1	2	P06748	P06748 [278-291]		0	2065	1.111	28.51		100	R.MTDQEAIQDLWQWR.K
FALSE	[R].TVSLGAGAK.[D]	1xTMT6plex [K9]; 1xTMT6plex [N-Term]	0.00030973	1	1	8	P06748	P06748 [46-54]		0	1261.79	0.935	20.01		100	R.TVSLGAGAK.D
FALSE	[K].VDNDENEHQLSLR.[T]	1xTMT6plex [N-Term]	0.00030973	1	1	16	P06748	P06748 [33-45]		0	1797.89	1.01	23.03		100	K.VDNDENEHQLSLR.T
FALSE	[K].DELHIVEAEAMNYEGSPIK.[V]	1xOxidation [M11]; 1xTMT6plex [K19]; 1xTMT6plex [N-Term]	0.00030973	1	1	11	P06748	P06748 [55-73]		0	2619.34	1.104	11.45		100	K.DELHIVEAEAMNYEGSPIK.V
FALSE	[K].DELHIVEAEAMNYEGSPIK.[V]	1xTMT6plex [K19]; 1xTMT6plex [N-Term]	0.00030973	1	1	5	P06748	P06748 [55-73]		0	2603.34	0.989	25.11		100	K.DELHIVEAEAMNYEGSPIK.V
FALSE	[K].GPSSVEDIK.[A]	1xTMT6plex [K9]; 1xTMT6plex [N-Term]	0.00030973	1	1	11	P06748	P06748 [240-248]		0	1389.8	0.97	18.96		100	K.GPSSVEDIK.A
FALSE	[R].SAPGGGSK.[V]	1xTMT6plex [K8]; 1xTMT6plex [N-Term]	0.000568404	1	1	5	P06748	P06748 [143-150]		0	1118.66	0.963	26.5		100	R.SAPGGGSK.V
FALSE	[K].VTLATLK.[M]	1xTMT6plex [K7]; 1xTMT6plex [N-Term]	0.000568404	1	1	3	P06748	P06748 [74-80]		0	1203.81	0.964	25.84		100	K.VTLATLK.M
FALSE	[K].MQASIEK.[G]	1xTMT6plex [K7]; 1xTMT6plex [N-Term]	0.000568404	1	1	4	P06748	P06748 [251-257]		0	1264.73	0.988	28.25		100	K.MQASIEK.G
FALSE	[RK].LISISGK.[VR]	1xTMT6plex [K7]; 1xTMT6plex [N-Term]	0.00237856	1	2	4	P06748	P06748 [135-141]		0	1175.78	0.95	27.4		100	K.LLSISGK.R
High	P19338	Nucleolin OS=Homo sapiens OX=9606 GN=NCL PE=1 SV=3	129.006	37	29	107	29	710	76.6	4.7	294	29	4691	NCL	17225.9	18504.5	14201.9	20893.8	23566.6	14529.7
Checked	Annotated Sequence	Modifications	Qvality q-value	# Protein Groups	# Proteins	# PSMs	Master Protein Accessions	Positions in Master Proteins	Modifications in Master Proteins	# Missed Cleavages	Theo. MH+ [Da]	Abundance Ratio: (HO) / (WT)	Abundances (Grouped) CV [%]: HO	Quan Info	Channel Occupancy [%]	Sequence in Protein
FALSE	[K].NDLAVVDVR.[I]	1xTMT6plex [N-Term]	0.00030973	1	1	7	P19338	P19338 [334-342]		0	1229.71	0.926	23.92		100	K.NDLAVVDVR.I
FALSE	[K].VAVATPAK.[K]	1xTMT6plex [K8]; 1xTMT6plex [N-Term]	0.00030973	1	1	6	P19338	P19338 [72-79]		0	1214.79	0.88	25.05		100	K.VAVATPAK.K
FALSE	[K].VEGTEPTTAFNLFVGNLNFNK.[S]	1xTMT6plex [K21]; 1xTMT6plex [N-Term]	0.00030973	1	1	2	P19338	P19338 [298-318]		0	2770.48	0.949	31		100	K.VEGTEPTTAFNLFVGNLNFNK.S
FALSE	[K].TGISDVFAK.[N]	1xTMT6plex [K9]; 1xTMT6plex [N-Term]	0.00030973	1	1	3	P19338	P19338 [325-333]		0	1395.82	0.946	31.31		100	K.TGISDVFAK.N
FALSE	[R].SISLYYTGEK.[G]	1xTMT6plex [K10]; 1xTMT6plex [N-Term]	0.00030973	1	1	4	P19338	P19338 [458-467]		0	1618.91	0.976	40.13		100	R.SISLYYTGEK.G
FALSE	[K].ALELTGLK.[V]	1xTMT6plex [K8]; 1xTMT6plex [N-Term]	0.00030973	1	1	6	P19338	P19338 [363-370]		0	1302.84	0.928	33.38		100	K.ALELTGLK.V
FALSE	[K].EVFEDAAEIR.[L]	1xTMT6plex [N-Term]	0.00030973	1	1	4	P19338	P19338 [411-420]		0	1407.73	0.952	24.41		100	K.EVFEDAAEIR.L
FALSE	[K].FGYVDFESAEDLEK.[A]	1xTMT6plex [K14]; 1xTMT6plex [N-Term]	0.00030973	1	1	3	P19338	P19338 [349-362]		0	2107.06	1.161	17		100	K.FGYVDFESAEDLEK.A
FALSE	[K].EAMEDGEIDGNK.[V]	1xTMT6plex [K12]; 1xTMT6plex [N-Term]	0.00030973	1	1	2	P19338	P19338 [628-639]		0	1765.87	0.925	28.06		100	K.EAMEDGEIDGNK.V
FALSE	[K].EALNSCNK.[R]	1xCarbamidomethyl [C6]; 1xTMT6plex [K8]; 1xTMT6plex [N-Term]	0.00030973	1	1	3	P19338	P19338 [538-545]		0	1393.75	0.895	34.31		100	K.EALNSCNK.R
FALSE	[K].GLSEDTTEETLK.[E]	1xTMT6plex [K12]; 1xTMT6plex [N-Term]	0.00030973	1	1	7	P19338	P19338 [578-589]		0	1780.96	0.929	29.41		100	K.GLSEDTTEETLK.E
FALSE	[K].GIAYIEFK.[T]	1xTMT6plex [K8]; 1xTMT6plex [N-Term]	0.00030973	1	1	4	P19338	P19338 [430-437]		0	1398.84	0.872	37.99		100	K.GIAYIEFK.T
FALSE	[K].GFGFVDFNSEEDAK.[A]	1xTMT6plex [K14]; 1xTMT6plex [N-Term]	0.00030973	1	1	6	P19338	P19338 [611-624]		0	2020.01	1.045	25.64		100	K.GFGFVDFNSEEDAK.A
FALSE	[K].QGTEIDGR.[S]	1xTMT6plex [N-Term]	0.000568404	1	1	3	P19338	P19338 [450-457]		0	1104.58	1.009	7.54		100	K.QGTEIDGR.S
FALSE	[K].VPQNQNGK.[S]	1xTMT6plex [K8]; 1xTMT6plex [N-Term]	0.000568404	1	1	3	P19338	P19338 [514-521]		0	1342.78	0.875	23.13		100	K.VPQNQNGK.S
FALSE	[K].VTQDELK.[E]	1xTMT6plex [K7]; 1xTMT6plex [N-Term]	0.000568404	1	1	7	P19338	P19338 [404-410]		0	1290.77	0.903	29.92		100	K.VTQDELK.E
FALSE	[K].ESFDGSVR.[A]	1xTMT6plex [N-Term]	0.000568404	1	1	5	P19338	P19338 [590-597]		0	1125.57	0.98	28.16		100	K.ESFDGSVR.A
FALSE	[K].NSTWSGESK.[T]	1xTMT6plex [K9]; 1xTMT6plex [N-Term]	0.000568404	1	1	3	P19338	P19338 [478-486]		0	1453.77	0.909	38.55		100	K.NSTWSGESK.T
FALSE	[R].IVTDRETGSSK.[G]	1xTMT6plex [K11]; 1xTMT6plex [N-Term]	0.000568404	1	1	1	P19338	P19338 [600-610]		1	1650.94	0.676	24.35		100	R.IVTDRETGSSK.G
FALSE	[K].AAATSAK.[K]	1xTMT6plex [K7]; 1xTMT6plex [N-Term]	0.00115152	1	1	4	P19338	P19338 [56-62]		0	1077.67	0.97	17.64		100	K.AAATSAK.K
FALSE	[K].VFGNEIK.[L]	1xTMT6plex [K7]; 1xTMT6plex [N-Term]	0.00139174	1	1	3	P19338	P19338 [371-377]		0	1264.77	0.882	28.49		100	K.VFGNEIK.L
FALSE	[K].TEADAEK.[T]	1xTMT6plex [K7]; 1xTMT6plex [N-Term]	0.00139174	1	1	2	P19338	P19338 [438-444]		0	1221.67	1.016	21.7		100	K.TEADAEK.T
FALSE	[K].ALVATPGK.[K]	1xTMT6plex [K8]; 1xTMT6plex [N-Term]	0.00164966	1	1	3	P19338	P19338 [117-124]		0	1214.79	0.878	24.35		100	K.ALVATPGK.K
FALSE	[R].LELQGPR.[G]	1xTMT6plex [N-Term]	0.00237856	1	1	6	P19338	P19338 [555-561]		0	1041.63	0.805	22.67		100	R.LELQGPR.G
FALSE	[K].GAAIPAK.[G]	1xTMT6plex [K7]; 1xTMT6plex [N-Term]	0.00237856	1	1	3	P19338	P19338 [126-132]		0	1085.71	0.888	25.16		100	K.GAAIPAK.G
FALSE	[K].GQNQDYR.[G]	1xTMT6plex [N-Term]	0.00283146	1	1	2	P19338	P19338 [468-474]		0	1109.55	1.079	9.09		100	K.GQNQDYR.G
FALSE	[K].AAATPAK.[K]	1xTMT6plex [K7]; 1xTMT6plex [N-Term]	0.00797596	1	1	1	P19338	P19338 [89-95]		0	1087.69	0.904	29.01		100	K.AAATPAK.K
FALSE	[K].AVTTPGK.[K]	1xTMT6plex [K7]; 1xTMT6plex [N-Term]	0.00813383	1	1	1	P19338	P19338 [103-109]		0	1131.71	0.981	23.22		100	K.AVTTPGK.K
FALSE	[K].VVVSPTK.[K]	1xTMT6plex [K7]; 1xTMT6plex [N-Term]	0.00813383	1	1	3	P19338	P19338 [64-70]		0	1187.78	0.907	21.97		100	K.VVVSPTK.K
High	Q13045	Protein flightless-1 homolog OS=Homo sapiens OX=9606 GN=FLII PE=1 SV=2	127.387	22	24	46	24	1269	144.7	6.05	148.56	24	2314	FLII	5288.6	5573.4	4504	6209.9	6776.4	4584
Checked	Annotated Sequence	Modifications	Qvality q-value	# Protein Groups	# Proteins	# PSMs	Master Protein Accessions	Positions in Master Proteins	Modifications in Master Proteins	# Missed Cleavages	Theo. MH+ [Da]	Abundance Ratio: (HO) / (WT)	Abundances (Grouped) CV [%]: HO	Quan Info	Channel Occupancy [%]	Sequence in Protein
FALSE	[R].MTQQQENPK.[F]	1xTMT6plex [K9]; 1xTMT6plex [N-Term]	0.00030973	1	1	3	Q13045	Q13045 [1021-1029]		0	1561.84	0.95	37.3		100	R.MTQQQENPK.F
FALSE	[R].NAEAVLQSPGLSGK.[V]	1xTMT6plex [K14]; 1xTMT6plex [N-Term]	0.00030973	1	1	4	Q13045	Q13045 [849-862]		0	1829.05	0.866	24.95		100	R.NAEAVLQSPGLSGK.V
FALSE	[R].QLPAMTALQTLHLR.[S]	1xTMT6plex [N-Term]	0.00030973	1	1	1	Q13045	Q13045 [193-206]		0	1822.06	0.93	16.51		100	R.QLPAMTALQTLHLR.S
FALSE	[R].NQLTSLPSAICK.[L]	1xCarbamidomethyl [C11]; 1xTMT6plex [K12]; 1xTMT6plex [N-Term]	0.00030973	1	1	2	Q13045	Q13045 [279-290]		0	1790.02	0.93	14.62		100	R.NQLTSLPSAICK.L
FALSE	[K].NSGVPDDIFK.[L]	1xTMT6plex [K10]; 1xTMT6plex [N-Term]	0.00030973	1	1	3	Q13045	Q13045 [93-102]		0	1549.86	0.926	25.51		100	K.NSGVPDDIFK.L
FALSE	[K].LDDLSVLDLSHNQLTECPR.[E]	1xCarbamidomethyl [C17]; 1xTMT6plex [N-Term]	0.00030973	1	1	1	Q13045	Q13045 [103-121]		0	2454.25	0.942	6.98		100	K.LDDLSVLDLSHNQLTECPR.E
FALSE	[K].LDFDGLPSGIGK.[L]	1xTMT6plex [K12]; 1xTMT6plex [N-Term]	0.00030973	1	1	3	Q13045	Q13045 [304-315]		0	1676.96	0.988	22.7		100	K.LDFDGLPSGIGK.L
FALSE	[R].LAGASPATVAAAAAAGSGPK.[D]	1xTMT6plex [K20]; 1xTMT6plex [N-Term]	0.00030973	1	1	2	Q13045	Q13045 [402-421]		0	2097.21	0.898	21.71		100	R.LAGASPATVAAAAAAGSGPK.D
FALSE	[R].LLQSLLDTR.[C]	1xTMT6plex [N-Term]	0.00030973	1	1	1	Q13045	Q13045 [765-773]		0	1287.78	0.979	27.13		100	R.LLQSLLDTR.C
FALSE	[K].VGLGLGYLELPQINYK.[L]	1xTMT6plex [K16]; 1xTMT6plex [N-Term]	0.00030973	1	1	1	Q13045	Q13045 [731-746]		0	2235.32	1.436	11.37		100	K.VGLGLGYLELPQINYK.L
FALSE	[R].VPECLYTLPSLR.[R]	1xCarbamidomethyl [C4]; 1xTMT6plex [N-Term]	0.00030973	1	1	1	Q13045	Q13045 [238-249]		0	1676.92			No Quan Values		R.VPECLYTLPSLR.R
FALSE	[R].SLEGTEAQVFK.[A]	1xTMT6plex [K11]; 1xTMT6plex [N-Term]	0.00030973	1	1	6	Q13045	Q13045 [822-832]		0	1666.94	0.854	25.74		100	R.SLEGTEAQVFK.A
FALSE	[R].TGLCYLPEELAALQK.[L]	1xCarbamidomethyl [C4]; 1xTMT6plex [K15]; 1xTMT6plex [N-Term]	0.00030973	1	1	1	Q13045	Q13045 [43-57]		0	2164.21	0.921	22.39		100	R.TGLCYLPEELAALQK.L
FALSE	[K].ADLTALFLPR.[Q]	1xTMT6plex [N-Term]	0.00030973	1	1	1	Q13045	Q13045 [875-884]		0	1345.8	1.13	0.68		100	K.ADLTALFLPR.Q
FALSE	[K].GMSDVAQEK.[N]	1xTMT6plex [K9]; 1xTMT6plex [N-Term]	0.00030973	1	1	3	Q13045	Q13045 [448-456]		0	1422.77	0.924	35.24		100	K.GMSDVAQEK.N
FALSE	[K].GYFAVTEK.[C]	1xTMT6plex [K8]; 1xTMT6plex [N-Term]	0.00030973	1	1	2	Q13045	Q13045 [1174-1181]		0	1372.79	0.843	40.5		100	K.GYFAVTEK.C
FALSE	[K].ACSAIHAVNLR.[N]	1xCarbamidomethyl [C2]; 1xTMT6plex [N-Term]	0.00030973	1	1	1	Q13045	Q13045 [559-569]		0	1440.79	0.97	8.32		100	K.ACSAIHAVNLR.N
FALSE	[R].GAQATLSSTTK.[A]	1xTMT6plex [K11]; 1xTMT6plex [N-Term]	0.00030973	1	1	3	Q13045	Q13045 [661-671]		0	1522.88	0.78	36.33		100	R.GAQATLSSTTK.A
FALSE	[K].AVQGAQQPSLYQIR.[T]	1xTMT6plex [N-Term]	0.00030973	1	1	1	Q13045	Q13045 [1047-1060]		0	1788	0.745	23.32		100	K.AVQGAQQPSLYQIR.T
FALSE	[K].GGYFPENVK.[A]	1xTMT6plex [K9]; 1xTMT6plex [N-Term]	0.000568404	1	1	1	Q13045	Q13045 [22-30]		0	1468.82	0.927	41.52		100	K.GGYFPENVK.A
FALSE	[R].NYLGAECR.[T]	1xCarbamidomethyl [C7]; 1xTMT6plex [N-Term]	0.000568404	1	1	2	Q13045	Q13045 [570-577]		0	1211.6	0.961	26.38		100	R.NYLGAECR.T
FALSE	[K].LYLNSNK.[L]	1xTMT6plex [K7]; 1xTMT6plex [N-Term]	0.00139174	1	1	1	Q13045	Q13045 [297-303]		0	1309.79	0.961	17.42		100	K.LYLNSNK.L
FALSE	[R].FVFLLDR.[G]	1xTMT6plex [N-Term]	0.00237856	1	1	1	Q13045	Q13045 [646-652]		0	1138.68	0.881	28.73		100	R.FVFLLDR.G
FALSE	[K].LEPVPLK.[G]	1xTMT6plex [K7]; 1xTMT6plex [N-Term]	0.00258338	1	1	1	Q13045	Q13045 [632-638]		0	1253.82	0.984	26.12		100	K.LEPVPLK.G
High	P11142	Heat shock cognate 71 kDa protein OS=Homo sapiens OX=9606 GN=HSPA8 PE=1 SV=1	123.471	43	25	45	19	646	70.9	5.52	127.49	25	3312	HSPA8	4806.8	6449.7	4264.3	5418.4	8132.5	5115.1
Checked	Annotated Sequence	Modifications	Qvality q-value	# Protein Groups	# Proteins	# PSMs	Master Protein Accessions	Positions in Master Proteins	Modifications in Master Proteins	# Missed Cleavages	Theo. MH+ [Da]	Abundance Ratio: (HO) / (WT)	Abundances (Grouped) CV [%]: HO	Quan Info	Channel Occupancy [%]	Sequence in Protein
FALSE	[K].NQVAMNPTNTVFDAK.[R]	1xTMT6plex [K15]; 1xTMT6plex [N-Term]	0.00030973	1	1	3	P11142	P11142 [57-71]		0	2108.12	0.808	25.02		100	K.NQVAMNPTNTVFDAK.R
FALSE	[K].NQVAMNPTNTVFDAK.[R]	1xOxidation [M5]; 1xTMT6plex [K15]; 1xTMT6plex [N-Term]	0.00030973	1	1	2	P11142	P11142 [57-71]		0	2124.12	0.969	11.28		100	K.NQVAMNPTNTVFDAK.R
FALSE	[K].LLQDFFNGK.[E]	1xTMT6plex [K9]; 1xTMT6plex [N-Term]	0.00030973	1	3	2	P11142	P11142 [349-357]		0	1539.89	0.69	15.05		100	K.LLQDFFNGK.E
FALSE	[R].IINEPTAAAIAYGLDK.[KRG]	1xTMT6plex [K16]; 1xTMT6plex [N-Term]	0.00030973	2	4	3	P11142; P11021	P11142 [172-187]; P11021 [198-213]		0	2118.22	0.719	23.64	Shared	100	R.IINEPTAAAIAYGLDK.K
FALSE	[K].VCNPIITK.[L]	1xCarbamidomethyl [C2]; 1xTMT6plex [K8]; 1xTMT6plex [N-Term]	0.00030973	1	1	1	P11142	P11142 [602-609]		0	1402.85	0.728	11.88		100	K.VCNPIITK.L
FALSE	[K].TVTNAVVTVPAYFNDSQR.[Q]	1xTMT6plex [N-Term]	0.00030973	1	1	1	P11142	P11142 [138-155]		0	2211.16	0.814	23.95		100	K.TVTNAVVTVPAYFNDSQR.Q
FALSE	[R].TTPSYVAFTDTER.[L]	1xTMT6plex [N-Term]	0.00030973	2	6	3	P11142; P0DMV9	P11142 [37-49]; P0DMV9 [37-49]		0	1716.86	0.927	6.79	Shared	100	R.TTPSYVAFTDTER.L
FALSE	[K].SINPDEAVAYGAAVQAAILSGDK.[S]	1xTMT6plex [K23]; 1xTMT6plex [N-Term]	0.00030973	1	1	1	P11142	P11142 [362-384]		0	2718.47	0.719	26.47		100	K.SINPDEAVAYGAAVQAAILSGDK.S
FALSE	[K].SFYPEEVSSMVLTK.[M]	1xTMT6plex [K14]; 1xTMT6plex [N-Term]	0.00030973	1	1	1	P11142	P11142 [113-126]		0	2075.11	0.818	39.83		100	K.SFYPEEVSSMVLTK.M
FALSE	[K].QTQTFTTYSDNQPGVLIQVYEGER.[A]	1xTMT6plex [N-Term]	0.00030973	1	1	1	P11142	P11142 [424-447]		0	3003.49			No Quan Values		K.QTQTFTTYSDNQPGVLIQVYEGER.A
FALSE	[R].RFDDAVVQSDMK.[H]	1xTMT6plex [K12]; 1xTMT6plex [N-Term]	0.00030973	1	1	1	P11142	P11142 [77-88]		1	1868.99			No Quan Values		R.RFDDAVVQSDMK.H
FALSE	[R].RFDDAVVQSDMK.[H]	1xOxidation [M11]; 1xTMT6plex [K12]; 1xTMT6plex [N-Term]	0.00030973	1	1	1	P11142	P11142 [77-88]		1	1884.99	0.709	35.7		100	R.RFDDAVVQSDMK.H
FALSE	[K].STAGDTHLGGEDFDNR.[M]	1xTMT6plex [N-Term]	0.00030973	1	2	3	P11142	P11142 [221-236]		0	1920.89	0.84	9.84		100	K.STAGDTHLGGEDFDNR.M
FALSE	[R].FDDAVVQSDMK.[H]	1xTMT6plex [K11]; 1xTMT6plex [N-Term]	0.00030973	1	1	1	P11142	P11142 [78-88]		0	1712.89	0.754	32.02		100	R.FDDAVVQSDMK.H
FALSE	[R].FEELNADLFR.[G]	1xTMT6plex [N-Term]	0.00030973	1	2	1	P11142	P11142 [302-311]		0	1482.78	0.83	18.21		100	R.FEELNADLFR.G
FALSE	[R].GTLDPVEK.[A]	1xTMT6plex [K8]; 1xTMT6plex [N-Term]	0.00030973	1	1	2	P11142	P11142 [312-319]		0	1316.78	0.707	22.62		100	R.GTLDPVEK.A
FALSE	[K].DAGTIAGLNVLR.[I]	1xTMT6plex [N-Term]	0.00030973	1	1	2	P11142	P11142 [160-171]		0	1428.84	0.883	2.42		100	K.DAGTIAGLNVLR.I
FALSE	[K].EEFEHQQK.[E]	1xTMT6plex [K8]; 1xTMT6plex [N-Term]	0.000568404	1	1	2	P11142	P11142 [590-597]		0	1532.81	0.759	10.71		100	K.EEFEHQQK.E
FALSE	[K].ATVEDEK.[L]	1xTMT6plex [K7]; 1xTMT6plex [N-Term]	0.000568404	1	1	1	P11142	P11142 [551-557]		0	1249.7	0.789	13.37		100	K.ATVEDEK.L
FALSE	[R].LIGDAAK.[N]	1xTMT6plex [K7]; 1xTMT6plex [N-Term]	0.000568404	3	5	2	P11142; P11021; P0DMV9	P11142 [50-56]; P11021 [75-81]; P0DMV9 [50-56]		0	1145.73	0.691	22.23	Shared	100	R.LIGDAAK.N
FALSE	[K].NSLESYAFNMK.[A]	1xTMT6plex [K11]; 1xTMT6plex [N-Term]	0.000568404	1	1	2	P11142	P11142 [540-550]		0	1761.92	0.886	2.78		100	K.NSLESYAFNMK.A
FALSE	[R].MVQEAEK.[Y]	1xTMT6plex [K7]; 1xTMT6plex [N-Term]	0.00139174	2	2	1	P11142; P0DMV9	P11142 [518-524]; P0DMV9 [518-524]		0	1292.73	0.765	25.62	Shared	100	R.MVQEAEK.Y
FALSE	[K].DNNLLGK.[F]	1xTMT6plex [K7]; 1xTMT6plex [N-Term]	0.00164966	1	2	1	P11142	P11142 [452-458]		0	1231.74	0.604	10.34		100	K.DNNLLGK.F
FALSE	[K].ITITNDK.[G]	1xTMT6plex [K7]; 1xTMT6plex [N-Term]	0.00218929	2	5	2	P11142; P0DMV9	P11142 [501-507]; P0DMV9 [501-507]		0	1262.77	0.673	18.65	Shared	100	K.ITITNDK.G
FALSE	[R].MVNHFIAEFK.[R]	1xTMT6plex [K10]; 1xTMT6plex [N-Term]	0.00218929	1	1	1	P11142	P11142 [237-246]		0	1693.95	0.918	7.08		100	R.MVNHFIAEFK.R
FALSE	[K].NQTAEK.[E]	1xTMT6plex [K6]; 1xTMT6plex [N-Term]	0.00237856	1	1	2	P11142	P11142 [584-589]		0	1148.67	0.879	12.6		100	K.NQTAEK.E
FALSE	[R].NTTIPTK.[QK]	1xTMT6plex [K7]; 1xTMT6plex [N-Term]	0.00797596	2	3	2	P11142; P38646	P11142 [417-423]; P38646 [461-467]		0	1232.76	0.703	12.8	Shared	100	R.NTTIPTK.Q
High	P63267	Actin, gamma-enteric smooth muscle OS=Homo sapiens OX=9606 GN=ACTG2 PE=1 SV=1	123.139	42	14	401	4	376	41.9	5.48	1147.9	14	72	ACTG2	2735.6	3363.9	2217.1	3375.4	4508.4	2510
Checked	Annotated Sequence	Modifications	Qvality q-value	# Protein Groups	# Proteins	# PSMs	Master Protein Accessions	Positions in Master Proteins	Modifications in Master Proteins	# Missed Cleavages	Theo. MH+ [Da]	Abundance Ratio: (HO) / (WT)	Abundances (Grouped) CV [%]: HO	Quan Info	Channel Occupancy [%]	Sequence in Protein
FALSE	[R].HQGVMVGMGQK.[D]	1xTMT6plex [K11]; 1xTMT6plex [N-Term]	0.00030973	3	7	7	P63267; P60709; Q562R1	P63267 [41-51]; P60709 [40-50]; Q562R1 [41-51]		0	1629.9	0.783	10.12	Shared	100	R.HQGVMVGMGQK.D
FALSE	[R].HQGVMVGMGQK.[D]	1xOxidation [M]; 1xTMT6plex [K11]; 1xTMT6plex [N-Term]	0.00030973	3	7	44	P63267; P60709; Q562R1	P63267 [41-51]; P60709 [40-50]; Q562R1 [41-51]		0	1645.89	0.765	19.56	Shared	100	R.HQGVMVGMGQK.D
FALSE	[R].HQGVMVGMGQK.[D]	2xOxidation [M5; M8]; 1xTMT6plex [K11]; 1xTMT6plex [N-Term]	0.00030973	3	7	50	P63267; P60709; Q562R1	P63267 [41-51]; P60709 [40-50]; Q562R1 [41-51]		0	1661.89	0.851	12.81	Shared	100	R.HQGVMVGMGQK.D
FALSE	[R].VAPEEHPTLLTEAPLNPK.[A]	1xTMT6plex [K18]; 1xTMT6plex [N-Term]	0.00030973	1	4	2	P63267	P63267 [97-114]		0	2414.37	1.032	10.88		100	R.VAPEEHPTLLTEAPLNPK.A
FALSE	[K].YPIEHGIITNWDDMEK.[I]	1xTMT6plex [K16]; 1xTMT6plex [N-Term]	0.00030973	1	4	13	P63267	P63267 [70-85]		0	2419.24	0.793	34.56		100	K.YPIEHGIITNWDDMEK.I
FALSE	[K].YPIEHGIITNWDDMEK.[I]	1xOxidation [M14]; 1xTMT6plex [K16]; 1xTMT6plex [N-Term]	0.00030973	1	4	21	P63267	P63267 [70-85]		0	2435.23	0.785	28.54		100	K.YPIEHGIITNWDDMEK.I
FALSE	[KR].SYELPDGQVITIGNER.[F]	1xTMT6plex [N-Term]	0.00030973	3	10	35	P63267; P60709; Q562R1	P63267 [240-255]; P60709 [239-254]; Q562R1 [240-255]		0	2020.05	0.828	23.39	Shared	100	K.SYELPDGQVITIGNER.F
FALSE	[R].AVFPSIVGRPR.[QH]	1xTMT6plex [N-Term]	0.00030973	2	9	3	P63267; P60709	P63267 [30-40]; P60709 [29-39]		0	1427.87	0.795	18.42	Shared	100	R.AVFPSIVGRPR.H
FALSE	[K].DSYVGDEAQSK.[R]	1xTMT6plex [K11]; 1xTMT6plex [N-Term]	0.00030973	2	6	16	P63267; P60709	P63267 [52-62]; P60709 [51-61]		0	1656.85	0.783	26.29	Shared	100	K.DSYVGDEAQSK.R
FALSE	[K].EITALAPSTMK.[I]	1xTMT6plex [K11]; 1xTMT6plex [N-Term]	0.00030973	2	6	19	P63267; P60709	P63267 [317-327]; P60709 [316-326]		0	1619.94	0.757	24.94	Shared	100	K.EITALAPSTMK.I
FALSE	[K].EITALAPSTMK.[I]	1xOxidation [M10]; 1xTMT6plex [K11]; 1xTMT6plex [N-Term]	0.00030973	2	6	72	P63267; P60709	P63267 [317-327]; P60709 [316-326]		0	1635.94	0.906	8.36	Shared	100	K.EITALAPSTMK.I
FALSE	[R].GYSFVTTAER.[E]	1xTMT6plex [N-Term]	0.00030973	1	4	4	P63267	P63267 [198-207]		0	1359.71	0.877	26		100	R.GYSFVTTAER.E
FALSE	[K].AGFAGDDAPR.[A]	1xTMT6plex [N-Term]	0.00030973	2	10	30	P63267; P60709	P63267 [20-29]; P60709 [19-28]		0	1205.61	0.758	25.95	Shared	100	K.AGFAGDDAPR.A
FALSE	[R].DLTDYLMK.[I]	1xOxidation [M7]; 1xTMT6plex [K8]; 1xTMT6plex [N-Term]	0.00030973	3	7	57	P63267; P60709; Q562R1	P63267 [185-192]; P60709 [184-191]; Q562R1 [185-192]		0	1472.81	0.783	33.21	Shared	100	R.DLTDYLMK.I
FALSE	[R].DLTDYLMK.[I]	1xTMT6plex [K8]; 1xTMT6plex [N-Term]	0.00030973	3	7	13	P63267; P60709; Q562R1	P63267 [185-192]; P60709 [184-191]; Q562R1 [185-192]		0	1456.81	0.744	35.01	Shared	100	R.DLTDYLMK.I
FALSE	[K].DLYANNVLSGGTTMYPGIADR.[M]	1xOxidation [M14]; 1xTMT6plex [N-Term]	0.00030973	1	3	1	P63267	P63267 [293-313]		0	2473.22	1.171	0.86		100	K.DLYANNVLSGGTTMYPGIADR.M
FALSE	[K].IIAPPERK.[Y]	1xTMT6plex [K8]; 1xTMT6plex [N-Term]	0.00139174	3	7	3	P63267; P60709; Q562R1	P63267 [330-337]; P60709 [329-336]; Q562R1 [330-337]		1	1381.89	0.611	19.98	Shared	100	K.IIAPPERK.Y
FALSE	[K].RGILTLK.[Y]	1xTMT6plex [K7]; 1xTMT6plex [N-Term]	0.00237856	2	10	3	P63267; P60709	P63267 [63-69]; P60709 [62-68]		1	1258.86	0.588	42.24	Shared	100	K.RGILTLK.Y
FALSE	[K].IIAPPER.[K]	1xTMT6plex [N-Term]	0.00616547	3	7	8	P63267; P60709; Q562R1	P63267 [330-336]; P60709 [329-335]; Q562R1 [330-336]		0	1024.64	0.737	28.75	Shared	100	K.IIAPPER.K
High	P02538	Keratin, type II cytoskeletal 6A OS=Homo sapiens OX=9606 GN=KRT6A PE=1 SV=3	121.248	33	22	71	3	564	60	8	193.51	22	3853	KRT6A	783.2	557	1032.4	594.1	517	600.2
Checked	Annotated Sequence	Modifications	Qvality q-value	# Protein Groups	# Proteins	# PSMs	Master Protein Accessions	Positions in Master Proteins	Modifications in Master Proteins	# Missed Cleavages	Theo. MH+ [Da]	Abundance Ratio: (HO) / (WT)	Abundances (Grouped) CV [%]: HO	Quan Info	Channel Occupancy [%]	Sequence in Protein
FALSE	[K].NKLEGLEDALQK.[A]	2xTMT6plex [K2; K12]; 1xTMT6plex [N-Term]	0.00030973	2	3	1	P04259; P02538	P04259 [425-436]; P02538 [425-436]		1	2045.22	1.973	79.66	Shared	100	K.NKLEGLEDALQK.A
FALSE	[KR].NKYEDEINK.[HR]	2xTMT6plex [K2; K9]; 1xTMT6plex [N-Term]	0.00030973	5	7	1	P04264; P04259; P02538; P05787; P13647	P04264 [268-276]; P04259 [251-259]; P02538 [251-259]; P05787 [177-185]; P13647 [256-264]		1	1840.04	0.712	38.11	Shared	100	K.NKYEDEINK.R
FALSE	[R].NLDLDSIIAEVK.[A]	1xTMT6plex [K12]; 1xTMT6plex [N-Term]	0.00030973	4	7	7	P35908; P04259; P02538; P13647	P35908 [342-353]; P04259 [327-338]; P02538 [327-338]; P13647 [332-343]		0	1788.05	1.065	49.27	Shared	100	R.NLDLDSIIAEVK.A
FALSE	[R].QLDSIVGER.[G]	1xTMT6plex [N-Term]	0.00030973	2	3	5	P02538; P13647	P02538 [224-232]; P13647 [229-237]		0	1245.7	1.01	66.24	Shared	100	R.QLDSIVGER.G
FALSE	[K].LEGLEDALQK.[A]	1xTMT6plex [K10]; 1xTMT6plex [N-Term]	0.00030973	2	3	3	P04259; P02538	P04259 [427-436]; P02538 [427-436]		0	1573.92	1.253	83.63	Shared	100	K.LEGLEDALQK.A
FALSE	[R].QNLEPLFEQYINNLR.[R]	1xTMT6plex [N-Term]	0.00030973	3	4	2	P04259; P02538; P13647	P04259 [208-222]; P02538 [208-222]; P13647 [213-227]		0	2120.13	1.103	16.75	Shared	100	R.QNLEPLFEQYINNLR.R
FALSE	[K].WTLLQEQGTK.[T]	1xTMT6plex [K10]; 1xTMT6plex [N-Term]	0.00030973	3	4	1	P04259; P02538; P13647	P04259 [195-204]; P02538 [195-204]; P13647 [200-209]		0	1661.96	1.073	30.23	Shared	100	K.WTLLQEQGTK.T
FALSE	[KR].YEDEINK.[HR]	1xTMT6plex [K7]; 1xTMT6plex [N-Term]	0.00030973	7	12	7	P35908; P04264; P04259; P02538; P12035; P05787; P13647	P35908 [268-274]; P04264 [270-276]; P04259 [253-259]; P02538 [253-259]; P12035 [290-296]; P05787 [179-185]; P13647 [258-264]		0	1368.74	0.882	62.49	Shared	100	K.YEDEINK.R
FALSE	[K].YEELQVTAGR.[H]	1xTMT6plex [N-Term]	0.00030973	1	3	2	P02538	P02538 [360-369]		0	1394.75	1.297	62.96		100	K.YEELQVTAGR.H
FALSE	[R].SGFSSVSVSR.[S]	1xTMT6plex [N-Term]	0.00030973	1	1	3	P02538	P02538 [31-40]		0	1241.67	1.441	29.32		100	R.SGFSSVSVSR.S
FALSE	[R].QNLEPLFEQYINNLRR.[Q]	1xTMT6plex [N-Term]	0.00030973	3	4	1	P04259; P02538; P13647	P04259 [208-223]; P02538 [208-223]; P13647 [213-228]		1	2276.23	1.006	40.97	Shared	100	R.QNLEPLFEQYINNLRR.Q
FALSE	[R].TAAENEFVTLK.[K]	1xTMT6plex [K11]; 1xTMT6plex [N-Term]	0.00030973	3	4	4	P04259; P02538; P12035	P04259 [261-271]; P02538 [261-271]; P12035 [298-308]		0	1680.96	1.315	78.89	Shared	100	R.TAAENEFVTLK.K
FALSE	[R].SLYGLGGSKR.[I]	1xTMT6plex [K9]; 1xTMT6plex [N-Term]	0.00030973	2	3	1	P04259; P02538	P04259 [60-69]; P02538 [60-69]		1	1495.9	1.334	19.81	Shared	100	R.SLYGLGGSKR.I
FALSE	[KR].EYQELMNVK.[L]	1xTMT6plex [K9]; 1xTMT6plex [N-Term]	0.00030973	3	4	2	P04259; P02538; P05787	P04259 [447-455]; P02538 [447-455]; P05787 [373-381]		0	1611.88	1.28	65.65	Shared	100	K.EYQELMNVK.L
FALSE	[R].AIGGGLSSVGGGSSTIK.[Y]	1xTMT6plex [K17]; 1xTMT6plex [N-Term]	0.00030973	1	2	2	P02538	P02538 [534-550]		0	1906.1	1.445	34.27		100	R.AIGGGLSSVGGGSSTIK.Y
FALSE	[KR].AQYEEIAQR.[S]	1xTMT6plex [N-Term]	0.00030973	4	6	6	P35908; P04259; P02538; P19013	P35908 [354-362]; P04259 [339-347]; P02538 [339-347]; P19013 [327-335]		0	1336.71	0.984	48.1	Shared	100	K.AQYEEIAQR.S
FALSE	[K].DVDAAYMNK.[V]	1xOxidation [M7]; 1xTMT6plex [K9]; 1xTMT6plex [N-Term]	0.000568404	3	6	7	P04259; P02538; P13647	P04259 [273-281]; P02538 [273-281]; P13647 [278-286]		0	1500.78	1.078	73.4	Shared	100	K.DVDAAYMNK.V
FALSE	[R].FLEQQNK.[VLAIM]	1xTMT6plex [K7]; 1xTMT6plex [N-Term]	0.000568404	7	18	6	P08670; P04259; P02538; P12035; P05787; Q8N1N4; P13647	P08670 [123-129]; P04259 [183-189]; P02538 [183-189]; P12035 [218-224]; P05787 [111-117]; Q8N1N4 [131-137]; P13647 [188-194]		0	1364.79	0.773	53.81	Shared	100	R.FLEQQNK.V
FALSE	[KR].YEDEINKR.[T]	1xTMT6plex [K7]; 1xTMT6plex [N-Term]	0.000568404	7	11	4	P35908; P04264; P04259; P02538; P12035; P05787; P13647	P35908 [268-275]; P04264 [270-277]; P04259 [253-260]; P02538 [253-260]; P12035 [290-297]; P05787 [179-186]; P13647 [258-265]		1	1524.84	0.85	50.12	Shared	100	K.YEDEINKR.T
FALSE	[K].YTTTSSSSR.[K]	1xTMT6plex [N-Term]	0.000568404	2	3	3	P04259; P02538	P04259 [551-559]; P02538 [551-559]		0	1218.62	1.752	99.34	Shared	100	K.YTTTSSSSR.K
FALSE	[K].QEIAEINR.[M]	1xTMT6plex [N-Term]	0.00139174	2	3	1	P04259; P02538	P04259 [379-386]; P02538 [379-386]		0	1201.67	1.266	109.52	Shared	100	K.QEIAEINR.M
FALSE	[K].FASFIDK.[V]	1xTMT6plex [K7]; 1xTMT6plex [N-Term]	0.00139174	8	18	2	Q86Y46; P35908; P04259; P02538; P12035; P19013; P05787; P13647	Q86Y46 [143-149]; P35908 [189-195]; P04259 [174-180]; P02538 [174-180]; P12035 [209-215]; P19013 [162-168]; P05787 [102-108]; P13647 [179-185]		0	1285.76	1.076	55.1	Shared	100	K.FASFIDK.V
High	O14974	Protein phosphatase 1 regulatory subunit 12A OS=Homo sapiens OX=9606 GN=PPP1R12A PE=1 SV=1	118.42	22	23	57	23	1030	115.2	5.4	167.57	23	4659	PPP1R12A	5112.7	5518.3	4171.3	6266.6	6697.6	4546.6
Checked	Annotated Sequence	Modifications	Qvality q-value	# Protein Groups	# Proteins	# PSMs	Master Protein Accessions	Positions in Master Proteins	Modifications in Master Proteins	# Missed Cleavages	Theo. MH+ [Da]	Abundance Ratio: (HO) / (WT)	Abundances (Grouped) CV [%]: HO	Quan Info	Channel Occupancy [%]	Sequence in Protein
FALSE	[K].LYEQILAENEK.[L]	1xTMT6plex [K11]; 1xTMT6plex [N-Term]	0.00030973	1	1	4	O14974	O14974 [935-945]		0	1808.02	0.951	30.83		100	K.LYEQILAENEK.L
FALSE	[R].LSSSLDNK.[E]	1xTMT6plex [K8]; 1xTMT6plex [N-Term]	0.00030973	1	1	1	O14974	O14974 [476-483]		0	1321.77	0.806	30.37		100	R.LSSSLDNK.E
FALSE	[R].ISEMEEELK.[M]	1xTMT6plex [K9]; 1xTMT6plex [N-Term]	0.00030973	1	1	3	O14974	O14974 [994-1002]		0	1565.85	0.995	30.28		100	R.ISEMEEELK.M
FALSE	[R].LWAEDSTEK.[E]	1xTMT6plex [K9]; 1xTMT6plex [N-Term]	0.00030973	1	1	1	O14974	O14974 [613-621]		0	1536.83	0.869	24.19		100	R.LWAEDSTEK.E
FALSE	[K].ITTGSSSAGTQSSTSNR.[L]	1xTMT6plex [N-Term]	0.00030973	1	1	5	O14974	O14974 [596-612]		0	1870.93	0.943	10.64		100	K.ITTGSSSAGTQSSTSNR.L
FALSE	[R].QGVDIEAAR.[K]	1xTMT6plex [N-Term]	0.00030973	1	1	1	O14974	O14974 [162-170]		0	1187.66	0.958	30.71		100	R.QGVDIEAAR.K
FALSE	[R].LASTSDIEEK.[E]	1xTMT6plex [K10]; 1xTMT6plex [N-Term]	0.00030973	1	1	2	O14974	O14974 [505-514]		0	1550.87	0.859	35.9		100	R.LASTSDIEEK.E
FALSE	[R].IESLEQEK.[V]	1xTMT6plex [K8]; 1xTMT6plex [N-Term]	0.00030973	1	1	3	O14974	O14974 [334-341]		0	1433.83	0.887	25.18		100	R.IESLEQEK.V
FALSE	[R].YETSSTSAGDR.[Y]	1xTMT6plex [N-Term]	0.00030973	1	1	2	O14974	O14974 [890-900]		0	1402.66	1.036	17.34		100	R.YETSSTSAGDR.Y
FALSE	[R].YETSSTSAGDRYDSLLGR.[S]	1xTMT6plex [N-Term]	0.00030973	1	1	1	O14974	O14974 [890-907]		1	2207.08	0.923	25.81		100	R.YETSSTSAGDRYDSLLGR.S
FALSE	[K].SLLSSTSTTTK.[I]	1xTMT6plex [K11]; 1xTMT6plex [N-Term]	0.00030973	1	1	2	O14974	O14974 [585-595]		0	1583.93	0.863	28.48		100	K.SLLSSTSTTTK.I
FALSE	[R].SGSYSYLEER.[K]	1xTMT6plex [N-Term]	0.00030973	1	1	1	O14974	O14974 [908-917]		0	1419.7	0.971	22.27		100	R.SGSYSYLEER.K
FALSE	[R].SYLTPVRDEESESQR.[K]	1xTMT6plex [N-Term]	0.00030973	1	1	3	O14974	O14974 [668-682]		1	2025.01	0.881	23.34		100	R.SYLTPVRDEESESQR.K
FALSE	[R].STQGVTLTDLQEAEK.[T]	1xTMT6plex [K15]; 1xTMT6plex [N-Term]	0.00030973	1	1	3	O14974	O14974 [695-709]		0	2078.14	0.89	31.88		100	R.STQGVTLTDLQEAEK.T
FALSE	[K].SPLIESTANMDNNQSQK.[T]	1xTMT6plex [K17]; 1xTMT6plex [N-Term]	0.00030973	1	1	2	O14974	O14974 [299-315]		0	2335.2	1.066	38.95		100	K.SPLIESTANMDNNQSQK.T
FALSE	[K].SPLIESTANMDNNQSQK.[T]	1xOxidation [M10]; 1xTMT6plex [K17]; 1xTMT6plex [N-Term]	0.00030973	1	1	2	O14974	O14974 [299-315]		0	2351.19	0.894	35.9		100	K.SPLIESTANMDNNQSQK.T
FALSE	[K].ETLIIEPEK.[N]	1xTMT6plex [K9]; 1xTMT6plex [N-Term]	0.00030973	1	1	5	O14974	O14974 [321-329]		0	1529.92	0.907	33.58		100	K.ETLIIEPEK.N
FALSE	[K].DESPATWR.[L]	1xTMT6plex [N-Term]	0.0008677	1	1	3	O14974	O14974 [430-437]		0	1190.6	0.907	23.91		100	K.DESPATWR.L
FALSE	[R].LAYVAPTIPR.[R]	1xTMT6plex [N-Term]	0.0008677	1	1	1	O14974	O14974 [494-503]		0	1329.81	1.053	22.41		100	R.LAYVAPTIPR.R
FALSE	[K].DDSTDFK.[K]	1xTMT6plex [K7]; 1xTMT6plex [N-Term]	0.00139174	1	1	2	O14974	O14974 [927-933]		0	1285.67	0.971	23.42		100	K.DDSTDFK.K
FALSE	[K].QNLLHSEK.[R]	1xTMT6plex [K8]; 1xTMT6plex [N-Term]	0.00139174	1	1	3	O14974	O14974 [287-294]		0	1426.84	0.965	27.01		100	K.QNLLHSEK.R
FALSE	[R].SLLEMEK.[R]	1xTMT6plex [K7]; 1xTMT6plex [N-Term]	0.00139174	1	1	3	O14974	O14974 [978-984]		0	1307.76	0.978	25.31		100	R.SLLEMEK.R
FALSE	[R].YDSLLGR.[S]	1xTMT6plex [N-Term]	0.00164966	1	1	1	O14974	O14974 [901-907]		0	1052.59	0.958	40.97		100	R.YDSLLGR.S
FALSE	[R].ISEMEEELK.[M]	1xOxidation [M4]; 1xTMT6plex [K9]; 1xTMT6plex [N-Term]	0.00164966	1	1	1	O14974	O14974 [994-1002]		0	1581.84	0.92	20.99		100	R.ISEMEEELK.M
FALSE	[R].TSSSYTR.[R]	1xTMT6plex [N-Term]	0.00237856	1	1	2	O14974	O14974 [524-530]		0	1030.54	0.956	28.28		100	R.TSSSYTR.R
High	O95782	AP-2 complex subunit alpha-1 OS=Homo sapiens OX=9606 GN=AP2A1 PE=1 SV=3	117.202	27	26	50	18	977	107.5	7.03	135.34	26	160	AP2A1	5328.3	6049.4	4487.5	6326.7	7562.2	4839.2
Checked	Annotated Sequence	Modifications	Qvality q-value	# Protein Groups	# Proteins	# PSMs	Master Protein Accessions	Positions in Master Proteins	Modifications in Master Proteins	# Missed Cleavages	Theo. MH+ [Da]	Abundance Ratio: (HO) / (WT)	Abundances (Grouped) CV [%]: HO	Quan Info	Channel Occupancy [%]	Sequence in Protein
FALSE	[R].NADVELQQR.[A]	1xTMT6plex [N-Term]	0.00030973	2	2	3	O95782; O94973	O95782 [571-579]; O94973 [570-578]		0	1301.7	0.822	33.78	Shared	100	R.NADVELQQR.A
FALSE	[K].QLSLPQQEAQK.[I]	1xTMT6plex [K11]; 1xTMT6plex [N-Term]	0.00030973	1	1	4	O95782	O95782 [881-891]		0	1728.01	0.869	43.06		100	K.QLSLPQQEAQK.I
FALSE	[K].NNGVLFENQLLQIGVK.[S]	1xTMT6plex [K16]; 1xTMT6plex [N-Term]	0.00030973	1	1	1	O95782	O95782 [751-766]		0	2244.31	0.889	27.86		100	K.NNGVLFENQLLQIGVK.S
FALSE	[R].ILVAGDSMDSVK.[Q]	1xTMT6plex [K12]; 1xTMT6plex [N-Term]	0.00030973	1	1	3	O95782	O95782 [154-165]		0	1692.96	0.732	35.22		100	R.ILVAGDSMDSVK.Q
FALSE	[K].TVFEALQAPACHENMVK.[V]	1xCarbamidomethyl [C11]; 1xTMT6plex [K17]; 1xTMT6plex [N-Term]	0.00030973	1	1	1	O95782	O95782 [482-498]		0	2403.26			No Quan Values		K.TVFEALQAPACHENMVK.V
FALSE	[R].YGGAPQALTLK.[L]	1xTMT6plex [K11]; 1xTMT6plex [N-Term]	0.00030973	1	1	2	O95782	O95782 [846-856]		0	1576.95	0.974	4.15		100	R.YGGAPQALTLK.L
FALSE	[R].YLETADYAIR.[E]	1xTMT6plex [N-Term]	0.00030973	1	1	2	O95782	O95782 [412-421]		0	1443.77	0.869	35.3		100	R.YLETADYAIR.E
FALSE	[K].VGGYILGEFGNLIAGDPR.[S]	1xTMT6plex [N-Term]	0.00030973	2	2	1	O95782; O94973	O95782 [499-516]; O94973 [498-515]		0	2077.13	1.6	52.28	Shared	100	K.VGGYILGEFGNLIAGDPR.S
FALSE	[K].THIDTVINALK.[T]	1xTMT6plex [K11]; 1xTMT6plex [N-Term]	0.00030973	1	1	3	O95782	O95782 [368-378]		0	1683.02	1.09	4.63		100	K.THIDTVINALK.T
FALSE	[K].FFQPTEMAAQDFFQR.[W]	1xTMT6plex [N-Term]	0.00030973	1	1	1	O95782	O95782 [864-878]		0	2092.02	1.024	2.09		100	K.FFQPTEMAAQDFFQR.W
FALSE	[K].FFQPTEMAAQDFFQR.[W]	1xOxidation [M7]; 1xTMT6plex [N-Term]	0.00030973	1	1	2	O95782	O95782 [864-878]		0	2108.01	1.156	22.95		100	K.FFQPTEMAAQDFFQR.W
FALSE	[R].EMGEAFAADIPR.[I]	1xTMT6plex [N-Term]	0.00030973	1	1	3	O95782	O95782 [142-153]		0	1535.77	0.836	20.73		100	R.EMGEAFAADIPR.I
FALSE	[R].DFLTPPLLSVR.[F]	1xTMT6plex [N-Term]	0.00030973	1	1	1	O95782	O95782 [833-843]		0	1486.88	0.749	39.96		100	R.DFLTPPLLSVR.F
FALSE	[R].GLAVFISDIR.[N]	1xTMT6plex [N-Term]	0.00030973	2	2	1	O95782; O94973	O95782 [12-21]; O94973 [12-21]		0	1319.79	0.8	25.09	Shared	100	R.GLAVFISDIR.N
FALSE	[R].DDVQGYAAK.[T]	1xTMT6plex [K9]; 1xTMT6plex [N-Term]	0.00030973	2	2	1	O95782; O94973	O95782 [473-481]; O94973 [472-480]		0	1424.78	0.791	36.2	Shared	100	R.DDVQGYAAK.T
FALSE	[K].GPGAGSALDDGR.[R]	1xTMT6plex [N-Term]	0.00030973	1	1	2	O95782	O95782 [621-632]		0	1301.66	0.972	17.95		100	K.GPGAGSALDDGR.R
FALSE	[K].GPGAGSALDDGRR.[D]	1xTMT6plex [N-Term]	0.00030973	1	1	2	O95782	O95782 [621-633]		1	1457.77	0.881	17.42		100	K.GPGAGSALDDGRR.D
FALSE	[R].VLQIVTNR.[D]	1xTMT6plex [N-Term]	0.000568404	1	1	1	O95782	O95782 [465-472]		0	1171.74	0.921	3.66		100	R.VLQIVTNR.D
FALSE	[K].FINLFPETK.[A]	1xTMT6plex [K9]; 1xTMT6plex [N-Term]	0.000568404	1	1	1	O95782	O95782 [548-556]		0	1566.93	0.825	33.64		100	K.FINLFPETK.A
FALSE	[K].ANHPMDAEVTK.[A]	1xOxidation [M5]; 1xTMT6plex [K11]; 1xTMT6plex [N-Term]	0.000568404	1	1	3	O95782	O95782 [895-905]		0	1686.89	0.797	32.61		100	K.ANHPMDAEVTK.A
FALSE	[K].TVFEALQAPACHENMVK.[V]	1xCarbamidomethyl [C11]; 1xOxidation [M15]; 1xTMT6plex [K17]; 1xTMT6plex [N-Term]	0.000568404	1	1	1	O95782	O95782 [482-498]		0	2419.25	1.094	17.25		100	K.TVFEALQAPACHENMVK.V
FALSE	[K].VAILAEK.[Y]	1xTMT6plex [K7]; 1xTMT6plex [N-Term]	0.00115152	2	2	2	O95782; O94973	O95782 [428-434]; O94973 [427-433]		0	1201.79	0.899	24.77	Shared	100	K.VAILAEK.Y
FALSE	[R].ESSILAK.[L]	1xTMT6plex [K7]; 1xTMT6plex [N-Term]	0.00139174	2	2	1	O95782; O94973	O95782 [609-615]; O94973 [608-614]		0	1205.75	0.759	31.35	Shared	100	R.ESSILAK.L
FALSE	[K].ALDGYSK.[K]	1xTMT6plex [K7]; 1xTMT6plex [N-Term]	0.00164966	2	2	2	O95782; O94973	O95782 [49-55]; O94973 [49-55]		0	1211.7	0.778	35.16	Shared	100	K.ALDGYSK.K
FALSE	[K].LPVTINK.[F]	1xTMT6plex [K7]; 1xTMT6plex [N-Term]	0.00164966	1	1	1	O95782	O95782 [857-863]		0	1242.82	0.853	32.47		100	K.LPVTINK.F
FALSE	[R].LINNAIK.[N]	1xTMT6plex [K7]; 1xTMT6plex [N-Term]	0.00357681	2	2	1	O95782; O94973	O95782 [111-117]; O94973 [111-117]		0	1243.81	0.872	35.39	Shared	100	R.LINNAIK.N
FALSE	[K].QIVSEMLR.[Y]	1xOxidation [M6]; 1xTMT6plex [N-Term]	0.00404001	1	1	2	O95782	O95782 [404-411]		0	1220.69	0.788	8.45		100	K.QIVSEMLR.Y
FALSE	[K].TCVSLAVSR.[L]	1xCarbamidomethyl [C2]; 1xTMT6plex [N-Term]	0.00404001	1	1	1	O95782	O95782 [224-232]		0	1221.68	0.829	10.45		100	K.TCVSLAVSR.L
FALSE	[K].QIVSEMLR.[Y]	1xTMT6plex [N-Term]	0.00797596	1	1	1	O95782	O95782 [404-411]		0	1204.69	0.905	46.61		100	K.QIVSEMLR.Y
High	P19105	Myosin regulatory light chain 12A OS=Homo sapiens OX=9606 GN=MYL12A PE=1 SV=2	115.313	65	9	231	4	171	19.8	4.81	555.33	9	10627	MYL12A	20342.2	27480.7	19613	21098.6	39751.5	18997.8
Checked	Annotated Sequence	Modifications	Qvality q-value	# Protein Groups	# Proteins	# PSMs	Master Protein Accessions	Positions in Master Proteins	Modifications in Master Proteins	# Missed Cleavages	Theo. MH+ [Da]	Abundance Ratio: (HO) / (WT)	Abundances (Grouped) CV [%]: HO	Quan Info	Channel Occupancy [%]	Sequence in Protein
FALSE	[K].NPTDEYLDAMMNEAPGPINFTMFLTMFGEK.[L]	3xOxidation [M11; M22; M]; 1xTMT6plex [K30]; 1xTMT6plex [N-Term]	0.00030973	1	1	2	P19105	P19105 [63-92]		0	3930.84	1.012	6.99		100	K.NPTDEYLDAMMNEAPGPINFTMFLTMFGEK.L
FALSE	[K].LNGTDPEDVIR.[N]	1xTMT6plex [N-Term]	0.00030973	2	3	14	P24844; P19105	P24844 [94-104]; P19105 [93-103]		0	1457.78	0.686	3.41	Shared	100	K.LNGTDPEDVIR.N
FALSE	[R].ATSNVFAMFDQSQIQEFK.[E]	1xTMT6plex [K18]; 1xTMT6plex [N-Term]	0.00030973	2	3	11	P24844; P19105	P24844 [18-35]; P19105 [17-34]		0	2549.31	0.708	3.79	Shared	100	R.ATSNVFAMFDQSQIQEFK.E
FALSE	[K].EAFNMIDQNR.[D]	1xOxidation [M5]; 1xTMT6plex [N-Term]	0.00030973	2	3	66	P24844; P19105	P24844 [36-45]; P19105 [35-44]		0	1482.72	0.753	2.28	Shared	100	K.EAFNMIDQNR.D
FALSE	[K].EAFNMIDQNR.[D]	1xTMT6plex [N-Term]	0.00030973	2	3	16	P24844; P19105	P24844 [36-45]; P19105 [35-44]		0	1466.73	0.799	5.79	Shared	100	K.EAFNMIDQNR.D
FALSE	[R].FTDEEVDELYR.[E]	1xTMT6plex [N-Term]	0.00030973	1	2	24	P19105	P19105 [133-143]		0	1644.8	0.732	6.23		100	R.FTDEEVDELYR.E
FALSE	[R].ATSNVFAMFDQSQIQEFK.[E]	1xOxidation [M8]; 1xTMT6plex [K18]; 1xTMT6plex [N-Term]	0.00030973	2	3	11	P24844; P19105	P24844 [18-35]; P19105 [17-34]		0	2565.31	0.793	6.11	Shared	100	R.ATSNVFAMFDQSQIQEFK.E
FALSE	[R].ELLTTMGDR.[F]	1xTMT6plex [N-Term]	0.00030973	2	3	7	P24844; P19105	P24844 [125-133]; P19105 [124-132]		0	1264.68	0.751	12.33	Shared	100	R.ELLTTMGDR.F
FALSE	[R].ELLTTMGDRFTDEEVDELYR.[E]	1xTMT6plex [N-Term]	0.00030973	1	2	1	P19105	P19105 [124-143]		1	2661.29	0.504	29.68		100	R.ELLTTMGDRFTDEEVDELYR.E
FALSE	[K].EDLHDMLASLGK.[N]	1xOxidation [M6]; 1xTMT6plex [K12]; 1xTMT6plex [N-Term]	0.00030973	2	3	12	P24844; P19105	P24844 [52-63]; P19105 [51-62]		0	1802.97	0.812	11.14	Shared	100	K.EDLHDMLASLGK.N
FALSE	[K].EDLHDMLASLGK.[N]	1xTMT6plex [K12]; 1xTMT6plex [N-Term]	0.00030973	2	3	7	P24844; P19105	P24844 [52-63]; P19105 [51-62]		0	1786.98	0.548	2.54	Shared	100	K.EDLHDMLASLGK.N
FALSE	[K].GNFNYIEFTR.[I]	1xTMT6plex [N-Term]	0.00030973	1	2	16	P19105	P19105 [151-160]		0	1489.76	0.739	5.23		100	K.GNFNYIEFTR.I
FALSE	[R].ELLTTMGDR.[F]	1xOxidation [M6]; 1xTMT6plex [N-Term]	0.00283146	2	3	44	P24844; P19105	P24844 [125-133]; P19105 [124-132]		0	1280.67	0.763	9.22	Shared	100	R.ELLTTMGDR.F
High	P53621	Coatomer subunit alpha OS=Homo sapiens OX=9606 GN=COPA PE=1 SV=2	114.298	21	24	44	24	1224	138.3	7.66	126.84	24	1314	COPA	4104.1	4439.8	3467.5	4857.6	5357	3679.6
Checked	Annotated Sequence	Modifications	Qvality q-value	# Protein Groups	# Proteins	# PSMs	Master Protein Accessions	Positions in Master Proteins	Modifications in Master Proteins	# Missed Cleavages	Theo. MH+ [Da]	Abundance Ratio: (HO) / (WT)	Abundances (Grouped) CV [%]: HO	Quan Info	Channel Occupancy [%]	Sequence in Protein
FALSE	[K].NGVPAVGLK.[L]	1xTMT6plex [K9]; 1xTMT6plex [N-Term]	0.00030973	1	1	2	P53621	P53621 [994-1002]		0	1312.84	0.855	20.19		100	K.NGVPAVGLK.L
FALSE	[R].QELILSNSEDK.[S]	1xTMT6plex [K11]; 1xTMT6plex [N-Term]	0.00030973	1	1	3	P53621	P53621 [261-271]		0	1733.97	0.955	14.57		100	R.QELILSNSEDK.S
FALSE	[R].QLDFNSSK.[D]	1xTMT6plex [K8]; 1xTMT6plex [N-Term]	0.00030973	1	1	1	P53621	P53621 [343-350]		0	1396.78	0.858	26.03		100	R.QLDFNSSK.D
FALSE	[K].NLSPGAVESDVR.[G]	1xTMT6plex [N-Term]	0.00030973	1	1	4	P53621	P53621 [171-182]		0	1472.79	0.931	7.3		100	K.NLSPGAVESDVR.G
FALSE	[R].LLELGPKPEVAQQTR.[K]	1xTMT6plex [K7]; 1xTMT6plex [N-Term]	0.00030973	1	1	1	P53621	P53621 [1128-1142]		0	2137.27	0.831	27.43		100	R.LLELGPKPEVAQQTR.K
FALSE	[R].TLDLPIYVTR.[V]	1xTMT6plex [N-Term]	0.00030973	1	1	1	P53621	P53621 [563-572]		0	1419.84	0.775	44.18		100	R.TLDLPIYVTR.V
FALSE	[R].VTTVTEIGK.[D]	1xTMT6plex [K9]; 1xTMT6plex [N-Term]	0.00030973	1	1	1	P53621	P53621 [1203-1211]		0	1405.87	0.842	36.47		100	R.VTTVTEIGK.D
FALSE	[K].VQVPNCDEIFYAGTGNLLLR.[D]	1xCarbamidomethyl [C6]; 1xTMT6plex [N-Term]	0.00030973	1	1	1	P53621	P53621 [448-467]		0	2508.31	0.878	24.08		100	K.VQVPNCDEIFYAGTGNLLLR.D
FALSE	[R].SILLSVPLLVVDNK.[Q]	1xTMT6plex [K14]; 1xTMT6plex [N-Term]	0.00030973	1	1	1	P53621	P53621 [1031-1044]		0	1968.25	1.181	39.38		100	R.SILLSVPLLVVDNK.Q
[truncated: 3,796 more rows]

## Sheet: S2
DEG analysis of WT and CENT hMSCs at early passage
Gene	baseMean	log2FoldChange	lfcSE	stat	pvalue	padj
DDX11L16	1.12382	0.140562	1.46134	0.0961873	0.923372	NA
DDX11L1	0	NA	NA	NA	NA	NA
WASH7P	56.2314	-0.0392054	0.205314	-0.190954	0.848562	0.980196
MIR6859-1	0	NA	NA	NA	NA	NA
MIR1302-2HG	0.995601	-0.0402306	1.43147	-0.0281045	0.977579	NA
MIR1302-2	0	NA	NA	NA	NA	NA
FAM138A	0	NA	NA	NA	NA	NA
ENSG00000308361	0	NA	NA	NA	NA	NA
ENSG00000290826	0	NA	NA	NA	NA	NA
OR4G4P	0	NA	NA	NA	NA	NA
OR4G11P	0	NA	NA	NA	NA	NA
OR4F5	0	NA	NA	NA	NA	NA
ENSG00000241860	0.777259	1.15353	1.66568	0.692529	0.488605	NA
ENSG00000239945	0	NA	NA	NA	NA	NA
ENSG00000308314	0	NA	NA	NA	NA	NA
CICP27	0.935566	1.35411	1.57807	0.85808	0.390848	NA
ENSG00000308579	3.35001	0.0062993	0.867919	0.00725793	0.994209	NA
ENSG00000268903	0.12005	0.560661	3.53381	0.158656	0.87394	NA
ENSG00000269981	5.90911	0.372645	0.585093	0.636899	0.52419	NA
ENSG00000239906	0	NA	NA	NA	NA	NA
ENSG00000310528	0	NA	NA	NA	NA	NA
RNU6-1100P	0.153803	-0.882012	3.53381	-0.249592	0.802903	NA
ENSG00000241599	0	NA	NA	NA	NA	NA
DDX11L2	1.606	0.477392	1.16741	0.408933	0.682588	NA
WASH9P	25.913	-0.147197	0.317799	-0.463176	0.643238	0.938999
DDX11L17	0.251368	1.31386	2.96899	0.442529	0.658107	NA
MIR6859-2	0	NA	NA	NA	NA	NA
ENSG00000308625	0.161254	-0.882012	3.53381	-0.249592	0.802903	NA
ENSG00000308544	0	NA	NA	NA	NA	NA
ENSG00000292994	0.609176	1.52568	1.85989	0.820306	0.412042	NA
ENSG00000228463	0	NA	NA	NA	NA	NA
ENSG00000306775	0	NA	NA	NA	NA	NA
ENSG00000286448	0.275684	-1.63078	2.87171	-0.56788	0.570116	NA
RPL23AP24	0.368709	-0.867496	2.35641	-0.368143	0.712766	NA
ENSG00000236601	0	NA	NA	NA	NA	NA
ENSG00000290385	32.183	0.108356	0.280503	0.386294	0.699279	0.956163
WBP1LP7	0	NA	NA	NA	NA	NA
OR4F29	0	NA	NA	NA	NA	NA
ENSG00000237094	0	NA	NA	NA	NA	NA
CICP7	0.105453	-0.882012	3.53381	-0.249592	0.802903	NA
ENSG00000250575	0.644399	0.494985	1.89456	0.261267	0.793887	NA
U6	4.19501	0.29618	0.795519	0.37231	0.709662	NA
ENSG00000293331	0.210907	-1.49878	3.52627	-0.425034	0.670812	NA
LINC00115	55.3053	0.239266	0.20113	1.18961	0.234201	0.74579
ENSG00000235146	0.113776	0.560661	3.53381	0.158656	0.87394	NA
MTND1P23	0.428833	-1.00042	2.29041	-0.436786	0.662267	NA
MTND2P28	109.046	0.305834	0.209164	1.46217	0.143694	0.635343
MTCO1P12	134.041	0.166875	0.143553	1.16246	0.245048	0.751541
ENSG00000278791	0	NA	NA	NA	NA	NA
MTCO2P12	12.1238	0.0582417	0.392505	0.148385	0.882039	0.986879
MTATP8P1	0.12005	0.560661	3.53381	0.158656	0.87394	NA
MTATP6P1	1268.23	-0.294705	0.0937516	-3.14347	0.0016696	0.0429541
MTCO3P12	3.66873	-0.525536	0.751023	-0.69976	0.484077	NA
WBP1LP6	0	NA	NA	NA	NA	NA
OR4F16	0	NA	NA	NA	NA	NA
ENSG00000230021	0	NA	NA	NA	NA	NA
CICP3	0.796049	-1.4267	1.77308	-0.804646	0.421024	NA
RNU6-1199P	0.435008	1.07682	2.23407	0.481998	0.629807	NA
ENSG00000229905	0.11443	-0.882012	3.53381	-0.249592	0.802903	NA
ENSG00000228327	0	NA	NA	NA	NA	NA
LINC01409	16.3922	0.184488	0.365123	0.505277	0.613364	0.930958
ENSG00000285268	0	NA	NA	NA	NA	NA
ENSG00000230092	0	NA	NA	NA	NA	NA
FAM87B	6.87133	0.138286	0.584507	0.236586	0.812978	NA
LINC01128	92.0165	-0.0371168	0.164646	-0.225433	0.821642	0.975091
ENSG00000297178	1.73876	0.655567	1.06649	0.614697	0.538755	NA
ENSG00000297224	0.210907	-1.49878	3.52627	-0.425034	0.670812	NA
FAM41C	0	NA	NA	NA	NA	NA
TUBB8P11	0	NA	NA	NA	NA	NA
ENSG00000283040	0	NA	NA	NA	NA	NA
ENSG00000296088	0	NA	NA	NA	NA	NA
ENSG00000272438	29.5402	0.690595	0.283468	2.43624	0.0148408	0.200953
ENSG00000298603	1.63578	1.30587	1.22813	1.0633	0.287646	NA
LINC02593	31.9469	0.434505	0.302703	1.43542	0.151168	0.64837
SAMD11	108.326	0.50198	0.180382	2.78286	0.00538814	0.100598
NOC2L	746.248	-0.0377947	0.0846511	-0.446476	0.655253	0.943311
KLHL17	228.083	0.0846679	0.104685	0.808788	0.418637	0.860793
PLEKHN1	26.4904	0.104757	0.283222	0.369877	0.711474	0.959186
PERM1	0.435662	-0.13327	2.09402	-0.0636431	0.949254	NA
ENSG00000303599	0.22886	-1.56589	3.52319	-0.444453	0.656715	NA
ENSG00000272512	1.37457	0.946437	1.26662	0.747212	0.454936	NA
HES4	42.0469	0.12154	0.25411	0.478294	0.632441	0.93794
ENSG00000303623	4.91424	0.0258545	0.65492	0.0394773	0.96851	NA
ISG15	231.879	0.479098	0.18012	2.65988	0.00781687	0.130426
ENSG00000303614	1.47216	-0.0998941	1.14586	-0.0871783	0.93053	NA
ENSG00000231702	0	NA	NA	NA	NA	NA
ENSG00000224969	1.59972	4.02603	1.40504	2.86543	0.00416445	NA
AGRN	5324.33	-0.0784973	0.106859	-0.734586	0.462592	0.880229
ENSG00000242590	0	NA	NA	NA	NA	NA
ENSG00000291156	12.4062	0.235836	0.430286	0.548091	0.583629	0.918392
ENSG00000273443	4.59516	0.310404	0.697785	0.444842	0.656434	NA
ENSG00000217801	2.6188	-0.6327	0.869071	-0.728019	0.466602	NA
ENSG00000304119	2.609	-1.11488	0.905439	-1.23132	0.218204	NA
ENSG00000304169	0.475035	-0.17243	2.05502	-0.0839069	0.93313	NA
RNF223	0.767894	-2.17933	1.7448	-1.24904	0.21165	NA
C1orf159	127.953	0.0104197	0.155404	0.067049	0.946543	0.995393
ENSG00000285812	12.6591	0.238025	0.421777	0.564338	0.572524	0.915158
ENSG00000299943	0	NA	NA	NA	NA	NA
LINC01342	0	NA	NA	NA	NA	NA
ENSG00000304965	2.02073	0.978426	1.01863	0.960534	0.336786	NA
MIR200B	0	NA	NA	NA	NA	NA
MIR200A	0	NA	NA	NA	NA	NA
MIR429	0	NA	NA	NA	NA	NA
ENSG00000272141	0	NA	NA	NA	NA	NA
TTLL10-AS1	0.105453	-0.882012	3.53381	-0.249592	0.802903	NA
TTLL10	0	NA	NA	NA	NA	NA
TNFRSF18	1.79036	-1.49088	1.20791	-1.23426	0.217105	NA
TNFRSF4	0.809897	0.168507	1.74419	0.0966106	0.923036	NA
ENSG00000304412	0	NA	NA	NA	NA	NA
SDF4	982.759	-0.222124	0.0976004	-2.27585	0.0228548	0.264819
B3GALT6	502.429	-0.196715	0.113773	-1.72901	0.083807	0.514303
C1QTNF12	15.8481	0.192854	0.379343	0.50839	0.61118	0.930157
ENSG00000260179	5.74229	-0.508577	0.616872	-0.824444	0.409687	NA
UBE2J2	509.183	-0.163129	0.0796213	-2.04882	0.0404802	0.370596
LINC01786	17.6698	-0.0045026	0.381585	-0.0117997	0.990585	0.999969
SCNN1D	58.4216	0.10476	0.188444	0.55592	0.578266	0.916946
ACAP3	533.889	-0.0547208	0.112862	-0.484846	0.627785	0.936789
MIR6726	0	NA	NA	NA	NA	NA
PUSL1	92.7391	-0.0878134	0.155448	-0.564905	0.572139	0.915051
INTS11	667.726	-0.0544442	0.0750125	-0.725801	0.467961	0.880653
MIR6727	0	NA	NA	NA	NA	NA
ENSG00000240731	34.3097	0.27322	0.237875	1.14859	0.250726	0.75889
CPTP	237.046	-0.188328	0.10818	-1.74088	0.0817048	0.510789
TAS1R3	29.7739	0.392432	0.269312	1.45716	0.145071	0.638641
DVL1	735.216	0.00802791	0.073308	0.109509	0.912799	0.991268
MIR6808	0	NA	NA	NA	NA	NA
ENSG00000304860	6.89088	-0.0363412	0.522367	-0.0695702	0.944536	NA
MXRA8	1720.31	-0.231899	0.079538	-2.91557	0.00355037	0.0740262
AURKAIP1	585.953	-0.209851	0.1038	-2.02169	0.0432085	0.381081
NDUFB4P8	0.225503	-0.160671	3.07466	-0.0522566	0.958324	NA
CCNL2	1057.87	0.0263551	0.0591152	0.445827	0.655723	0.943311
MRPL20-AS1	97.476	-0.0605076	0.146692	-0.41248	0.679988	0.950797
MRPL20	270.02	-0.252968	0.132151	-1.91424	0.05559	0.431084
RN7SL657P	0	NA	NA	NA	NA	NA
ENSG00000301639	6.36637	0.418342	0.562899	0.743192	0.457365	NA
MRPL20-DT	16.537	-0.546695	0.363473	-1.50409	0.132559	0.622273
ANKRD65	0.701087	1.7984	1.79642	1.00111	0.316776	NA
ANKRD65-AS1	1.06793	1.6908	1.63927	1.03144	0.302336	NA
TMEM88B	3.32118	0.423847	0.893318	0.474464	0.635169	NA
LINC01770	4.13977	0.145959	0.700905	0.208244	0.835039	NA
VWA1	221.045	-0.072987	0.11983	-0.609088	0.542466	0.904944
ATAD3C	0.441935	-0.127463	2.08662	-0.0610858	0.951291	NA
ATAD3B	125.475	0.00850434	0.132047	0.064404	0.948649	0.995636
ENSG00000290916	0.461378	2.25963	2.44695	0.923446	0.355775	NA
ENSG00000284740	0	NA	NA	NA	NA	NA
ATAD3A	392.616	-0.0663058	0.0911536	-0.727407	0.466977	0.880653
TMEM240	39.3542	-0.185021	0.264483	-0.699558	0.484203	0.883781
ENSG00000299413	0.291396	-0.16067	2.82667	-0.0568409	0.954672	NA
SSU72	895.817	-0.0367546	0.0665443	-0.552333	0.58072	0.917548
SSU72-AS1	5.13167	0.352416	0.641409	0.54944	0.582704	NA
ENSG00000274481	0	NA	NA	NA	NA	NA
FNDC10	113.241	0.00697561	0.162617	0.0428961	0.965784	0.997963
ENSG00000286989	5.82159	0.591666	0.645654	0.916382	0.359467	NA
ENSG00000272106	33.9805	-0.108365	0.257491	-0.420851	0.673864	0.948936
MIB2	416.82	-0.0644309	0.115908	-0.555878	0.578294	0.916946
MMP23B	13.275	-0.495856	0.422193	-1.17448	0.240205	0.749603
CDK11B	218.714	-0.150206	0.122892	-1.22226	0.221608	0.73381
ENSG00000272004	4.59454	-0.293977	0.674976	-0.435537	0.663172	NA
SLC35E2B	1232.16	-0.0757644	0.0645004	-1.17464	0.240141	0.749557
ENSG00000293187	28.7654	0.191461	0.29125	0.657375	0.51094	0.891487
ENSG00000269737	9.45576	0.157521	0.453187	0.347584	0.728153	0.962237
ENSG00000310190	1.72861	0.67306	1.08115	0.622539	0.533588	NA
ENSG00000310238	0	NA	NA	NA	NA	NA
MMP23A	0	NA	NA	NA	NA	NA
CDK11A	5.87407	0.720206	0.593394	1.21371	0.22486	NA
ENSG00000268575	62.1603	0.0251098	0.196128	0.128028	0.898127	0.989452
ENSG00000293188	183.903	0.15032	0.121134	1.24094	0.214627	0.72607
ENSG00000290854	71.8655	-0.252019	0.198373	-1.27043	0.203931	0.715551
SLC35E2A	0	NA	NA	NA	NA	NA
ENSG00000227775	0	NA	NA	NA	NA	NA
NADK	498.243	-0.090981	0.110173	-0.825799	0.408918	0.859523
ENSG00000302550	6.65409	0.402045	0.561218	0.71638	0.473757	NA
GNB1	5224.8	-0.0430786	0.0671426	-0.641599	0.521134	0.895538
GNB1-DT	2.49738	1.0394	0.958501	1.0844	0.278189	NA
ENSG00000303984	1.04667	1.68252	1.44646	1.1632	0.244749	NA
ENSG00000294910	1.13739	0.15419	1.3103	0.117676	0.906325	NA
ENSG00000306476	0.441281	1.09973	2.0279	0.542302	0.587611	NA
CALML6	0.83755	-1.40016	1.75692	-0.796938	0.425487	NA
TMEM52	4.26211	0.790955	0.678126	1.16638	0.24346	NA
CFAP74	0	NA	NA	NA	NA	NA
ENSG00000233542	0	NA	NA	NA	NA	NA
GABRD	0	NA	NA	NA	NA	NA
ENSG00000304958	0	NA	NA	NA	NA	NA
PRKCZ-DT	0	NA	NA	NA	NA	NA
PRKCZ	10.1703	0.0928325	0.43011	0.215835	0.829117	0.976506
ENSG00000308181	0	NA	NA	NA	NA	NA
ENSG00000271806	0.509664	1.25768	2.1662	0.580593	0.561515	NA
PRKCZ-AS1	18.1476	0.481589	0.330613	1.45665	0.145212	0.639077
FAAP20	337.112	-0.152257	0.103242	-1.47476	0.140278	0.632293
ENSG00000304038	2.29224	0.443556	0.942402	0.470665	0.63788	NA
ENSG00000234396	0.85738	1.13902	1.61717	0.704329	0.481228	NA
ENSG00000304143	1.6262	1.26345	1.15953	1.08962	0.275881	NA
SKI	2130.03	-0.0312312	0.0552389	-0.565384	0.571813	0.915051
ENSG00000295493	1.91209	0.235052	1.07516	0.218619	0.826947	NA
ENSG00000287356	19.5996	0.127154	0.323032	0.393627	0.693856	0.954384
MORN1	27.9137	-0.291253	0.275679	-1.05649	0.290743	0.786734
ENSG00000272161	0.153803	-0.882012	3.53381	-0.249592	0.802903	NA
ENSG00000292993	6.52896	-0.277779	0.560069	-0.495973	0.619914	NA
ENSG00000269896	0	NA	NA	NA	NA	NA
ENSG00000272420	3.33421	0.209768	0.826967	0.253659	0.799759	NA
ENSG00000295371	3.86813	0.319673	0.784256	0.407612	0.683558	NA
RER1	944.032	-0.135989	0.0697465	-1.94977	0.0512039	0.41452
PEX10	146.068	-0.152409	0.129513	-1.17679	0.239281	0.748582
PLCH2	0.450501	-0.0981289	2.27596	-0.0431154	0.96561	NA
ENSG00000224387	0	NA	NA	NA	NA	NA
ENSG00000229393	0	NA	NA	NA	NA	NA
PANK4	0	NA	NA	NA	NA	NA
HES5	0	NA	NA	NA	NA	NA
ENSG00000272449	0	NA	NA	NA	NA	NA
TNFRSF14-AS1	0.275684	-1.63078	2.87171	-0.56788	0.570116	NA
ENSG00000307979	0	NA	NA	NA	NA	NA
TNFRSF14	0	NA	NA	NA	NA	NA
ENSG00000225931	0	NA	NA	NA	NA	NA
ENSG00000307958	0	NA	NA	NA	NA	NA
ENSG00000228037	0	NA	NA	NA	NA	NA
ENSG00000289610	0	NA	NA	NA	NA	NA
PRXL2B	0.161254	-0.882012	3.53381	-0.249592	0.802903	NA
MMEL1	0	NA	NA	NA	NA	NA
MMEL1-AS1	0	NA	NA	NA	NA	NA
TTC34	2.23161	-1.04564	0.968588	-1.07955	0.280344	NA
ENSG00000285945	0	NA	NA	NA	NA	NA
ENSG00000283259	0	NA	NA	NA	NA	NA
ENSG00000233234	0	NA	NA	NA	NA	NA
ENSG00000287396	0	NA	NA	NA	NA	NA
ENSG00000231630	0	NA	NA	NA	NA	NA
ENSG00000302855	0	NA	NA	NA	NA	NA
ENSG00000295089	0	NA	NA	NA	NA	NA
ENSG00000300015	0	NA	NA	NA	NA	NA
ENSG00000284745	0	NA	NA	NA	NA	NA
ACTRT2	0	NA	NA	NA	NA	NA
PRDM16-DT	52.171	0.349264	0.207106	1.6864	0.0917181	0.536076
PRDM16	346.976	0.313207	0.0968418	3.23421	0.00121979	0.0339728
MIR4251	0.233826	1.31326	3.03607	0.432552	0.66534	NA
ENSG00000226286	2.68074	0.157257	0.842021	0.186761	0.851848	NA
ENSG00000306427	0.885608	-0.555365	1.50918	-0.36799	0.71288	NA
ENSG00000279839	6.19391	0.688021	0.607078	1.13333	0.257075	NA
ENSG00000306439	1.28404	-0.753734	1.21784	-0.618913	0.535974	NA
ENSG00000272235	14.6414	0.439024	0.376263	1.1668	0.243291	0.750526
ENSG00000287828	12.9391	0.330108	0.417066	0.791502	0.428651	0.864496
ENSG00000286518	4.30746	0.395427	0.755699	0.523259	0.600794	NA
ENSG00000295754	0.12005	0.560661	3.53381	0.158656	0.87394	NA
ENSG00000297626	0	NA	NA	NA	NA	NA
ARHGEF16	26.8195	-0.0869897	0.300971	-0.28903	0.772558	0.968357
ENSG00000272088	0.113776	0.560661	3.53381	0.158656	0.87394	NA
MEGF6	51.0054	0.931234	0.223522	4.16618	3.09749e-05	0.00172856
MIR551A	0	NA	NA	NA	NA	NA
ENSG00000309127	0	NA	NA	NA	NA	NA
ENSG00000238260	3.02044	-0.948396	0.895656	-1.05888	0.289653	NA
TPRG1L	322.642	-0.0819563	0.0906619	-0.903977	0.366008	0.834122
WRAP73	109.31	-0.0513385	0.163965	-0.313106	0.7542	0.965732
TP73	4.08937	0.0738282	0.71769	0.102869	0.918067	NA
TP73-AS3	0	NA	NA	NA	NA	NA
TP73-AS2	0	NA	NA	NA	NA	NA
GFOD3P	289.163	-0.202038	0.0961421	-2.10145	0.0356016	0.343694
ENSG00000276189	0	NA	NA	NA	NA	NA
CCDC27	0.834847	-1.38405	1.62835	-0.849973	0.39534	NA
ENSG00000296834	0	NA	NA	NA	NA	NA
SMIM1	13.8642	-0.0168944	0.385114	-0.0438686	0.965009	0.997963
LRRC47	567.345	-0.078514	0.0977332	-0.80335	0.421773	0.861985
RN7SL574P	2.15702	0.0124973	0.953301	0.0131095	0.98954	NA
ENSG00000272153	6.96483	-0.495958	0.566018	-0.876223	0.380909	NA
CEP104	444.844	-0.0761325	0.0905863	-0.840442	0.400661	0.855126
DFFB	72.1323	-0.0134765	0.175134	-0.0769495	0.938664	0.995091
C1orf174	248.117	0.0933315	0.108201	0.862576	0.388371	0.845404
LINC01134	4.54688	-0.248012	0.728477	-0.340452	0.733516	NA
LINC01346	0	NA	NA	NA	NA	NA
LINC01345	0	NA	NA	NA	NA	NA
LINC02780	0	NA	NA	NA	NA	NA
ENSG00000284703	0.102002	0.560661	3.53381	0.158656	0.87394	NA
ENSG00000296871	0	NA	NA	NA	NA	NA
ENSG00000308587	0	NA	NA	NA	NA	NA
EEF1DP6	0	NA	NA	NA	NA	NA
ENSG00000301255	0	NA	NA	NA	NA	NA
ENSG00000299169	0	NA	NA	NA	NA	NA
ENSG00000302287	0	NA	NA	NA	NA	NA
LINC01777	0	NA	NA	NA	NA	NA
ENSG00000306535	0	NA	NA	NA	NA	NA
ENSG00000284694	0.12005	0.560661	3.53381	0.158656	0.87394	NA
ENSG00000299517	0	NA	NA	NA	NA	NA
ENSG00000227169	0	NA	NA	NA	NA	NA
ENSG00000295490	0	NA	NA	NA	NA	NA
LINC01646	0	NA	NA	NA	NA	NA
ENSG00000300565	0	NA	NA	NA	NA	NA
ENSG00000303830	0	NA	NA	NA	NA	NA
AJAP1	0.341983	0.569389	2.73636	0.208082	0.835165	NA
ENSG00000287586	0	NA	NA	NA	NA	NA
ENSG00000284739	0	NA	NA	NA	NA	NA
LINC02781	0	NA	NA	NA	NA	NA
ENSG00000309102	0	NA	NA	NA	NA	NA
ENSG00000309111	0	NA	NA	NA	NA	NA
LINC02782	0	NA	NA	NA	NA	NA
ENSG00000296716	0	NA	NA	NA	NA	NA
ENSG00000302269	0	NA	NA	NA	NA	NA
ENSG00000306645	0	NA	NA	NA	NA	NA
ENSG00000284616	0	NA	NA	NA	NA	NA
ENSG00000302445	0	NA	NA	NA	NA	NA
ENSG00000302452	0	NA	NA	NA	NA	NA
ENSG00000295735	0	NA	NA	NA	NA	NA
ENSG00000284692	0	NA	NA	NA	NA	NA
ENSG00000284666	0	NA	NA	NA	NA	NA
ENSG00000260972	0	NA	NA	NA	NA	NA
ENSG00000299325	0	NA	NA	NA	NA	NA
ENSG00000283356	0	NA	NA	NA	NA	NA
ENSG00000289893	0	NA	NA	NA	NA	NA
ENSG00000264341	0	NA	NA	NA	NA	NA
ENSG00000295108	0	NA	NA	NA	NA	NA
ENSG00000295122	0.113776	0.560661	3.53381	0.158656	0.87394	NA
ENSG00000298180	0	NA	NA	NA	NA	NA
MIR4689	0	NA	NA	NA	NA	NA
NPHP4	189.27	-0.0242103	0.123011	-0.196814	0.843973	0.979377
ENSG00000299539	0.341329	1.82642	3.15503	0.57889	0.562663	NA
KCNAB2	93.7016	0.177931	0.169439	1.05012	0.293664	0.790062
CHD5	1.94919	0.534828	1.10002	0.4862	0.626825	NA
ENSG00000285629	0	NA	NA	NA	NA	NA
RPL22	780.948	-0.123608	0.0699217	-1.7678	0.0770937	0.496741
RNF207-AS1	6.12931	-0.702133	0.603061	-1.16428	0.24431	NA
RNF207	114.636	-0.159192	0.142551	-1.11674	0.264108	0.766958
ICMT	1292.72	0.0805674	0.0573699	1.40435	0.160215	0.660705
ICMT-DT	1.03702	0.192738	1.37362	0.140314	0.888412	NA
HES3	0.161254	-0.882012	3.53381	-0.249592	0.802903	NA
GPR153	106.517	-0.0510534	0.158222	-0.32267	0.746945	0.964269
ACOT7	512.403	-0.0620282	0.11044	-0.561645	0.574358	0.915679
ENSG00000271746	1.44399	0.0186014	1.23204	0.015098	0.987954	NA
HES2	1.5737	2.31883	1.33353	1.73887	0.0820584	NA
ESPN	2.00225	-0.500438	1.22425	-0.408771	0.682708	NA
MIR4252	0	NA	NA	NA	NA	NA
ENSG00000231868	0	NA	NA	NA	NA	NA
TNFRSF25	122.073	0.160611	0.140509	1.14306	0.253013	0.75889
PLEKHG5	591.104	0.0647289	0.0693974	0.932728	0.350961	0.826706
ENSG00000297749	2.60882	-0.0594353	0.889581	-0.0668127	0.946731	NA
ENSG00000299237	2.95821	0.511054	0.878313	0.581859	0.560662	NA
ENSG00000299253	2.94547	0.239078	0.846338	0.282486	0.777571	NA
NOL9	900.027	0.0930355	0.0625504	1.48737	0.136918	0.628446
RNU6-731P	1.67031	1.09705	1.26573	0.866734	0.386088	NA
ENSG00000229519	8.85261	0.0538267	0.462719	0.116327	0.907393	0.99069
TAS1R1	1.18312	-1.22873	1.44555	-0.850007	0.395321	NA
ZBTB48	89.1605	-0.0719312	0.152944	-0.470311	0.638133	0.938151
KLHL21	376.073	-0.0734359	0.092783	-0.791481	0.428664	0.864496
ENSG00000295286	3.24382	-0.425682	0.846707	-0.50275	0.61514	NA
ENSG00000304810	2.94067	0.491228	0.902847	0.544088	0.586381	NA
PHF13	476.819	0.000228524	0.0827048	0.00276313	0.997795	0.999969
THAP3	103.9	-0.19293	0.147977	-1.30378	0.192308	0.701692
DNAJC11	358.219	-0.114597	0.0973942	-1.17663	0.239344	0.748582
LINC01672	0	NA	NA	NA	NA	NA
ENSG00000284744	0	NA	NA	NA	NA	NA
CAMTA1-DT	2.86796	0.673166	0.882235	0.763024	0.445449	NA
CAMTA1	288.35	0.0464178	0.091486	0.507376	0.611891	0.930157
ENSG00000227950	1.59845	-0.708666	1.13118	-0.626481	0.530999	NA
CAMTA1-AS3	0	NA	NA	NA	NA	NA
RNU1-8P	0	NA	NA	NA	NA	NA
ENSG00000310450	0	NA	NA	NA	NA	NA
CAMTA1-IT1	0.592288	0.335423	1.91933	0.174761	0.861267	NA
CAMTA1-AS2	0.215779	1.24799	3.11328	0.400859	0.688524	NA
ENSG00000294314	0.339279	0.586949	2.41944	0.242597	0.808318	NA
CAMTA1-AS1	0	NA	NA	NA	NA	NA
ENSG00000298973	0	NA	NA	NA	NA	NA
ENSG00000306883	0.153803	-0.882012	3.53381	-0.249592	0.802903	NA
ENSG00000302704	0	NA	NA	NA	NA	NA
ENSG00000270171	0.12005	0.560661	3.53381	0.158656	0.87394	NA
ENSG00000270035	0.113776	0.560661	3.53381	0.158656	0.87394	NA
ENSG00000269978	0.629492	-1.8774	1.85279	-1.01328	0.310926	NA
ENSG00000300603	0.102002	0.560661	3.53381	0.158656	0.87394	NA
VAMP3	1411.39	-0.0383386	0.0545514	-0.702797	0.482182	0.883399
ENSG00000269925	7.86996	-0.426893	0.505294	-0.84484	0.3982	0.853471
PER3	106.24	0.50822	0.165115	3.07797	0.00208419	0.0509436
ENSG00000236266	2.12349	0.14115	1.05042	0.134375	0.893106	NA
UTS2	0.664799	1.74141	2.32126	0.7502	0.453134	NA
ENSG00000302605	0.495905	1.11417	2.16282	0.515144	0.606453	NA
TNFRSF9	76.0503	0.0792915	0.234475	0.338165	0.735238	0.963655
ENSG00000270330	0	NA	NA	NA	NA	NA
PARK7	1123.04	-0.0840613	0.0652438	-1.28842	0.1976	0.7074
ENSG00000299004	0.666691	0.799131	1.83659	0.435116	0.663478	NA
Y_RNA	303.948	0.0831134	0.115748	0.718055	0.472723	0.882315
ENSG00000284747	10.9541	0.230022	0.453254	0.507489	0.611812	0.930157
ENSG00000284716	0.441935	-0.127463	2.08662	-0.0610858	0.951291	NA
ERRFI1	2745.09	0.423386	0.0504943	8.38482	5.08013e-17	3.35267e-14
ERRFI1-DT	3.7592	0.349765	0.802175	0.43602	0.662822	NA
RPL7AP18	0	NA	NA	NA	NA	NA
ENSG00000301325	0.471584	1.04289	2.18328	0.477671	0.632885	NA
LINC01714	1.45548	-0.932901	1.26729	-0.736138	0.461647	NA
ENSG00000229305	0.255806	-0.160671	2.94899	-0.0544833	0.95655	NA
ENSG00000301344	0.427656	-1.02498	2.57422	-0.398173	0.690503	NA
RNU1-7P	0	NA	NA	NA	NA	NA
ENSG00000233645	0	NA	NA	NA	NA	NA
ENSG00000298156	0.281303	-0.16067	2.85904	-0.0561974	0.955185	NA
ENSG00000301025	0	NA	NA	NA	NA	NA
ENSG00000301006	0	NA	NA	NA	NA	NA
RNU6-991P	0	NA	NA	NA	NA	NA
SLC45A1	24.5467	0.0916376	0.28312	0.323671	0.746187	0.96419
RERE	1138.94	0.0300484	0.0683246	0.439789	0.66009	0.944524
RERE-AS1	1.47647	0.283256	1.24465	0.227578	0.819975	NA
ENSG00000221083	0.345048	0.536793	2.40444	0.223251	0.82334	NA
ENSG00000270282	0.324683	-0.785689	2.77286	-0.28335	0.776908	NA
RPL7P11	1.18161	0.727848	1.50811	0.482622	0.629364	NA
RPL7P7	1.63233	-0.285038	1.30183	-0.218952	0.826687	NA
ENSG00000303676	2.29625	1.01554	0.961702	1.05598	0.290976	NA
ENSG00000226545	1.57171	-1.78859	1.29863	-1.37729	0.168421	NA
ENSG00000228423	1.20248	-0.714423	1.53254	-0.46617	0.641094	NA
RPL23AP19	0	NA	NA	NA	NA	NA
ENO1	15949.1	0.162862	0.0779731	2.08869	0.0367357	0.349819
MIR6728	0.705078	0.909049	1.71133	0.531194	0.595284	NA
ENO1-AS1	4.34864	0.459096	0.765641	0.599623	0.548757	NA
RNU6-304P	0.27503	-0.160671	2.88003	-0.0557878	0.955511	NA
HMGN2P17	0.137592	0.560661	3.53381	0.158656	0.87394	NA
ENSG00000310107	0	NA	NA	NA	NA	NA
ENSG00000232208	0	NA	NA	NA	NA	NA
ENSG00000232663	0	NA	NA	NA	NA	NA
ENSG00000310124	0	NA	NA	NA	NA	NA
CA6	0	NA	NA	NA	NA	NA
ENSG00000290109	0	NA	NA	NA	NA	NA
RN7SL451P	0	NA	NA	NA	NA	NA
SLC2A7	0	NA	NA	NA	NA	NA
SLC2A5	1.02072	0.893221	1.52013	0.587593	0.556805	NA
ENSG00000252404	0	NA	NA	NA	NA	NA
GPR157	92.5059	0.00626163	0.168049	0.0372608	0.970277	0.998048
MIR34AHG	173.582	0.0291005	0.115926	0.251026	0.801794	0.972462
MIR34A	0	NA	NA	NA	NA	NA
ENSG00000289914	10.4354	-0.0614342	0.471763	-0.130223	0.89639	0.989206
ENSG00000302015	6.78529	-0.454109	0.559515	-0.811611	0.417015	NA
LNCTAM34A	44.1841	0.420485	0.215492	1.95128	0.0510237	0.413502
ENSG00000301983	0.493736	-1.41191	1.97954	-0.713252	0.47569	NA
ENSG00000301968	3.93165	-0.445552	0.726686	-0.613129	0.539791	NA
H6PD	1834.64	-0.0279028	0.0733438	-0.380439	0.70362	0.957097
ENSG00000302217	7.06432	0.658697	0.558659	1.17907	0.238371	0.748582
SPSB1	634.339	0.155583	0.0920196	1.69076	0.090883	0.533867
ENSG00000294252	6.93344	0.37878	0.566717	0.668375	0.503894	NA
ENSG00000296073	4.00021	1.00301	0.766596	1.30839	0.190741	NA
ENSG00000296056	3.18576	0.766631	0.791773	0.968247	0.332921	NA
ENSG00000307568	0	NA	NA	NA	NA	NA
ENSG00000284652	2.60064	-0.326786	0.905565	-0.360864	0.718201	NA
LINC02606	21.4866	0.28048	0.311106	0.901557	0.367292	0.834898
RNA5SP40	0	NA	NA	NA	NA	NA
ENSG00000301013	0.153803	-0.882012	3.53381	-0.249592	0.802903	NA
ENSG00000301030	0	NA	NA	NA	NA	NA
ENSG00000306844	0	NA	NA	NA	NA	NA
ENSG00000296249	0	NA	NA	NA	NA	NA
ENSG00000235263	0	NA	NA	NA	NA	NA
SLC25A33	72.0084	-0.146057	0.175786	-0.830878	0.406043	0.858956
ENSG00000231181	0.85738	1.13902	1.61717	0.704329	0.481228	NA
TMEM201	234.278	0.0113918	0.109072	0.104443	0.916818	0.991438
ENSG00000307011	0	NA	NA	NA	NA	NA
PIK3CD	808.327	-0.0929006	0.0802903	-1.15706	0.247248	0.754792
PIK3CD-AS1	1.19167	-0.631525	1.32633	-0.476146	0.633971	NA
ENSG00000233268	0.225503	-0.160671	3.07466	-0.0522566	0.958324	NA
ENSG00000301080	0	NA	NA	NA	NA	NA
PIK3CD-AS2	2.14475	0.32812	1.01439	0.323467	0.746342	NA
CLSTN1	2857.04	0.0171508	0.054244	0.316179	0.751867	0.965164
MZT1P1	0.849919	0.667614	1.86594	0.357789	0.720501	NA
ENSG00000280113	0.599239	2.61987	1.97203	1.32852	0.184007	NA
CTNNBIP1	277.046	-0.000253465	0.114903	-0.0022059	0.99824	0.999969
ENSG00000223989	0	NA	NA	NA	NA	NA
ENSG00000285701	4.29286	-0.329816	0.684021	-0.482172	0.629684	NA
ENSG00000228150	4.17233	0.437965	0.67779	0.646166	0.518172	NA
LZIC	427.994	-0.0358823	0.0901375	-0.398084	0.690568	0.953788
NMNAT1	137.242	-0.116446	0.126258	-0.92228	0.356383	0.829428
RN7SKP269	2.30026	-0.131687	1.01577	-0.129643	0.896849	NA
TMEM274P	6.45482	-0.153596	0.574411	-0.267398	0.789163	NA
MIR5697	0.371418	1.91911	2.29909	0.834726	0.403872	NA
ENSG00000241326	0	NA	NA	NA	NA	NA
RBP7	1.47067	1.49513	1.31318	1.13856	0.254888	NA
UBE4B	1224.21	0.0238729	0.0652959	0.365611	0.714655	0.959893
RPL21P21	1.03268	-0.121336	1.44823	-0.0837822	0.93323	NA
PGAM1P11	1.53011	-0.720027	1.32046	-0.545286	0.585557	NA
RNU6-828P	0.657694	-1.9065	1.83971	-1.03631	0.30006	NA
KIF1B	1589.66	-0.00938266	0.0591314	-0.158675	0.873925	0.983739
ENSG00000264881	0.153803	-0.882012	3.53381	-0.249592	0.802903	NA
RNU6-37P	0.574031	1.31626	2.38593	0.551677	0.58117	NA
RN7SL731P	0	NA	NA	NA	NA	NA
ENSG00000284735	5.00677	0.0954614	0.638635	0.149477	0.881177	NA
ENSG00000284642	3.31353	-0.305228	0.800673	-0.381214	0.703044	NA
PGD	2221.24	-0.121388	0.0617091	-1.96711	0.0491706	0.405191
ENSG00000271989	0.479575	1.1777	2.1894	0.537909	0.59064	NA
CENPS-CORT	11.6981	0.187159	0.520334	0.35969	0.719079	0.96148
CENPS	11.9874	0.262421	0.43423	0.604337	0.54562	0.906046
CORT	2.64645	-0.169851	0.877342	-0.193597	0.846491	NA
DFFA	713.404	-0.0561824	0.0695813	-0.807435	0.419416	0.860903
ENSG00000203469	0	NA	NA	NA	NA	NA
PEX14	209.224	-0.115324	0.10923	-1.05578	0.291067	0.786734
ENSG00000307253	1.64152	-0.797094	1.08758	-0.732909	0.463614	NA
ENSG00000287727	6.41572	-0.094728	0.5676	-0.166892	0.867455	NA
RN7SL614P	0.802451	-1.16321	2.22695	-0.522335	0.601437	NA
CASZ1	1.72318	-1.39503	1.21154	-1.15145	0.249547	NA
ENSG00000272078	0.509664	1.25768	2.1662	0.580593	0.561515	NA
ENSG00000298629	0	NA	NA	NA	NA	NA
ENSG00000308013	0	NA	NA	NA	NA	NA
ENSG00000307983	0	NA	NA	NA	NA	NA
ENSG00000307999	0	NA	NA	NA	NA	NA
HSPE1P24	0	NA	NA	NA	NA	NA
ENSG00000308257	0	NA	NA	NA	NA	NA
C1orf127	0	NA	NA	NA	NA	NA
CFL1P6	0	NA	NA	NA	NA	NA
TARDBP	1637.71	-0.147881	0.0633084	-2.33588	0.0194974	0.240611
MASP2	42.1369	0.295575	0.255523	1.15674	0.247377	0.754792
SRM	743.129	0.00956436	0.0681249	0.140394	0.888348	0.988056
EXOSC10-AS1	23.1855	0.0336988	0.308871	0.109103	0.913121	0.991268
EXOSC10	665.005	0.0652638	0.0804499	0.811236	0.41723	0.860793
MTOR	1221.85	-0.0625	0.0561052	-1.11398	0.265289	0.768233
MTOR-AS1	2.92354	-0.552564	0.861148	-0.641659	0.521094	NA
RNU6-537P	0.543418	-0.120468	2.19667	-0.054841	0.956265	NA
ANGPTL7	6.67672	-0.0389623	0.547778	-0.0711279	0.943296	NA
RNU6-291P	0.443985	1.07715	2.22203	0.48476	0.627847	NA
RPL39P6	1.22321	-0.0974244	1.39278	-0.0699494	0.944234	NA
ENSG00000309051	0.36471	-2.0945	2.60802	-0.8031	0.421917	NA
UBIAD1	181.45	0.0245171	0.111183	0.220512	0.825473	0.976199
UBE2V2P3	0.629492	-1.8774	1.85279	-1.01328	0.310926	NA
ENSG00000284646	0.102002	0.560661	3.53381	0.158656	0.87394	NA
ENSG00000302153	0	NA	NA	NA	NA	NA
ENSG00000302176	0	NA	NA	NA	NA	NA
MTCYBP45	0	NA	NA	NA	NA	NA
ENSG00000299102	0	NA	NA	NA	NA	NA
DISP3	1.14172	-1.1949	1.59371	-0.74976	0.453399	NA
ENSG00000285833	0	NA	NA	NA	NA	NA
ENSG00000303300	0	NA	NA	NA	NA	NA
LINC01647	0	NA	NA	NA	NA	NA
ENSG00000284708	0.710291	0.436128	1.87743	0.232301	0.816304	NA
FBXO2	36.6179	-0.147308	0.253073	-0.582079	0.560514	0.911879
FBXO44	158.419	0.190302	0.118752	1.60253	0.109039	0.573358
MAD2L2	311.673	0.0198744	0.109487	0.181522	0.855958	0.980895
FBXO6	27.2502	-0.164789	0.300093	-0.549125	0.58292	0.918392
DRAXIN	163.209	1.39442	0.239842	5.81392	6.10273e-09	1.04082e-06
ENSG00000301523	0	NA	NA	NA	NA	NA
ENSG00000305789	3.66176	-0.395017	0.789947	-0.500054	0.617037	NA
AGTRAP	186.552	-0.115036	0.11397	-1.00935	0.312808	0.804084
C1orf167	0	NA	NA	NA	NA	NA
C1orf167-AS1	0	NA	NA	NA	NA	NA
MTHFR	175.943	-0.128708	0.114005	-1.12897	0.258911	0.764
CLCN6	206.564	0.0676694	0.119776	0.564966	0.572097	0.915051
ENSG00000276470	0.871271	1.27896	1.97594	0.647265	0.517461	NA
ENSG00000278852	0.368709	-0.867496	2.35641	-0.368143	0.712766	NA
NPPA	1.21702	1.83001	1.47875	1.23754	0.215888	NA
ENSG00000275915	0	NA	NA	NA	NA	NA
NPPB	0.113776	0.560661	3.53381	0.158656	0.87394	NA
SBF1P2	0	NA	NA	NA	NA	NA
ENSG00000285646	20.7123	-0.877677	0.334914	-2.62061	0.00877732	0.139072
RNU5E-1	0	NA	NA	NA	NA	NA
RNU5E-4P	7.66829	-0.944968	0.53311	-1.77256	0.0763021	0.495376
KIAA2013	838.038	0.00527869	0.0882853	0.0597913	0.952322	0.995711
PLOD1	4141.67	0.062636	0.0765681	0.818043	0.413332	0.860625
ENSG00000287384	2.20894	-0.00362957	0.955748	-0.00379762	0.99697	NA
MFN2	1200.81	-0.0317342	0.0657689	-0.482511	0.629443	0.937389
ENSG00000270914	0	NA	NA	NA	NA	NA
MIIP	103.392	-0.164967	0.149455	-1.10379	0.269684	0.773
MIR6729	0.12005	0.560661	3.53381	0.158656	0.87394	NA
RN7SL649P	0.233826	1.31326	3.03607	0.432552	0.66534	NA
TNFRSF8	0.574314	-2.68955	2.03402	-1.32228	0.186073	NA
RNU6-777P	0	NA	NA	NA	NA	NA
RPL23AP89	0	NA	NA	NA	NA	NA
ENSG00000285604	0	NA	NA	NA	NA	NA
ENSG00000294285	0	NA	NA	NA	NA	NA
ENSG00000301863	0.341329	1.82642	3.15503	0.57889	0.562663	NA
MIR7846	0	NA	NA	NA	NA	NA
TNFRSF1B	163.882	-0.203507	0.166031	-1.22572	0.220304	0.732369
ENSG00000296888	1.14173	0.419734	1.33549	0.314292	0.7533	NA
MIR4632	0.12005	0.560661	3.53381	0.158656	0.87394	NA
ENSG00000297053	0.12005	0.560661	3.53381	0.158656	0.87394	NA
RPL10P17	0	NA	NA	NA	NA	NA
SNORA70	50.2863	-0.188899	0.23129	-0.816721	0.414088	0.860625
VPS13D	1139.8	-0.0138811	0.0568599	-0.244128	0.807132	0.972635
ENSG00000295309	1.07326	-0.389767	1.36674	-0.285181	0.775506	NA
SNORA59A	2.29735	0.562978	1.02644	0.548477	0.583364	NA
LINC02766	0.98098	1.42331	1.61176	0.883076	0.377195	NA
ENSG00000309694	0	NA	NA	NA	NA	NA
DHRS3	768.391	0.0504393	0.124077	0.406516	0.684364	0.952269
RNU6ATAC18P	2.69206	0.124692	0.897401	0.138948	0.889491	NA
MIR6730	1.97204	0.23691	0.999126	0.237117	0.812566	NA
ENSG00000305650	15.9784	0.02827	0.350679	0.0806152	0.935748	0.994924
ENSG00000288927	23.5068	0.258702	0.293436	0.881631	0.377976	0.84065
AADACL4	0	NA	NA	NA	NA	NA
ENSG00000226166	0	NA	NA	NA	NA	NA
AADACL3	0	NA	NA	NA	NA	NA
CFAP107	0	NA	NA	NA	NA	NA
PRAMEF12	0	NA	NA	NA	NA	NA
PRAMEF1	0	NA	NA	NA	NA	NA
LINC01784	0	NA	NA	NA	NA	NA
PRAMEF11	0	NA	NA	NA	NA	NA
PRAMEF30P	0	NA	NA	NA	NA	NA
HNRNPCL1	0.153803	-0.882012	3.53381	-0.249592	0.802903	NA
PRAMEF2	0	NA	NA	NA	NA	NA
PRAMEF4	0	NA	NA	NA	NA	NA
ENSG00000296105	0	NA	NA	NA	NA	NA
PRAMEF10	0	NA	NA	NA	NA	NA
PRAMEF7	0	NA	NA	NA	NA	NA
RNU6-1072P	0	NA	NA	NA	NA	NA
PRAMEF29P	0	NA	NA	NA	NA	NA
PRAMEF6	0	NA	NA	NA	NA	NA
PRAMEF28P	0	NA	NA	NA	NA	NA
PRAMEF27	0	NA	NA	NA	NA	NA
HNRNPCL3	0	NA	NA	NA	NA	NA
PRAMEF25	0	NA	NA	NA	NA	NA
PRAMEF34P	0	NA	NA	NA	NA	NA
PRAMEF35P	0	NA	NA	NA	NA	NA
HNRNPCL2	0	NA	NA	NA	NA	NA
PRAMEF36P	0	NA	NA	NA	NA	NA
ENSG00000297821	0	NA	NA	NA	NA	NA
ENSG00000233336	0	NA	NA	NA	NA	NA
PRAMEF26	0	NA	NA	NA	NA	NA
HNRNPCL4	0	NA	NA	NA	NA	NA
PRAMEF9	0	NA	NA	NA	NA	NA
PRAMEF13	0	NA	NA	NA	NA	NA
PRAMEF18	0	NA	NA	NA	NA	NA
ENSG00000295394	0	NA	NA	NA	NA	NA
PRAMEF31P	0	NA	NA	NA	NA	NA
PRAMEF5	0	NA	NA	NA	NA	NA
PRAMEF32P	0	NA	NA	NA	NA	NA
RNU6-771P	0	NA	NA	NA	NA	NA
PRAMEF8	0	NA	NA	NA	NA	NA
PRAMEF33	0	NA	NA	NA	NA	NA
PRAMEF15	0	NA	NA	NA	NA	NA
ENSG00000228229	0	NA	NA	NA	NA	NA
PRAMEF14	0	NA	NA	NA	NA	NA
PRAMEF19	0	NA	NA	NA	NA	NA
PRAMEF17	0	NA	NA	NA	NA	NA
PRAMEF20	0	NA	NA	NA	NA	NA
ENSG00000307992	0	NA	NA	NA	NA	NA
ENSG00000295011	0	NA	NA	NA	NA	NA
LRRC38	0	NA	NA	NA	NA	NA
ENSG00000301663	0	NA	NA	NA	NA	NA
ENSG00000259961	0	NA	NA	NA	NA	NA
BRWD1P1	0	NA	NA	NA	NA	NA
PDPN	34.8485	0.588318	0.285837	2.05823	0.0395682	0.366
RNA5SP41	0	NA	NA	NA	NA	NA
ENSG00000237445	0	NA	NA	NA	NA	NA
ENSG00000295237	0	NA	NA	NA	NA	NA
ENSG00000253085	0	NA	NA	NA	NA	NA
PRDM2	662.506	0.0546615	0.0753796	0.725149	0.468361	0.880653
ENSG00000289380	5.07496	-0.830963	0.703558	-1.18109	0.237569	NA
ENSG00000304226	0.102002	0.560661	3.53381	0.158656	0.87394	NA
KAZN	124.336	0.260937	0.145531	1.793	0.0729725	0.488597
RNU6-1265P	0	NA	NA	NA	NA	NA
ENSG00000231606	0	NA	NA	NA	NA	NA
KAZN-AS1	0	NA	NA	NA	NA	NA
ENSG00000302124	0	NA	NA	NA	NA	NA
TBCAP2	0.102002	0.560661	3.53381	0.158656	0.87394	NA
ENSG00000287756	0.266707	-1.58873	2.89758	-0.548297	0.583488	NA
ENSG00000294214	0	NA	NA	NA	NA	NA
ENSG00000294586	0.216433	-0.160671	3.11718	-0.0515438	0.958892	NA
ENSG00000293964	0.348499	-0.786697	2.71244	-0.290033	0.771791	NA
TMEM51-AS1	1.92495	0.200209	1.05724	0.189368	0.849804	NA
ENSG00000310342	0	NA	NA	NA	NA	NA
TMEM51	138.081	-0.143178	0.149052	-0.960587	0.33676	0.819645
TMEM51-AS2	3.09051	-0.386422	0.986425	-0.39174	0.69525	NA
MFFP1	1.21304	1.85322	1.47955	1.25256	0.210366	NA
ZBTB2P1	0.353371	1.8646	2.32413	0.802279	0.422391	NA
FHAD1	0.981743	0.94702	1.6308	0.580707	0.561438	NA
EFHD2-AS1	2.50569	-0.809053	0.94516	-0.855996	0.392	NA
FHAD1-AS1	0.479689	-0.243646	2.24576	-0.108491	0.913606	NA
ENSG00000236045	0	NA	NA	NA	NA	NA
EFHD2	904.771	-0.217569	0.119842	-1.81547	0.0694524	0.478105
CTRC	1.26016	2.00412	1.43323	1.39832	0.162017	NA
CELA2A	0	NA	NA	NA	NA	NA
CELA2B	0.705192	-0.187484	1.69426	-0.110658	0.911888	NA
CASP9	87.0337	0.0371541	0.158178	0.234887	0.814296	0.974148
DNAJC16	496.547	0.0619141	0.0757553	0.817291	0.413762	0.860625
SCARNA21B	0.970757	-0.768969	1.51523	-0.507494	0.611808	NA
ENSG00000272510	1.19343	-0.482461	1.30489	-0.369733	0.711581	NA
AGMAT	13.5287	0.0661522	0.399394	0.165631	0.868447	0.982787
ENSG00000237301	1.25703	0.462887	1.25933	0.367565	0.713198	NA
CHCHD2P6	0.692122	-1.14064	1.83457	-0.621747	0.534108	NA
RNU7-179P	0	NA	NA	NA	NA	NA
ENSG00000294489	0.697409	-0.96426	1.82421	-0.528591	0.597089	NA
CD24P1	0	NA	NA	NA	NA	NA
DDI2	367.203	-0.0583501	0.0951732	-0.613094	0.539814	0.904124
RSC1A1	1.03152	0.579886	1.38759	0.417908	0.676015	NA
ENSG00000271742	0	NA	NA	NA	NA	NA
PLEKHM2	907.635	-0.146522	0.0853885	-1.71595	0.0861718	0.52174
ENSG00000237938	6.17758	0.177273	0.581071	0.30508	0.760305	NA
SLC25A34	11.812	-0.272213	0.423717	-0.642441	0.520587	0.895428
SLC25A34-AS1	0.655668	0.518645	1.89016	0.274392	0.783783	NA
TMEM82	0.763484	0.732055	1.80149	0.406361	0.684478	NA
ENSG00000297277	2.46782	-1.30018	0.956906	-1.35873	0.174232	NA
FBLIM1	1560.5	-0.195089	0.0909328	-2.14542	0.0319192	0.322004
SPEN-AS1	40.0927	-0.105446	0.230697	-0.457076	0.647616	0.940336
RPL12P14	0.267579	-0.160671	2.9059	-0.0552913	0.955906	NA
UQCRHL	49.8056	-0.0815313	0.227599	-0.358224	0.720176	0.961501
ENSG00000178715	0.717452	1.83691	1.79379	1.02404	0.305815	NA
SPEN	1635.16	0.0343772	0.0502194	0.68454	0.493634	0.887032
ENSG00000270620	1.05063	0.991658	1.49756	0.662185	0.507853	NA
ZBTB17	314.006	-0.11062	0.11453	-0.965863	0.334113	0.818768
ENSG00000234607	3.94444	-0.21898	0.734288	-0.298221	0.765535	NA
ENSG00000231353	0	NA	NA	NA	NA	NA
ENSG00000275503	0	NA	NA	NA	NA	NA
TBC1D3P6	0	NA	NA	NA	NA	NA
SRARP	0.252023	-0.160671	2.96346	-0.0542172	0.956762	NA
ENSG00000233078	0	NA	NA	NA	NA	NA
HSPB7	2.13799	0.724852	1.06851	0.678377	0.497533	NA
CLCNKA	0.835719	-0.520048	1.5974	-0.325559	0.744758	NA
ENSG00000307216	0.633378	0.436281	1.9006	0.22955	0.818442	NA
FAM131C2P	0	NA	NA	NA	NA	NA
CLCNKB	2.9649	-0.233164	0.859159	-0.271387	0.786094	NA
FAM131C	9.17042	0.899841	0.485033	1.85522	0.0635652	0.458439
EPHA2	2128.46	-0.0297786	0.0769359	-0.387057	0.698714	0.95582
EPHA2-AS1	22.1254	-0.184346	0.314465	-0.58622	0.557728	0.910877
ENSG00000297531	0.502059	-0.156066	2.03633	-0.0766405	0.93891	NA
ARHGEF19	0	NA	NA	NA	NA	NA
ENSG00000291077	0	NA	NA	NA	NA	NA
ANO7L1	0	NA	NA	NA	NA	NA
ENSG00000288398	0	NA	NA	NA	NA	NA
CPLANE2	0	NA	NA	NA	NA	NA
ENSG00000293791	0	NA	NA	NA	NA	NA
MT1XP1	0	NA	NA	NA	NA	NA
FBXO42	0.113776	0.560661	3.53381	0.158656	0.87394	NA
SZRD1	122.182	-0.0762896	0.162617	-0.469137	0.638971	0.938289
RPL22P3	0	NA	NA	NA	NA	NA
SPATA21	0.529342	-0.624373	2.15253	-0.290065	0.771767	NA
NECAP2	0.342637	-0.847491	2.72774	-0.310693	0.756034	NA
CROCCP3	14.3255	0.278473	0.383894	0.725389	0.468213	0.880653
LINC01772	0	NA	NA	NA	NA	NA
ENSG00000306228	0.377686	-0.903518	2.34613	-0.38511	0.700156	NA
RNU1-1	17.6015	-0.562757	0.432323	-1.30171	0.193017	0.702889
ENSG00000224174	0	NA	NA	NA	NA	NA
LINC01783	1.13902	0.440679	1.33631	0.329771	0.741573	NA
RNU1-6P	0	NA	NA	NA	NA	NA
ENSG00000298308	0	NA	NA	NA	NA	NA
PDE4DIPP8	0.275684	-1.63078	2.87171	-0.56788	0.570116	NA
NBPF1	31.6018	-0.0676842	0.254323	-0.266135	0.790135	0.971731
ENSG00000271732	0.243046	-0.160671	2.99911	-0.0535729	0.957275	NA
ENSG00000291072	11.2709	-0.121514	0.426703	-0.284773	0.775818	0.968561
CROCCP2	0.474163	-1.39884	2.18599	-0.639911	0.522231	NA
ENSG00000283773	0	NA	NA	NA	NA	NA
ENSG00000293920	0	NA	NA	NA	NA	NA
ENSG00000293901	0	NA	NA	NA	NA	NA
MST1P2	1.07951	-0.188803	1.52239	-0.124018	0.901301	NA
ENSG00000282143	0	NA	NA	NA	NA	NA
RNU1-3	1.62539	-1.287	1.25609	-1.0246	0.30555	NA
ENSG00000280114	0	NA	NA	NA	NA	NA
ENSG00000290849	1.20113	0.480572	1.26376	0.380271	0.703744	NA
EIF1AXP1	0.12005	0.560661	3.53381	0.158656	0.87394	NA
ENSG00000296694	0	NA	NA	NA	NA	NA
ESPNP	0	NA	NA	NA	NA	NA
ENSG00000279151	0	NA	NA	NA	NA	NA
ENSG00000293526	0	NA	NA	NA	NA	NA
ENSG00000282740	0	NA	NA	NA	NA	NA
CROCC	112.145	-0.203652	0.142495	-1.42918	0.152952	0.650325
ENSG00000290850	0	NA	NA	NA	NA	NA
RNU1-4	0.137592	0.560661	3.53381	0.158656	0.87394	NA
CROCCP4	3.9481	-1.30534	0.77098	-1.69309	0.090438	NA
ENSG00000290851	0.105453	-0.882012	3.53381	-0.249592	0.802903	NA
MST1L	0	NA	NA	NA	NA	NA
ENSG00000223643	0	NA	NA	NA	NA	NA
PDE4DIPP9	0	NA	NA	NA	NA	NA
MIR3675	0	NA	NA	NA	NA	NA
ENSG00000302843	0	NA	NA	NA	NA	NA
LINC03126	1.51175	0.126283	1.19937	0.105291	0.916145	NA
RNU1-5P	0	NA	NA	NA	NA	NA
ENSG00000238142	0.435008	1.07682	2.23407	0.481998	0.629807	NA
ENSG00000235241	0	NA	NA	NA	NA	NA
RNU1-2	2.97249	-0.654839	0.809521	-0.808922	0.41856	NA
ENSG00000272426	0	NA	NA	NA	NA	NA
ENSG00000290122	1.43893	0.90513	1.21536	0.744739	0.45643	NA
MFAP2	489.666	-0.137837	0.0752582	-1.83152	0.0670234	0.470749
ENSG00000286898	0.353875	1.87066	2.64487	0.707279	0.479393	NA
ENSG00000226526	0	NA	NA	NA	NA	NA
ATP13A2	313.682	0.0458512	0.107961	0.4247	0.671055	0.94753
ENSG00000288636	0	NA	NA	NA	NA	NA
SDHB	349.671	-0.0829922	0.102646	-0.80853	0.418785	0.860793
PADI2	0	NA	NA	NA	NA	NA
LINC02783	0	NA	NA	NA	NA	NA
ENSG00000282843	0	NA	NA	NA	NA	NA
PADI1	0	NA	NA	NA	NA	NA
PADI3	0	NA	NA	NA	NA	NA
MIR3972	0	NA	NA	NA	NA	NA
PADI4	0	NA	NA	NA	NA	NA
PADI6	0	NA	NA	NA	NA	NA
RCC2-AS1	0	NA	NA	NA	NA	NA
RCC2	0.161254	-0.882012	3.53381	-0.249592	0.802903	NA
ENSG00000308620	0	NA	NA	NA	NA	NA
ENSG00000290096	0.153803	-0.882012	3.53381	-0.249592	0.802903	NA
ENSG00000307703	0	NA	NA	NA	NA	NA
ENSG00000306620	0.105453	-0.882012	3.53381	-0.249592	0.802903	NA
ARHGEF10L	279.16	-0.118725	0.0995585	-1.19252	0.233058	0.745628
ENSG00000302710	0	NA	NA	NA	NA	NA
LINC02810	0	NA	NA	NA	NA	NA
ACTL8	0.429487	-2.27043	2.21521	-1.02493	0.305398	NA
ENSG00000296176	0	NA	NA	NA	NA	NA
ENSG00000296161	0	NA	NA	NA	NA	NA
ENSG00000284653	0	NA	NA	NA	NA	NA
ENSG00000302372	0	NA	NA	NA	NA	NA
LINC01654	0	NA	NA	NA	NA	NA
IGSF21	0	NA	NA	NA	NA	NA
ENSG00000280222	0	NA	NA	NA	NA	NA
ENSG00000293810	0	NA	NA	NA	NA	NA
IGSF21-AS1	0	NA	NA	NA	NA	NA
ENSG00000293766	0	NA	NA	NA	NA	NA
ENSG00000225387	0	NA	NA	NA	NA	NA
ENSG00000294535	0	NA	NA	NA	NA	NA
KLHDC7A	0.102002	0.560661	3.53381	0.158656	0.87394	NA
DYNLL1P3	0	NA	NA	NA	NA	NA
ENSG00000225478	0	NA	NA	NA	NA	NA
ENSG00000300147	0	NA	NA	NA	NA	NA
PAX7	0	NA	NA	NA	NA	NA
ENSG00000308985	0	NA	NA	NA	NA	NA
TAS1R2	0	NA	NA	NA	NA	NA
ALDH4A1	117.131	-0.148143	0.152007	-0.974581	0.329768	0.814578
MIR4695	0	NA	NA	NA	NA	NA
MIR1290	0	NA	NA	NA	NA	NA
ENSG00000310349	0.873477	1.17614	1.61664	0.727519	0.466908	NA
IFFO2	592.438	0.100431	0.077337	1.29862	0.194074	0.703562
ENSG00000295712	2.99207	1.21771	0.860246	1.41554	0.156911	NA
ENSG00000308389	0	NA	NA	NA	NA	NA
ENSG00000307102	0	NA	NA	NA	NA	NA
ENSG00000272084	7.9284	-0.042573	0.509401	-0.0835747	0.933395	0.994524
UBR4	3453.28	-0.00260888	0.0477094	-0.0546827	0.956391	0.996318
EMC1-AS1	7.40707	0.169925	0.547275	0.310493	0.756186	0.965732
EMC1	1597.92	0.0115116	0.0703341	0.163669	0.869991	0.982787
ENSG00000309633	9.38698	0.690021	0.466444	1.47932	0.139055	0.629876
MRTO4	323.662	-0.148906	0.122625	-1.21433	0.224623	0.738253
ENSG00000286064	5.88334	-0.0429804	0.605952	-0.0709304	0.943453	NA
AKR7L	5.4298	1.28661	0.652039	1.97321	0.0484718	NA
AKR7A3	9.60386	0.192585	0.464817	0.414325	0.678636	0.950629
ENSG00000270728	16.7819	0.370969	0.364134	1.01877	0.308311	0.801427
ENSG00000308073	35.0575	0.161265	0.247823	0.650729	0.515222	0.893369
AKR7A2	441.801	-0.155765	0.0763466	-2.04024	0.0413267	0.372719
RNU6-1099P	2.71673	-0.977721	0.864703	-1.1307	0.25818	NA
SLC66A1	146.142	-0.0639212	0.127648	-0.500761	0.616539	0.933019
CAPZB	2717.18	-0.186444	0.0634241	-2.93964	0.0032859	0.0704472
ENSG00000306364	6.97204	-0.239648	0.5452	-0.439559	0.660256	NA
RN7SL277P	0.432211	1.04065	2.23391	0.465841	0.641329	NA
ENSG00000306329	4.08309	0.0694905	0.713047	0.0974557	0.922365	NA
MICOS10	64.0321	-0.378105	0.186564	-2.02668	0.0426953	0.379369
ENSG00000306287	0.23448	-0.160671	3.03497	-0.05294	0.95778	NA
RNU4-28P	0	NA	NA	NA	NA	NA
MICOS10-DT	0.153803	-0.882012	3.53381	-0.249592	0.802903	NA
NBL1	633.453	-0.28874	0.0717217	-4.02584	5.67716e-05	0.00279785
MICOS10-NBL1	0.363095	0.615372	2.3835	0.25818	0.796268	NA
ENSG00000226396	2.95042	0.0993514	0.84961	0.116938	0.906909	NA
ENSG00000306350	2.97648	-0.0326526	0.830168	-0.0393325	0.968625	NA
HTR6	1.94686	0.039826	1.00362	0.0396822	0.968347	NA
TMCO4	150.839	-0.10015	0.128405	-0.779951	0.43542	0.866363
RNF186	0	NA	NA	NA	NA	NA
RNF186-AS1	0	NA	NA	NA	NA	NA
OTUD3	266.845	0.146508	0.0951557	1.53967	0.123641	0.603844
ENSG00000308515	5.13136	-0.320984	0.657327	-0.488317	0.625325	NA
PLA2G2E	0	NA	NA	NA	NA	NA
RN7SL304P	0	NA	NA	NA	NA	NA
PLA2G2A	0	NA	NA	NA	NA	NA
ENSG00000297402	0	NA	NA	NA	NA	NA
PLA2G5	0.377187	1.93883	2.60196	0.745142	0.456186	NA
PLA2G2D	0	NA	NA	NA	NA	NA
ENSG00000307383	0	NA	NA	NA	NA	NA
PLA2G2F	0	NA	NA	NA	NA	NA
ENSG00000227066	0	NA	NA	NA	NA	NA
PLA2G2C	0	NA	NA	NA	NA	NA
UBXN10	0.12005	0.560661	3.53381	0.158656	0.87394	NA
LINC01757	0	NA	NA	NA	NA	NA
ENSG00000284710	0	NA	NA	NA	NA	NA
VWA5B1	0.113776	0.560661	3.53381	0.158656	0.87394	NA
ENSG00000226664	0	NA	NA	NA	NA	NA
ENSG00000304627	0	NA	NA	NA	NA	NA
LINC01141	1.33746	1.27784	1.33891	0.954383	0.33989	NA
ENSG00000226487	0	NA	NA	NA	NA	NA
ENSG00000284641	0	NA	NA	NA	NA	NA
ENSG00000284743	0.268233	-1.63098	2.89653	-0.563082	0.573379	NA
ENSG00000296909	0.798202	-0.147237	1.66603	-0.0883757	0.929578	NA
CAMK2N1	749.816	0.00224432	0.0899508	0.0249505	0.980094	0.999686
ENSG00000289402	2.39929	1.73645	1.04907	1.65524	0.0978765	NA
MUL1	290.887	-0.0827281	0.114659	-0.721515	0.470593	0.881215
RPS4XP4	0	NA	NA	NA	NA	NA
FAM43B	29.3095	0.260517	0.265374	0.981698	0.326248	0.813082
CDA	8.97122	0.409671	0.469655	0.872281	0.383055	0.843937
PINK1	254.073	0.0804715	0.10121	0.795092	0.42656	0.864024
MIR6084	0	NA	NA	NA	NA	NA
PINK1-AS	92.7734	-0.0092322	0.15305	-0.0603213	0.9519	0.995711
DDOST	2220.75	0.0352239	0.0512937	0.686711	0.492265	0.886988
ENSG00000296887	0.11443	-0.882012	3.53381	-0.249592	0.802903	NA
KIF17	9.68151	0.446205	0.479135	0.931274	0.351712	0.826706
ENSG00000235432	0	NA	NA	NA	NA	NA
SH2D5	24.3659	-0.0891444	0.300668	-0.296487	0.766858	0.967412
ENSG00000298940	0.767385	3.01108	1.83059	1.64487	0.0999971	NA
ENSG00000233069	0.46886	-2.38194	2.45052	-0.972016	0.331043	NA
HP1BP3	3153.8	-0.00394602	0.0521925	-0.0756051	0.939733	0.995091
EIF4G3	1955.03	0.00798507	0.0623245	0.128121	0.898053	0.989452
RNU7-200P	0	NA	NA	NA	NA	NA
MIR1256	1.00492	-1.72899	1.70598	-1.01349	0.310827	NA
RPS15AP6	1.56801	0.543553	1.12437	0.483429	0.628791	NA
ENSG00000236073	1.21516	0.419771	1.25997	0.33316	0.739013	NA
HSPE1P27	2.91239	-0.601594	0.839605	-0.716521	0.47367	NA
ENSG00000287192	1.35391	0.137428	1.17816	0.116646	0.90714	NA
ECE1	3524.43	-0.1506	0.0892007	-1.68833	0.0913478	0.535452
ENSG00000236936	4.65754	0.248203	0.659231	0.376503	0.706543	NA
ECE1-AS1	8.41489	-0.210817	0.493252	-0.427402	0.669087	0.947135
ENSG00000296859	1.00887	-0.156109	1.45102	-0.107586	0.914324	NA
PPP1R11P1	0	NA	NA	NA	NA	NA
PDE4DIPP10	0	NA	NA	NA	NA	NA
ENSG00000236009	0	NA	NA	NA	NA	NA
NBPF2P	2.98354	0.872471	0.959218	0.909566	0.363052	NA
HS6ST1P1	3.44888	-0.504523	0.767052	-0.657742	0.510704	NA
CROCCP5	0	NA	NA	NA	NA	NA
ENSG00000295832	0	NA	NA	NA	NA	NA
NBPF3	156.086	-0.190082	0.122652	-1.54977	0.121197	0.597335
PFN1P10	0.702991	-1.99259	2.01099	-0.99085	0.321759	NA
ALPL	9.64554	0.73404	0.502936	1.45951	0.144425	0.637593
ENSG00000298372	0	NA	NA	NA	NA	NA
ENSG00000289715	0	NA	NA	NA	NA	NA
ENSG00000305564	0.11443	-0.882012	3.53381	-0.249592	0.802903	NA
LINC02596	0	NA	NA	NA	NA	NA
RAP1GAP	2.45239	0.469412	0.883071	0.531568	0.595025	NA
USP48	1083.35	0.0191299	0.072853	0.262582	0.792873	0.971942
ENSG00000231978	1.74521	0.32674	1.14357	0.285718	0.775094	NA
LDLRAD2	6.16182	0.304536	0.572424	0.532012	0.594718	NA
HSPG2	6460.25	0.154522	0.0486766	3.17447	0.00150111	0.0395579
ENSG00000305448	1.3287	1.17898	1.33207	0.885073	0.376118	NA
RPL21P29	0.966617	0.478707	1.5456	0.309723	0.756771	NA
ENSG00000293453	0	NA	NA	NA	NA	NA
ENSG00000283234	0	NA	NA	NA	NA	NA
CELA3B	0	NA	NA	NA	NA	NA
ENSG00000285959	0	NA	NA	NA	NA	NA
RN7SL386P	0	NA	NA	NA	NA	NA
RNU6-1022P	0	NA	NA	NA	NA	NA
CELA3A	0.113776	0.560661	3.53381	0.158656	0.87394	NA
RN7SL186P	0	NA	NA	NA	NA	NA
RNU6-776P	0	NA	NA	NA	NA	NA
LINC01635	0.21923	-0.160671	3.1038	-0.0517661	0.958715	NA
LINC00339	9.23291	0.19006	0.496442	0.382844	0.701835	0.956761
ENSG00000289694	0	NA	NA	NA	NA	NA
CDC42-AS1	5.54567	-0.0423089	0.625282	-0.0676636	0.946053	NA
ENSG00000285794	0	NA	NA	NA	NA	NA
CDC42	165.614	0.162511	0.115721	1.40434	0.160219	0.660705
CDC42-IT1	5.57642	0.708519	0.61851	1.14553	0.251991	NA
MPHOSPH6P1	4.02928	-0.015059	0.731408	-0.0205891	0.983573	NA
ENSG00000305135	1.1458	-0.540532	1.30984	-0.412671	0.679848	NA
WNT4	8.86624	-0.313318	0.483022	-0.648663	0.516556	0.894151
ENSG00000305152	1.40921	1.27779	1.27967	0.998536	0.31802	NA
ENSG00000285873	0.105453	-0.882012	3.53381	-0.249592	0.802903	NA
ENSG00000294752	0.219884	-1.53529	3.08871	-0.497063	0.619144	NA
MIR4418	0	NA	NA	NA	NA	NA
ENSG00000294164	0	NA	NA	NA	NA	NA
ENSG00000302675	0	NA	NA	NA	NA	NA
PPIAP34	0	NA	NA	NA	NA	NA
ENSG00000279625	0	NA	NA	NA	NA	NA
ENSG00000299881	0	NA	NA	NA	NA	NA
ZBTB40	473.666	-0.122179	0.0748907	-1.63143	0.1028	0.560892
ENSG00000302246	1.15626	0.930721	1.51807	0.613095	0.539814	NA
ZBTB40-IT1	2.71208	0.378555	0.839936	0.450695	0.65221	NA
EPHA8	0.161254	-0.882012	3.53381	-0.249592	0.802903	NA
MIR6127	0	NA	NA	NA	NA	NA
C1QA	0	NA	NA	NA	NA	NA
ENSG00000289692	0	NA	NA	NA	NA	NA
C1QC	0	NA	NA	NA	NA	NA
ENSG00000308848	0	NA	NA	NA	NA	NA
C1QB	0	NA	NA	NA	NA	NA
EPHB2	2300.74	0.155284	0.0614846	2.52558	0.0115509	0.168264
MIR4684	0.643739	-0.828221	1.90735	-0.434227	0.664124	NA
ENSG00000225952	1.66477	-1.29492	1.17427	-1.10274	0.270138	NA
MIR4253	0.12005	0.560661	3.53381	0.158656	0.87394	NA
LACTBL1	0.11443	-0.882012	3.53381	-0.249592	0.802903	NA
ENSG00000297948	0	NA	NA	NA	NA	NA
TEX46	0.251368	1.31386	2.96899	0.442529	0.658107	NA
KDM1A	2117.34	-0.0269161	0.0525678	-0.512027	0.608632	0.928454
ENSG00000240553	3.36456	-0.282475	0.776943	-0.363572	0.716178	NA
MIR3115	0.56708	-1.53424	1.93345	-0.793527	0.427471	NA
ENSG00000266802	0.969449	0.661054	1.52681	0.432965	0.66504	NA
LUZP1	1259.54	0.0620377	0.0554314	1.11918	0.263063	0.766181
ENSG00000293565	0	NA	NA	NA	NA	NA
ENSG00000229010	2.53082	-0.737434	1.00633	-0.732798	0.463682	NA
RNU6-514P	0.837233	2.11358	1.70819	1.23733	0.215966	NA
RNU6-135P	0.781531	0.747897	1.9838	0.377003	0.706171	NA
ENSG00000289014	9.52012	-0.0451891	0.453261	-0.0996976	0.920584	0.992228
HTR1D	14.9891	-0.341387	0.434589	-0.785539	0.432138	0.865908
ENSG00000304077	0.373033	-0.867499	2.34811	-0.369446	0.711795	NA
RPL29P6	0	NA	NA	NA	NA	NA
ENSG00000302918	0	NA	NA	NA	NA	NA
LINC01355	0.11443	-0.882012	3.53381	-0.249592	0.802903	NA
ENSG00000284726	0	NA	NA	NA	NA	NA
HNRNPR	0.210907	-1.49878	3.52627	-0.425034	0.670812	NA
ZNF436	0	NA	NA	NA	NA	NA
ZNF436-AS1	1.8381	0.631326	1.06169	0.59464	0.552084	NA
ENSG00000271420	0	NA	NA	NA	NA	NA
TCEA3	0	NA	NA	NA	NA	NA
ENSG00000232482	0	NA	NA	NA	NA	NA
ENSG00000295946	0	NA	NA	NA	NA	NA
ASAP3	0	NA	NA	NA	NA	NA
E2F2	0	NA	NA	NA	NA	NA
ENSG00000307540	0	NA	NA	NA	NA	NA
ENSG00000307580	0	NA	NA	NA	NA	NA
ENSG00000235052	0	NA	NA	NA	NA	NA
ID3	0	NA	NA	NA	NA	NA
ENSG00000307609	0	NA	NA	NA	NA	NA
ENSG00000285802	0.153803	-0.882012	3.53381	-0.249592	0.802903	NA
MDS2	0.228206	-0.160671	3.06246	-0.0524647	0.958158	NA
EEF1A1P48	0	NA	NA	NA	NA	NA
ENSG00000304075	0	NA	NA	NA	NA	NA
RPL11	3417.34	-0.0320053	0.0750067	-0.4267	0.669598	0.947135
ELOA-AS1	11.4737	0.147684	0.415489	0.355447	0.722255	0.962071
ELOA	549.219	-0.0542994	0.0739959	-0.733816	0.463061	0.880492
PITHD1	334.006	-0.116887	0.0924958	-1.26371	0.206336	0.71996
ENSG00000289835	3.61379	0.0737004	0.771102	0.095578	0.923856	NA
LYPLA2	354.293	-0.194457	0.0954449	-2.03737	0.0416129	0.374418
GALE	323.983	-0.23434	0.138264	-1.69487	0.0901009	0.532778
HMGCL	197.021	-0.0732436	0.116293	-0.629821	0.528812	0.89866
FUCA1	77.1617	0.241213	0.181557	1.32858	0.183987	0.689147
CNR2	0.113776	0.560661	3.53381	0.158656	0.87394	NA
BTBD6P1	0	NA	NA	NA	NA	NA
ENSG00000232557	0	NA	NA	NA	NA	NA
MIR378F	0	NA	NA	NA	NA	NA
ENSG00000299163	0.105453	-0.882012	3.53381	-0.249592	0.802903	NA
H3P1	0	NA	NA	NA	NA	NA
PNRC2	770.04	-0.101629	0.0736563	-1.37977	0.167658	0.669
SRSF10	1178.7	0.0649262	0.0622245	1.04342	0.296755	0.794121
ENSG00000225315	0.273853	-0.160671	2.88405	-0.0557101	0.955573	NA
RPL36P5	0	NA	NA	NA	NA	NA
MYOM3	6.95225	0.413337	0.586174	0.705144	0.480721	NA
MYOM3-AS1	0.450912	-0.1522	2.2746	-0.0669128	0.946651	NA
IL22RA1	0	NA	NA	NA	NA	NA
IFNLR1	3.63625	0.797167	0.797377	0.999737	0.317438	NA
GRHL3	2.03228	0.93258	1.06315	0.877188	0.380385	NA
LINC02800	0.113776	0.560661	3.53381	0.158656	0.87394	NA
ENSG00000309961	0	NA	NA	NA	NA	NA
GRHL3-AS1	0.153803	-0.882012	3.53381	-0.249592	0.802903	NA
STPG1	76.9671	0.158854	0.170297	0.932806	0.35092	0.826706
ENSG00000307212	0.595739	-0.712364	1.80753	-0.394109	0.693501	NA
NIPAL3	656.51	-0.185105	0.0780739	-2.37089	0.0177454	0.227497
ENSG00000288982	4.21363	0.407451	0.743116	0.548301	0.583485	NA
NCMAP-DT	1.39008	0.947653	1.33784	0.708344	0.478732	NA
RCAN3	389.449	-0.176482	0.080914	-2.18111	0.0291753	0.306684
NCMAP	1.15256	0.694226	1.47093	0.471965	0.636952	NA
ENSG00000227312	0	NA	NA	NA	NA	NA
ENSG00000298126	0	NA	NA	NA	NA	NA
SRRM1	1279.97	0.0725127	0.0619917	1.16972	0.242115	0.750526
ENSG00000307307	6.92122	0.438194	0.554881	0.789707	0.429699	NA
ENSG00000284699	0.227552	1.2917	3.52716	0.366217	0.714203	NA
ENSG00000307325	0.22886	-1.56589	3.52319	-0.444453	0.656715	NA
CLIC4	10853.9	-0.0257419	0.0379956	-0.677497	0.498091	0.887953
RNU6-1208P	1.73242	1.80392	1.3199	1.36671	0.171716	NA
ENSG00000293733	0.102002	0.560661	3.53381	0.158656	0.87394	NA
RUNX3	64.2191	0.319903	0.213966	1.49511	0.134886	0.624787
MIR6731	0	NA	NA	NA	NA	NA
RUNX3-AS1	4.48725	0.799015	0.803329	0.994629	0.319917	NA
ENSG00000261025	0.485937	-1.39908	2.1721	-0.644113	0.519502	NA
MIR4425	0	NA	NA	NA	NA	NA
LINC02793	0	NA	NA	NA	NA	NA
ENSG00000233755	0.153803	-0.882012	3.53381	-0.249592	0.802903	NA
ENSG00000303094	0	NA	NA	NA	NA	NA
ENSG00000306010	0	NA	NA	NA	NA	NA
IFITM3P7	0	NA	NA	NA	NA	NA
ENSG00000307250	0	NA	NA	NA	NA	NA
ENSG00000231953	0	NA	NA	NA	NA	NA
SYF2	286.699	-0.117785	0.0992688	-1.18653	0.235413	0.746576
ENSG00000284657	8.08399	0.228965	0.515582	0.44409	0.656978	0.943311
ENSG00000299599	1.25116	0.414677	1.2582	0.329579	0.741718	NA
RSRP1	394.367	-0.124568	0.0886046	-1.40588	0.159758	0.660705
ENSG00000272432	3.14552	-0.474357	0.821408	-0.577492	0.563607	NA
ENSG00000261349	7.83313	-0.930415	0.508106	-1.83114	0.0670789	0.470749
RHD	12.8946	0.134026	0.431221	0.310807	0.755947	0.965732
ENSG00000309241	2.33103	0.272227	0.962214	0.282917	0.77724	NA
SDHDP6	1.36574	0.460759	1.30257	0.353731	0.723541	NA
ENSG00000259984	10.1594	0.449687	0.454678	0.989023	0.322652	0.810815
TMEM50A	957.404	0.0179982	0.0604332	0.29782	0.76584	0.967412
RHCE	1.63167	1.19119	1.13492	1.04958	0.293911	NA
ENSG00000238084	0.865808	-0.46308	1.59005	-0.291235	0.770871	NA
MACO1	404.793	0.165773	0.108593	1.52655	0.126872	0.609234
LDLRAP1	151.905	0.0569853	0.119513	0.476812	0.633496	0.93809
MAN1C1	37.332	-0.312004	0.244174	-1.27779	0.201323	0.710999
ENSG00000233478	0.373687	-2.12736	2.28268	-0.931958	0.351358	NA
SELENON	2143.05	0.0209464	0.0594296	0.352457	0.724496	0.962128
ENSG00000255054	0	NA	NA	NA	NA	NA
ENSG00000228172	10.0329	0.239671	0.445897	0.537503	0.59092	0.920598
MTFR1L	273.663	0.13019	0.104156	1.24995	0.211317	0.724815
ENSG00000272478	0	NA	NA	NA	NA	NA
AUNIP	48.3423	-0.0462791	0.217819	-0.212466	0.831744	0.977239
ENSG00000236528	3.72902	-0.835222	0.807458	-1.03438	0.300956	NA
PAQR7	132.015	0.00548604	0.133275	0.0411633	0.967166	0.997963
STMN1	3800.65	-0.108722	0.0786128	-1.383	0.166664	0.667627
SNRPFP2	1.27659	-0.748424	1.21814	-0.614397	0.538953	NA
ENSG00000223624	1.33807	1.30871	1.27006	1.03043	0.302809	NA
ENSG00000294297	0.393398	0.537552	2.32299	0.231405	0.817	NA
MIR3917	0	NA	NA	NA	NA	NA
ENSG00000294284	0	NA	NA	NA	NA	NA
PAFAH2	110.64	-0.226788	0.145412	-1.55963	0.118848	0.594001
RNU6-110P	0	NA	NA	NA	NA	NA
ENSG00000310101	0.717838	0.790681	1.69885	0.465422	0.641629	NA
ENSG00000252190	0	NA	NA	NA	NA	NA
ENSG00000252691	0	NA	NA	NA	NA	NA
EXTL1	22.0945	0.488999	0.31799	1.53778	0.124102	0.605045
ENSG00000310112	0.541115	-0.606747	1.96016	-0.309539	0.756912	NA
SLC30A2	1.1785	1.88848	1.41556	1.33408	0.182178	NA
ENSG00000301481	0	NA	NA	NA	NA	NA
ENSG00000301509	0	NA	NA	NA	NA	NA
ENSG00000284309	0.102002	0.560661	3.53381	0.158656	0.87394	NA
TRIM63	0.161254	-0.882012	3.53381	-0.249592	0.802903	NA
ENSG00000309383	0	NA	NA	NA	NA	NA
PDIK1L	117.111	0.0873191	0.146584	0.595692	0.551381	0.90829
ENSG00000309933	1.21582	-0.148665	1.21288	-0.122572	0.902446	NA
FAM110D	5.58965	-0.0871223	0.642746	-0.135547	0.892179	NA
C1orf232	0	NA	NA	NA	NA	NA
ZNF593OS	2.35284	0.354737	0.983378	0.360733	0.718299	NA
ZNF593	0	NA	NA	NA	NA	NA
CNKSR1	1.82451	0.483312	1.03479	0.467064	0.640454	NA
ENSG00000302380	0	NA	NA	NA	NA	NA
CATSPER4	0	NA	NA	NA	NA	NA
ZPLD2P	0	NA	NA	NA	NA	NA
ENSG00000278572	0	NA	NA	NA	NA	NA
ENSG00000306815	0.542391	-2.62718	2.05335	-1.27946	0.200736	NA
CEP85	175.435	0.0772255	0.110758	0.697244	0.48565	0.884107
ENSG00000270733	0.843288	0.275985	1.62463	0.169875	0.865108	NA
ENSG00000301028	2.16871	0.130508	0.959727	0.135984	0.891834	NA
SH3BGRL3	1308.81	-0.0193027	0.0617061	-0.312817	0.75442	0.965732
UBXN11	88.4326	-0.0405961	0.157862	-0.257163	0.797053	0.972428
CD52	0	NA	NA	NA	NA	NA
CRYBG2	0.11443	-0.882012	3.53381	-0.249592	0.802903	NA
ENSG00000225854	0	NA	NA	NA	NA	NA
ZNF683	0	NA	NA	NA	NA	NA
LIN28A	0	NA	NA	NA	NA	NA
DHDDS-AS1	15.0673	-0.291043	0.362625	-0.8026	0.422206	0.861985
DHDDS	374.228	0.0317918	0.084053	0.378234	0.705256	0.957972
RPL17P9	4.23175	-0.508928	0.702862	-0.72408	0.469017	NA
HMGN2	2269.54	-0.0390407	0.0558194	-0.699412	0.484295	0.883781
ENSG00000294798	2.26542	0.0750698	0.94668	0.079298	0.936796	NA
DPPA2P2	0	NA	NA	NA	NA	NA
RPS6KA1	0	NA	NA	NA	NA	NA
MIR1976	0	NA	NA	NA	NA	NA
RN7SL679P	0	NA	NA	NA	NA	NA
RNU7-29P	0	NA	NA	NA	NA	NA
ENSG00000289452	0	NA	NA	NA	NA	NA
ENSG00000299831	0	NA	NA	NA	NA	NA
ENSG00000299868	0	NA	NA	NA	NA	NA
ENSG00000229247	0	NA	NA	NA	NA	NA
ENSG00000238316	0	NA	NA	NA	NA	NA
ENSG00000235069	0	NA	NA	NA	NA	NA
ENSG00000299849	0.12005	0.560661	3.53381	0.158656	0.87394	NA
ENSG00000260063	13.1918	0.0243825	0.405715	0.0600976	0.952078	0.995711
ENSG00000290006	0	NA	NA	NA	NA	NA
ARID1A	1945.11	0.076778	0.0668067	1.14926	0.25045	0.758706
ENSG00000303544	4.83235	0.0908937	0.672512	0.135156	0.892489	NA
PIGV	140.149	-0.0386292	0.125595	-0.30757	0.758409	0.966168
RN7SL165P	0.266707	-1.58873	2.89758	-0.548297	0.583488	NA
ENSG00000287810	0.12005	0.560661	3.53381	0.158656	0.87394	NA
ZDHHC18	270.933	0.0539835	0.100293	0.538256	0.5904	0.920598
ENSG00000304862	2.54457	0.744502	0.914859	0.813789	0.415766	NA
SFN	0.78056	1.19968	1.75048	0.685344	0.493127	NA
ENSG00000309929	0.435107	-0.999587	2.28197	-0.438037	0.661359	NA
GPN2	296.415	0.0447937	0.0916773	0.488602	0.625123	0.936386
ENSG00000226698	0	NA	NA	NA	NA	NA
ENSG00000289554	22.695	-0.265198	0.325706	-0.814225	0.415516	0.860793
GPATCH3	99.8365	-0.0262003	0.177929	-0.147251	0.882934	0.987423
NUDC	816.9	-0.214948	0.0860973	-2.49657	0.01254	0.17856
NR0B2	0.21923	-0.160671	3.1038	-0.0517661	0.958715	NA
KDF1	0.379306	-0.867503	2.33781	-0.371075	0.710582	NA
ENSG00000297103	0	NA	NA	NA	NA	NA
RPL12P13	0	NA	NA	NA	NA	NA
RPL32P6	0	NA	NA	NA	NA	NA
OSTCP2	0	NA	NA	NA	NA	NA
TRNP1	250.192	-0.530533	0.20356	-2.60627	0.0091534	0.142491
TENT5B	42.0427	-0.503177	0.2688	-1.87194	0.0612155	0.450407
ENSG00000299378	0	NA	NA	NA	NA	NA
ENSG00000299392	0	NA	NA	NA	NA	NA
SLC9A1	696.065	-0.105795	0.067923	-1.55757	0.119334	0.594758
ENSG00000298936	0	NA	NA	NA	NA	NA
ENSG00000229985	0	NA	NA	NA	NA	NA
CHCHD3P3	0.354025	0.536939	2.38808	0.224841	0.822103	NA
NPM1P39	5.57016	-0.288751	0.633644	-0.4557	0.648606	NA
SNRPEP7	0	NA	NA	NA	NA	NA
WDTC1-DT	0.291396	-0.16067	2.82667	-0.0568409	0.954672	NA
WDTC1	702.966	0.0557042	0.0656505	0.848496	0.396162	0.851421
ENSG00000243659	2.8446	-1.29249	1.02691	-1.25863	0.208165	NA
TMEM222	263.848	0.126193	0.105587	1.19516	0.232023	0.744741
RNU6-48P	0.949352	-0.0451449	1.6472	-0.027407	0.978135	NA
ACTG1P20	4.4192	0.365278	0.681754	0.535792	0.592102	NA
ENSG00000304055	5.21896	0.354163	0.675066	0.524634	0.599837	NA
SYTL1	7.10224	0.41966	0.519371	0.808017	0.419081	0.860801
MAP3K6	251.093	-0.0378522	0.110356	-0.343002	0.731597	0.963299
FCN3	0.515284	2.38618	2.35205	1.01451	0.310339	NA
CD164L2	0.161254	-0.882012	3.53381	-0.249592	0.802903	NA
ENSG00000231207	0.113776	0.560661	3.53381	0.158656	0.87394	NA
ENSG00000306354	0.102002	0.560661	3.53381	0.158656	0.87394	NA
ENSG00000306368	0	NA	NA	NA	NA	NA
GPR3	40.352	0.237833	0.234946	1.01228	0.311402	0.803736
WASF2	2224.54	2.94478e-05	0.0602453	0.000488799	0.99961	0.999969
ENSG00000241169	2.1282	-0.731523	1.00029	-0.73131	0.46459	NA
ENSG00000301155	0.153803	-0.882012	3.53381	-0.249592	0.802903	NA
ENSG00000237429	0.967157	0.621731	1.39879	0.444477	0.656698	NA
ENSG00000300499	0.677811	1.83986	1.81612	1.01307	0.311026	NA
AHDC1	615.341	-0.00283218	0.0694176	-0.0407991	0.967456	0.997963
ENSG00000300470	7.96587	-0.375879	0.526484	-0.713943	0.475263	0.882656
FGR	0.210907	-1.49878	3.52627	-0.425034	0.670812	NA
ENSG00000301194	0.113776	0.560661	3.53381	0.158656	0.87394	NA
ENSG00000310432	0	NA	NA	NA	NA	NA
ENSG00000235912	0	NA	NA	NA	NA	NA
LINC02574	1.42814	0.80221	1.17371	0.68348	0.494304	NA
IFI6	208.839	0.593856	0.408997	1.45198	0.146506	0.64073
ENSG00000294734	0	NA	NA	NA	NA	NA
ENSG00000225886	2.63231	1.34012	0.987538	1.35703	0.174771	NA
RNU6-949P	0	NA	NA	NA	NA	NA
CHMP1AP1	0	NA	NA	NA	NA	NA
RNU6-424P	0	NA	NA	NA	NA	NA
ENSG00000287244	0.34891	-0.847575	2.71244	-0.312477	0.754678	NA
FAM76A	116.463	0.0122384	0.141103	0.0867336	0.930883	0.993788
ENSG00000231344	1.28068	-1.46862	1.35357	-1.085	0.277922	NA
RPEP3	1.01429	1.62404	1.61408	1.00617	0.314333	NA
STX12	513.304	-0.0525862	0.0778433	-0.675539	0.499334	0.888695
ENSG00000269971	0.615954	1.54143	2.05544	0.749925	0.4533	NA
ENSG00000270031	1.5341	0.506426	1.13978	0.444319	0.656812	NA
RNU6-1245P	0.215779	1.24799	3.11328	0.400859	0.688524	NA
ENSG00000286433	0.917167	-1.47056	1.73918	-0.845553	0.397802	NA
PPP1R8	406.286	0.00195289	0.082214	0.0237537	0.981049	0.999686
SCARNA1	6.4009	-0.13267	0.543002	-0.244326	0.806978	NA
ENSG00000309988	3.65104	0.489153	0.869116	0.562817	0.573559	NA
THEMIS2	66.7061	0.430345	0.189917	2.26596	0.0234536	0.267713
RPA2	240.937	0.0256731	0.102383	0.250756	0.802003	0.972462
SMPDL3B	0	NA	NA	NA	NA	NA
ENSG00000227050	0	NA	NA	NA	NA	NA
XKR8	80.1058	-0.0957012	0.173023	-0.553112	0.580187	0.917548
EYA3	589.247	0.0398151	0.0747912	0.53235	0.594484	0.922477
ENSG00000238231	0.789131	-0.200709	1.58662	-0.126501	0.899335	NA
RN7SL559P	2.33375	0.278471	0.992263	0.280642	0.778985	NA
ENSG00000301359	1.01531	1.48365	1.50587	0.98524	0.324506	NA
ENSG00000289576	0.693636	1.79819	1.8005	0.998717	0.317932	NA
SPCS2P4	4.49896	0.141943	0.676994	0.209666	0.833928	NA
ENSG00000228943	0	NA	NA	NA	NA	NA
ARL8BP2	0.153803	-0.882012	3.53381	-0.249592	0.802903	NA
RNU6-176P	0	NA	NA	NA	NA	NA
PTAFR	2.09492	-1.02215	0.988869	-1.03366	0.301296	NA
ENSG00000298310	0	NA	NA	NA	NA	NA
DNAJC8	902.45	-0.136152	0.0690119	-1.97288	0.0485095	0.402293
ENSG00000290123	0	NA	NA	NA	NA	NA
ATP5IF1	0	NA	NA	NA	NA	NA
ENSG00000270605	0.113776	0.560661	3.53381	0.158656	0.87394	NA
ENSG00000271398	0	NA	NA	NA	NA	NA
SESN2	0	NA	NA	NA	NA	NA
MED18	0.137592	0.560661	3.53381	0.158656	0.87394	NA
PHACTR4	687.238	0.015891	0.0687688	0.231078	0.817254	0.974335
DNAJC8P4	1.62779	-0.0238731	1.23184	-0.01938	0.984538	NA
RNU6ATAC27P	0.210907	-1.49878	3.52627	-0.425034	0.670812	NA
ENSG00000308327	2.41327	0.488682	1.02019	0.479009	0.631932	NA
RCC1	419.867	-0.00294838	0.0889171	-0.0331587	0.973548	0.999316
SNHG3	380.686	0.10275	0.0833459	1.23282	0.217643	0.729454
SNORA73A	3248.72	-0.2304	0.0845181	-2.72605	0.00640981	0.113265
SNORA73B	1575.29	-0.385064	0.0848635	-4.53745	5.69375e-06	0.000390036
PRDX3P2	1.9181	0.237156	0.976734	0.242805	0.808156	NA
ENSG00000279443	6.64419	0.586513	0.575474	1.01918	0.308117	NA
TRNAU1AP	120.426	-0.135392	0.14553	-0.93034	0.352195	0.826706
SNHG12	83.6438	0.224539	0.158089	1.42033	0.15551	0.654238
SNORD99	0	NA	NA	NA	NA	NA
SNORA61	0	NA	NA	NA	NA	NA
SNORA44	0.617286	2.65338	1.96331	1.35148	0.176542	NA
SNORA16A	10.5874	0.0266806	0.462563	0.0576798	0.954004	0.996262
TAF12	149.321	0.0743342	0.129233	0.575197	0.565158	0.912462
RAB42	20.3703	0.09813	0.327609	0.299534	0.764533	0.967412
TAF12-DT	7.10374	-0.564921	0.581308	-0.971812	0.331144	0.815583
ENSG00000270103	0	NA	NA	NA	NA	NA
RNU11	0	NA	NA	NA	NA	NA
GMEB1	265.397	0.0376121	0.102424	0.36722	0.713455	0.95964
ENSG00000252777	0.462275	-0.0510616	2.26888	-0.0225052	0.982045	NA
ENSG00000289291	16.09	-0.518553	0.354105	-1.4644	0.143084	0.634678
YTHDF2	976.092	0.0928116	0.0604092	1.53638	0.124445	0.605045
ENSG00000305996	0	NA	NA	NA	NA	NA
OPRD1	4.22536	0.900805	0.733894	1.22743	0.21966	NA
ENSG00000233427	0	NA	NA	NA	NA	NA
EPB41	258.078	0.299448	0.101652	2.94583	0.00322089	0.0697902
ENSG00000300997	0.307606	-1.78618	3.27046	-0.546156	0.584959	NA
ENSG00000225616	0.219884	-1.53529	3.08871	-0.497063	0.619144	NA
Metazoa_SRP	65.6516	0.194235	0.1927	1.00797	0.313471	0.804697
TMEM200B	167.492	0.0673582	0.12607	0.534292	0.59314	0.921851
ENSG00000305828	2.35408	-0.344959	0.967944	-0.356383	0.721553	NA
ENSG00000225750	1.6583	0.652315	1.13746	0.573485	0.566316	NA
SRSF4	989.462	-0.00872271	0.076862	-0.113485	0.909646	0.99069
ENSG00000277916	5.06003	0.206869	0.640977	0.32274	0.746892	NA
MECR	151.779	-0.137942	0.130689	-1.0555	0.291199	0.786734
ENSG00000237934	3.90333	1.08367	0.755809	1.43379	0.151632	NA
PTPRU	832.445	0.0279565	0.0864086	0.323538	0.746288	0.96419
LINC01756	2.10707	0.51999	1.05397	0.493363	0.621756	NA
ENSG00000300547	0.291396	-0.16067	2.82667	-0.0568409	0.954672	NA
ENSG00000300593	0	NA	NA	NA	NA	NA
ENSG00000225011	0	NA	NA	NA	NA	NA
ENSG00000300570	0	NA	NA	NA	NA	NA
ENSG00000228176	1.05419	-0.399037	1.49143	-0.267553	0.789043	NA
ENSG00000310425	0.228206	-0.160671	3.06246	-0.0524647	0.958158	NA
ENSG00000284676	0	NA	NA	NA	NA	NA
ENSG00000299394	0	NA	NA	NA	NA	NA
ENSG00000270927	0	NA	NA	NA	NA	NA
ENSG00000300797	0	NA	NA	NA	NA	NA
LINC01648	0	NA	NA	NA	NA	NA
ENSG00000304118	0	NA	NA	NA	NA	NA
ENSG00000302306	0	NA	NA	NA	NA	NA
ENSG00000302331	0	NA	NA	NA	NA	NA
ENSG00000302319	0	NA	NA	NA	NA	NA
ENSG00000233372	0	NA	NA	NA	NA	NA
ENSG00000231251	0	NA	NA	NA	NA	NA
ENSG00000306242	0	NA	NA	NA	NA	NA
ENSG00000306012	0	NA	NA	NA	NA	NA
ENSG00000236335	0	NA	NA	NA	NA	NA
ENSG00000308745	0	NA	NA	NA	NA	NA
ENSG00000231949	0	NA	NA	NA	NA	NA
ENSG00000289710	0	NA	NA	NA	NA	NA
ENSG00000301774	0.12005	0.560661	3.53381	0.158656	0.87394	NA
MATN1	2.36093	1.48195	0.980113	1.51202	0.13053	NA
MATN1-AS1	14.0932	-0.0874662	0.372917	-0.234546	0.814561	0.974214
ENSG00000287510	0	NA	NA	NA	NA	NA
LAPTM5	9.2027	0.165668	0.501978	0.330031	0.741377	0.96419
MIR4420	0	NA	NA	NA	NA	NA
ENSG00000309098	0	NA	NA	NA	NA	NA
ENSG00000306105	0	NA	NA	NA	NA	NA
ENSG00000229607	0.769758	0.720928	1.9873	0.362768	0.716778	NA
LINC01778	2.17256	0.944895	1.1283	0.83745	0.402339	NA
ENSG00000298070	0	NA	NA	NA	NA	NA
RN7SKP91	0	NA	NA	NA	NA	NA
ENSG00000235143	0	NA	NA	NA	NA	NA
SDC3	1882.34	-0.0120616	0.0615459	-0.195977	0.844628	0.979377
RN7SL371P	0	NA	NA	NA	NA	NA
ENSG00000307336	3.68732	0.708522	0.749722	0.945047	0.344635	NA
PUM1	1659.78	0.00973299	0.0530508	0.183466	0.854433	0.980762
ENSG00000237329	3.45488	0.570706	0.864633	0.660056	0.509218	NA
ENSG00000232768	2.4917	-0.00855361	0.913082	-0.00936785	0.992526	NA
SELENOWP1	0	NA	NA	NA	NA	NA
RPL21P22	0	NA	NA	NA	NA	NA
ENSG00000302667	0	NA	NA	NA	NA	NA
ENSG00000308292	2.97055	-0.235816	0.837031	-0.281729	0.778151	NA
NKAIN1	1.56581	-0.177899	1.14502	-0.155367	0.876532	NA
SNRNP40	488.02	-0.0865832	0.0901724	-0.960197	0.336956	0.819645
ENSG00000229447	4.01413	1.76603	0.811798	2.17546	0.029596	NA
ZCCHC17	250.482	-0.141618	0.11087	-1.27733	0.201486	0.711218
ENSG00000229044	1.055	2.55682	1.49742	1.70748	0.0877321	NA
FABP3	18.2513	0.277356	0.393478	0.704882	0.480884	0.883399
SERINC2	198.168	0.0670457	0.156154	0.429356	0.667664	0.94656
ENSG00000305880	1.79406	-0.106832	1.14474	-0.0933242	0.925646	NA
ENSG00000305901	0	NA	NA	NA	NA	NA
EEF1A1P46	0	NA	NA	NA	NA	NA
RNU6-40P	0	NA	NA	NA	NA	NA
LDC1P	0	NA	NA	NA	NA	NA
LINC01226	0	NA	NA	NA	NA	NA
ENSG00000229167	0.898056	0.732372	1.67538	0.437137	0.662012	NA
TINAGL1	54.9248	0.957968	0.268926	3.5622	0.000367761	0.0135163
ENSG00000305292	0.137592	0.560661	3.53381	0.158656	0.87394	NA
HCRTR1	3.01931	0.113666	0.865664	0.131305	0.895534	NA
PEF1	365.872	-0.14637	0.0982928	-1.48913	0.136454	0.627459
PEF1-AS1	24.2562	0.112072	0.294933	0.379991	0.703952	0.957298
COL16A1	1740.8	0.0669065	0.113396	0.590027	0.555172	0.908992
ENSG00000306756	49.9698	0.178681	0.26044	0.686072	0.492667	0.886988
ENSG00000295060	5.92739	0.25661	0.60303	0.425535	0.670447	NA
ADGRB2	628.238	0.0208493	0.0838954	0.248515	0.803736	0.972462
MIR4254	0.835422	-1.48522	1.76435	-0.841795	0.399903	NA
ENSG00000306226	3.72787	0.0407142	0.760712	0.0535211	0.957317	NA
ENSG00000301119	1.72637	0.87342	1.09728	0.795984	0.426041	NA
ENSG00000254545	12.8393	0.0674865	0.398651	0.169287	0.865571	0.982787
SPOCD1	747.216	0.199969	0.069503	2.87714	0.00401303	0.0812185
ENSG00000203620	0.210907	-1.49878	3.52627	-0.425034	0.670812	NA
ENSG00000269967	4.85816	0.0170897	0.632123	0.0270355	0.978431	NA
PTP4A2	3232.44	-0.0181675	0.0471965	-0.384932	0.700288	0.956761
ENSG00000288678	0	NA	NA	NA	NA	NA
ENSG00000228634	8.3116	0.666451	0.53729	1.24039	0.21483	0.726098
ENSG00000300504	0.105453	-0.882012	3.53381	-0.249592	0.802903	NA
ENSG00000284702	0	NA	NA	NA	NA	NA
KHDRBS1	3146.42	-0.0363314	0.0469455	-0.773906	0.438986	0.867379
ENSG00000203325	8.05084	0.433524	0.556397	0.779163	0.435884	0.866628
TMEM39B	201.563	-0.0891476	0.110267	-0.80847	0.41882	0.860793
MIR5585	0.21923	-0.160671	3.1038	-0.0517661	0.958715	NA
KPNA6	2055.47	-0.0156516	0.0535645	-0.292202	0.770132	0.968263
ENSG00000250135	0	NA	NA	NA	NA	NA
ENSG00000297522	1.45309	-0.112411	1.12774	-0.0996782	0.9206	NA
TXLNA	1402.35	-0.0303275	0.0556236	-0.545227	0.585598	0.918806
CCDC28B	79.7268	-0.221944	0.1789	-1.2406	0.214752	0.72607
ENSG00000224066	2.92084	0.379725	0.808807	0.469488	0.638721	NA
IQCC	34.24	0.179377	0.239165	0.750013	0.453247	0.874726
DCDC2B	37.0722	0.256949	0.245483	1.04671	0.295233	0.79212
TMEM234	60.064	0.0449361	0.18701	0.240288	0.810107	0.973353
EIF3I	1336.41	-0.06154	0.0765733	-0.803675	0.421585	0.861985
MTMR9LP	38.8373	0.108469	0.230719	0.470136	0.638258	0.938151
ENSG00000290045	6.01078	-0.218207	0.664324	-0.328465	0.74256	NA
FAM167B	4.56385	0.743798	0.678733	1.09586	0.273139	NA
LCK	0	NA	NA	NA	NA	NA
HDAC1	846.126	-0.0289135	0.0717796	-0.402809	0.687089	0.952875
MARCKSL1	2616.04	-0.222865	0.0994203	-2.24165	0.0249841	0.277015
ENSG00000305107	3.60583	-0.076616	0.752525	-0.101812	0.918906	NA
ENSG00000305127	1.07714	-0.426043	1.38856	-0.306824	0.758977	NA
ENSG00000233775	0.844066	-2.35427	1.69193	-1.39147	0.164084	NA
TSSK3	20.8143	0.23182	0.33823	0.685392	0.493097	0.887032
FAM229A	15.3455	0.322237	0.355664	0.906014	0.364928	0.834122
BSDC1	636.16	-0.0676352	0.0721157	-0.937871	0.348311	0.826161
GAPDHP20	0.105453	-0.882012	3.53381	-0.249592	0.802903	NA
ENSG00000270850	0	NA	NA	NA	NA	NA
LRRC37A12P	0	NA	NA	NA	NA	NA
ENSG00000304771	0	NA	NA	NA	NA	NA
RN7SL122P	0	NA	NA	NA	NA	NA
ENSG00000254553	0.105453	-0.882012	3.53381	-0.249592	0.802903	NA
ZBTB8B	1.64757	1.02235	1.1986	0.852952	0.393686	NA
ZBTB8A	150.784	0.259173	0.129927	1.99476	0.0460686	0.391606
ZBTB8OS	149.858	-0.102977	0.119451	-0.862086	0.38864	0.845406
ENSG00000294305	3.76261	0.454111	0.815262	0.557013	0.577519	NA
RBBP4	1858.59	-0.0175172	0.0637282	-0.274874	0.783413	0.970863
SYNC	161.796	-0.513898	0.147958	-3.47328	0.000514146	0.0170398
ENSG00000224409	0.479694	2.30021	2.1188	1.08562	0.277648	NA
NHSL3	469.445	-0.0950062	0.115451	-0.822913	0.410557	0.860199
ENSG00000304155	0.927746	-0.743887	1.71831	-0.432918	0.665074	NA
YARS1	1072.14	0.118526	0.0727389	1.62947	0.103213	0.561277
S100PBP	511.914	0.0174642	0.0783682	0.222848	0.823654	0.975848
FNDC5	11.0924	0.034103	0.482477	0.0706832	0.94365	0.995389
HPCA	2.39993	0.435339	0.886064	0.491318	0.623202	NA
TMEM54	100.282	0.0904589	0.145238	0.622832	0.533395	0.901303
ENSG00000287691	3.57727	-1.03226	0.792283	-1.30289	0.192612	NA
RNF19B	219.673	0.0079393	0.114395	0.0694023	0.944669	0.995393
ENSG00000278966	0.255806	-0.160671	2.94899	-0.0544833	0.95655	NA
ENSG00000300688	0.137592	0.560661	3.53381	0.158656	0.87394	NA
ENSG00000217644	0	NA	NA	NA	NA	NA
ENSG00000239670	0.395234	1.99515	2.572	0.775719	0.437915	NA
ENSG00000236065	5.37642	0.23863	0.595073	0.401009	0.688414	NA
AK2	939.378	0.0784767	0.0621545	1.26261	0.20673	0.720319
AZIN2	63.9184	0.17559	0.208178	0.843462	0.39897	0.854181
ENSG00000305756	4.79609	-0.406386	0.709414	-0.572847	0.566748	NA
ENSG00000278997	37.1691	-0.0265901	0.26865	-0.0989768	0.921157	0.992378
TRIM62	644.218	-0.293066	0.0841959	-3.48077	0.000499979	0.0168274
ENSG00000279179	25.625	-0.0316657	0.336312	-0.0941557	0.924985	0.99259
ENSG00000284721	0	NA	NA	NA	NA	NA
ENSG00000303059	0	NA	NA	NA	NA	NA
ENSG00000305863	2.63866	-0.469114	1.03159	-0.45475	0.649289	NA
ZNF362	648.792	-0.0443799	0.100813	-0.440219	0.659778	0.944255
ENSG00000270115	8.18947	-0.378818	0.500935	-0.756223	0.449516	0.873686
A3GALT2	0.891981	0.240555	1.72543	0.139417	0.88912	NA
ENSG00000225313	60.6027	0.136363	0.185749	0.734125	0.462873	0.880492
PHC2	1887.47	0.0330867	0.0611609	0.540977	0.588523	0.919814
MIR3605	3.87946	0.173421	0.745656	0.232575	0.816092	NA
RN7SKP16	12.8697	0.247961	0.463636	0.534818	0.592776	0.921764
PHC2-AS1	3.71389	0.433334	0.859996	0.50388	0.614346	NA
ENSG00000301698	0	NA	NA	NA	NA	NA
ENSG00000304221	0	NA	NA	NA	NA	NA
TLR12P	0	NA	NA	NA	NA	NA
ZSCAN20	167.59	-0.0597015	0.116774	-0.511256	0.609172	0.928649
ENSG00000235907	1.73597	0.631201	1.10516	0.571139	0.567905	NA
CSMD2	259.707	0.531561	0.122611	4.33534	1.45536e-05	0.00089076
ENSG00000297811	0.716466	1.91271	1.67266	1.14352	0.252825	NA
HSPD1P14	1.14107	1.04335	1.38317	0.754318	0.450658	NA
HMGB4	0.712778	-0.875724	2.06922	-0.423215	0.672139	NA
CSMD2-AS1	1.58621	0.558321	1.21718	0.4587	0.64645	NA
ENSG00000308396	0.99215	0.633344	1.39564	0.453802	0.649972	NA
ENSG00000295180	0.267579	-0.160671	2.9059	-0.0552913	0.955906	NA
RNA5SP42	0.207456	-0.160672	3.16191	-0.0508147	0.959473	NA
C1orf94	3.57748	0.95265	0.820371	1.16124	0.245543	NA
ENSG00000302624	0	NA	NA	NA	NA	NA
ENSG00000270241	0	NA	NA	NA	NA	NA
ENSG00000297436	0	NA	NA	NA	NA	NA
ENSG00000309519	0	NA	NA	NA	NA	NA
ENSG00000307130	0	NA	NA	NA	NA	NA
ENSG00000287703	0	NA	NA	NA	NA	NA
MIR552	0	NA	NA	NA	NA	NA
SMIM12	258.059	-0.178725	0.101898	-1.75396	0.0794365	0.504015
GJB5	0.23448	-0.160671	3.03497	-0.05294	0.95778	NA
GJB4	0	NA	NA	NA	NA	NA
ENSG00000255811	0	NA	NA	NA	NA	NA
GJB3	0.243046	-0.160671	2.99911	-0.0535729	0.957275	NA
GJA4	0.581142	-1.78894	1.87318	-0.955031	0.339562	NA
ENSG00000230163	0	NA	NA	NA	NA	NA
DLGAP3	1.81565	0.0418208	1.08455	0.0385604	0.969241	NA
ENSG00000284773	8.31799	-0.289981	0.482305	-0.60124	0.54768	0.90736
GPR199P	3.45249	0.312809	0.77347	0.404423	0.685901	NA
TMEM35B	4.71676	-0.109812	0.67272	-0.163236	0.870332	NA
ENSG00000271741	0	NA	NA	NA	NA	NA
ZMYM6	109.331	-0.068562	0.152851	-0.448555	0.653753	0.942818
ZMYM1	478.297	-0.045604	0.0783757	-0.581864	0.560658	0.911879
RPL12P45	0	NA	NA	NA	NA	NA
EFCAB14P1	0.153803	-0.882012	3.53381	-0.249592	0.802903	NA
ENSG00000284640	0	NA	NA	NA	NA	NA
SFPQ	3110.89	0.0139949	0.0547417	0.255654	0.798218	0.972428
ENSG00000306436	0.225503	-0.160671	3.07466	-0.0522566	0.958324	NA
ZMYM4	1424.62	0.0723293	0.0665372	1.08705	0.277014	0.778647
RN7SL503P	0.970757	-0.768969	1.51523	-0.507494	0.611808	NA
SNORA62	9.90865	0.455254	0.498201	0.913796	0.360824	0.831828
RPL5P4	4.62324	-0.11497	0.64946	-0.177024	0.859489	NA
ZMYM4-AS1	1.95693	0.146066	1.01063	0.14453	0.885082	NA
KIAA0319L	653.448	-0.0467212	0.0725464	-0.644017	0.519564	0.895428
ENSG00000236274	2.13258	0.0871713	0.983071	0.0886725	0.929342	NA
NCDN	322.326	-0.132304	0.10134	-1.30554	0.191708	0.700514
TFAP2E-AS1	0.883988	-0.61858	1.5882	-0.389486	0.696917	NA
TFAP2E	7.33823	-0.41017	0.521642	-0.786306	0.431688	0.865908
PSMB2	1355.23	-0.0540621	0.0629447	-0.858883	0.390405	0.84715
ENSG00000306977	0	NA	NA	NA	NA	NA
C1orf216	205.171	-0.0712809	0.12649	-0.563528	0.573075	0.91546
CLSPN	561.621	0.18338	0.0809525	2.26528	0.0234956	0.267713
ENSG00000232335	0.161254	-0.882012	3.53381	-0.249592	0.802903	NA
ENSG00000302368	0.105453	-0.882012	3.53381	-0.249592	0.802903	NA
AGO4	314.546	0.186755	0.0931706	2.00444	0.0450231	0.38874
AGO1	1352.84	0.0402567	0.0555919	0.724148	0.468975	0.880653
CFAP97P1	0	NA	NA	NA	NA	NA
ENSG00000286899	2.68386	0.915851	1.04466	0.876699	0.38065	NA
ENSG00000271914	0	NA	NA	NA	NA	NA
AGO3	703.127	0.0492008	0.0779248	0.631388	0.527787	0.898293
ENSG00000271554	1.76833	0.945949	1.16156	0.814381	0.415427	NA
ENSG00000293245	0.281303	-0.16067	2.85904	-0.0561974	0.955185	NA
ENSG00000232862	0	NA	NA	NA	NA	NA
TEKT2	5.25469	0.393087	0.610351	0.644035	0.519553	NA
ADPRS	221.212	-0.128097	0.164961	-0.77653	0.437436	0.867379
COL8A2	28.0998	0.55741	0.349542	1.59469	0.110782	0.57726
TRAPPC3	441.325	-0.0329041	0.0861202	-0.382072	0.702408	0.95695
MAP7D1	2644.58	-0.0408545	0.0732615	-0.557653	0.577082	0.916556
RN7SL131P	0.428833	-1.00042	2.29041	-0.436786	0.662267	NA
ENSG00000301551	0	NA	NA	NA	NA	NA
THRAP3	2540.06	0.078695	0.0560146	1.4049	0.160051	0.660705
UBE2V2P4	1.45163	0.411606	1.1711	0.35147	0.725236	NA
SH3D21	146.516	0.188074	0.12964	1.45074	0.146852	0.641644
EVA1B	0	NA	NA	NA	NA	NA
ENSG00000286379	6.77952	0.453005	0.57029	0.794341	0.426997	NA
STK40	325.42	-0.125686	0.107399	-1.17027	0.241893	0.750526
ENSG00000300693	5.35273	-0.0210168	0.598499	-0.0351159	0.971987	NA
ENSG00000300712	0	NA	NA	NA	NA	NA
LSM10	197.728	-0.126609	0.118437	-1.069	0.285071	0.784679
ENSG00000297367	9.16071	-0.328725	0.47857	-0.68689	0.492152	0.886988
RNU4-27P	0.333006	0.569432	2.759	0.206391	0.836486	NA
OSCP1	37.0349	0.12667	0.234257	0.540733	0.588691	0.919814
SNORA63C	1.56164	0.352212	1.24713	0.282419	0.777622	NA
MRPS15	350.331	-0.0946898	0.09084	-1.04238	0.297236	0.794834
CSF3R	0.222052	1.25397	3.0822	0.406843	0.684123	NA
ENSG00000297386	0	NA	NA	NA	NA	NA
ENSG00000294271	0	NA	NA	NA	NA	NA
FTLP18	0	NA	NA	NA	NA	NA
ENSG00000304879	0	NA	NA	NA	NA	NA
ENSG00000295088	0	NA	NA	NA	NA	NA
ENSG00000284705	0	NA	NA	NA	NA	NA
ENSG00000234481	0	NA	NA	NA	NA	NA
ENSG00000284720	0	NA	NA	NA	NA	NA
GRIK3	0	NA	NA	NA	NA	NA
ENSG00000223944	0	NA	NA	NA	NA	NA
ENSG00000284650	0	NA	NA	NA	NA	NA
MIR4255	0	NA	NA	NA	NA	NA
RNU6-636P	0	NA	NA	NA	NA	NA
RNA5SP43	0	NA	NA	NA	NA	NA
RPS29P6	0	NA	NA	NA	NA	NA
[truncated: 77,659 more rows]

## Sheet: S3
DEG analysis of WT and CENT hMSCs expressing GFP-progerin
[truncated: 79,173 more rows]

[truncated: 2 more sheets: S4, S5]
