# Supplementary material for: Centenarian SIRT6 variants elevate SIRT6 protein and enhance cellular senescence resistance
Source: Research Square preprint supplement (doi:10.21203/rs.3.rs-9997679/v1), 2026-06-19
Supplement: Supplementary file 2 [file f31b426f7fd3cbe3102b8d2a.docx]

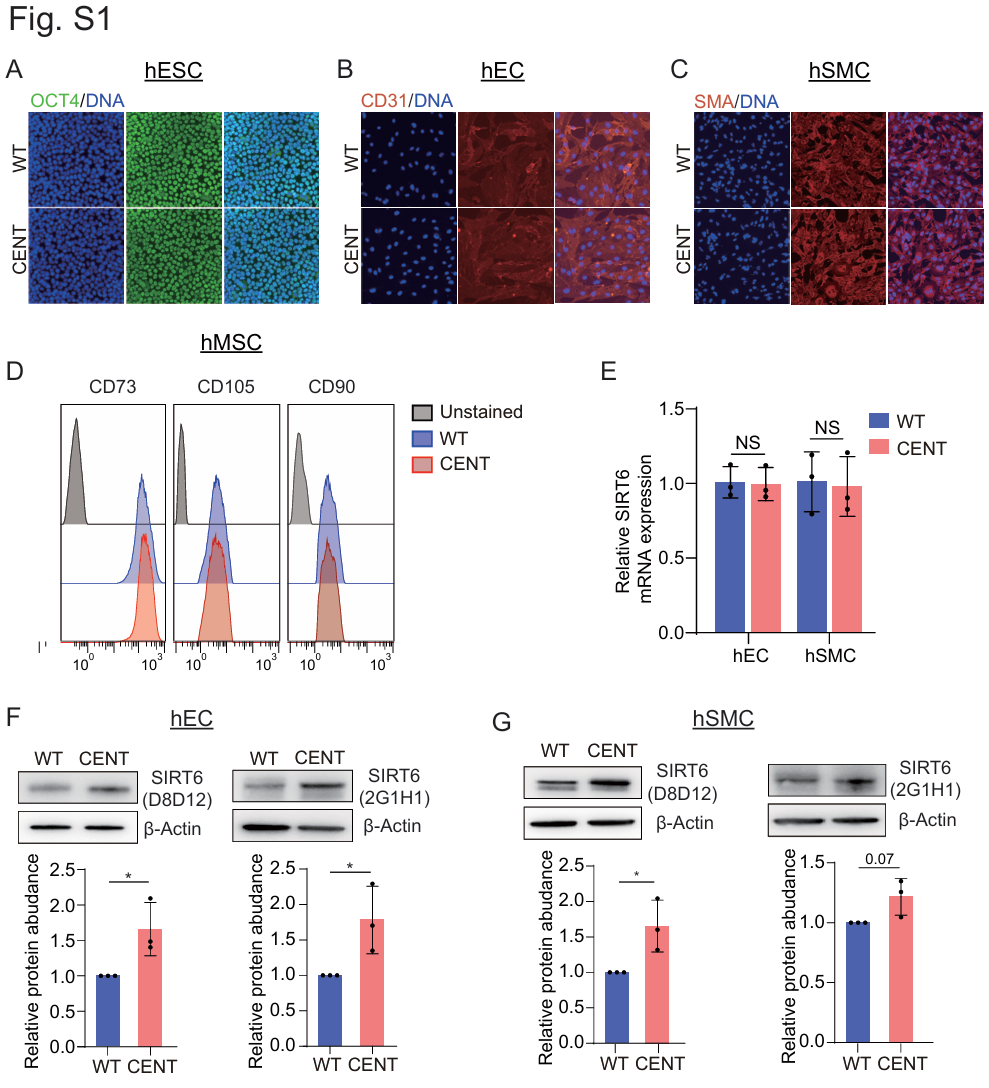


**Fig. S1. Elevated SIRT6 protein levels in hESCs and hESC-derived hECs and hSMCs carrying centenarian *SIRT6* variants.**

**(A)** Immunofluorescence staining of pluripotency marker OCT4 in WT and CENT hESCs. **(B)** Immunofluorescence staining of endothelial cell marker CD31 in hESC-derived hECs. **(C)** Immunofluorescence staining of smooth muscle cell marker SMA in hESC-derived hSMCs. **(D)** Flow cytometry of mesenchymal stromal cell marker CD73, CD90 and CD105 in hESC-derived hMSCs. **(E)** SIRT6 mRNA levels in WT and CENT hECs and hSMCs, gene expression was normalized to 18s rRNA; data were represented as mean ± SD; n = 3; NS, not significant. **(F)** SIRT6 protein levels in WT and CENT hECs. data were represented as mean ± SD; n = 3; *, p < 0.05. **(G)** SIRT6 protein levels in WT and CENT hSMCs. data were represented as mean ± SD; n = 3; *, p < 0.05.


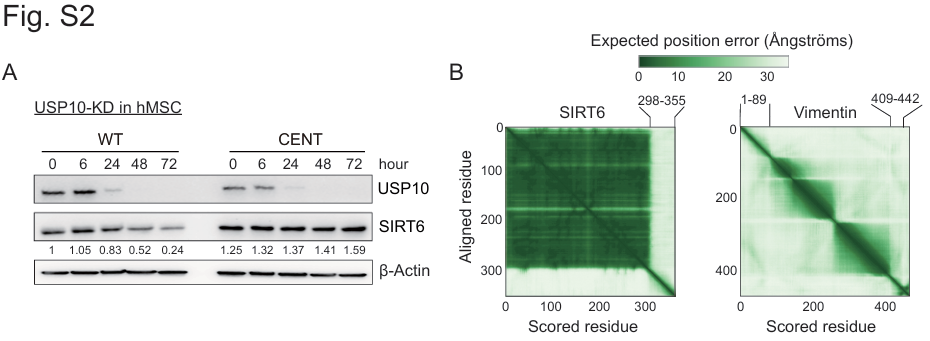


**Fig. S2. Vimentin-mediated elevation of SIRT6 protein levels in CENT hMSCs.**

1. Protein levels of USP10 and SIRT6 in WT and CENT hMSCs transfected with siRNAs targeting USP10. **(B)** AlphaFold-predicted structural confidence for SIRT6 and vimentin. Low confidence scores correspond to predicted intrinsic disorder regions (IDRs).


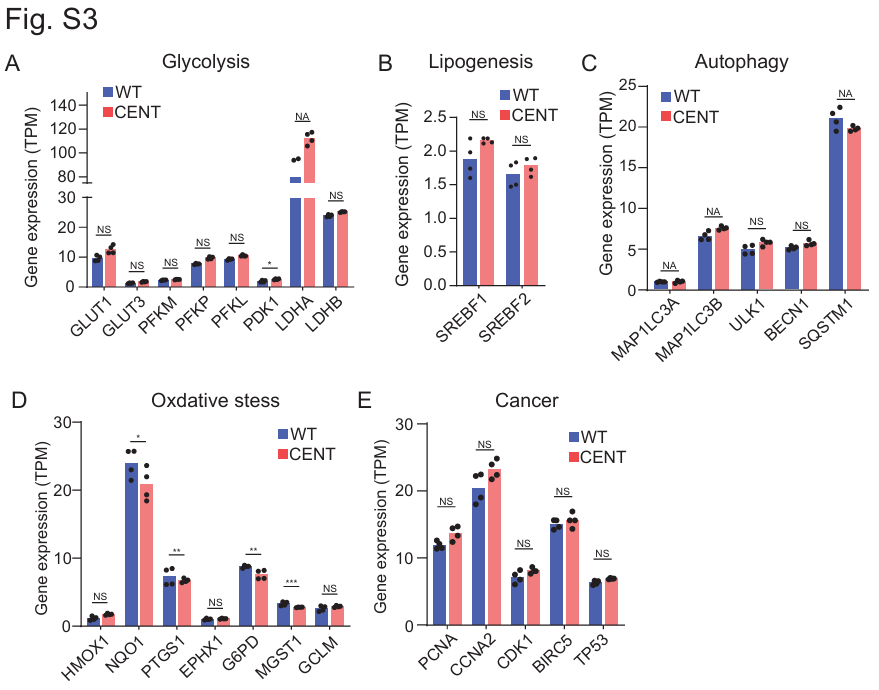


**Fig. S3. Expression of genes involving in pathways previously linked to SIRT6.**

**(A-E)** Expression of genes involving in glycolysis **(A)**, lipogenesis **(B)**, autophagy **(C)**, oxidative stress **(D)**, and cancer **(E)**.Normalized expression values (TPM: Transcripts Per Million) were used for plotting; data were represented as mean; Significance were indicated by adjusted p-values from DESeq2 analysis; *, p < 0.05; **, p < 0.01; ***, p < 0.001; NS, not significant; NA, not available.


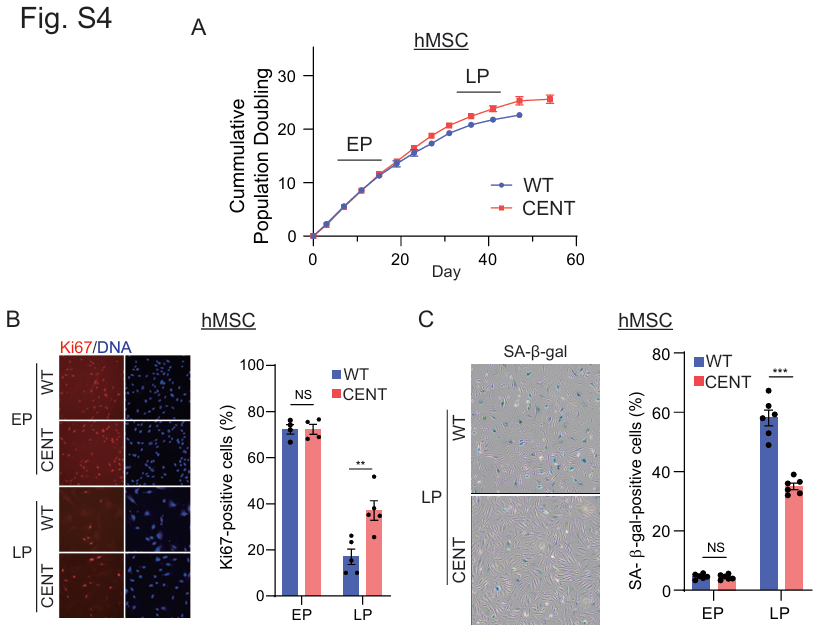


**Fig. S4. Centenarian *SIRT6* variants delay replicative senescence.**

**(A)** Growth curves of WT and CENT hMSCs. EP (early passage, passage 3-5); LP (late passage, passage 10-11), data were represented as mean ± SD, n = 2. **(B)** Immunofluorescence staining of Ki67 in WT and CENT hMSCs at EP and LP. Quantification based on 5 independent images capturing over 500 nuclei; data were represented as mean ± SD; NS, not significant; **, p < 0.01. **(C)** SA-β-gal staining in WT and CENT hMSCs at EP and LP. Quantification based on 5 independent images capturing over 500 nuclei; data were represented as mean ± SD; NS, not significant; ***, p < 0.001.


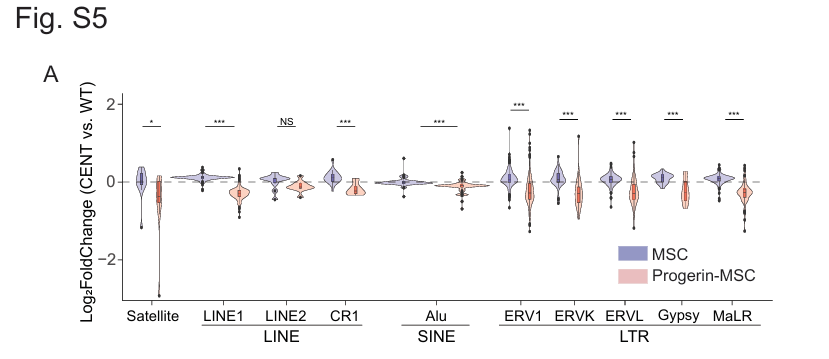


**Fig. S5. Centenarian *SIRT6* variants suppress progerin-Induced TE derepression**

**(A)** Violin plot showing the fold changes of categorized TEs in EP hMSC and Progerin-hMSCs. NS, not significant; *, p < 0.05; **, p < 0.01; ***, p < 0.001.


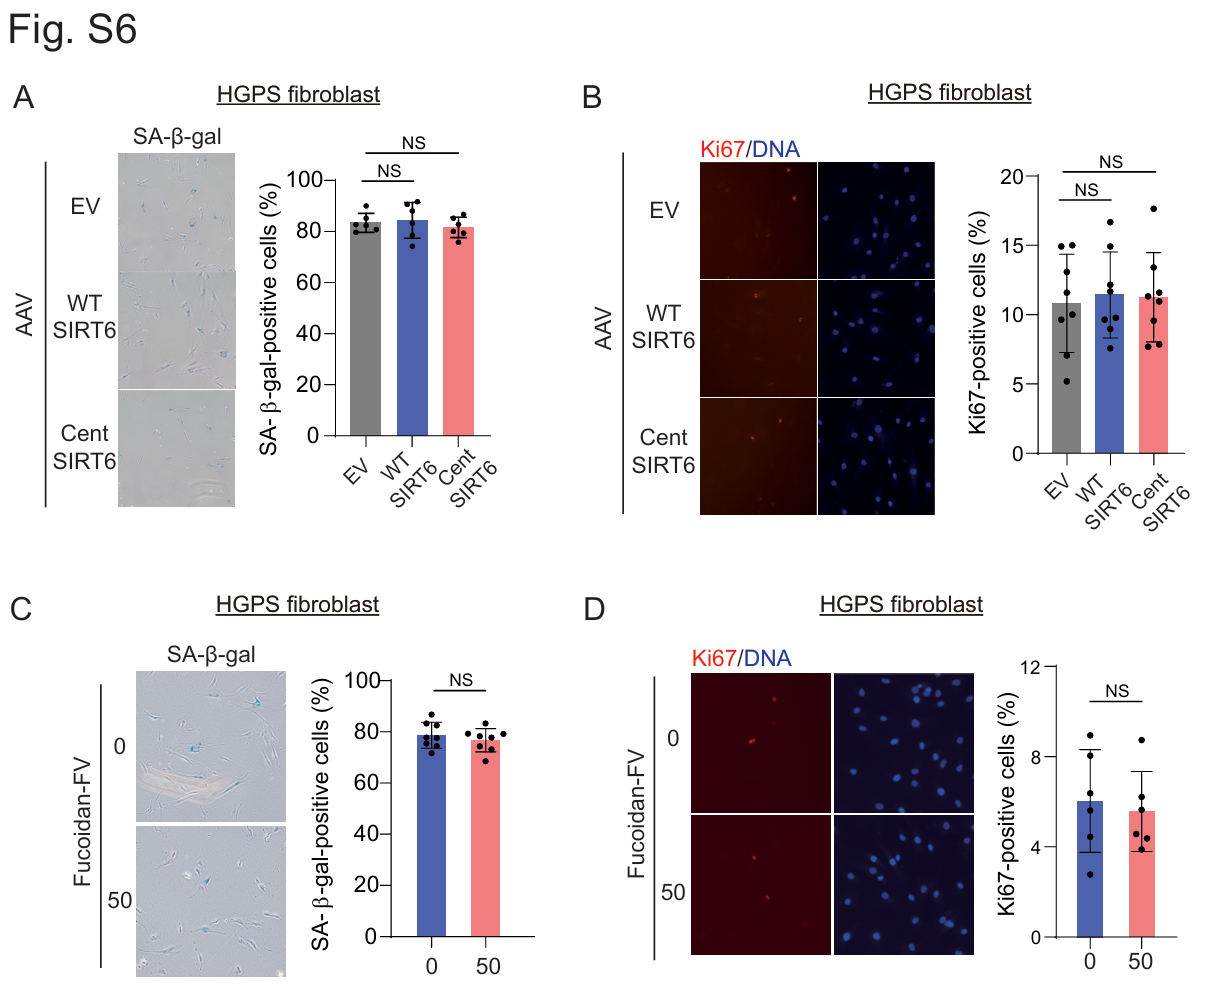


**Fig. S6. Effects of the AAV-SIRT6 treatment and SIRT6 activator Fucoidan-FV in progeria patient cells**

**(A)** SA-β-gal staining in HGPS patient fibroblasts transduced with AAV viruses. Quantification based on 6 independent images capturing over 150 cells, data were represented as mean ± SD; NS, not significant. **(B)** Immunofluorescence staining of Ki67 in HGPS patient fibroblasts transduced with AAV viruses. Quantification based on 8 independent images capturing over 500 cells; data were represented as mean ± SD; NS, not significant. **(C)** SA-β-gal staining in HGPS patient fibroblasts treated with or without 50 μg/mL Fucoidan-FV. Quantification based on 8 independent images capturing over 200 cells; data were represented as mean ± SD; NS, not significant. **(D)** Immunofluorescence staining of Ki67 in HGPS patient fibroblasts treated with or without 50 μg/mL Fucoidan-FV. Quantification based on 6 independent images capturing over 200 nuclei; data were represented as mean ± SD; NS, not significant.
